# Supplementary material for: FYCO1 Increase and Effect of Arimoclomol–Treatment in Human VCP–Pathology
Source: Biomedicines. 2022 Sep 30;10(10):2443. doi: 10.3390/biomedicines10102443 (PMC9598455; doi:10.3390/biomedicines10102443)
Supplement: Supplementary file 1 [file biomedicines-10-02443-s001.zip]

Archive with 4 entries (4 files):
- legends_to_supplementary figures.pdf
- supplementary figure 1.tif
- supplementary figure 2.tif
- supplementary table 1.xlsx
