# Supplementary material for: FYCO1 Increase and Effect of Arimoclomol–Treatment in Human VCP–Pathology
Source: Biomedicines. 2022 Sep 30;10(10):2443. doi: 10.3390/biomedicines10102443 (PMC9598455; doi:10.3390/biomedicines10102443)
Supplement: Supplementary file 1 [file biomedicines-10-02443-s001.zip › supplementary table 1.xlsx]

## Sheet: VCP trypsin
Proteomics analysis of human fibroblasts from healthy individuals (controls) and patients with a mutation in VCP on chromosome 9p13, each in biological triplicates. Each replicate was measured 3 times in randomized order. Data was processed in Progenesis QI for proteomics (Waters) and protein quantitation method was “relative quantitation using non-conflicting peptides”. Only MS/MS spectra with a…
								log2-normalized abundances						Control 1 - technical replicates					Control 2 - technical replicates					Control 3 - technical replicates					VCP 1 - technical replicates					VCP 2 - technical replicates					VCP 3 - technical replicates
														Normalized abundance					Normalized abundance					Normalized abundance					Normalized abundance					Normalized abundance					Normalized abundance
Uniprot	Gene	Protein	Peptide count	Unique peptides	log 2 (VCP/Ctrl)	p-value	FDR < 0.05	Ctrl 1	Ctrl 2	Ctrl 3	VCP 1	VCP 2	VCP 3	1	2	3	average	relative SD	1	2	3	average	relative SD	1	2	3	average	relative SD	1	2	3	average	relative SD	1	2	3	average	relative SD	1	2	3	average	relative SD
Q14669	TRIP12	E3 ubiquitin-protein ligase TRIP12	2	2	-5.31715	2.67871e-05	+	24.7085	25.4669	25.2811	19.9822	19.672	19.8509	2.83359e+07	2.68729e+07	2.70409e+07	2.74166e+07	0.0238423	4.36077e+07	4.71474e+07	4.8373e+07	4.6376e+07	0.0435668	4.20728e+07	4.04761e+07	3.9766e+07	4.07716e+07	0.0236604	823077	1.16584e+06	1.11829e+06	1.03574e+06	0.146389	986702	856120	663131	835317	0.159117	901601	975264	959913	945592	0.0335578
Q9P0V9	SEPTIN10	Septin-10	8	6	2.24079	7.60415e-05	+	21.2593	20.9316	20.9459	23.4298	23.2821	23.1472	2.30452e+06	2.40076e+06	2.8114e+06	2.50556e+06	0.0877257	2.30732e+06	1.7902e+06	1.89442e+06	1.99732e+06	0.111799	1.68047e+06	2.18104e+06	2.20228e+06	2.02127e+06	0.119298	1.03996e+07	1.07769e+07	1.27983e+07	1.13249e+07	0.0929952	1.00652e+07	1.1128e+07	9.48853e+06	1.02272e+07	0.0663971	8.12262e+06	9.07541e+06	1.06696e+07	9.2892e+06	0.113111
P22105	TNXB	Tenascin-X	25	23	1.74395	7.95535e-05	+	24.3712	24.0275	24.0935	25.902	25.8927	25.9293	2.29008e+07	2.12107e+07	2.09315e+07	2.1681e+07	0.0401275	1.6917e+07	1.79088e+07	1.65049e+07	1.71102e+07	0.0344359	1.86307e+07	1.66621e+07	1.85153e+07	1.79361e+07	0.0502914	6.71735e+07	6.09485e+07	5.98767e+07	6.26662e+07	0.0513354	6.63517e+07	6.03657e+07	6.01805e+07	6.22993e+07	0.0460114	6.35393e+07	6.42613e+07	6.3875e+07	6.38919e+07	0.004617
Q9BX67	JAM3	Junctional adhesion molecule C	4	4	0.854177	8.19993e-05	+	22.2535	22.2877	22.3239	23.1627	23.214	23.0509	5.53013e+06	4.51397e+06	4.95929e+06	5.00113e+06	0.0831613	5.77824e+06	4.5667e+06	5.01082e+06	5.11859e+06	0.0977706	4.68698e+06	5.5905e+06	5.47032e+06	5.24927e+06	0.0763176	8.73178e+06	1.01772e+07	9.25945e+06	9.38946e+06	0.0636028	9.26406e+06	8.80325e+06	1.11114e+07	9.72624e+06	0.102544	8.31271e+06	9.95441e+06	7.79458e+06	8.68723e+06	0.105978
P54709	ATP1B3	Sodium/potassium-transporting ATPase subunit beta-3	4	4	0.407309	0.000125813	+	24.4923	24.4488	24.5404	24.895	24.918	24.8904	2.54374e+07	2.30201e+07	2.22587e+07	2.35721e+07	0.0574884	2.15798e+07	2.31003e+07	2.41253e+07	2.29352e+07	0.0455963	2.24578e+07	2.6188e+07	2.45924e+07	2.44127e+07	0.0625962	3.30829e+07	2.95407e+07	3.09736e+07	3.11991e+07	0.0466307	3.10977e+07	2.81403e+07	3.59255e+07	3.17212e+07	0.101154	3.27807e+07	3.01889e+07	3.04397e+07	3.11364e+07	0.0374867
O75475	PSIP1	PC4 and SFRS1-interacting protein	6	6	0.612846	0.000167808	+	23.3376	23.3239	23.2821	23.9225	24.002	23.8576	1.02555e+07	1.0865e+07	1.06763e+07	1.05989e+07	0.0240361	9.47499e+06	9.62824e+06	1.23276e+07	1.0477e+07	0.125047	1.00597e+07	1.0839e+07	9.6797e+06	1.01928e+07	0.0473434	1.60436e+07	1.5511e+07	1.62102e+07	1.59216e+07	0.0187309	1.6023e+07	1.64284e+07	1.80895e+07	1.6847e+07	0.0530684	1.43212e+07	1.6424e+07	1.4887e+07	1.52107e+07	0.0584093
Q14011	CIRBP	Cold-inducible RNA-binding protein	6	6	-0.575921	0.000189947	+	25.763	25.8689	25.8965	25.2778	25.2868	25.236	5.62801e+07	5.7896e+07	5.66482e+07	5.69415e+07	0.0121442	6.29781e+07	5.88259e+07	6.20367e+07	6.12802e+07	0.0290067	5.54019e+07	6.74316e+07	6.45572e+07	6.24636e+07	0.0821184	3.79817e+07	4.08642e+07	4.31946e+07	4.06801e+07	0.0524122	3.73841e+07	4.09605e+07	4.44604e+07	4.0935e+07	0.0705748	3.69618e+07	4.06459e+07	4.09447e+07	3.95175e+07	0.0458332
Q92597	NDRG1	Protein NDRG1	2	2	0.474902	0.000248217	+	21.4676	21.4825	21.5823	21.9672	21.9777	22.0122	2.5916e+06	3.20653e+06	2.91118e+06	2.9031e+06	0.0864974	2.51996e+06	3.00723e+06	3.24945e+06	2.92555e+06	0.103694	3.03092e+06	3.36782e+06	3.02241e+06	3.14038e+06	0.0512225	4.37711e+06	3.70513e+06	4.21005e+06	4.09743e+06	0.0697167	4.35488e+06	3.97634e+06	4.05391e+06	4.12838e+06	0.0395465	4.20475e+06	4.21888e+06	4.28031e+06	4.23465e+06	0.00774608
Q96IJ6	GMPPA	Mannose-1-phosphate guanyltransferase alpha	2	2	-0.821139	0.000267034	+	20.5611	20.5105	20.3997	19.6802	19.5807	19.7469	1.63107e+06	1.57794e+06	1.43202e+06	1.54701e+06	0.0543965	1.3189e+06	1.75948e+06	1.40292e+06	1.49377e+06	0.127861	1.29666e+06	1.5779e+06	1.2754e+06	1.38332e+06	0.0996609	814536	859037	846789	840121	0.0223411	764666	781941	805807	784138	0.0215107	854214	841692	943607	879837	0.0515785
Q15746	MYLK	Myosin light chain kinase, smooth muscle	2	2	-3.19311	0.000332013	+	21.5817	21.6426	20.9477	18.0697	17.9914	18.5316	3.06649e+06	3.21643e+06	3.1331e+06	3.13867e+06	0.0195427	3.55797e+06	2.88125e+06	3.38257e+06	3.27393e+06	0.0875858	1.86943e+06	2.21376e+06	1.98425e+06	2.02248e+06	0.0707786	308569	280045	236771	275129	0.107284	344903	255116	181717	260579	0.256094	378055	361127	397615	378932	0.0393442
Q13162	PRDX4	Peroxiredoxin-4	13	11	-0.632089	0.000390151	+	26.5755	26.75	26.7358	26.0722	26.0643	26.0286	1.00472e+08	1.02779e+08	9.67635e+07	1.00005e+08	0.0247775	1.16676e+08	1.12942e+08	1.08978e+08	1.12865e+08	0.0278471	1.126e+08	1.09525e+08	1.1314e+08	1.11755e+08	0.0142447	6.98423e+07	7.38029e+07	6.80075e+07	7.05509e+07	0.034279	7.4032e+07	6.77823e+07	6.86881e+07	7.01675e+07	0.0392995	6.6283e+07	6.72032e+07	7.1865e+07	6.84504e+07	0.035698
O75694	NUP155	Nuclear pore complex protein Nup155	4	4	0.569972	0.000468528	+	21.2477	21.4221	21.3266	21.9423	21.8876	21.8764	2.69919e+06	2.66435e+06	2.09959e+06	2.48771e+06	0.110469	2.26731e+06	3.29015e+06	2.86789e+06	2.80845e+06	0.149435	2.46108e+06	2.59428e+06	2.84779e+06	2.63438e+06	0.0608866	3.20315e+06	4.49546e+06	4.39724e+06	4.03195e+06	0.145692	3.58825e+06	3.81042e+06	4.25542e+06	3.8847e+06	0.0714048	3.39759e+06	4.41505e+06	3.72475e+06	3.84579e+06	0.110277
P50395	GDI2	Rab GDP dissociation inhibitor beta	25	19	-0.292769	0.000509113	+	27.1716	27.1843	27.2368	26.9369	26.8669	26.9106	1.53237e+08	1.53724e+08	1.46544e+08	1.51168e+08	0.0216696	1.52955e+08	1.57335e+08	1.47225e+08	1.52505e+08	0.0271442	1.57238e+08	1.60724e+08	1.56501e+08	1.58154e+08	0.0116453	1.2872e+08	1.31215e+08	1.25474e+08	1.2847e+08	0.0182965	1.25772e+08	1.22632e+08	1.18756e+08	1.22387e+08	0.0234487	1.21224e+08	1.28397e+08	1.28834e+08	1.26152e+08	0.0276567
P07237	P4HB	Protein disulfide-isomerase	27	27	-0.397568	0.000520069	+	30.2405	30.2996	30.1731	29.8558	29.8133	29.8515	1.27881e+09	1.26684e+09	1.25998e+09	1.26854e+09	0.00613318	1.29896e+09	1.34629e+09	1.31949e+09	1.32158e+09	0.0146647	1.22353e+09	1.19577e+09	1.21254e+09	1.21061e+09	0.00942717	9.96472e+08	9.55296e+08	9.6301e+08	9.71593e+08	0.0183947	9.73312e+08	9.37264e+08	9.19583e+08	9.43386e+08	0.0236998	9.48876e+08	9.87959e+08	9.69276e+08	9.68704e+08	0.0164761
O14907	TAX1BP3	Tax1-binding protein 3	2	2	-0.527881	0.00053852	+	24.3066	24.2686	24.1359	23.7027	23.7233	23.7014	2.08425e+07	1.97098e+07	2.16973e+07	2.07499e+07	0.0392309	1.69043e+07	2.13835e+07	2.23431e+07	2.02103e+07	0.117282	1.56782e+07	1.70804e+07	2.25464e+07	1.8435e+07	0.160729	1.37645e+07	1.37533e+07	1.34422e+07	1.36533e+07	0.01094	1.35653e+07	1.43509e+07	1.36316e+07	1.38493e+07	0.0256851	1.30307e+07	1.38213e+07	1.40706e+07	1.36409e+07	0.0324969
Q8TED1	GPX8	Probable glutathione peroxidase 8	5	5	-1.57332	0.000558283	+	23.8161	23.9431	23.4265	22.1593	22.1922	22.1143	1.52975e+07	1.45386e+07	1.44722e+07	1.47694e+07	0.0253502	1.55139e+07	1.58494e+07	1.70235e+07	1.61289e+07	0.0401275	1.08068e+07	1.07064e+07	1.23089e+07	1.1274e+07	0.0650075	5.11301e+06	4.31173e+06	4.62716e+06	4.68397e+06	0.0703631	4.85646e+06	4.65336e+06	4.86607e+06	4.79196e+06	0.0204684	4.38976e+06	4.99138e+06	4.23931e+06	4.54015e+06	0.071567
P40261	NNMT	Nicotinamide N-methyltransferase	6	5	-0.896952	0.000663654	+	25.6893	25.7784	25.7959	24.8264	24.7239	25.0226	5.38616e+07	5.36344e+07	5.48279e+07	5.4108e+07	0.00956318	5.3531e+07	5.99444e+07	5.91856e+07	5.75537e+07	0.049715	5.51926e+07	5.81757e+07	6.13998e+07	5.82561e+07	0.0435099	2.9444e+07	2.91675e+07	3.06369e+07	2.97495e+07	0.0214315	2.66488e+07	2.69611e+07	2.95178e+07	2.77092e+07	0.0463816	3.15659e+07	3.49993e+07	3.56849e+07	3.40834e+07	0.0528711
Q53EP0	FNDC3B	Fibronectin type III domain-containing protein 3B	5	5	-0.84314	0.000727609	+	22.9598	22.8111	22.6881	21.9007	22.0539	21.975	8.37964e+06	7.6243e+06	8.46991e+06	8.15795e+06	0.046475	6.9278e+06	7.07339e+06	8.07581e+06	7.359e+06	0.0693487	6.37983e+06	6.63498e+06	7.25801e+06	6.75761e+06	0.0545837	3.72321e+06	3.74132e+06	4.2813e+06	3.91528e+06	0.0661311	3.61781e+06	5.08862e+06	4.35517e+06	4.35387e+06	0.137913	3.63695e+06	4.30135e+06	4.42819e+06	4.12216e+06	0.0841749
Q09028	RBBP4	Histone-binding protein RBBP4	4	2	0.235036	0.000753131		23.8288	23.867	23.7895	24.0443	24.0609	24.0854	1.47463e+07	1.47029e+07	1.51786e+07	1.48759e+07	0.0144359	1.44908e+07	1.50614e+07	1.63072e+07	1.52865e+07	0.0496132	1.29317e+07	1.51733e+07	1.55183e+07	1.45411e+07	0.078859	1.82153e+07	1.61189e+07	1.77106e+07	1.73482e+07	0.0514973	1.88747e+07	1.58032e+07	1.7886e+07	1.75213e+07	0.0730635	1.63028e+07	1.75093e+07	1.94881e+07	1.77667e+07	0.073907
P62249	RPS16	40S ribosomal protein S16	7	7	-0.37704	0.000787487	+	26.7415	26.6059	26.6575	26.3108	26.2712	26.2918	1.15878e+08	1.12251e+08	1.08483e+08	1.12204e+08	0.0269045	1.11493e+08	9.90592e+07	9.58592e+07	1.02137e+08	0.066022	1.12848e+08	1.03303e+08	1.01404e+08	1.05851e+08	0.0473107	8.95915e+07	8.07159e+07	7.94192e+07	8.32422e+07	0.0543083	9.31861e+07	7.61842e+07	7.3587e+07	8.09858e+07	0.107326	8.31652e+07	8.28084e+07	8.04918e+07	8.21551e+07	0.0144255
P19623	SRM	Spermidine synthase	2	2	-0.897727	0.000790404	+	20.4199	20.5638	20.2572	19.5537	19.4317	19.5623	1.60847e+06	1.2021e+06	1.39796e+06	1.40285e+06	0.118283	1.63943e+06	1.57788e+06	1.43242e+06	1.54991e+06	0.0559989	1.25553e+06	1.26676e+06	1.23747e+06	1.25326e+06	0.00962762	868571	733540	706623	769578	0.0920711	548268	846333	726953	707185	0.1732	847999	648351	826193	774181	0.115502
P46783	RPS10	40S ribosomal protein S10	7	7	-0.456851	0.000825804	+	26.9076	26.9967	26.8333	26.476	26.4708	26.4202	1.27038e+08	1.24842e+08	1.25789e+08	1.2589e+08	0.00714553	1.31972e+08	1.34382e+08	1.3537e+08	1.33908e+08	0.0106596	1.16004e+08	1.21242e+08	1.21465e+08	1.1957e+08	0.0211027	9.14928e+07	9.44838e+07	9.40524e+07	9.3343e+07	0.0141422	9.03176e+07	9.34996e+07	9.51934e+07	9.30035e+07	0.0217326	8.49179e+07	9.2866e+07	9.1607e+07	8.9797e+07	0.0388442
P12931	SRC	Proto-oncogene tyrosine-protein kinase Src	7	4	1.15131	0.000831897	+	21.2361	21.2185	21.3857	22.6518	22.3831	22.2593	2.6138e+06	2.58469e+06	2.20371e+06	2.4674e+06	0.0757219	2.01838e+06	2.79357e+06	2.51704e+06	2.44299e+06	0.131303	3.11292e+06	2.4383e+06	2.6744e+06	2.74187e+06	0.101944	6.62743e+06	6.52664e+06	6.62618e+06	6.59342e+06	0.00716156	5.25169e+06	5.56292e+06	5.58814e+06	5.46758e+06	0.0279844	5.21602e+06	4.99513e+06	4.85461e+06	5.02192e+06	0.0296215
P13674	P4HA1	Prolyl 4-hydroxylase subunit alpha-1	18	18	-0.666051	0.000849511	+	28.1113	28.0733	27.8779	27.3874	27.3363	27.3406	2.81555e+08	2.90825e+08	2.97489e+08	2.89956e+08	0.0225341	2.78061e+08	2.82023e+08	2.87207e+08	2.8243e+08	0.0132594	2.44535e+08	2.43872e+08	2.51527e+08	2.46645e+08	0.0140407	1.71589e+08	1.74553e+08	1.80525e+08	1.75556e+08	0.0211698	1.59928e+08	1.71621e+08	1.76822e+08	1.69457e+08	0.0416907	1.63524e+08	1.72654e+08	1.73691e+08	1.69956e+08	0.026876
P02461	COL3A1	Collagen alpha-1(III) chain	6	6	-1.52534	0.000922817	+	24.9205	25.2899	24.8894	23.2989	23.7011	23.5238	3.3434e+07	3.23759e+07	2.94539e+07	3.17546e+07	0.0530069	3.94745e+07	4.40158e+07	3.95792e+07	4.10231e+07	0.0515935	3.03929e+07	3.10462e+07	3.17946e+07	3.10779e+07	0.0184273	1.02922e+07	1.04755e+07	1.01912e+07	1.03196e+07	0.0114009	1.42563e+07	1.31521e+07	1.35046e+07	1.36377e+07	0.0337658	1.07159e+07	1.18876e+07	1.3578e+07	1.20605e+07	0.0974117
Q13557	CAMK2D	Calcium/calmodulin-dependent protein kinase type II subunit delta	14	11	0.462575	0.000930939	+	26.8858	26.965	27.0296	27.4234	27.3662	27.4785	1.21731e+08	1.25439e+08	1.24629e+08	1.23933e+08	0.0128439	1.27965e+08	1.28918e+08	1.35209e+08	1.30697e+08	0.0245916	1.31886e+08	1.43461e+08	1.36861e+08	1.37403e+08	0.0345013	1.78817e+08	1.80293e+08	1.82209e+08	1.8044e+08	0.00769641	1.64666e+08	1.74451e+08	1.79517e+08	1.72878e+08	0.0356565	1.82934e+08	1.87028e+08	1.90061e+08	1.86674e+08	0.0156434
P62241	RPS8	40S ribosomal protein S8	9	9	-0.375029	0.000993411	+	27.9166	27.9487	27.9139	27.6354	27.507	27.5117	2.52066e+08	2.52e+08	2.56019e+08	2.53362e+08	0.00741742	2.47103e+08	2.67769e+08	2.62296e+08	2.59056e+08	0.0337477	2.53341e+08	2.47512e+08	2.57781e+08	2.52878e+08	0.0166288	2.19239e+08	2.0414e+08	2.02072e+08	2.08484e+08	0.0367025	1.9413e+08	1.93351e+08	1.84733e+08	1.90738e+08	0.0223231	1.84405e+08	1.90677e+08	1.98997e+08	1.9136e+08	0.0312338
O75874	IDH1	Isocitrate dehydrogenase [NADP] cytoplasmic	11	11	0.5693	0.00112775	+	26.038	26.0793	26.2463	26.6595	26.7389	26.673	6.73324e+07	6.74801e+07	7.1921e+07	6.89112e+07	0.030897	7.00287e+07	7.19496e+07	7.06105e+07	7.08629e+07	0.0113491	7.55932e+07	8.05867e+07	8.2668e+07	7.9616e+07	0.0372881	1.04829e+08	1.04571e+08	1.07844e+08	1.05748e+08	0.0140527	1.07601e+08	1.15576e+08	1.12036e+08	1.11738e+08	0.029197	1.02947e+08	1.07701e+08	1.10969e+08	1.07206e+08	0.0307238
P45974	USP5	Ubiquitin carboxyl-terminal hydrolase 5	13	13	0.255834	0.00112958		24.7846	24.8288	24.7796	25.1015	25.0484	25.0105	2.8265e+07	3.00387e+07	2.83512e+07	2.8885e+07	0.0282685	2.97152e+07	2.98574e+07	2.98946e+07	2.98224e+07	0.00259267	2.69032e+07	3.10557e+07	2.83642e+07	2.87743e+07	0.0597719	3.38858e+07	3.66328e+07	3.75686e+07	3.60291e+07	0.0433804	3.4005e+07	3.58906e+07	3.43331e+07	3.47429e+07	0.023674	3.37133e+07	3.37179e+07	3.39527e+07	3.37946e+07	0.00330691
Q9NYL9	TMOD3	Tropomodulin-3	7	7	0.518066	0.00113674	+	24.7695	24.7695	24.6757	25.3135	25.1488	25.3066	2.99818e+07	2.55462e+07	3.02657e+07	2.85979e+07	0.0755647	2.71317e+07	2.76367e+07	3.09702e+07	2.85795e+07	0.0595876	2.57986e+07	2.72565e+07	2.72246e+07	2.67599e+07	0.0254058	4.23949e+07	3.96215e+07	4.29355e+07	4.16506e+07	0.0348536	3.77095e+07	3.57149e+07	3.8157e+07	3.71938e+07	0.0285418	3.83808e+07	4.33075e+07	4.29616e+07	4.155e+07	0.0540405
Q10471	GALNT2	Polypeptide N-acetylgalactosaminyltransferase 2	7	6	-0.545842	0.00115208	+	24.0881	23.9933	23.9001	23.5131	23.3843	23.4466	1.75332e+07	1.82118e+07	1.77549e+07	1.78333e+07	0.0158436	1.62038e+07	1.66969e+07	1.71987e+07	1.66998e+07	0.0243216	1.48841e+07	1.52463e+07	1.68327e+07	1.56544e+07	0.0540558	1.12617e+07	1.13777e+07	1.32741e+07	1.19712e+07	0.077063	1.07896e+07	1.08007e+07	1.12568e+07	1.0949e+07	0.0198794	1.18413e+07	1.18558e+07	1.0599e+07	1.1432e+07	0.0515298
Q4V9L6	TMEM119	Transmembrane protein 119	5	5	0.767593	0.00117362	+	25.0732	25.1833	25.1908	26.0854	25.848	25.8167	3.6191e+07	3.50169e+07	3.45651e+07	3.52577e+07	0.0194366	3.73358e+07	3.76193e+07	3.94351e+07	3.81301e+07	0.0243912	3.75286e+07	3.98733e+07	3.75432e+07	3.8315e+07	0.0287582	7.70002e+07	6.78797e+07	6.85706e+07	7.11502e+07	0.0582735	6.30707e+07	5.9581e+07	5.84765e+07	6.03761e+07	0.0324304	5.73419e+07	6.04835e+07	5.95381e+07	5.91212e+07	0.0222592
O15460	P4HA2	Prolyl 4-hydroxylase subunit alpha-2	15	13	-1.07697	0.00138264	+	26.8989	27.1937	26.8152	25.7727	25.8788	26.0253	1.24187e+08	1.26057e+08	1.25155e+08	1.25133e+08	0.006102	1.48387e+08	1.54707e+08	1.57418e+08	1.53504e+08	0.0246497	1.17974e+08	1.17732e+08	1.18532e+08	1.18079e+08	0.0028382	5.70306e+07	5.90151e+07	5.59347e+07	5.73268e+07	0.0222393	6.38624e+07	5.8115e+07	6.31283e+07	6.17019e+07	0.0413918	6.74382e+07	6.90632e+07	6.83928e+07	6.8298e+07	0.0097627
Q5HYK7	SH3D19	SH3 domain-containing protein 19	6	6	0.686712	0.00141244	+	21.4015	21.3101	21.3321	22.1143	21.8689	22.1206	2.58202e+06	2.95267e+06	2.77702e+06	2.77057e+06	0.0546407	2.35981e+06	2.53393e+06	2.92049e+06	2.60474e+06	0.0899555	2.60106e+06	2.73816e+06	2.58939e+06	2.64287e+06	0.0255594	4.8046e+06	4.22762e+06	4.58288e+06	4.53837e+06	0.0523633	3.83523e+06	3.80295e+06	3.84748e+06	3.82856e+06	0.00490547	4.83391e+06	4.88391e+06	3.965e+06	4.56094e+06	0.0924999
P07996	THBS1	Thrombospondin-1	34	32	-2.17942	0.00145352	+	29.0419	29.3641	28.4298	26.7157	26.8732	26.7087	5.58391e+08	5.59191e+08	5.40443e+08	5.52675e+08	0.0156608	6.92082e+08	7.04207e+08	6.76721e+08	6.91003e+08	0.016276	3.57637e+08	3.54117e+08	3.73054e+08	3.61603e+08	0.0227425	1.04887e+08	1.1132e+08	1.14419e+08	1.10209e+08	0.0360201	1.15422e+08	1.21392e+08	1.31955e+08	1.22923e+08	0.0556091	1.09749e+08	1.11477e+08	1.07809e+08	1.09678e+08	0.0136608
P49327	FASN	Fatty acid synthase	46	45	0.935703	0.00152427	+	27.217	27.2625	26.965	28.1263	28.1937	27.9316	1.55887e+08	1.56508e+08	1.55971e+08	1.56122e+08	0.00176163	1.55647e+08	1.61868e+08	1.64795e+08	1.6077e+08	0.0237255	1.27709e+08	1.33077e+08	1.31703e+08	1.3083e+08	0.0174041	2.78962e+08	2.95546e+08	3.05607e+08	2.93371e+08	0.0374475	2.89252e+08	3.18594e+08	3.13596e+08	3.07147e+08	0.0417302	2.50312e+08	2.53273e+08	2.63317e+08	2.55634e+08	0.0217717
P62753	RPS6	40S ribosomal protein S6	13	13	-0.246047	0.00152533		27.8346	27.8144	27.7657	27.593	27.5723	27.5113	2.36867e+08	2.51137e+08	2.30058e+08	2.39354e+08	0.0366952	2.36381e+08	2.41913e+08	2.29813e+08	2.36036e+08	0.0209535	2.3083e+08	2.29849e+08	2.23906e+08	2.28195e+08	0.0134043	2.06489e+08	1.9834e+08	2.02505e+08	2.02445e+08	0.0164346	2.07067e+08	2.06301e+08	1.8534e+08	1.99569e+08	0.0504413	2.02432e+08	1.87007e+08	1.8447e+08	1.91303e+08	0.0414898
Q9UNF0	PACSIN2	Protein kinase C and casein kinase substrate in neurons protein 2	2	2	0.858973	0.00157528	+	21.5117	21.502	21.5404	22.5823	22.1976	22.3511	2.6713e+06	2.70555e+06	3.60271e+06	2.99319e+06	0.144069	3.73827e+06	2.81308e+06	2.37079e+06	2.97405e+06	0.191577	3.27522e+06	2.45221e+06	3.42663e+06	3.05135e+06	0.140313	6.86512e+06	6.24615e+06	5.71938e+06	6.27688e+06	0.0745994	4.77262e+06	4.37277e+06	5.28787e+06	4.81108e+06	0.0778578	5.33058e+06	5.41422e+06	5.29402e+06	5.34627e+06	0.00941015
Q9NWM8	FKBP14	Peptidyl-prolyl cis-trans isomerase FKBP14	4	4	-1.02831	0.00157869	+	20.7726	20.5139	20.6815	19.8326	19.6004	19.45	1.52198e+06	1.84342e+06	2.0087e+06	1.79136e+06	0.112808	1.43773e+06	1.53253e+06	1.52142e+06	1.49723e+06	0.0282616	1.52463e+06	1.69615e+06	1.82421e+06	1.68166e+06	0.072981	856597	907552	1.03699e+06	933711	0.0813213	1.02803e+06	614558	742107	794899	0.217484	705848	795592	647134	716192	0.0852389
Q53EL6	PDCD4	Programmed cell death protein 4	3	3	0.924936	0.00159786	+	23.5869	23.2506	23.4298	24.317	24.4862	24.239	1.24365e+07	1.22909e+07	1.30552e+07	1.25942e+07	0.0263097	9.85325e+06	1.02627e+07	9.82803e+06	9.98132e+06	0.0199588	1.09121e+07	1.02258e+07	1.28397e+07	1.13259e+07	0.097699	1.95752e+07	2.31759e+07	1.99595e+07	2.09035e+07	0.0772328	2.1065e+07	2.3873e+07	2.54724e+07	2.34701e+07	0.0776203	1.97623e+07	2.01281e+07	1.94697e+07	1.97867e+07	0.0136116
O75822	EIF3J	Eukaryotic translation initiation factor 3 subunit J	3	3	0.262006	0.00161841		26.8385	26.7895	26.7771	27.1214	27.0296	27.0401	1.19725e+08	1.18702e+08	1.22231e+08	1.20219e+08	0.012332	1.04332e+08	1.15186e+08	1.28015e+08	1.15844e+08	0.0835591	1.07954e+08	1.15268e+08	1.21597e+08	1.1494e+08	0.0484997	1.52375e+08	1.42248e+08	1.44222e+08	1.46282e+08	0.0299634	1.36328e+08	1.40127e+08	1.35126e+08	1.37194e+08	0.0155332	1.29504e+08	1.38774e+08	1.47197e+08	1.38492e+08	0.052175
P15927	RPA2	Replication protein A 32 kDa subunit	3	2	0.65635	0.0016646	+	22.2125	22.3565	22.0691	22.9171	22.8651	22.8249	4.58238e+06	4.84251e+06	5.16228e+06	4.86239e+06	0.0487744	5.62548e+06	5.3869e+06	5.09183e+06	5.36807e+06	0.0406608	4.01965e+06	4.48722e+06	4.69715e+06	4.40134e+06	0.0643392	6.07446e+06	9.15523e+06	8.53188e+06	7.92052e+06	0.167911	6.24674e+06	8.46219e+06	8.21049e+06	7.63981e+06	0.129636	7.68931e+06	6.57318e+06	8.01548e+06	7.42599e+06	0.0831612
P56537	EIF6	Eukaryotic translation initiation factor 6	4	4	-0.38621	0.00174302	+	25.1881	25.1946	25.038	24.7643	24.7613	24.7364	3.84602e+07	3.91318e+07	3.70868e+07	3.82263e+07	0.0222644	3.95635e+07	3.78022e+07	3.78334e+07	3.83997e+07	0.0214329	3.54457e+07	3.58984e+07	3.20044e+07	3.44495e+07	0.050474	2.94584e+07	2.8659e+07	2.73731e+07	2.84968e+07	0.0301432	2.69725e+07	3.0008e+07	2.83332e+07	2.84379e+07	0.0436554	2.85333e+07	2.76881e+07	2.76313e+07	2.79509e+07	0.0147574
Q07157	TJP1	Tight junction protein ZO-1	7	7	0.638348	0.00176832	+	23.2155	23.1825	23.1488	23.9847	23.7695	23.7077	9.66673e+06	1.05675e+07	8.98269e+06	9.73897e+06	0.0666409	9.28092e+06	9.73883e+06	9.52733e+06	9.51569e+06	0.0196643	9.16095e+06	1.00608e+07	8.67878e+06	9.30018e+06	0.0615838	1.59892e+07	1.87738e+07	1.50791e+07	1.6614e+07	0.094602	1.06526e+07	1.57058e+07	1.63952e+07	1.42512e+07	0.179643	1.46764e+07	1.31954e+07	1.33118e+07	1.37279e+07	0.0489806
Q96LD4	TRIM47	Tripartite motif-containing protein 47	5	5	1.63887	0.0019074	+	20.1332	20.417	20.895	22.0789	22.1976	22.0854	1.16822e+06	982076	1.31411e+06	1.1548e+06	0.117669	956762	1.75013e+06	1.50075e+06	1.40255e+06	0.236178	1.87919e+06	1.99173e+06	1.98451e+06	1.95181e+06	0.026351	4.40828e+06	4.11566e+06	4.75918e+06	4.4277e+06	0.0594154	4.0017e+06	4.58584e+06	5.83294e+06	4.80683e+06	0.15889	4.33056e+06	4.27307e+06	4.7408e+06	4.44814e+06	0.046821
P33240	CSTF2	Cleavage stimulation factor subunit 2	5	5	0.556031	0.00191358	+	22.8746	23.0426	22.8034	23.4551	23.5165	23.417	7.158e+06	8.42426e+06	7.49391e+06	7.69206e+06	0.0696303	7.44562e+06	8.92832e+06	9.54457e+06	8.6395e+06	0.101961	6.67048e+06	8.41367e+06	6.86299e+06	7.31572e+06	0.106666	9.82834e+06	1.25137e+07	1.22372e+07	1.15264e+07	0.10463	1.06726e+07	1.23645e+07	1.29169e+07	1.19847e+07	0.0796653	1.24453e+07	1.02437e+07	1.0991e+07	1.12267e+07	0.081424
P61353	RPL27	60S ribosomal protein L27	6	6	-0.278229	0.00194664		27.3769	27.2524	27.3341	27.02	27.0467	27.062	1.81503e+08	1.71077e+08	1.70285e+08	1.74289e+08	0.0293298	1.64787e+08	1.59233e+08	1.55629e+08	1.59883e+08	0.0235595	1.74968e+08	1.65956e+08	1.66643e+08	1.69189e+08	0.0242099	1.48051e+08	1.26643e+08	1.33587e+08	1.36094e+08	0.0655244	1.51807e+08	1.3587e+08	1.28223e+08	1.38633e+08	0.0708666	1.41778e+08	1.3867e+08	1.39883e+08	1.40111e+08	0.00912843
O14579	COPE	Coatomer subunit epsilon	10	10	-0.65043	0.00199976	+	25.3006	25.4896	25.3446	24.8172	24.5889	24.7774	3.8634e+07	4.0791e+07	4.4555e+07	4.13267e+07	0.0592043	4.64913e+07	4.78312e+07	4.70191e+07	4.71139e+07	0.0116976	4.25035e+07	4.10887e+07	4.4233e+07	4.26084e+07	0.0301766	2.96188e+07	3.01559e+07	2.8911e+07	2.95619e+07	0.0172449	2.52374e+07	2.55436e+07	2.49228e+07	2.52346e+07	0.0100435	2.98352e+07	2.82492e+07	2.81877e+07	2.87574e+07	0.0265175
P05413	FABP3	Fatty acid-binding protein, heart	6	6	1.71025	0.00214313	+	24.7695	24.6375	25.0813	26.3943	26.9428	26.2821	2.70609e+07	2.90593e+07	2.97864e+07	2.86355e+07	0.0402409	2.53563e+07	2.7053e+07	2.57808e+07	2.60634e+07	0.0276601	3.40819e+07	3.5942e+07	3.64939e+07	3.55059e+07	0.0290611	9.05893e+07	8.72325e+07	8.67042e+07	8.81753e+07	0.0195124	1.27084e+08	1.31978e+08	1.28607e+08	1.29223e+08	0.0158251	7.71342e+07	8.25034e+07	8.51535e+07	8.1597e+07	0.040884
P16402	H1-3	Histone H1.3	4	4	-2.17118	0.00216653	+	23.9299	24.5608	24.1709	21.7917	21.8099	22.5465	1.62005e+07	1.60185e+07	1.57255e+07	1.59815e+07	0.012244	2.41821e+07	2.47169e+07	2.53467e+07	2.47486e+07	0.0192324	1.9329e+07	1.89533e+07	1.83798e+07	1.88874e+07	0.0206653	4.41616e+06	3.05478e+06	3.42053e+06	3.63049e+06	0.158455	4.50781e+06	3.32849e+06	3.19293e+06	3.67641e+06	0.160614	5.89415e+06	6.52424e+06	5.95953e+06	6.12597e+06	0.0461768
P35606	COPB2	Coatomer subunit beta'	15	14	-0.606396	0.00221747	+	25.8349	25.8358	25.6932	25.2747	25.038	25.232	6.26412e+07	6.22173e+07	5.46972e+07	5.98519e+07	0.0609674	5.80266e+07	6.0738e+07	6.09046e+07	5.98897e+07	0.0220274	5.22726e+07	5.37363e+07	5.67527e+07	5.42539e+07	0.0343807	3.9121e+07	4.13264e+07	4.13306e+07	4.05927e+07	0.0256364	3.46982e+07	3.39532e+07	3.46981e+07	3.44498e+07	0.0101939	3.86457e+07	3.82242e+07	4.13574e+07	3.94091e+07	0.0352287
P05091	ALDH2	Aldehyde dehydrogenase, mitochondrial	10	10	1.75343	0.00221782	+	24.1488	23.6431	24.3975	25.7363	26.0484	25.6649	1.81131e+07	1.90583e+07	1.87397e+07	1.8637e+07	0.0210682	1.40833e+07	1.29901e+07	1.23495e+07	1.3141e+07	0.0544737	2.09159e+07	2.21547e+07	2.33072e+07	2.2126e+07	0.0441305	5.3144e+07	5.73953e+07	5.70489e+07	5.58627e+07	0.0345067	6.65279e+07	6.94171e+07	7.23718e+07	6.94389e+07	0.0343586	4.93348e+07	5.45582e+07	5.56087e+07	5.31673e+07	0.0516047
Q00341	HDLBP	Vigilin	26	25	-0.418992	0.00226337	+	28.3242	28.3613	28.1899	27.889	27.8138	27.9157	3.36411e+08	3.34316e+08	3.37518e+08	3.36082e+08	0.00395135	3.40221e+08	3.50125e+08	3.44166e+08	3.44838e+08	0.0118058	2.95161e+08	3.06978e+08	3.16439e+08	3.06193e+08	0.0284285	2.49891e+08	2.49909e+08	2.45863e+08	2.48554e+08	0.00765642	2.35401e+08	2.39791e+08	2.32592e+08	2.35928e+08	0.0125557	2.4683e+08	2.58233e+08	2.54541e+08	2.53202e+08	0.0187625
P21291	CSRP1	Cysteine and glycine-rich protein 1	5	5	-0.627239	0.0022701	+	25.7283	25.5844	25.4652	25.0506	24.8811	24.9644	5.86753e+07	5.58873e+07	5.22025e+07	5.55884e+07	0.0476894	5.17896e+07	5.10771e+07	4.80653e+07	5.03107e+07	0.0320828	4.74451e+07	4.7298e+07	4.42228e+07	4.6322e+07	0.0320703	3.84249e+07	3.40476e+07	3.1785e+07	3.47525e+07	0.0793081	3.50337e+07	2.97571e+07	2.79072e+07	3.08993e+07	0.0977176	3.23667e+07	3.27329e+07	3.31125e+07	3.27374e+07	0.00930011
P48735	IDH2	Isocitrate dehydrogenase [NADP], mitochondrial	14	13	-0.457982	0.00228062	+	27.2147	27.2189	27.1648	26.6215	26.8392	26.7637	1.57005e+08	1.56847e+08	1.53404e+08	1.55752e+08	0.010666	1.50165e+08	1.57616e+08	1.60829e+08	1.56204e+08	0.0285938	1.48334e+08	1.48207e+08	1.54833e+08	1.50458e+08	0.0205653	1.03806e+08	1.02732e+08	1.03205e+08	1.03248e+08	0.0042569	1.2261e+08	1.21981e+08	1.15585e+08	1.20059e+08	0.0264366	1.07887e+08	1.13798e+08	1.20127e+08	1.13937e+08	0.0438674
Q14554	PDIA5	Protein disulfide-isomerase A5	18	18	-0.44604	0.00229719	+	26.3791	26.5093	26.5824	26.083	26.0523	25.9974	8.841e+07	8.94712e+07	8.39511e+07	8.72774e+07	0.0274028	9.16963e+07	1.0183e+08	9.3035e+07	9.55206e+07	0.0470587	1.00301e+08	9.9053e+07	1.02108e+08	1.00487e+08	0.0124817	7.60065e+07	6.84621e+07	6.87867e+07	7.10851e+07	0.0489905	7.00478e+07	7.09918e+07	6.77152e+07	6.95849e+07	0.0197907	6.54322e+07	6.66247e+07	6.89092e+07	6.69887e+07	0.0215354
Q9Y4Z0	LSM4	U6 snRNA-associated Sm-like protein LSm4	3	3	0.49169	0.00231805	+	22.0691	22.1519	22.0359	22.5545	22.4825	22.695	4.72805e+06	4.07948e+06	4.38284e+06	4.39679e+06	0.0602623	4.46291e+06	4.86367e+06	4.64247e+06	4.65635e+06	0.0352001	3.91607e+06	4.41136e+06	4.56887e+06	4.29877e+06	0.064702	6.10919e+06	6.28246e+06	6.07588e+06	6.15584e+06	0.014711	5.91247e+06	5.81884e+06	5.84393e+06	5.85842e+06	0.00675454	5.9555e+06	7.30051e+06	7.1161e+06	6.7907e+06	0.0876719
Q96AY3	FKBP10	Peptidyl-prolyl cis-trans isomerase FKBP10	23	21	-0.829738	0.00241296	+	27.9491	28.0365	27.6407	27.0217	27.0845	27.031	2.59841e+08	2.59206e+08	2.58356e+08	2.59134e+08	0.00234784	2.78627e+08	2.72409e+08	2.74881e+08	2.75306e+08	0.00928409	2.05542e+08	2.06988e+08	2.15256e+08	2.09262e+08	0.0204496	1.30259e+08	1.37345e+08	1.41139e+08	1.36248e+08	0.0330942	1.39582e+08	1.37633e+08	1.49715e+08	1.4231e+08	0.0372161	1.33959e+08	1.39942e+08	1.37493e+08	1.37132e+08	0.0179079
P14625	HSP90B1	Endoplasmin	43	41	-0.34192	0.00243858	+	30.4935	30.6375	30.6286	30.2103	30.2755	30.2481	1.49218e+09	1.51927e+09	1.5237e+09	1.51172e+09	0.00921812	1.66595e+09	1.68014e+09	1.66502e+09	1.67037e+09	0.00414157	1.67165e+09	1.62952e+09	1.67901e+09	1.66006e+09	0.0131335	1.26583e+09	1.22106e+09	1.23996e+09	1.24228e+09	0.0147723	1.31895e+09	1.27663e+09	1.30339e+09	1.29966e+09	0.0134479	1.2371e+09	1.28774e+09	1.30073e+09	1.27519e+09	0.0215288
P14324	FDPS	Farnesyl pyrophosphate synthase	8	8	0.884123	0.00245943	+	23.417	23.6865	23.4425	24.275	24.5926	24.3307	1.20062e+07	1.02745e+07	1.1302e+07	1.11943e+07	0.0635189	1.37118e+07	1.45839e+07	1.23233e+07	1.35397e+07	0.0687531	1.20984e+07	1.06293e+07	1.13962e+07	1.13746e+07	0.0527441	2.1826e+07	1.96757e+07	1.95434e+07	2.03484e+07	0.051416	2.61131e+07	2.44853e+07	2.51841e+07	2.52608e+07	0.0263951	2.2164e+07	1.99001e+07	2.13289e+07	2.1131e+07	0.0442383
Q9NZR1	TMOD2	Tropomodulin-2	3	3	0.875442	0.00246132	+	20.895	21.0886	21.0625	22.1111	21.8307	21.7307	2.14453e+06	1.47924e+06	2.23029e+06	1.95135e+06	0.172018	2.03387e+06	2.49363e+06	2.15736e+06	2.22829e+06	0.087189	2.1114e+06	2.41129e+06	2.04182e+06	2.18817e+06	0.0732613	4.7539e+06	4.43429e+06	4.40622e+06	4.53147e+06	0.0348006	3.71394e+06	3.56842e+06	3.90408e+06	3.72881e+06	0.0368575	3.85431e+06	3.18121e+06	3.39325e+06	3.47626e+06	0.080832
Q07020	RPL18	60S ribosomal protein L18	2	2	-0.337987	0.00246274	+	26.9505	26.8875	26.946	26.6723	26.5152	26.5825	1.41146e+08	1.23575e+08	1.24351e+08	1.29691e+08	0.062505	1.36576e+08	1.22348e+08	1.13512e+08	1.24145e+08	0.076534	1.31523e+08	1.24276e+08	1.32052e+08	1.29284e+08	0.0274384	1.09083e+08	1.04348e+08	1.07397e+08	1.06942e+08	0.0183219	9.96757e+07	9.31307e+07	9.49348e+07	9.59137e+07	0.0287776	9.7051e+07	9.98666e+07	1.04549e+08	1.00489e+08	0.0307737
Q9H3P7	ACBD3	Golgi resident protein GCP60	5	5	-0.550002	0.00248383	+	23.4037	23.4047	23.19	22.7206	22.8539	22.774	1.07489e+07	9.80565e+06	1.27383e+07	1.10976e+07	0.110147	1.09981e+07	1.08904e+07	1.14266e+07	1.11051e+07	0.0208528	1.03511e+07	8.59563e+06	9.76138e+06	9.56936e+06	0.0762227	6.84192e+06	6.76592e+06	7.12673e+06	6.91152e+06	0.0224704	8.14589e+06	6.94908e+06	7.64671e+06	7.58056e+06	0.0647486	6.14821e+06	7.60043e+06	7.76822e+06	7.17229e+06	0.101413
P46459	NSF	Vesicle-fusing ATPase	16	15	-0.487676	0.00251701	+	25.2664	25.1705	25.1033	24.6889	24.7888	24.5996	4.11186e+07	4.09488e+07	3.90148e+07	4.03607e+07	0.0236432	3.65705e+07	3.86193e+07	3.81002e+07	3.77633e+07	0.0230297	3.79841e+07	3.41503e+07	3.60021e+07	3.60455e+07	0.04343	2.79094e+07	2.57999e+07	2.74256e+07	2.7045e+07	0.0333612	3.01454e+07	2.74565e+07	2.93508e+07	2.89842e+07	0.0389153	2.6382e+07	2.51938e+07	2.46913e+07	2.54224e+07	0.0278853
Q9BXX0	EMILIN2	EMILIN-2	7	7	2.86537	0.00255431	+	20.6886	21.3752	20.9316	23.6096	24.604	23.3778	1.56239e+06	1.61833e+06	1.87802e+06	1.68625e+06	0.0815507	2.70815e+06	2.6486e+06	2.81594e+06	2.72423e+06	0.0254226	2.1742e+06	1.83221e+06	1.99708e+06	2.00116e+06	0.069782	1.31945e+07	1.31418e+07	1.22056e+07	1.28473e+07	0.0353599	2.64275e+07	2.42666e+07	2.59185e+07	2.55375e+07	0.0361194	9.84676e+06	1.14465e+07	1.14947e+07	1.09293e+07	0.0700612
Q96IU4	ABHD14B	Alpha/beta hydrolase domain-containing protein 14B	5	5	-0.433239	0.00256728	+	24.1052	24.2226	24.0685	23.6609	23.6475	23.7881	1.81607e+07	1.75285e+07	1.84481e+07	1.80458e+07	0.0212851	1.95434e+07	1.855e+07	2.06352e+07	1.95762e+07	0.0435024	1.80338e+07	1.70772e+07	1.76663e+07	1.75924e+07	0.0223982	1.27911e+07	1.31881e+07	1.3809e+07	1.32627e+07	0.0315873	1.37179e+07	1.31361e+07	1.25674e+07	1.31405e+07	0.0357427	1.37159e+07	1.54717e+07	1.42688e+07	1.44855e+07	0.0506013
Q687X5	STEAP4	Metalloreductase STEAP4	10	8	1.97596	0.0025862	+	24.5404	25.1449	25.3811	27.3066	26.8858	26.8019	2.59952e+07	2.3665e+07	2.34856e+07	2.43819e+07	0.0468828	3.64159e+07	3.76417e+07	3.72682e+07	3.71086e+07	0.0138236	4.25448e+07	4.34908e+07	4.51564e+07	4.37307e+07	0.024688	1.59105e+08	1.71334e+08	1.67799e+08	1.66079e+08	0.0309404	1.22424e+08	1.23329e+08	1.25912e+08	1.23888e+08	0.011932	1.14505e+08	1.15518e+08	1.2059e+08	1.16871e+08	0.0227794
P39019	RPS19	40S ribosomal protein S19	5	4	-0.29804	0.0026368		26.7267	26.6602	26.5854	26.3946	26.3504	26.3332	1.11041e+08	1.11144e+08	1.10986e+08	1.11057e+08	0.000587115	1.01664e+08	1.10177e+08	1.06319e+08	1.06053e+08	0.0328164	1.01768e+08	9.78187e+07	1.02489e+08	1.00692e+08	0.0203875	9.31338e+07	8.33982e+07	8.81262e+07	8.82194e+07	0.0450593	9.19107e+07	8.4519e+07	8.02421e+07	8.55573e+07	0.0563359	8.2805e+07	8.43951e+07	8.64348e+07	8.4545e+07	0.017572
Q12857	NFIA	Nuclear factor 1 A-type	3	2	0.775261	0.00265926	+	21.5451	21.5545	21.6929	22.417	22.5309	22.1704	3.23013e+06	3.0936e+06	2.8573e+06	3.06035e+06	0.0503249	3.35372e+06	3.00794e+06	2.87746e+06	3.07971e+06	0.0652488	3.20281e+06	2.98363e+06	3.97681e+06	3.38775e+06	0.125756	4.64133e+06	6.22419e+06	5.94685e+06	5.60412e+06	0.12315	5.29699e+06	7.21738e+06	5.674e+06	6.06279e+06	0.137033	5.14297e+06	4.52809e+06	4.48169e+06	4.71758e+06	0.063886
P02452	COL1A1	Collagen alpha-1(I) chain	26	26	-2.5541	0.00275807	+	28.4549	29.0459	27.8086	25.6681	25.8044	26.1745	3.80516e+08	3.71403e+08	3.51894e+08	3.67938e+08	0.0324495	5.45069e+08	5.63772e+08	5.53832e+08	5.54224e+08	0.013786	2.40173e+08	2.36958e+08	2.28099e+08	2.35076e+08	0.0217192	5.61135e+07	5.03435e+07	5.34918e+07	5.33163e+07	0.0442423	6.15375e+07	5.75595e+07	5.67038e+07	5.86003e+07	0.0359404	7.44503e+07	7.55653e+07	7.72037e+07	7.57398e+07	0.0149304
P07951	TPM2	Tropomyosin beta chain	13	2	-2.95975	0.00275945	+	19.4366	18.8607	18.3268	15.689	15.5177	16.5382	799510	751332	577926	709589	0.134099	565616	459732	402746	476031	0.141761	427427	299733	259219	328793	0.218007	39176.9	47561.3	71744.4	52827.6	0.261365	73928.2	33759.6	33049.5	46912.4	0.407253	134527	65401	85580	95169.2	0.304968
Q969H8	MYDGF	UPF0556 protein C19orf10	4	4	-0.38065	0.00278163	+	25.5189	25.5135	25.6504	25.107	25.2111	25.2227	4.87223e+07	4.82133e+07	4.72964e+07	4.80773e+07	0.0122724	4.78661e+07	4.88742e+07	4.69551e+07	4.78985e+07	0.0163645	5.46546e+07	5.03581e+07	5.29939e+07	5.26689e+07	0.0335883	4.01891e+07	3.52112e+07	3.30121e+07	3.61375e+07	0.0830804	4.63563e+07	3.74292e+07	3.2743e+07	3.88428e+07	0.145375	4.01333e+07	3.83847e+07	3.89467e+07	3.91549e+07	0.0186153
O00151	PDLIM1	PDZ and LIM domain protein 1	11	11	-0.927114	0.0028494	+	26.006	26.3397	25.97	25.2633	25.252	25.0191	6.75393e+07	6.80882e+07	6.65368e+07	6.73881e+07	0.00953143	8.23853e+07	8.34384e+07	8.89575e+07	8.49271e+07	0.0339369	6.346e+07	6.45991e+07	6.91202e+07	6.57264e+07	0.0371907	4.3348e+07	3.83956e+07	3.90706e+07	4.02714e+07	0.0544517	4.12697e+07	3.96668e+07	3.89411e+07	3.99592e+07	0.0243463	3.33792e+07	3.38873e+07	3.47358e+07	3.40008e+07	0.0164587
P60900	PSMA6	Proteasome subunit alpha type-6	6	6	-0.432785	0.00290722	+	24.6852	24.5626	24.5	24.0727	24.187	24.1898	2.78181e+07	2.63513e+07	2.67618e+07	2.69771e+07	0.0229042	2.353e+07	2.61328e+07	2.46745e+07	2.47791e+07	0.0429873	2.35629e+07	2.19058e+07	2.57106e+07	2.37264e+07	0.0656482	1.86006e+07	1.78532e+07	1.64791e+07	1.76443e+07	0.0497963	2.08013e+07	1.91156e+07	1.73788e+07	1.90986e+07	0.0731629	1.91414e+07	1.66869e+07	2.15814e+07	1.91366e+07	0.104416
O14980	XPO1	Exportin-1	6	6	0.404908	0.00295775	+	23.632	23.5754	23.4923	24.0275	23.8764	24.0105	1.17062e+07	1.26421e+07	1.47296e+07	1.3026e+07	0.0970199	1.17534e+07	1.25337e+07	1.32348e+07	1.25073e+07	0.0483766	1.05919e+07	1.11004e+07	1.35906e+07	1.1761e+07	0.111409	1.59708e+07	1.8355e+07	1.70766e+07	1.71341e+07	0.0568587	1.40559e+07	1.49223e+07	1.72655e+07	1.54146e+07	0.0879523	1.80746e+07	1.6896e+07	1.55931e+07	1.68546e+07	0.0601311
Q02539	H1-1	Histone H1.1	2	2	1.15086	0.00296046	+	22.0918	22.0756	22.2185	22.9441	23.3778	23.5165	4.89317e+06	4.3699e+06	4.13744e+06	4.46683e+06	0.0707542	4.24529e+06	4.45946e+06	4.55704e+06	4.4206e+06	0.029454	4.85562e+06	4.81697e+06	4.96825e+06	4.88028e+06	0.0131494	8.8409e+06	7.53666e+06	7.82858e+06	8.06872e+06	0.0692642	1.08177e+07	1.12001e+07	1.06433e+07	1.0887e+07	0.0213594	1.23522e+07	1.21077e+07	1.15284e+07	1.19961e+07	0.0287978
Q9NR12	PDLIM7	PDZ and LIM domain protein 7	6	5	-1.60399	0.00299732	+	23.299	23.2845	22.6742	21.6907	21.2149	21.5402	1.01873e+07	1.11058e+07	9.66903e+06	1.03207e+07	0.0575622	1.08351e+07	1.01309e+07	9.68577e+06	1.02173e+07	0.046311	7.27975e+06	6.93833e+06	5.86128e+06	6.69312e+06	0.090315	3.85238e+06	3.38471e+06	2.91794e+06	3.38501e+06	0.112698	2.50572e+06	2.71483e+06	2.08146e+06	2.434e+06	0.108256	2.90895e+06	2.88361e+06	3.35617e+06	3.04958e+06	0.0711714
O95865	DDAH2	N(G),N(G)-dimethylarginine dimethylaminohydrolase 2	5	5	0.546199	0.00310506	+	25.6944	25.6292	25.7286	26.2571	26.3545	26.0793	5.92297e+07	5.31081e+07	5.05739e+07	5.43039e+07	0.0669098	5.2783e+07	5.13503e+07	5.15833e+07	5.19055e+07	0.012093	5.75315e+07	5.42606e+07	5.49416e+07	5.55779e+07	0.0253536	7.78704e+07	8.07767e+07	8.19118e+07	8.01863e+07	0.0212245	8.12571e+07	8.45939e+07	9.15951e+07	8.58154e+07	0.0502003	6.8838e+07	7.12102e+07	7.26077e+07	7.08853e+07	0.0219514
Q01484	ANK2	Ankyrin-2	4	3	1.973	0.00311049	+	20.714	20.5545	21.5213	22.8913	22.7715	23.0459	1.3881e+06	1.81237e+06	1.95645e+06	1.71897e+06	0.140342	1.23331e+06	1.64517e+06	1.74248e+06	1.54032e+06	0.143278	3.17396e+06	2.92132e+06	2.94117e+06	3.01215e+06	0.0380814	7.14048e+06	7.94982e+06	8.25836e+06	7.78289e+06	0.0605677	7.05246e+06	6.94185e+06	7.48421e+06	7.15951e+06	0.0326835	8.23623e+06	8.89845e+06	8.85272e+06	8.66247e+06	0.03486
P13693	TPT1	Translationally-controlled tumor protein	4	4	-0.823394	0.00312579	+	24.9901	24.7553	24.5605	23.9655	23.8747	23.9954	3.33717e+07	3.41804e+07	3.24205e+07	3.33242e+07	0.0215834	2.82013e+07	2.75583e+07	2.91995e+07	2.83197e+07	0.023843	2.36656e+07	2.59848e+07	2.45761e+07	2.47422e+07	0.0385611	1.61421e+07	1.51699e+07	1.78306e+07	1.63809e+07	0.0671071	1.43275e+07	1.57453e+07	1.60727e+07	1.53818e+07	0.049241	1.73642e+07	1.70931e+07	1.5715e+07	1.67241e+07	0.0431773
Q9Y673	ALG5	Dolichyl-phosphate beta-glucosyltransferase	5	4	-0.423059	0.00313635	+	23.2264	23.2624	23.1514	22.8002	22.8854	22.6853	1.03091e+07	9.25686e+06	9.87495e+06	9.81363e+06	0.043995	9.60116e+06	1.04778e+07	1.01058e+07	1.00616e+07	0.0357046	9.13366e+06	9.6211e+06	9.19503e+06	9.3166e+06	0.0232669	7.3937e+06	7.73038e+06	6.7868e+06	7.30362e+06	0.0534587	7.23108e+06	7.15491e+06	8.85776e+06	7.74792e+06	0.101369	5.8622e+06	7.27525e+06	7.09698e+06	6.74481e+06	0.0931571
P21980	TGM2	Protein-glutamine gamma-glutamyltransferase 2	8	8	-1.58162	0.00314874	+	23.6874	23.7761	24.1337	22.6925	22.1514	22.0084	1.4766e+07	1.35503e+07	1.221e+07	1.35088e+07	0.0772763	1.54471e+07	1.44612e+07	1.31891e+07	1.43658e+07	0.0643394	1.80669e+07	1.74975e+07	1.96544e+07	1.84063e+07	0.0495846	6.01223e+06	7.01322e+06	7.31025e+06	6.77857e+06	0.0819177	4.17129e+06	4.32795e+06	5.47578e+06	4.65834e+06	0.124839	4.53045e+06	4.02514e+06	4.10095e+06	4.21885e+06	0.0527388
P42224	STAT1	Signal transducer and activator of transcription 1-alpha/beta	26	23	-1.24788	0.00316124	+	27.5665	27.3715	27.4202	26.4382	25.8334	26.3431	1.99066e+08	1.98544e+08	1.98704e+08	1.98771e+08	0.00109849	1.76408e+08	1.76715e+08	1.67793e+08	1.73639e+08	0.0238177	1.80614e+08	1.77174e+08	1.8101e+08	1.79599e+08	0.00959188	8.52731e+07	9.18592e+07	9.56395e+07	9.0924e+07	0.0471099	5.65963e+07	6.03862e+07	6.23867e+07	5.97897e+07	0.0401613	8.70115e+07	8.37994e+07	8.45602e+07	8.51237e+07	0.0161009
O00625	PIR	Pirin	2	2	-1.11221	0.00322455	+	17.7602	18.0644	17.8422	16.6257	16.6257	17.0787	254915	215269	195811	221998	0.110784	407396	221478	193472	274115	0.346331	211306	270405	223239	234983	0.108588	99675.9	102539	101143	101119	0.0115594	140391	90992.9	71980.6	101121	0.285123	140803	131854	142617	138425	0.0339878
P49257	LMAN1	Protein ERGIC-53	14	13	-0.606201	0.00323984	+	27.4943	27.3872	27.1962	26.769	26.814	26.6761	1.98759e+08	1.8452e+08	1.8393e+08	1.89069e+08	0.0362594	1.64872e+08	1.79991e+08	1.81759e+08	1.7554e+08	0.0431723	1.46805e+08	1.53615e+08	1.6089e+08	1.5377e+08	0.0374001	1.22381e+08	1.11461e+08	1.09236e+08	1.14359e+08	0.0502324	1.17656e+08	1.17886e+08	1.18417e+08	1.17986e+08	0.00269938	1.03375e+08	1.06242e+08	1.12072e+08	1.0723e+08	0.0337436
P50897	PPT1	Palmitoyl-protein thioesterase 1	4	4	-1.12824	0.00330001	+	22.2636	22.788	22.3485	21.3063	21.2238	21.4852	4.53095e+06	3.9437e+06	6.6305e+06	5.03505e+06	0.229064	7.25435e+06	7.18511e+06	7.28789e+06	7.24245e+06	0.005909	4.38247e+06	5.87706e+06	5.76131e+06	5.34028e+06	0.127132	2.77297e+06	2.67527e+06	2.33157e+06	2.59327e+06	0.072996	2.65586e+06	2.69139e+06	2.00007e+06	2.4491e+06	0.129782	2.85783e+06	2.91659e+06	3.03231e+06	2.93557e+06	0.0246925
O00499	BIN1	Myc box-dependent-interacting protein 1	5	5	1.4524	0.00339778	+	21.2535	20.4972	21.0559	22.48	22.3988	22.2849	2.60224e+06	2.59667e+06	2.30042e+06	2.49978e+06	0.056398	1.50314e+06	1.67396e+06	1.25877e+06	1.47862e+06	0.115231	2.05514e+06	2.25928e+06	2.23175e+06	2.18206e+06	0.0414504	5.32261e+06	6.2933e+06	5.91918e+06	5.84503e+06	0.0683896	5.74955e+06	6.02995e+06	4.79777e+06	5.52576e+06	0.0954324	5.30509e+06	5.22451e+06	4.78853e+06	5.10604e+06	0.04444
Q92743	HTRA1	Serine protease HTRA1	10	9	-0.887933	0.00344817	+	25.5528	25.6969	25.8751	24.67	24.7591	25.0319	4.79571e+07	4.85532e+07	5.11582e+07	4.92228e+07	0.0282382	5.37506e+07	5.56895e+07	5.37421e+07	5.43941e+07	0.0168404	6.17634e+07	6.07834e+07	6.20771e+07	6.15413e+07	0.00895326	2.72046e+07	2.76992e+07	2.51791e+07	2.66943e+07	0.0408413	2.93307e+07	2.7908e+07	2.79465e+07	2.8395e+07	0.0233074	3.35229e+07	3.51439e+07	3.42441e+07	3.43036e+07	0.0193305
Q2M389	WASHC4	WASH complex subunit 7	4	4	0.294647	0.00352841		22.9899	23.0658	22.9777	23.3778	23.2961	23.2434	7.25372e+06	9.36041e+06	8.38139e+06	8.33184e+06	0.103311	9.28977e+06	8.56827e+06	8.46937e+06	8.7758e+06	0.0416671	7.52122e+06	8.82968e+06	8.42956e+06	8.26015e+06	0.0662755	9.59001e+06	1.17984e+07	1.13822e+07	1.09236e+07	0.0877138	8.53067e+06	1.12381e+07	1.10722e+07	1.02803e+07	0.120527	9.81064e+06	9.55934e+06	1.04124e+07	9.92747e+06	0.0360553
O95777	LSM8	U6 snRNA-associated Sm-like protein LSm8	2	2	0.436535	0.00359145	+	21.3266	21.4324	21.2989	21.8073	21.68	21.8802	2.57415e+06	2.71256e+06	2.59157e+06	2.62609e+06	0.0234379	2.75632e+06	2.92701e+06	2.79767e+06	2.827e+06	0.0257181	2.72148e+06	2.49095e+06	2.51872e+06	2.57705e+06	0.0398724	3.92494e+06	3.61521e+06	3.46837e+06	3.6695e+06	0.0518622	3.72766e+06	3.36892e+06	2.97849e+06	3.35836e+06	0.0910982	3.92045e+06	3.78301e+06	3.87182e+06	3.85842e+06	0.0147485
P19823	ITIH2	Inter-alpha-trypsin inhibitor heavy chain H2	4	4	0.732387	0.00359533	+	23.7995	23.5869	23.5522	24.317	24.558	24.2607	1.4397e+07	1.42707e+07	1.49969e+07	1.45548e+07	0.0217642	1.35853e+07	1.34592e+07	1.08078e+07	1.26174e+07	0.101497	1.28004e+07	1.20737e+07	1.18937e+07	1.22559e+07	0.0319821	2.04961e+07	2.29189e+07	1.92775e+07	2.08975e+07	0.0724217	2.56298e+07	2.41316e+07	2.44852e+07	2.47489e+07	0.0258369	1.87877e+07	2.11769e+07	2.0377e+07	2.01138e+07	0.0493672
P13667	PDIA4	Protein disulfide-isomerase A4	26	26	-0.305148	0.00359628		27.8546	27.9306	28.0174	27.6524	27.5973	27.6374	2.41253e+08	2.44874e+08	2.41987e+08	2.42705e+08	0.0064393	2.51946e+08	2.56547e+08	2.58981e+08	2.55825e+08	0.0114024	2.71029e+08	2.69009e+08	2.75016e+08	2.71685e+08	0.00918721	2.11096e+08	2.07954e+08	2.13844e+08	2.10965e+08	0.0114062	2.00269e+08	2.05856e+08	2.03038e+08	2.03054e+08	0.0112336	2.01498e+08	2.11782e+08	2.13057e+08	2.08779e+08	0.0247853
Q9UBS4	DNAJB11	DnaJ homolog subfamily B member 11	8	8	-0.379685	0.00361255	+	25.3123	25.1396	25.1762	24.8922	24.7801	24.8167	4.29285e+07	4.04465e+07	4.16165e+07	4.16639e+07	0.0243334	3.5988e+07	3.85846e+07	3.63182e+07	3.69636e+07	0.031223	3.8953e+07	3.53371e+07	3.94482e+07	3.79128e+07	0.0483343	3.11919e+07	3.10898e+07	3.1136e+07	3.11393e+07	0.00134077	3.20381e+07	2.67764e+07	2.76176e+07	2.88107e+07	0.0801021	2.94424e+07	3.09991e+07	2.82106e+07	2.95507e+07	0.0386112
P08123	COL1A2	Collagen alpha-2(I) chain	26	24	-1.91325	0.00361371	+	28.0513	28.596	27.5934	26.0661	26.0335	26.4012	2.80881e+08	2.75481e+08	2.78081e+08	2.78148e+08	0.00792656	3.87322e+08	4.2395e+08	4.05937e+08	4.05736e+08	0.0368561	2.01693e+08	2.00566e+08	2.0526e+08	2.02506e+08	0.00987953	7.44385e+07	6.69307e+07	6.93996e+07	7.02562e+07	0.0444708	6.80038e+07	6.86799e+07	6.93757e+07	6.86865e+07	0.0081541	8.45555e+07	9.1301e+07	9.00247e+07	8.86271e+07	0.0330124
P08294	SOD3	Extracellular superoxide dismutase [Cu-Zn]	5	5	1.27722	0.00371168	+	22.3266	21.6757	22.019	23.2679	23.4551	23.1301	4.85027e+06	5.78501e+06	5.1369e+06	5.25739e+06	0.074372	2.90157e+06	3.26298e+06	3.88576e+06	3.3501e+06	0.121337	4.47958e+06	4.14179e+06	4.13057e+06	4.25065e+06	0.0380996	1.02049e+07	9.76302e+06	1.02825e+07	1.00835e+07	0.0226895	1.09532e+07	1.21815e+07	1.12307e+07	1.14552e+07	0.0459158	8.50568e+06	9.33471e+06	9.70782e+06	9.18273e+06	0.0547111
P54886	ALDH18A1	Delta-1-pyrroline-5-carboxylate synthase	18	18	-0.625738	0.00375352	+	25.3118	25.5682	25.543	24.8037	24.9737	24.7684	4.07808e+07	4.14169e+07	4.27497e+07	4.16491e+07	0.0196982	4.99304e+07	4.96749e+07	4.96467e+07	4.97507e+07	0.00256499	4.91867e+07	4.75828e+07	4.98956e+07	4.88884e+07	0.0197889	2.94172e+07	2.92961e+07	2.91416e+07	2.92849e+07	0.00385109	3.30107e+07	3.4016e+07	3.18209e+07	3.29492e+07	0.0272292	2.94647e+07	2.79274e+07	2.83402e+07	2.85774e+07	0.0227325
P18754	RCC1	Regulator of chromosome condensation	10	10	0.632841	0.00382908	+	24.5225	24.7182	24.8717	25.391	25.2926	25.3273	2.37494e+07	2.48762e+07	2.3681e+07	2.41022e+07	0.0227378	2.68485e+07	2.72802e+07	2.87194e+07	2.7616e+07	0.0289641	3.16729e+07	2.81584e+07	3.21305e+07	3.06539e+07	0.0578881	4.41532e+07	4.49206e+07	4.29875e+07	4.40204e+07	0.0180535	4.2385e+07	4.1536e+07	3.92524e+07	4.10578e+07	0.0322185	3.90815e+07	4.40405e+07	4.3072e+07	4.20646e+07	0.0510204
O75110	ATP9A	Probable phospholipid-transporting ATPase IIA	2	2	1.86179	0.00385366	+	17.2967	18.1357	18.0211	19.5713	20.002	19.4656	156528	169366	157188	161027	0.0366541	266694	309612	287628	287978	0.0608484	254403	148877	393837	265706	0.377573	887602	824979	625416	779332	0.143453	778134	1.0801e+06	1.28763e+06	1.04862e+06	0.19949	671479	661486	839368	724111	0.112692
Q9Y3B3	TMED7	Transmembrane emp24 domain-containing protein 7	5	4	-0.359931	0.00387598	+	24.2641	24.1423	24.1207	23.7492	23.8105	23.8876	2.17556e+07	2.0546e+07	1.81416e+07	2.01478e+07	0.0745508	1.64639e+07	1.98284e+07	1.92578e+07	1.85167e+07	0.0793945	1.65886e+07	1.86107e+07	1.95244e+07	1.82412e+07	0.0672487	1.50351e+07	1.30943e+07	1.41717e+07	1.41004e+07	0.0563059	1.62502e+07	1.46469e+07	1.32395e+07	1.47122e+07	0.0836037	1.44206e+07	1.57537e+07	1.6385e+07	1.55198e+07	0.052761
P00966	ASS1	Argininosuccinate synthase	10	9	-1.74595	0.00389629	+	25.427	26.0723	25.6735	24.421	23.7179	23.7961	4.21735e+07	4.59043e+07	4.72601e+07	4.51126e+07	0.0476746	6.50863e+07	7.50296e+07	7.1552e+07	7.0556e+07	0.0583932	5.22607e+07	5.56351e+07	5.26515e+07	5.35158e+07	0.0281608	2.02366e+07	2.40213e+07	2.31279e+07	2.24619e+07	0.071912	1.25533e+07	1.49169e+07	1.39209e+07	1.37971e+07	0.0702248	1.32089e+07	1.43351e+07	1.61532e+07	1.45658e+07	0.0832791
O94885	SASH1	SAM and SH3 domain-containing protein 1	2	2	-1.90719	0.00389742	+	22.3828	21.3192	21.8434	19.7854	20.0715	19.967	5.65629e+06	5.24451e+06	5.50513e+06	5.46864e+06	0.0310997	2.7189e+06	2.63605e+06	2.49459e+06	2.61651e+06	0.0353937	3.72673e+06	3.71667e+06	3.84545e+06	3.76295e+06	0.0155416	1.07126e+06	711587	928117	903656	0.163615	1.24381e+06	986696	1.07495e+06	1.10182e+06	0.0968161	1.10189e+06	986550	986082	1.02484e+06	0.0531611
P78536	ADAM17	Disintegrin and metalloproteinase domain-containing protein 17	2	2	0.368684	0.00393539	+	21.5213	21.5915	21.5869	22.0459	21.9061	21.8538	3.29631e+06	2.55931e+06	3.1779e+06	3.01117e+06	0.107317	2.86721e+06	3.53955e+06	3.06016e+06	3.15564e+06	0.0895733	2.90686e+06	3.22925e+06	3.31278e+06	3.14963e+06	0.0555682	4.21662e+06	4.11636e+06	4.66543e+06	4.3328e+06	0.0550998	3.63155e+06	4.2219e+06	3.93974e+06	3.93106e+06	0.0613286	3.74924e+06	3.99685e+06	3.63822e+06	3.79477e+06	0.0395037
O75718	CRTAP	Cartilage-associated protein	5	5	-0.815051	0.00399053	+	24.5971	24.4841	24.2474	23.7715	23.6501	23.4619	2.44871e+07	2.70701e+07	2.45795e+07	2.53789e+07	0.0471433	2.35738e+07	2.22372e+07	2.45908e+07	2.34673e+07	0.0410689	1.9407e+07	1.93848e+07	2.0954e+07	1.99153e+07	0.036884	1.33823e+07	1.46563e+07	1.492e+07	1.43195e+07	0.0468886	1.2591e+07	1.37196e+07	1.31824e+07	1.31643e+07	0.0350119	1.24778e+07	1.05148e+07	1.16694e+07	1.1554e+07	0.0697193
P51610	HCFC1	Host cell factor 1	7	7	0.519936	0.00405033	+	23.0443	23.1095	23.0886	23.5404	23.7695	23.4923	7.70777e+06	9.26161e+06	8.96592e+06	8.6451e+06	0.0779284	9.98123e+06	9.09761e+06	8.05932e+06	9.04605e+06	0.0868294	9.04008e+06	8.19436e+06	9.53951e+06	8.92465e+06	0.0622082	1.14525e+07	1.24699e+07	1.26347e+07	1.21857e+07	0.0429009	1.41957e+07	1.39666e+07	1.4756e+07	1.43061e+07	0.023179	1.25012e+07	1.13236e+07	1.16944e+07	1.18397e+07	0.0415198
P29558	RBMS1	RNA-binding motif, single-stranded-interacting protein 1	3	3	-0.298269	0.00414319		23.7808	23.833	23.8537	23.4474	23.6055	23.5197	1.47757e+07	1.47338e+07	1.37265e+07	1.4412e+07	0.0336527	1.40342e+07	1.54213e+07	1.53742e+07	1.49433e+07	0.0430328	1.61786e+07	1.36864e+07	1.56135e+07	1.51595e+07	0.0703765	1.19519e+07	1.06235e+07	1.174e+07	1.14385e+07	0.0509423	1.31742e+07	1.21939e+07	1.29231e+07	1.27638e+07	0.0325737	1.13811e+07	1.21165e+07	1.25822e+07	1.20266e+07	0.041115
P35611	ADD1	Alpha-adducin	17	15	1.35015	0.00415946	+	25.6513	24.9134	25.4488	26.8142	26.6458	26.604	5.04778e+07	5.49583e+07	5.27327e+07	5.2723e+07	0.034694	3.30447e+07	3.073e+07	3.11643e+07	3.16464e+07	0.0317435	4.65525e+07	4.4924e+07	4.60128e+07	4.58298e+07	0.0147789	1.1456e+08	1.17347e+08	1.2187e+08	1.17926e+08	0.0255439	1.08392e+08	1.04124e+08	1.03595e+08	1.0537e+08	0.0203833	1.05157e+08	9.86879e+07	1.01675e+08	1.0184e+08	0.0259566
O60437	PPL	Periplakin	59	56	1.43665	0.00422975	+	27.965	28.2308	28.5352	29.995	29.6798	29.3662	2.60907e+08	2.58879e+08	2.6642e+08	2.62069e+08	0.0121588	3.17531e+08	3.14999e+08	3.12659e+08	3.15063e+08	0.00631472	3.82584e+08	3.92123e+08	3.92826e+08	3.89178e+08	0.0120031	1.05283e+09	1.09489e+09	1.07638e+09	1.0747e+09	0.0160156	8.43712e+08	8.63938e+08	8.70949e+08	8.59533e+08	0.013435	6.61125e+08	6.96246e+08	7.17792e+08	6.91721e+08	0.0337628
Q13363	CTBP1	C-terminal-binding protein 1	4	3	0.375095	0.00425631	+	21.9847	21.9459	22.0691	22.3129	22.48	22.3321	4.13227e+06	4.06812e+06	4.25768e+06	4.15269e+06	0.0189567	4.30558e+06	4.34843e+06	3.45603e+06	4.03668e+06	0.101805	3.96803e+06	4.43894e+06	4.78683e+06	4.39793e+06	0.076293	5.0958e+06	5.4235e+06	5.1151e+06	5.21146e+06	0.0288089	4.9237e+06	6.45629e+06	6.17387e+06	5.85129e+06	0.113814	5.27573e+06	5.09633e+06	5.45808e+06	5.27671e+06	0.0279884
P27824	CANX	Calnexin	27	26	-0.381797	0.00430885	+	29.1453	29.2359	29.0774	28.7856	28.8437	28.6839	5.98124e+08	5.94859e+08	5.88312e+08	5.93765e+08	0.00687084	6.05366e+08	6.47352e+08	6.44003e+08	6.3224e+08	0.0301345	5.595e+08	5.6965e+08	5.70233e+08	5.66461e+08	0.00869946	4.74395e+08	4.5457e+08	4.59258e+08	4.62741e+08	0.0182825	4.88574e+08	4.78597e+08	4.78029e+08	4.81733e+08	0.0100531	4.23882e+08	4.36428e+08	4.33428e+08	4.31246e+08	0.0124042
Q9HD45	TM9SF3	Transmembrane 9 superfamily member 3	5	5	-0.220642	0.00431955		25.1085	25.1338	25.026	24.8788	24.8961	24.8315	3.61345e+07	3.71395e+07	3.52537e+07	3.61759e+07	0.021296	3.68969e+07	3.86773e+07	3.48743e+07	3.68162e+07	0.0421989	3.57308e+07	3.42092e+07	3.25519e+07	3.4164e+07	0.0379981	2.94667e+07	3.1534e+07	3.15484e+07	3.08497e+07	0.0317009	3.05101e+07	3.11578e+07	3.20039e+07	3.12239e+07	0.0195881	2.82592e+07	3.08745e+07	3.04336e+07	2.98558e+07	0.0382907
Q9BY44	EIF2A	Eukaryotic translation initiation factor 2A	5	5	-0.794237	0.00433104	+	22.6483	22.7568	22.6161	22.0661	21.6304	21.9419	6.91738e+06	6.08126e+06	6.72226e+06	6.57363e+06	0.0543318	6.55145e+06	7.29396e+06	7.41605e+06	7.08715e+06	0.0539098	6.37036e+06	6.18832e+06	6.72701e+06	6.42856e+06	0.0348032	4.46541e+06	3.95367e+06	4.75351e+06	4.39086e+06	0.0753291	2.83476e+06	2.92892e+06	3.97559e+06	3.24642e+06	0.159261	4.29726e+06	3.92629e+06	3.86266e+06	4.02874e+06	0.0475693
Q03169	TNFAIP2	Tumor necrosis factor alpha-induced protein 2	4	4	1.46384	0.00447082	+	20.4067	20.0292	20.4874	22.1856	21.4972	21.632	1.26909e+06	1.48272e+06	1.42684e+06	1.39288e+06	0.0649435	1.05853e+06	1.10571e+06	1.03592e+06	1.06672e+06	0.027254	1.3995e+06	1.43746e+06	1.57175e+06	1.46957e+06	0.050283	4.66594e+06	4.7473e+06	4.90216e+06	4.7718e+06	0.020533	2.85617e+06	2.85305e+06	3.17873e+06	2.96265e+06	0.0515745	3.32663e+06	2.99455e+06	3.43165e+06	3.25094e+06	0.0573056
P61221	ABCE1	ATP-binding cassette sub-family E member 1	5	5	-0.485144	0.00447184	+	23.7219	23.8178	23.5644	23.2908	23.1535	23.2043	1.42169e+07	1.40254e+07	1.32657e+07	1.3836e+07	0.0296899	1.36845e+07	1.55688e+07	1.51063e+07	1.47865e+07	0.0542247	1.09494e+07	1.30218e+07	1.32422e+07	1.24044e+07	0.0832626	1.02048e+07	9.74958e+06	1.08317e+07	1.0262e+07	0.0432297	8.79829e+06	1.06236e+07	8.56986e+06	9.33057e+06	0.0984961	9.38871e+06	9.64087e+06	9.96419e+06	9.66459e+06	0.0243712
P53621	COPA	Coatomer subunit alpha	35	35	-0.503936	0.00451214	+	27.4915	27.6438	27.4696	27.1219	26.8974	27.0737	1.83357e+08	1.89814e+08	1.92921e+08	1.88697e+08	0.0211098	2.10182e+08	2.09604e+08	2.09349e+08	2.09712e+08	0.00166369	1.75403e+08	1.91829e+08	1.90317e+08	1.8585e+08	0.0398853	1.43062e+08	1.46223e+08	1.48878e+08	1.46054e+08	0.0162766	1.18003e+08	1.26786e+08	1.30229e+08	1.25006e+08	0.0411779	1.37517e+08	1.4158e+08	1.44669e+08	1.41255e+08	0.0207334
Q92599	SEPTIN8	Septin-8	6	3	0.824183	0.00452448	+	21.1206	21.1395	20.7307	21.8913	21.7182	21.8538	1.77655e+06	2.8369e+06	2.22739e+06	2.28028e+06	0.190547	1.84522e+06	2.31974e+06	2.77235e+06	2.31244e+06	0.163694	1.62121e+06	1.76963e+06	1.82378e+06	1.73821e+06	0.0492654	4.23462e+06	3.12478e+06	4.31024e+06	3.88988e+06	0.139306	3.13314e+06	3.5376e+06	3.6839e+06	3.45155e+06	0.0674869	3.1098e+06	3.80462e+06	4.44534e+06	3.78659e+06	0.14403
Q9Y394	DHRS7	Dehydrogenase/reductase SDR family member 7	5	5	0.637967	0.0045574	+	23.976	24.1795	24.2096	24.9043	24.7594	24.6153	1.65188e+07	1.56537e+07	1.732e+07	1.64975e+07	0.0412429	1.93509e+07	1.71979e+07	2.05445e+07	1.90311e+07	0.0727658	1.97481e+07	1.90976e+07	1.94805e+07	1.94421e+07	0.0137305	2.78885e+07	3.51022e+07	3.12269e+07	3.14059e+07	0.0938575	2.42862e+07	3.03205e+07	3.06511e+07	2.84193e+07	0.102946	2.61406e+07	2.51264e+07	2.59702e+07	2.57457e+07	0.0172225
Q7L576	CYFIP1	Cytoplasmic FMR1-interacting protein 1	9	9	0.0878919	0.00461858		23.178	23.2185	23.1719	23.2679	23.2821	23.2821	9.0875e+06	9.87203e+06	9.51445e+06	9.49132e+06	0.0337888	9.12763e+06	9.58539e+06	1.0562e+07	9.75835e+06	0.061304	9.98515e+06	9.13455e+06	9.23609e+06	9.45193e+06	0.0401309	9.19273e+06	9.86471e+06	1.1213e+07	1.00902e+07	0.0832538	9.17017e+06	1.15088e+07	9.83931e+06	1.01728e+07	0.0966744	1.05024e+07	1.00668e+07	1.0009e+07	1.01928e+07	0.0216083
P23743	DGKA	Diacylglycerol kinase alpha	3	3	0.74468	0.00470763	+	20.7715	20.417	20.7471	21.5165	21.3376	21.3156	1.38579e+06	1.9716e+06	2.01091e+06	1.78943e+06	0.159755	1.46218e+06	1.36619e+06	1.37948e+06	1.40262e+06	0.0302767	1.95361e+06	1.65647e+06	1.6711e+06	1.7604e+06	0.0776857	2.73788e+06	2.97957e+06	3.27711e+06	2.99819e+06	0.0735555	2.96779e+06	2.72554e+06	2.244e+06	2.64578e+06	0.113699	2.74427e+06	2.95871e+06	2.1215e+06	2.60816e+06	0.136143
Q05193	DNM1	Dynamin-1	13	11	0.749017	0.00475701	+	23.8288	24.239	24.1946	24.8811	24.8044	24.824	1.34981e+07	1.58764e+07	1.54454e+07	1.494e+07	0.0692547	2.13436e+07	1.92741e+07	1.89251e+07	1.98476e+07	0.0537801	2.03665e+07	1.87564e+07	1.8544e+07	1.92223e+07	0.0423296	3.01801e+07	3.16621e+07	3.09674e+07	3.09365e+07	0.0195708	2.90057e+07	2.79462e+07	3.0916e+07	2.92893e+07	0.041956	2.92613e+07	2.96965e+07	3.01842e+07	2.9714e+07	0.0126861
Q9BQE3	TUBA1C	Tubulin alpha-1C chain	39	3	-0.629848	0.0048356	+	26.8949	26.6405	26.7135	26.1877	25.9567	26.215	1.23133e+08	1.24884e+08	1.26338e+08	1.24785e+08	0.0105008	9.91806e+07	1.08034e+08	1.06637e+08	1.04617e+08	0.0371465	1.08991e+08	1.0472e+08	1.16429e+08	1.10047e+08	0.0439642	8.15611e+07	7.44666e+07	7.32724e+07	7.64334e+07	0.0478649	6.76235e+07	6.54662e+07	6.22834e+07	6.51244e+07	0.0336808	7.48712e+07	7.69837e+07	8.18284e+07	7.78944e+07	0.0373888
P62906	RPL10A	60S ribosomal protein L10a	9	9	-0.323697	0.00484469		27.5688	27.389	27.4598	27.1059	27.1539	27.1866	2.08904e+08	1.98769e+08	1.89588e+08	1.99087e+08	0.0396252	1.76794e+08	1.77227e+08	1.73237e+08	1.75753e+08	0.0101705	1.94035e+08	1.74093e+08	1.85645e+08	1.84591e+08	0.0442895	1.50488e+08	1.36941e+08	1.45886e+08	1.44438e+08	0.0389421	1.62218e+08	1.38779e+08	1.46997e+08	1.49331e+08	0.0650272	1.59152e+08	1.50826e+08	1.48284e+08	1.52754e+08	0.0303858
P63151	PPP2R2A	Serine/threonine-protein phosphatase 2A 55 kDa regulatory subunit B alpha isoform	2	2	-0.597163	0.0048717	+	20.4471	20.3818	20.1769	19.8298	19.6058	19.7788	1.67113e+06	1.35565e+06	1.26183e+06	1.42954e+06	0.122468	1.3454e+06	1.40627e+06	1.34706e+06	1.36624e+06	0.020724	1.31661e+06	1.00433e+06	1.23526e+06	1.1854e+06	0.111585	1.03749e+06	1.13446e+06	623697	931883	0.237676	668950	878903	845723	797859	0.1155	908691	1.00102e+06	788837	899517	0.0965713
P40121	CAPG	Macrophage-capping protein	9	9	1.05433	0.00491974	+	26.8623	26.7771	26.3273	27.7389	27.8445	27.5463	1.2187e+08	1.22193e+08	1.22402e+08	1.22155e+08	0.00179026	1.16784e+08	1.11208e+08	1.17283e+08	1.15092e+08	0.0239269	8.50351e+07	8.33691e+07	8.4253e+07	8.42191e+07	0.00808063	2.18623e+08	2.15465e+08	2.37146e+08	2.23745e+08	0.0427408	2.33388e+08	2.35507e+08	2.55382e+08	2.41426e+08	0.0410319	1.84961e+08	2.02046e+08	2.01083e+08	1.9603e+08	0.039977
O95302	FKBP9	Peptidyl-prolyl cis-trans isomerase FKBP9	21	20	-0.938513	0.00502647	+	28.8166	28.7142	28.3034	27.6133	27.7928	27.6125	4.55616e+08	4.69531e+08	4.93224e+08	4.7279e+08	0.0328372	4.44848e+08	4.27616e+08	4.48735e+08	4.40399e+08	0.020839	3.11092e+08	3.408e+08	3.41864e+08	3.31252e+08	0.0430553	1.85668e+08	2.12948e+08	2.17363e+08	2.05326e+08	0.0682679	2.13744e+08	2.43759e+08	2.40079e+08	2.32527e+08	0.0574833	1.97636e+08	1.98226e+08	2.19762e+08	2.05208e+08	0.0501638
P62910	RPL32	60S ribosomal protein L32	7	7	-0.284991	0.00503117		26.4001	26.3348	26.2349	26.0723	26.0185	26.024	8.97522e+07	8.9392e+07	8.65279e+07	8.85573e+07	0.0162892	8.53867e+07	8.63064e+07	8.22235e+07	8.46389e+07	0.0206609	7.8689e+07	8.00149e+07	7.82171e+07	7.89737e+07	0.00963679	7.52436e+07	7.01141e+07	6.63188e+07	7.05588e+07	0.05183	7.40755e+07	6.81344e+07	6.17126e+07	6.79741e+07	0.0742695	6.57258e+07	7.03387e+07	6.86418e+07	6.82354e+07	0.0279179
P16035	TIMP2	Metalloproteinase inhibitor 2	7	7	0.42238	0.00520585	+	23.7492	23.632	23.6865	24.1642	24.1946	23.976	1.4621e+07	1.39706e+07	1.36722e+07	1.40879e+07	0.0281175	1.30647e+07	1.27529e+07	1.30582e+07	1.29586e+07	0.0112264	1.25502e+07	1.31156e+07	1.47281e+07	1.34646e+07	0.0685295	1.8807e+07	1.90658e+07	1.84589e+07	1.87772e+07	0.0132416	1.84841e+07	1.92631e+07	1.97316e+07	1.91596e+07	0.0268533	1.58785e+07	1.68011e+07	1.68831e+07	1.65209e+07	0.0275693
P52630	STAT2	Signal transducer and activator of transcription 2	2	2	-0.905046	0.00526296	+	20.8055	20.7543	20.6748	20.0724	19.5344	19.9126	2.23095e+06	1.69146e+06	1.5754e+06	1.83261e+06	0.15586	1.93575e+06	1.58227e+06	1.7881e+06	1.76871e+06	0.0819549	1.84665e+06	1.72727e+06	1.44787e+06	1.67393e+06	0.0998328	1.15985e+06	1.09343e+06	1.05443e+06	1.10257e+06	0.0394706	649094	759329	869597	759340	0.11855	955924	1.0053e+06	999539	986921	0.0223365
Q96EY7	PTCD3	Pentatricopeptide repeat domain-containing protein 3, mitochondrial	3	3	1.00625	0.00540685	+	22.8595	22.8651	23.0625	24.2243	23.9495	23.632	7.72217e+06	6.93579e+06	8.17204e+06	7.61e+06	0.0671344	8.07661e+06	7.41484e+06	7.42373e+06	7.63839e+06	0.0405695	8.10781e+06	9.4738e+06	8.70186e+06	8.76115e+06	0.0638314	1.72436e+07	2.32554e+07	1.82158e+07	1.95716e+07	0.134628	1.35905e+07	1.85168e+07	1.66326e+07	1.62466e+07	0.124924	1.37983e+07	1.20463e+07	1.33044e+07	1.30497e+07	0.0565239
Q9BZV1	UBXN6	UBX domain-containing protein 6	4	4	-0.543304	0.00546566	+	23.4141	23.419	23.1576	22.7953	22.868	22.6975	1.09171e+07	1.10715e+07	1.1545e+07	1.11779e+07	0.0238993	1.15755e+07	1.14209e+07	1.06509e+07	1.12158e+07	0.0360556	9.49256e+06	1.01441e+07	8.43312e+06	9.35658e+06	0.0753563	6.36003e+06	7.76129e+06	7.71627e+06	7.2792e+06	0.0893245	7.57486e+06	7.20522e+06	8.18487e+06	7.65498e+06	0.0527674	7.29953e+06	6.66324e+06	6.44268e+06	6.80182e+06	0.0534079
Q8IVF2	AHNAK2	Protein AHNAK2	104	98	1.62603	0.00550732	+	27.6798	26.8504	27.3066	29.2216	28.8858	28.6075	2.18413e+08	2.12953e+08	2.14471e+08	2.15279e+08	0.0106876	1.17414e+08	1.21965e+08	1.24384e+08	1.21254e+08	0.0238277	1.60287e+08	1.67244e+08	1.69312e+08	1.65614e+08	0.0233096	6.14039e+08	6.30403e+08	6.33448e+08	6.25963e+08	0.0136157	4.93486e+08	4.9635e+08	4.98801e+08	4.96212e+08	0.00437729	3.94531e+08	4.13648e+08	4.18706e+08	4.08962e+08	0.0254569
Q9HBR0	SLC38A10	Putative sodium-coupled neutral amino acid transporter 10	2	2	-0.589174	0.00558389	+	21.3429	21.072	21.3379	20.7334	20.5395	20.7124	2.40048e+06	3.10828e+06	2.47048e+06	2.65974e+06	0.119728	2.85611e+06	1.69368e+06	2.06373e+06	2.20451e+06	0.219953	2.69867e+06	2.50021e+06	2.75313e+06	2.65067e+06	0.0410055	1.97005e+06	1.41342e+06	1.84649e+06	1.74332e+06	0.136904	1.61344e+06	1.6901e+06	1.2687e+06	1.52408e+06	0.120254	1.60718e+06	2.09391e+06	1.45318e+06	1.71809e+06	0.158944
P05023	ATP1A1	Sodium/potassium-transporting ATPase subunit alpha-1	24	23	0.385616	0.00566439	+	27.8445	27.9031	27.7581	28.2445	28.3066	28.1115	2.42909e+08	2.42266e+08	2.37026e+08	2.40734e+08	0.0109451	2.45599e+08	2.51419e+08	2.55632e+08	2.50883e+08	0.0163961	2.21127e+08	2.24124e+08	2.37112e+08	2.27454e+08	0.0305018	3.14829e+08	3.17032e+08	3.22506e+08	3.18122e+08	0.0101468	3.19424e+08	3.42362e+08	3.35253e+08	3.32346e+08	0.0288471	2.86281e+08	2.92264e+08	2.91081e+08	2.89875e+08	0.00892514
Q07065	CKAP4	Cytoskeleton-associated protein 4	22	20	-0.371871	0.00567117	+	29.3213	29.2472	29.112	28.9104	28.8021	28.8522	6.61933e+08	6.83235e+08	6.67163e+08	6.70777e+08	0.0135132	6.31137e+08	6.55925e+08	6.24513e+08	6.37191e+08	0.0212175	5.68053e+08	5.8828e+08	5.84276e+08	5.80203e+08	0.0150728	5.37583e+08	4.90194e+08	4.85891e+08	5.04556e+08	0.046416	4.84315e+08	4.68732e+08	4.5115e+08	4.68065e+08	0.0289439	4.81993e+08	4.97733e+08	4.74059e+08	4.84595e+08	0.0203026
Q02543	RPL18A	60S ribosomal protein L18a	9	9	-0.548662	0.00570989	+	25.8549	25.6196	25.8824	25.2533	25.129	25.3286	6.33333e+07	6.31879e+07	5.55411e+07	6.06874e+07	0.0599716	5.26317e+07	5.47472e+07	4.72879e+07	5.15556e+07	0.0608831	6.58164e+07	5.93073e+07	6.04444e+07	6.1856e+07	0.0458906	4.40945e+07	3.94754e+07	3.64126e+07	3.99942e+07	0.0789482	4.24184e+07	3.58348e+07	3.18267e+07	3.66933e+07	0.118998	4.23226e+07	4.3648e+07	4.04457e+07	4.21388e+07	0.0311775
O60504	SORBS3	Vinexin	2	2	0.228708	0.00586299		22.8839	22.8423	22.928	23.155	23.0443	23.141	8.05697e+06	7.1204e+06	8.0548e+06	7.74406e+06	0.056946	6.80296e+06	7.98573e+06	7.75821e+06	7.51564e+06	0.068181	8.05021e+06	7.76294e+06	8.13833e+06	7.98382e+06	0.0200758	1.05256e+07	8.65435e+06	8.84114e+06	9.34035e+06	0.0900966	7.68464e+06	9.31422e+06	8.95832e+06	8.6524e+06	0.0808516	8.13535e+06	9.22279e+06	1.0395e+07	9.25104e+06	0.0997408
Q01813	PFKP	ATP-dependent 6-phosphofructokinase, platelet type	13	11	0.602196	0.00589888	+	24.0526	23.8764	23.867	24.3511	24.6703	24.5812	1.73402e+07	1.70122e+07	1.77237e+07	1.73587e+07	0.016749	1.58302e+07	1.47502e+07	1.57462e+07	1.54422e+07	0.0317652	1.53567e+07	1.52621e+07	1.52864e+07	1.53018e+07	0.00262106	2.20353e+07	2.08677e+07	2.13983e+07	2.14338e+07	0.0222699	2.54225e+07	2.65408e+07	2.79922e+07	2.66518e+07	0.0394731	2.32843e+07	2.51251e+07	2.67936e+07	2.50677e+07	0.0571738
P26373	RPL13	60S ribosomal protein L13	7	7	-0.36017	0.00597675	+	26.7012	26.5585	26.5963	26.2978	26.1546	26.323	1.1349e+08	1.07617e+08	1.06211e+08	1.09106e+08	0.028892	9.77189e+07	1.06375e+08	9.24024e+07	9.88322e+07	0.0582659	1.06927e+08	9.46462e+07	1.02795e+08	1.01456e+08	0.0502898	8.77915e+07	8.10833e+07	7.86034e+07	8.24927e+07	0.0470482	8.2163e+07	7.23996e+07	6.95384e+07	7.47003e+07	0.0723511	8.45672e+07	8.68837e+07	8.03997e+07	8.39502e+07	0.031957
P62280	RPS11	40S ribosomal protein S11	8	8	-0.332964	0.0060537		26.9405	26.7687	26.7666	26.4702	26.4651	26.5417	1.24247e+08	1.27121e+08	1.35029e+08	1.28799e+08	0.0353946	1.10464e+08	1.13779e+08	1.18761e+08	1.14335e+08	0.0298249	1.05772e+08	1.16708e+08	1.2002e+08	1.14167e+08	0.0533256	1.0048e+08	8.63777e+07	9.20314e+07	9.29629e+07	0.0623322	9.7557e+07	9.29782e+07	8.73704e+07	9.26352e+07	0.0449689	9.73757e+07	1.0154e+08	9.41531e+07	9.76894e+07	0.0309517
Q9H6B4	CLMP	CXADR-like membrane protein	2	2	0.79438	0.00608185	+	19.9024	19.8891	19.7123	20.9024	20.4874	20.4972	890669	1.15422e+06	894986	979958	0.125753	1.41642e+06	813752	682162	970778	0.329285	1.03424e+06	848021	694264	858842	0.161852	1.68423e+06	2.15021e+06	2.03567e+06	1.9567e+06	0.101325	1.67406e+06	1.81236e+06	936767	1.47439e+06	0.26067	1.41148e+06	1.413e+06	1.60593e+06	1.4768e+06	0.0618268
Q99757	TXN2	Thioredoxin, mitochondrial	4	4	0.425965	0.00612236	+	25.1871	25.2353	25.1908	25.5696	25.7871	25.5345	3.91747e+07	3.60081e+07	3.939e+07	3.8191e+07	0.0404807	3.91668e+07	4.13184e+07	3.80369e+07	3.95074e+07	0.0344521	3.64621e+07	3.54676e+07	4.29697e+07	3.82998e+07	0.0868667	4.94695e+07	5.03126e+07	4.95958e+07	4.97926e+07	0.00745652	5.72822e+07	5.72313e+07	5.93058e+07	5.79398e+07	0.0166749	4.69206e+07	4.9263e+07	4.94917e+07	4.85584e+07	0.0239278
Q05519	SRSF11	Serine/arginine-rich splicing factor 11	2	2	0.279451	0.00613638		21.7995	21.9637	21.9024	22.1612	22.2096	22.1332	3.43427e+06	4.19415e+06	3.32893e+06	3.65245e+06	0.105531	4.56732e+06	4.30174e+06	3.40161e+06	4.09022e+06	0.121961	4.00258e+06	3.88131e+06	3.88506e+06	3.92298e+06	0.0143523	4.66482e+06	4.56512e+06	4.85352e+06	4.69449e+06	0.0254754	4.45018e+06	5.07174e+06	5.03066e+06	4.85086e+06	0.0585091	4.30165e+06	4.57188e+06	4.92023e+06	4.59792e+06	0.0550691
P62701	RPS4X	40S ribosomal protein S4, X isoform	15	15	-0.354214	0.00620332	+	28.2011	28.2105	28.3487	27.9756	27.9094	27.8126	3.0986e+08	3.07814e+08	3.08114e+08	3.08596e+08	0.00292274	3.24477e+08	3.00152e+08	3.07162e+08	3.10597e+08	0.0329148	3.43512e+08	3.32794e+08	3.49164e+08	3.41824e+08	0.0198604	2.54473e+08	2.67317e+08	2.69996e+08	2.63929e+08	0.0256693	2.53718e+08	2.51859e+08	2.50735e+08	2.52104e+08	0.00487878	2.35489e+08	2.35281e+08	2.36453e+08	2.35741e+08	0.00216575
P17096	HMGA1	High mobility group protein HMG-I/HMG-Y	2	2	0.576286	0.0062854	+	27.4629	27.3992	27.5609	28.0609	28.217	27.8741	1.83837e+08	1.79885e+08	1.90133e+08	1.84618e+08	0.0228576	1.79034e+08	1.65362e+08	1.85947e+08	1.76781e+08	0.0483836	1.93465e+08	2.12223e+08	1.883e+08	1.97996e+08	0.0519132	3.02781e+08	2.52279e+08	2.85223e+08	2.80094e+08	0.0747388	3.16513e+08	2.99563e+08	3.19749e+08	3.11942e+08	0.0283766	2.37714e+08	2.59353e+08	2.41274e+08	2.46114e+08	0.0384943
Q86U42	PABPN1	Polyadenylate-binding protein 2	3	3	0.186527	0.00640339		24.4488	24.5345	24.5045	24.632	24.7129	24.7024	2.44724e+07	2.27685e+07	2.14234e+07	2.28881e+07	0.05451	2.34958e+07	2.58671e+07	2.36147e+07	2.43259e+07	0.044845	2.41964e+07	2.26891e+07	2.46065e+07	2.38307e+07	0.0345932	2.90753e+07	2.42708e+07	2.46884e+07	2.60115e+07	0.083546	2.63595e+07	2.72784e+07	2.89134e+07	2.75171e+07	0.0383831	2.82324e+07	2.59178e+07	2.76886e+07	2.72796e+07	0.0362249
P30536	TSPO	Translocator protein	2	2	0.69917	0.00648503	+	26.558	26.5225	26.518	27.217	27.4707	27.0084	9.04624e+07	1.00115e+08	1.05821e+08	9.87995e+07	0.0641582	9.54449e+07	9.18076e+07	1.0204e+08	9.64307e+07	0.0439181	9.2495e+07	9.79802e+07	9.78881e+07	9.61211e+07	0.0266779	1.42115e+08	1.58916e+08	1.6798e+08	1.56337e+08	0.068543	1.57253e+08	2.1208e+08	1.8734e+08	1.85558e+08	0.120817	1.36665e+08	1.32125e+08	1.37342e+08	1.35377e+08	0.0171108
Q99584	S100A13	Protein S100-A13	3	3	-1.01953	0.00650405	+	23.6686	23.7465	23.8193	23.0434	22.3828	22.7496	1.26608e+07	1.29993e+07	1.4343e+07	1.33344e+07	0.0544823	1.31133e+07	1.55023e+07	1.36067e+07	1.40741e+07	0.0731667	1.43696e+07	1.43717e+07	1.56648e+07	1.4802e+07	0.0412144	9.13466e+06	7.77382e+06	9.02585e+06	8.64478e+06	0.0714258	5.38387e+06	4.94734e+06	6.07575e+06	5.46899e+06	0.0849498	6.64294e+06	7.33359e+06	7.17997e+06	7.05217e+06	0.0419851
P30626	SRI	Sorcin	7	7	0.857876	0.00654374	+	25.2961	25.4831	25.4645	26.0317	26.5595	26.2262	4.27351e+07	3.99966e+07	4.0908e+07	4.12132e+07	0.0276278	4.66889e+07	4.77785e+07	4.63293e+07	4.69322e+07	0.0131282	4.56979e+07	4.64251e+07	4.67127e+07	4.62786e+07	0.00922749	6.85185e+07	6.91707e+07	6.81949e+07	6.8628e+07	0.00591351	9.48051e+07	1.00599e+08	1.01262e+08	9.88887e+07	0.0293273	7.7672e+07	8.06704e+07	7.72219e+07	7.85214e+07	0.0194926
Q15293	RCN1	Reticulocalbin-1	15	15	-0.495044	0.00666653	+	28.2379	28.4996	28.3098	27.9092	27.91	27.7429	3.21486e+08	3.18775e+08	3.09443e+08	3.16568e+08	0.0162942	3.77901e+08	3.7079e+08	3.89864e+08	3.79518e+08	0.0207379	3.32189e+08	3.33432e+08	3.32556e+08	3.32726e+08	0.00156674	2.56306e+08	2.47398e+08	2.52489e+08	2.52064e+08	0.0144777	2.61206e+08	2.48823e+08	2.46587e+08	2.52206e+08	0.0254933	2.18557e+08	2.3491e+08	2.20397e+08	2.24621e+08	0.0325604
Q13813	SPTAN1	Spectrin alpha chain, non-erythrocytic 1	76	70	0.861431	0.00680824	+	28.6216	28.1937	28.3109	29.4532	29.109	29.1483	4.09163e+08	4.11466e+08	4.19806e+08	4.13478e+08	0.0110568	3.00944e+08	3.1311e+08	3.06526e+08	3.0686e+08	0.0162045	3.29918e+08	3.32708e+08	3.36028e+08	3.32885e+08	0.0075026	7.10434e+08	7.42925e+08	7.51009e+08	7.34789e+08	0.0238638	5.60896e+08	5.72068e+08	6.0422e+08	5.79061e+08	0.0317154	5.80275e+08	5.97204e+08	6.07232e+08	5.94904e+08	0.0186994
P07339	CTSD	Cathepsin D	16	15	-0.9883	0.00683661	+	28.6593	29.0388	29.0688	28.0188	27.6596	28.1235	4.2259e+08	4.20097e+08	4.29108e+08	4.23932e+08	0.00896067	5.56855e+08	5.36065e+08	5.61547e+08	5.51489e+08	0.0200785	5.59737e+08	5.57145e+08	5.72452e+08	5.63111e+08	0.0118785	2.6964e+08	2.68334e+08	2.77908e+08	2.7196e+08	0.0155876	2.09535e+08	2.08911e+08	2.17599e+08	2.12015e+08	0.0186625	2.77303e+08	2.96497e+08	3.03507e+08	2.92436e+08	0.037877
P50479	PDLIM4	PDZ and LIM domain protein 4	3	3	-1.24582	0.00684543	+	21.2708	21.4925	20.7412	19.9913	19.7314	20.0443	2.56447e+06	2.57116e+06	2.4549e+06	2.53018e+06	0.0210644	3.00781e+06	2.9639e+06	2.8795e+06	2.9504e+06	0.0180457	1.92512e+06	1.28411e+06	2.04923e+06	1.75282e+06	0.191281	1.1422e+06	1.20862e+06	775987	1.04227e+06	0.182518	916520	704450	990434	870468	0.139245	1.28924e+06	1.02958e+06	925080	1.0813e+06	0.141591
P15529	CD46	Membrane cofactor protein	3	2	0.74184	0.0069209	+	21.953	21.5498	21.5404	22.3936	22.5213	22.3538	4.34553e+06	4.60579e+06	3.21751e+06	4.05628e+06	0.148546	2.28675e+06	3.37961e+06	3.53098e+06	3.06578e+06	0.180807	3.77213e+06	2.94159e+06	2.44083e+06	3.05152e+06	0.17992	5.38472e+06	4.94687e+06	6.19948e+06	5.51036e+06	0.0941931	5.63381e+06	6.20954e+06	6.21758e+06	6.02031e+06	0.0453995	5.08337e+06	6.02844e+06	4.95332e+06	5.35504e+06	0.0894701
Q9UKX7	NUP50	Nuclear pore complex protein Nup50	2	2	0.981011	0.00692149	+	20.3101	19.8667	20.4375	21.1332	21.0756	21.3484	1.32431e+06	1.28113e+06	1.30242e+06	1.30262e+06	0.0135314	850266	977316	1.04115e+06	956245	0.0829711	1.13904e+06	1.77051e+06	1.34182e+06	1.41712e+06	0.185758	2.06193e+06	2.565e+06	2.27408e+06	2.30034e+06	0.0896457	2.26732e+06	2.10138e+06	2.26034e+06	2.20968e+06	0.0346818	2.68371e+06	3.13169e+06	2.19362e+06	2.66967e+06	0.143499
Q9BQS8	FYCO1	FYVE and coiled-coil domain-containing protein 1	5	5	1.38249	0.00694143	+	20.8191	21.3645	21.4923	22.85	22.7056	22.2679	1.87786e+06	1.71948e+06	1.96266e+06	1.85333e+06	0.0543787	2.63468e+06	3.10763e+06	2.37223e+06	2.70484e+06	0.1125	3.0754e+06	2.85702e+06	2.90949e+06	2.9473e+06	0.0315803	7.17501e+06	8.01128e+06	7.48219e+06	7.55616e+06	0.0457096	6.47001e+06	7.38316e+06	6.66378e+06	6.83899e+06	0.057441	4.9347e+06	5.13086e+06	5.09923e+06	5.05493e+06	0.0170107
Q9UQ80	PA2G4	Proliferation-associated protein 2G4	10	9	-0.303854	0.00695504		26.3415	26.2998	26.1473	25.9617	25.9706	25.9448	8.63664e+07	8.39239e+07	8.48103e+07	8.50335e+07	0.0118726	7.81689e+07	8.65409e+07	8.31115e+07	8.26071e+07	0.0415998	7.38825e+07	7.3187e+07	7.58963e+07	7.43219e+07	0.0154578	7.05379e+07	6.22756e+07	6.32365e+07	6.535e+07	0.0564548	6.84934e+07	6.61846e+07	6.25806e+07	6.57529e+07	0.0370035	6.52805e+07	6.38461e+07	6.46397e+07	6.45888e+07	0.00908339
P08582	MELTF	Melanotransferrin	3	3	2.31092	0.00695684	+	18.8876	19.4067	20.2989	22.0292	22.0292	21.4676	410540	800751	243313	484868	0.481705	920530	545247	619096	694958	0.23358	1.6214e+06	1.1854e+06	1.06399e+06	1.29026e+06	0.185494	3.91256e+06	4.35087e+06	4.57072e+06	4.27805e+06	0.0639502	4.57054e+06	4.43999e+06	3.8241e+06	4.27821e+06	0.076082	3.23033e+06	2.74115e+06	2.71607e+06	2.89585e+06	0.0817502
Q15436	SEC23A	Protein transport protein Sec23A	22	20	-0.358473	0.0069595	+	26.9479	27.1426	27.0624	26.7692	26.6258	26.6825	1.22685e+08	1.34315e+08	1.31377e+08	1.29459e+08	0.0381416	1.53773e+08	1.47289e+08	1.43432e+08	1.48165e+08	0.0287974	1.35275e+08	1.44423e+08	1.40766e+08	1.40155e+08	0.026826	1.072e+08	1.1585e+08	1.20084e+08	1.14378e+08	0.046879	9.91111e+07	1.03375e+08	1.08173e+08	1.03553e+08	0.035748	1.06759e+08	1.0808e+08	1.08285e+08	1.07708e+08	0.00627761
Q96CC6	RHBDF1	Inactive rhomboid protein 1	4	4	0.674447	0.00715474	+	21.4067	21.2989	21.4825	22.3129	21.9243	21.9742	2.83374e+06	2.87246e+06	2.62835e+06	2.77818e+06	0.0385575	2.56593e+06	2.36556e+06	2.79907e+06	2.57685e+06	0.0687461	2.89203e+06	3.00512e+06	2.90028e+06	2.93248e+06	0.0175538	5.12137e+06	5.18952e+06	5.33284e+06	5.21458e+06	0.0169011	4.02074e+06	4.13978e+06	3.78549e+06	3.982e+06	0.0369691	4.75853e+06	3.6269e+06	3.96584e+06	4.11709e+06	0.11518
Q9Y4D7	PLXND1	Plexin-D1	2	2	-0.5106	0.00718989	+	23.3854	23.0636	23.2736	22.6698	22.727	22.794	1.113e+07	1.0888e+07	1.08551e+07	1.09577e+07	0.0111853	8.44579e+06	8.28266e+06	9.57114e+06	8.76653e+06	0.0653426	9.7904e+06	1.02495e+07	1.03812e+07	1.01404e+07	0.0249736	6.14194e+06	6.70731e+06	7.1679e+06	6.67238e+06	0.0628822	5.91832e+06	8.00751e+06	6.90165e+06	6.94249e+06	0.122924	8.0584e+06	6.8653e+06	6.8939e+06	7.27253e+06	0.0764269
O75781	PALM	Paralemmin-1	2	2	1.90128	0.00729049	+	20.8876	20.265	20.3321	22.8132	22.6119	21.7634	2.17285e+06	1.9437e+06	1.6906e+06	1.93572e+06	0.101751	1.51253e+06	1.16127e+06	1.12083e+06	1.26487e+06	0.139061	1.49334e+06	1.17943e+06	1.28934e+06	1.3207e+06	0.0984765	7.13209e+06	7.58697e+06	7.37874e+06	7.36594e+06	0.0252415	6.55303e+06	5.89723e+06	6.77535e+06	6.40854e+06	0.0581673	3.68099e+06	3.66904e+06	3.32739e+06	3.55914e+06	0.0460627
Q8TEQ0	SNX29	Sorting nexin-29	2	2	1.4546	0.0073247	+	19.4952	19.0612	18.8361	20.3101	21.0088	20.4375	790924	638087	786865	738625	0.0962745	428319	475367	736009	546565	0.247596	516132	415798	472744	468225	0.0877475	1.15577e+06	1.50598e+06	1.25107e+06	1.30427e+06	0.11335	2.42662e+06	2.00998e+06	1.89873e+06	2.11178e+06	0.107593	1.46529e+06	1.20648e+06	1.5753e+06	1.41569e+06	0.109206
Q13011	ECH1	Delta(3,5)-Delta(2,4)-dienoyl-CoA isomerase, mitochondrial	9	9	0.673665	0.00736214	+	25.6568	25.604	25.6348	26.1908	26.5711	26.1546	5.2435e+07	5.16805e+07	5.46724e+07	5.29293e+07	0.0240031	5.08806e+07	5.32631e+07	4.89913e+07	5.1045e+07	0.0342409	5.22816e+07	5.1187e+07	5.28515e+07	5.21067e+07	0.0132557	7.44389e+07	7.85155e+07	7.68396e+07	7.6598e+07	0.0218415	9.57048e+07	1.04262e+08	9.90169e+07	9.96614e+07	0.0353518	7.58001e+07	7.42563e+07	7.39122e+07	7.46562e+07	0.0109972
P25786	PSMA1	Proteasome subunit alpha type-1	8	8	-0.3581	0.00739004	+	25.8474	25.7084	25.6274	25.3146	25.372	25.4221	5.98521e+07	5.90013e+07	6.22604e+07	6.03713e+07	0.0228623	5.54117e+07	5.35514e+07	5.55176e+07	5.48269e+07	0.0164689	5.05007e+07	5.33356e+07	5.16638e+07	5.18334e+07	0.0224472	4.27585e+07	4.06297e+07	4.18067e+07	4.17317e+07	0.0208641	4.27308e+07	4.3537e+07	4.40094e+07	4.34257e+07	0.0121561	4.39101e+07	4.61112e+07	4.48585e+07	4.49599e+07	0.0200499
Q9BVK6	TMED9	Transmembrane emp24 domain-containing protein 9	13	6	-0.382963	0.00740165	+	24.8584	24.9544	24.7024	24.471	24.4812	24.4141	2.91166e+07	3.15002e+07	3.06334e+07	3.04167e+07	0.0323862	3.00356e+07	3.37613e+07	3.37347e+07	3.25105e+07	0.0538305	2.75779e+07	2.8125e+07	2.61983e+07	2.73004e+07	0.029694	2.35474e+07	2.31383e+07	2.30764e+07	2.32541e+07	0.00898673	2.52336e+07	2.24393e+07	2.25864e+07	2.34198e+07	0.0548245	2.13188e+07	2.10523e+07	2.46939e+07	2.2355e+07	0.0741412
Q02252	ALDH6A1	Methylmalonate-semialdehyde dehydrogenase [acylating], mitochondrial	9	8	0.471483	0.00742483	+	23.632	23.8191	23.654	24.0772	24.317	24.1253	1.32162e+07	1.18821e+07	1.39348e+07	1.3011e+07	0.0653663	1.50602e+07	1.56367e+07	1.38243e+07	1.48404e+07	0.0509458	1.22605e+07	1.29707e+07	1.42561e+07	1.31624e+07	0.0627458	1.79948e+07	1.83202e+07	1.67315e+07	1.76822e+07	0.0387521	2.29396e+07	2.06161e+07	1.92888e+07	2.09482e+07	0.0720268	1.86729e+07	1.78251e+07	1.83688e+07	1.82889e+07	0.0191759
P08240	SRPRA	Signal recognition particle receptor subunit alpha	3	3	-0.583644	0.00743436	+	21.8917	21.6032	21.5857	21.2288	21.0264	21.0745	3.55863e+06	4.13407e+06	3.97987e+06	3.89086e+06	0.0625071	3.30573e+06	2.68524e+06	3.56632e+06	3.18577e+06	0.116005	2.66297e+06	3.04524e+06	3.73371e+06	3.14731e+06	0.140771	2.61824e+06	2.38113e+06	2.37324e+06	2.45754e+06	0.0462584	2.08243e+06	2.06605e+06	2.25907e+06	2.13585e+06	0.0409144	1.95012e+06	2.24611e+06	2.42847e+06	2.20823e+06	0.0892635
O75094	SLIT3	Slit homolog 3 protein	22	20	0.659962	0.00744574	+	24.7895	24.867	25.1604	25.4676	25.6348	25.6944	2.87068e+07	3.04062e+07	2.78498e+07	2.89876e+07	0.036648	3.00879e+07	3.05419e+07	3.11625e+07	3.05974e+07	0.0143942	3.57948e+07	3.78417e+07	3.89131e+07	3.75166e+07	0.0344815	4.77062e+07	4.38657e+07	4.77311e+07	4.64344e+07	0.0391165	5.41647e+07	5.06613e+07	5.14067e+07	5.20776e+07	0.0289354	5.18456e+07	5.64804e+07	5.47118e+07	5.43459e+07	0.0351404
Q15113	PCOLCE	Procollagen C-endopeptidase enhancer 1	7	6	-1.67856	0.00754543	+	24.9158	25.2232	24.3325	22.7957	23.1122	23.5279	3.18039e+07	3.31471e+07	3.00039e+07	3.16516e+07	0.0406848	3.79414e+07	3.98087e+07	3.97541e+07	3.9168e+07	0.0221526	2.24375e+07	2.07548e+07	2.01845e+07	2.11256e+07	0.045274	7.57143e+06	7.58055e+06	6.6914e+06	7.28113e+06	0.057274	9.74166e+06	8.64799e+06	8.81053e+06	9.06673e+06	0.0531438	1.14423e+07	1.14322e+07	1.341e+07	1.20948e+07	0.0768921
Q8ND94	LRRN4CL	LRRN4 C-terminal-like protein	5	5	0.586615	0.00780483	+	27.4551	27.1604	27.217	27.8741	27.9923	27.726	1.96019e+08	1.82999e+08	1.73138e+08	1.84052e+08	0.0509146	1.41747e+08	1.61162e+08	1.48123e+08	1.50344e+08	0.0537447	1.46074e+08	1.55308e+08	1.67152e+08	1.56178e+08	0.0552383	2.55166e+08	2.4006e+08	2.41748e+08	2.45658e+08	0.0275107	2.70312e+08	2.73419e+08	2.58186e+08	2.67306e+08	0.0245862	2.1164e+08	2.18744e+08	2.35657e+08	2.22014e+08	0.045373
O94905	ERLIN2	Erlin-2	7	6	-0.526307	0.00786271	+	24.3763	24.3816	24.2628	24.0098	23.7457	23.6863	2.263e+07	2.19569e+07	2.07435e+07	2.17768e+07	0.0358455	2.22147e+07	2.14088e+07	2.19486e+07	2.18574e+07	0.0153391	2.05737e+07	2.02644e+07	1.95518e+07	2.01299e+07	0.0212546	1.78411e+07	1.55443e+07	1.72908e+07	1.68921e+07	0.0579651	1.45714e+07	1.45048e+07	1.31213e+07	1.40658e+07	0.0475227	1.34372e+07	1.26618e+07	1.43965e+07	1.34985e+07	0.0525619
Q15029	EFTUD2	116 kDa U5 small nuclear ribonucleoprotein component	20	20	0.237459	0.00788836		24.7895	24.7995	24.848	25.0359	25.1332	24.9803	2.88568e+07	2.83647e+07	2.97258e+07	2.89824e+07	0.0194154	2.94925e+07	2.83829e+07	2.96327e+07	2.91693e+07	0.019166	3.02905e+07	3.01831e+07	3.01446e+07	3.02061e+07	0.00204448	3.5143e+07	3.24132e+07	3.57383e+07	3.44315e+07	0.0420449	3.81316e+07	3.60446e+07	3.62175e+07	3.67979e+07	0.0257001	3.34313e+07	3.22979e+07	3.36461e+07	3.31251e+07	0.0178551
Q9NVA2	SEPTIN11	Septin-11	12	8	-0.433489	0.00790299	+	26.2254	26.2563	26.1106	25.7522	25.6385	25.9012	7.8732e+07	8.11817e+07	7.54605e+07	7.84581e+07	0.0298718	7.97158e+07	8.28634e+07	7.78925e+07	8.01572e+07	0.025615	7.22735e+07	7.54064e+07	6.96928e+07	7.24576e+07	0.0322424	5.6488e+07	5.43607e+07	5.87096e+07	5.65194e+07	0.0314153	4.92985e+07	5.31405e+07	5.42646e+07	5.22345e+07	0.040705	5.67338e+07	6.84727e+07	6.279e+07	6.26655e+07	0.0764884
P06132	UROD	Uroporphyrinogen decarboxylase	3	3	0.538144	0.00792492	+	21.2933	21.002	21.1332	21.5498	21.7876	21.7056	2.1677e+06	2.44635e+06	3.10015e+06	2.5714e+06	0.151981	2.05126e+06	1.94427e+06	2.30883e+06	2.10145e+06	0.072808	2.41016e+06	2.16598e+06	2.3237e+06	2.29995e+06	0.0439533	3.05194e+06	2.76358e+06	3.39432e+06	3.06995e+06	0.08398	3.79076e+06	3.29824e+06	3.7638e+06	3.6176e+06	0.0624962	3.45579e+06	2.75649e+06	4.03283e+06	3.41504e+06	0.152812
O14818	PSMA7	Proteasome subunit alpha type-7	6	6	-0.331907	0.00801259		25.9179	25.8545	25.6974	25.4579	25.5051	25.511	6.26294e+07	6.281e+07	6.47467e+07	6.33954e+07	0.0151172	5.79195e+07	6.12837e+07	6.28124e+07	6.06719e+07	0.0336867	5.03328e+07	5.48701e+07	5.80283e+07	5.44104e+07	0.0580489	4.64524e+07	4.60534e+07	4.57619e+07	4.60892e+07	0.00614124	4.47569e+07	4.89201e+07	4.91901e+07	4.76224e+07	0.0426099	4.54729e+07	4.95216e+07	4.84538e+07	4.78161e+07	0.0358302
P27144	AK4	Adenylate kinase 4, mitochondrial	6	6	0.943848	0.0080127	+	22.0156	22.4701	22.6518	23.2535	23.3511	23.3645	4.59681e+06	4.2214e+06	3.9024e+06	4.2402e+06	0.0669323	6.48613e+06	5.59917e+06	5.35905e+06	5.81478e+06	0.0833611	7.57823e+06	5.90229e+06	6.29095e+06	6.59049e+06	0.108677	1.09356e+07	9.45192e+06	9.7534e+06	1.0047e+07	0.0637299	1.17827e+07	1.04478e+07	9.84378e+06	1.06914e+07	0.0757687	1.0675e+07	1.07235e+07	1.10951e+07	1.08312e+07	0.0173258
P23396	RPS3	40S ribosomal protein S3	15	15	-0.300921	0.00814045		28.1492	28.0503	27.986	27.7925	27.8074	27.6828	2.96427e+08	2.94289e+08	3.02343e+08	2.97686e+08	0.0114428	2.82666e+08	2.81239e+08	2.69967e+08	2.77958e+08	0.0204339	2.67324e+08	2.5515e+08	2.75033e+08	2.65836e+08	0.0307903	2.4799e+08	2.30271e+08	2.19153e+08	2.32471e+08	0.0510809	2.51079e+08	2.31336e+08	2.22253e+08	2.34889e+08	0.0512308	2.10307e+08	2.1747e+08	2.18592e+08	2.15456e+08	0.0170313
Q9H6S3	EPS8L2	Epidermal growth factor receptor kinase substrate 8-like protein 2	2	2	1.52779	0.00820958	+	18.3752	17.9488	17.4576	19.778	19.3709	19.2161	210192	278952	532039	340394	0.406558	447610	191453	121412	253492	0.55311	258442	126352	154459	179751	0.31607	988259	762935	944766	898653	0.108603	872071	466439	696831	678447	0.244836	551707	657521	618422	609217	0.0717083
Q15459	SF3A1	Splicing factor 3A subunit 1	8	8	0.343527	0.00829353		24.2021	24.2317	24.217	24.4298	24.6703	24.5812	1.83545e+07	2.09275e+07	1.86936e+07	1.93252e+07	0.0590632	1.79453e+07	2.10874e+07	1.9968e+07	1.96669e+07	0.0661157	1.92774e+07	2.01503e+07	1.91116e+07	1.95131e+07	0.0233492	2.32996e+07	2.18286e+07	2.27445e+07	2.26242e+07	0.0268075	2.46444e+07	2.80563e+07	2.75281e+07	2.6743e+07	0.0560692	2.51582e+07	2.41902e+07	2.60985e+07	2.51489e+07	0.0309781
Q9Y230	RUVBL2	RuvB-like 2	10	10	-0.123706	0.00832262		24.483	24.4949	24.5562	24.3644	24.3989	24.3997	2.6115e+07	2.18037e+07	2.24267e+07	2.34485e+07	0.0811386	2.62784e+07	2.35447e+07	2.1107e+07	2.36434e+07	0.0893429	2.42658e+07	2.11278e+07	2.86153e+07	2.46696e+07	0.124447	2.00414e+07	2.39026e+07	2.0852e+07	2.15986e+07	0.0769674	2.36415e+07	2.15806e+07	2.11385e+07	2.21202e+07	0.0493107	2.25743e+07	2.20972e+07	2.17296e+07	2.21337e+07	0.0156235
O75521	ECI2	Enoyl-CoA delta isomerase 2, mitochondrial	12	10	0.537882	0.0083551	+	24.989	24.7492	24.8385	25.2426	25.4073	25.5404	3.58362e+07	3.1916e+07	3.22062e+07	3.33195e+07	0.053529	2.73608e+07	2.65308e+07	3.08178e+07	2.82364e+07	0.065747	2.88614e+07	3.17457e+07	2.94711e+07	3.0026e+07	0.0413359	3.8299e+07	4.08509e+07	3.98804e+07	3.96768e+07	0.026507	4.28105e+07	4.48281e+07	4.57269e+07	4.44552e+07	0.0274317	4.53526e+07	5.10618e+07	5.00494e+07	4.88213e+07	0.0509468
Q9UL46	PSME2	Proteasome activator complex subunit 2	4	4	-0.340906	0.00846266		24.3503	24.3873	24.229	24.0067	23.8814	24.0558	1.90729e+07	2.19408e+07	2.31499e+07	2.13878e+07	0.079939	2.18556e+07	2.10096e+07	2.29663e+07	2.19438e+07	0.036514	1.97413e+07	1.78526e+07	2.13958e+07	1.96632e+07	0.0736176	1.49866e+07	1.75857e+07	1.7995e+07	1.68558e+07	0.0790361	1.1987e+07	1.71253e+07	1.72463e+07	1.54529e+07	0.158628	1.66974e+07	1.77054e+07	1.79125e+07	1.74384e+07	0.0304352
P06241	FYN	Tyrosine-protein kinase Fyn	4	2	1.48127	0.00868157	+	20.6886	19.7439	20.4476	21.9566	21.8269	21.5404	1.55118e+06	1.87581e+06	1.64371e+06	1.69023e+06	0.08079	895177	719205	1.02086e+06	878414	0.140844	1.17806e+06	1.79724e+06	1.31253e+06	1.42928e+06	0.18605	3.63652e+06	4.33624e+06	4.23459e+06	4.06912e+06	0.0758625	2.76214e+06	4.66415e+06	3.72043e+06	3.71557e+06	0.208985	2.96136e+06	3.13272e+06	3.04918e+06	3.04776e+06	0.0229562
O60488	ACSL4	Long-chain-fatty-acid--CoA ligase 4	6	5	0.750696	0.0086879	+	22.3805	22.1976	22.6431	23.3239	23.0224	23.1269	6.34094e+06	4.798e+06	5.22821e+06	5.45572e+06	0.119164	5.66897e+06	4.33364e+06	4.43036e+06	4.81099e+06	0.126371	6.23715e+06	6.77502e+06	6.63187e+06	6.54802e+06	0.0347357	1.01096e+07	1.02519e+07	1.11843e+07	1.05153e+07	0.0453264	8.89824e+06	7.96674e+06	8.69547e+06	8.52015e+06	0.0469454	8.81971e+06	9.23756e+06	9.43691e+06	9.16473e+06	0.0280617
Q12907	LMAN2	Vesicular integral-membrane protein VIP36	7	7	-0.412019	0.0087898	+	26.1483	25.9259	26.0245	25.7085	25.6413	25.5128	7.10698e+07	7.47313e+07	7.73192e+07	7.43734e+07	0.0344722	6.13847e+07	6.28851e+07	6.69823e+07	6.37507e+07	0.0371093	6.70899e+07	6.76061e+07	7.00765e+07	6.82575e+07	0.0190947	5.1831e+07	5.47204e+07	5.79485e+07	5.48333e+07	0.04557	5.14274e+07	5.31384e+07	5.24468e+07	5.23375e+07	0.0134283	4.58579e+07	4.70767e+07	5.06894e+07	4.78746e+07	0.0428528
P09038	FGF2	Fibroblast growth factor 2	4	4	-0.80379	0.00880503	+	22.2828	22.2818	21.8931	21.1344	21.4614	21.4506	5.17213e+06	5.16684e+06	4.96931e+06	5.10276e+06	0.0184975	5.20441e+06	5.16009e+06	4.93278e+06	5.09909e+06	0.0233345	3.84843e+06	3.98165e+06	3.85432e+06	3.8948e+06	0.0157804	2.35404e+06	2.29014e+06	2.26165e+06	2.30194e+06	0.0167811	3.05302e+06	2.82755e+06	2.78183e+06	2.88747e+06	0.0410547	2.81559e+06	2.95686e+06	2.82556e+06	2.866e+06	0.0224611
P69905	HBA1;	Hemoglobin subunit alpha	2	2	0.793916	0.00880832	+	24.6096	24.8288	24.3376	25.217	25.4394	25.5014	2.64419e+07	2.51624e+07	2.50584e+07	2.55542e+07	0.0246177	2.85712e+07	2.91133e+07	3.18244e+07	2.98363e+07	0.0476984	2.11478e+07	2.10986e+07	2.12598e+07	2.11687e+07	0.00318691	4.15157e+07	3.60171e+07	3.95873e+07	3.904e+07	0.0583482	4.81089e+07	4.53276e+07	4.29718e+07	4.54694e+07	0.0461757	4.52985e+07	4.71313e+07	5.0202e+07	4.75439e+07	0.0425497
O94855	SEC24D	Protein transport protein Sec24D	9	9	-0.68969	0.00880869	+	24.984	25.1551	25.0629	24.4936	24.1071	24.5322	3.26136e+07	3.25916e+07	3.43476e+07	3.31843e+07	0.0247897	3.86101e+07	3.72765e+07	3.62028e+07	3.73632e+07	0.0263543	3.45259e+07	3.46114e+07	3.60125e+07	3.50499e+07	0.0194441	2.52217e+07	2.34845e+07	2.21563e+07	2.36208e+07	0.0531369	1.74249e+07	1.92777e+07	1.75091e+07	1.80706e+07	0.0472752	2.37883e+07	2.50325e+07	2.3968e+07	2.42629e+07	0.0226302
O00429	DNM1L	Dynamin-1-like protein	12	12	0.344925	0.00884332		23.6431	23.4551	23.4923	23.8576	23.8093	23.9584	1.32042e+07	1.37377e+07	1.2421e+07	1.3121e+07	0.0412119	1.13703e+07	1.17935e+07	1.1416e+07	1.15266e+07	0.0164517	1.14734e+07	1.27834e+07	1.11965e+07	1.18178e+07	0.0585619	1.39446e+07	1.45885e+07	1.70813e+07	1.52048e+07	0.0889637	1.18127e+07	1.57748e+07	1.64475e+07	1.46783e+07	0.139311	1.60567e+07	1.61414e+07	1.65993e+07	1.62658e+07	0.014652
Q02878	RPL6	60S ribosomal protein L6	13	12	-0.201418	0.00885883		27.5443	27.5926	27.5113	27.401	27.3611	27.2818	1.93552e+08	1.99442e+08	1.94184e+08	1.95726e+08	0.0134886	2.00711e+08	1.99613e+08	2.06861e+08	2.02395e+08	0.0157589	1.85313e+08	1.93542e+08	1.95056e+08	1.91304e+08	0.0223782	1.71634e+08	1.83857e+08	1.76188e+08	1.77227e+08	0.0284594	1.61068e+08	1.75739e+08	1.80358e+08	1.72388e+08	0.0477067	1.60169e+08	1.65768e+08	1.6357e+08	1.63169e+08	0.0141158
P49915	GMPS	GMP synthase [glutamine-hydrolyzing]	7	7	0.285138	0.00900183		23.2006	23.1719	23.0821	23.5285	23.417	23.3645	9.86999e+06	9.65008e+06	9.40321e+06	9.64109e+06	0.0197764	9.86732e+06	9.23618e+06	9.25278e+06	9.45209e+06	0.031071	7.98212e+06	9.32779e+06	9.33963e+06	8.88318e+06	0.0717266	9.5218e+06	1.21371e+07	1.45407e+07	1.20665e+07	0.169854	9.70366e+06	1.12739e+07	1.25639e+07	1.11805e+07	0.104608	1.17065e+07	9.67735e+06	1.11511e+07	1.0845e+07	0.0789502
Q92504	SLC39A7	Zinc transporter SLC39A7	2	2	-0.534197	0.00902015	+	23.2636	23.5367	23.2406	22.9166	22.8141	22.7076	9.24656e+06	1.0746e+07	1.02177e+07	1.00701e+07	0.0616638	1.21062e+07	1.19081e+07	1.24937e+07	1.21693e+07	0.0199838	1.0057e+07	9.8361e+06	9.84055e+06	9.91122e+06	0.0104033	7.15939e+06	8.54962e+06	8.04381e+06	7.91761e+06	0.0725635	6.80544e+06	7.36007e+06	7.95782e+06	7.37444e+06	0.0638108	7.77428e+06	6.85973e+06	5.91524e+06	6.84975e+06	0.110805
Q6IBS0	TWF2	Twinfilin-2	8	8	0.187851	0.00905275		24.1565	24.2243	24.1015	24.317	24.3778	24.3511	1.9896e+07	1.84969e+07	1.77773e+07	1.87234e+07	0.0469819	1.86406e+07	2.02061e+07	1.98687e+07	1.95718e+07	0.03437	1.83301e+07	1.6755e+07	1.88488e+07	1.7978e+07	0.0495233	2.17597e+07	2.05805e+07	2.04639e+07	2.09347e+07	0.0279579	2.06235e+07	2.16442e+07	2.31452e+07	2.18043e+07	0.0474998	2.15156e+07	2.06631e+07	2.20099e+07	2.13962e+07	0.0259988
P62851	RPS25	40S ribosomal protein S25	3	3	-0.333536	0.00912447		25.3675	25.2674	25.1268	24.9003	24.9341	24.9266	4.73843e+07	4.25231e+07	3.99596e+07	4.3289e+07	0.0711298	3.7173e+07	4.2459e+07	4.15283e+07	4.03868e+07	0.0570489	3.57971e+07	3.59724e+07	3.8141e+07	3.66368e+07	0.0290972	3.44978e+07	2.94071e+07	3.00394e+07	3.13148e+07	0.0723461	3.53359e+07	3.03897e+07	3.04452e+07	3.20569e+07	0.0723305	3.16243e+07	3.09342e+07	3.31107e+07	3.18898e+07	0.0284776
Q04837	SSBP1	Single-stranded DNA-binding protein, mitochondrial	7	7	0.443882	0.00913266	+	25.6649	25.705	25.7871	26.1871	26.2996	26.002	5.07308e+07	5.34456e+07	5.54232e+07	5.31999e+07	0.0361563	5.43465e+07	5.53097e+07	5.44509e+07	5.47024e+07	0.00788923	5.55413e+07	5.85004e+07	5.96332e+07	5.78916e+07	0.0297987	6.84388e+07	7.91061e+07	8.17739e+07	7.64396e+07	0.075371	7.6093e+07	8.12503e+07	9.03408e+07	8.25614e+07	0.0713413	6.46197e+07	6.92534e+07	6.76432e+07	6.71721e+07	0.0285949
Q9HB71	CACYBP	Calcyclin-binding protein	4	4	0.350335	0.00919876		23.417	23.4425	23.417	23.8764	23.632	23.8191	1.08005e+07	1.05121e+07	1.23154e+07	1.12093e+07	0.0705608	9.65088e+06	1.34746e+07	1.11778e+07	1.14344e+07	0.137439	1.04865e+07	1.1557e+07	1.1473e+07	1.11722e+07	0.0435036	1.6101e+07	1.48467e+07	1.53863e+07	1.54446e+07	0.0332636	1.12195e+07	1.4178e+07	1.34825e+07	1.296e+07	0.0974566	1.50167e+07	1.48614e+07	1.45223e+07	1.48001e+07	0.0139474
P43155	CRAT	Carnitine O-acetyltransferase	4	4	0.611322	0.00920248	+	24.3031	24.2679	24.5225	24.8904	25.1795	24.8576	1.96988e+07	2.10301e+07	2.14887e+07	2.07392e+07	0.0366049	1.97451e+07	2.09368e+07	1.98469e+07	2.01763e+07	0.0267329	2.50404e+07	2.3451e+07	2.38153e+07	2.41022e+07	0.0282076	3.20446e+07	3.0465e+07	3.06845e+07	3.10647e+07	0.0224898	3.88403e+07	3.75503e+07	3.75428e+07	3.79778e+07	0.016059	3.0076e+07	3.09563e+07	3.00443e+07	3.03588e+07	0.013922
O95980	RECK	Reversion-inducing cysteine-rich protein with Kazal motifs	28	28	0.270835	0.00925808		27.341	27.5014	27.4154	27.6595	27.7581	27.6527	1.72459e+08	1.71209e+08	1.6717e+08	1.70279e+08	0.013255	1.86163e+08	1.99771e+08	1.84006e+08	1.8998e+08	0.036736	1.83719e+08	1.70972e+08	1.81547e+08	1.78746e+08	0.0311516	2.21529e+08	2.06042e+08	2.08774e+08	2.12115e+08	0.0318206	2.32765e+08	2.27459e+08	2.21861e+08	2.27362e+08	0.0195821	2.02407e+08	2.10492e+08	2.18918e+08	2.10606e+08	0.0320089
P18669	PGAM1	Phosphoglycerate mutase 1	14	14	-0.211575	0.00929474		28.9498	29.0558	29.0005	28.7304	28.7969	28.8441	5.27286e+08	5.0153e+08	5.26741e+08	5.18519e+08	0.0231718	5.37275e+08	5.5707e+08	5.79732e+08	5.58025e+08	0.0310846	5.22551e+08	5.22959e+08	5.6569e+08	5.37067e+08	0.0376864	4.42357e+08	4.4026e+08	4.53433e+08	4.4535e+08	0.0129768	4.51729e+08	4.67318e+08	4.80041e+08	4.66363e+08	0.0248261	4.62615e+08	4.95249e+08	4.87815e+08	4.81893e+08	0.0289807
P53004	BLVRA	Biliverdin reductase A	3	3	0.322252	0.00934213		22.2066	22.0886	22.2361	22.4451	22.6029	22.4501	4.05033e+06	5.27425e+06	5.18659e+06	4.83706e+06	0.115245	4.31976e+06	3.88913e+06	5.16606e+06	4.45832e+06	0.118975	4.91347e+06	5.21828e+06	4.68412e+06	4.93862e+06	0.044303	5.80143e+06	5.82384e+06	5.5078e+06	5.71103e+06	0.0252129	6.05486e+06	6.6669e+06	6.39447e+06	6.37208e+06	0.039291	5.66888e+06	5.72616e+06	5.79951e+06	5.73151e+06	0.00932798
P48960	ADGRE5	CD97 antigen	7	7	1.21378	0.00936949	+	23.8858	23.5638	23.1127	24.824	24.8997	24.48	1.43884e+07	1.45547e+07	1.74449e+07	1.54627e+07	0.090752	1.24611e+07	1.21612e+07	1.25334e+07	1.23852e+07	0.0130087	7.94706e+06	1.03731e+07	8.88721e+06	9.06914e+06	0.110128	2.83487e+07	3.00757e+07	3.07897e+07	2.9738e+07	0.034459	3.20411e+07	3.17264e+07	3.01651e+07	3.13109e+07	0.0261987	2.23104e+07	2.2652e+07	2.52417e+07	2.34014e+07	0.0559258
P62277	RPS13	40S ribosomal protein S13	10	10	-0.323126	0.0094234		26.6582	26.6958	26.5109	26.3501	26.3251	26.2204	1.0675e+08	1.02424e+08	1.08551e+08	1.05908e+08	0.0242803	1.0112e+08	1.12552e+08	1.12426e+08	1.08699e+08	0.0493049	9.55577e+07	9.69365e+07	9.43892e+07	9.56278e+07	0.0108873	8.68134e+07	8.62676e+07	8.3539e+07	8.554e+07	0.016745	8.41408e+07	8.21274e+07	8.59379e+07	8.40687e+07	0.0185143	7.29853e+07	7.98297e+07	8.17406e+07	7.81852e+07	0.0480746
O00299	CLIC1	Chloride intracellular channel protein 1	10	9	0.430158	0.00944467	+	27.3324	27.217	27.1795	27.6663	27.8142	27.5389	1.76355e+08	1.651e+08	1.66815e+08	1.69423e+08	0.0292244	1.64631e+08	1.48278e+08	1.55049e+08	1.55986e+08	0.0430097	1.52602e+08	1.47007e+08	1.57849e+08	1.52486e+08	0.0290305	1.99068e+08	2.16162e+08	2.23207e+08	2.12813e+08	0.0476258	2.37308e+08	2.25243e+08	2.4489e+08	2.35814e+08	0.0343084	1.91428e+08	2.01503e+08	1.92331e+08	1.95087e+08	0.0233296
Q06210	GFPT1	Glutamine--fructose-6-phosphate aminotransferase [isomerizing] 1	4	4	-1.674	0.00946485	+	23.0932	23.1152	22.2797	20.746	21.1817	21.5384	8.36251e+06	8.63289e+06	9.84978e+06	8.94839e+06	0.0722881	8.51828e+06	9.34206e+06	9.39813e+06	9.08616e+06	0.0442654	5.11198e+06	5.14739e+06	5.0156e+06	5.09165e+06	0.0109375	1.47202e+06	1.63182e+06	2.17193e+06	1.75859e+06	0.170287	2.7155e+06	2.15694e+06	2.26366e+06	2.3787e+06	0.101782	3.22359e+06	2.48881e+06	3.42509e+06	3.04583e+06	0.132105
P52758	RIDA	Ribonuclease UK114	3	3	-1.42068	0.00955491	+	24.0598	24.1276	24.9168	23.1016	23.0532	22.6874	1.89906e+07	1.68983e+07	1.65739e+07	1.74876e+07	0.0612431	1.79464e+07	1.90904e+07	1.79481e+07	1.83283e+07	0.0294017	3.03026e+07	3.14661e+07	3.32546e+07	3.16744e+07	0.0383312	8.00223e+06	9.42696e+06	9.57192e+06	9.00037e+06	0.0786932	8.79675e+06	8.04167e+06	9.27214e+06	8.70352e+06	0.0582112	6.99124e+06	6.53368e+06	6.73882e+06	6.75458e+06	0.0277043
Q9UEY8	ADD3	Gamma-adducin	18	17	1.62915	0.00963558	+	24.9672	23.9316	24.9316	26.4105	26.1604	26.1469	3.22385e+07	3.24978e+07	3.36462e+07	3.27942e+07	0.0186526	1.63721e+07	1.56675e+07	1.58767e+07	1.59721e+07	0.0184968	3.18317e+07	3.2823e+07	3.14132e+07	3.20226e+07	0.0184612	8.93719e+07	9.03895e+07	8.77706e+07	8.91773e+07	0.012088	7.2585e+07	7.48747e+07	7.75969e+07	7.50189e+07	0.0273083	7.234e+07	7.57319e+07	7.49585e+07	7.43435e+07	0.0195233
P45877	PPIC	Peptidyl-prolyl cis-trans isomerase C	2	2	-0.92184	0.00982846	+	21.1828	21.7881	21.425	20.4834	20.42	20.727	2.08484e+06	2.49769e+06	2.5588e+06	2.38045e+06	0.0884329	3.94698e+06	3.50893e+06	3.40791e+06	3.62127e+06	0.06461	2.65966e+06	2.85414e+06	2.93308e+06	2.81563e+06	0.040808	1.24825e+06	1.62402e+06	1.5255e+06	1.46592e+06	0.108525	1.4762e+06	1.44767e+06	1.28488e+06	1.40291e+06	0.0600692	1.70627e+06	1.73152e+06	1.76899e+06	1.73559e+06	0.0148469
Q9NVP1	DDX18	ATP-dependent RNA helicase DDX18	5	5	-0.321571	0.00991707		21.1516	21.0879	21.0941	20.8518	20.8607	20.6564	2.60527e+06	2.2102e+06	2.17324e+06	2.32957e+06	0.0839336	2.03818e+06	2.31203e+06	2.3363e+06	2.22884e+06	0.0606486	1.95358e+06	2.68676e+06	2.07523e+06	2.23852e+06	0.143317	1.98422e+06	2.14688e+06	1.54603e+06	1.89237e+06	0.134089	1.49881e+06	1.64738e+06	2.56623e+06	1.90414e+06	0.247924	2.01342e+06	1.65456e+06	1.29022e+06	1.65273e+06	0.178643
Q68E01	INTS3	Integrator complex subunit 3	2	2	0.789769	0.00995461	+	18.8876	18.624	18.3056	19.3343	19.4435	19.4087	491475	361689	601792	484985	0.202334	348422	458977	404469	403956	0.111733	306156	251312	415517	324328	0.210457	548211	748357	685344	660638	0.126478	535108	721836	882630	713192	0.199115	1.1093e+06	580821	396650	695590	0.434228
Q96RF0	SNX18	Sorting nexin-18	8	7	-0.854954	0.010035	+	24.5971	25.1211	24.6441	23.9935	24.0316	23.7723	2.47944e+07	2.57073e+07	2.56335e+07	2.53784e+07	0.0163157	3.63995e+07	3.64227e+07	3.6656e+07	3.64928e+07	0.00317373	2.73747e+07	2.50054e+07	2.62758e+07	2.62186e+07	0.0369241	1.67352e+07	1.69885e+07	1.63808e+07	1.67015e+07	0.0149214	1.52872e+07	1.89069e+07	1.72533e+07	1.71491e+07	0.0862749	1.4642e+07	1.50185e+07	1.33234e+07	1.4328e+07	0.0507241
P12270	TPR	Nucleoprotein TPR	11	11	0.514802	0.0100372	+	24.0854	23.9134	23.9672	24.391	24.7024	24.417	1.75279e+07	1.78963e+07	1.79979e+07	1.78074e+07	0.0113383	1.65362e+07	1.47749e+07	1.59822e+07	1.57644e+07	0.0466447	1.65821e+07	1.67856e+07	1.58933e+07	1.64203e+07	0.0232549	2.0952e+07	2.21181e+07	2.27802e+07	2.19501e+07	0.0344318	2.62438e+07	2.65584e+07	2.92038e+07	2.73354e+07	0.0485614	2.11676e+07	2.33706e+07	2.2734e+07	2.2424e+07	0.0412817
P00167	CYB5A	Cytochrome b5	3	3	-0.253845	0.0100763		24.3208	24.3713	24.3839	24.1976	24.0982	24.0186	2.05491e+07	1.98024e+07	2.25132e+07	2.09549e+07	0.0545582	2.17871e+07	2.23338e+07	2.09826e+07	2.17011e+07	0.0255734	2.22448e+07	2.10349e+07	2.23969e+07	2.18922e+07	0.0278346	2.03063e+07	1.74897e+07	1.99243e+07	1.92401e+07	0.0648386	1.78496e+07	1.81858e+07	1.78422e+07	1.79592e+07	0.00892354	1.55993e+07	1.73226e+07	1.80628e+07	1.69949e+07	0.0607277
P62424	RPL7A	60S ribosomal protein L7a	11	11	-0.263704	0.0101584		28.2273	28.2066	28.1736	28.0208	27.9622	27.8333	3.13972e+08	3.2386e+08	3.04889e+08	3.1424e+08	0.0246536	3.04289e+08	3.18221e+08	3.06753e+08	3.09754e+08	0.0195996	3.08567e+08	3.04346e+08	2.95341e+08	3.02751e+08	0.0182193	2.75853e+08	2.68836e+08	2.72312e+08	2.72334e+08	0.0105182	2.69161e+08	2.73569e+08	2.4173e+08	2.61487e+08	0.0538676	2.39373e+08	2.38365e+08	2.39706e+08	2.39148e+08	0.00238424
P23634	ATP2B4	Plasma membrane calcium-transporting ATPase 4	30	23	0.69179	0.0102113	+	27.3828	26.8974	27.0813	27.8564	27.8741	27.7064	1.74949e+08	1.74358e+08	1.77055e+08	1.75454e+08	0.00659676	1.20627e+08	1.2611e+08	1.28088e+08	1.24942e+08	0.0252605	1.37735e+08	1.46137e+08	1.42769e+08	1.42214e+08	0.024277	2.42567e+08	2.43239e+08	2.42304e+08	2.42703e+08	0.00162259	2.40231e+08	2.51151e+08	2.46221e+08	2.45868e+08	0.0181604	2.14725e+08	2.20642e+08	2.2182e+08	2.19062e+08	0.0141719
Q9UQ35	SRRM2	Serine/arginine repetitive matrix protein 2	7	7	0.325789	0.0102352		23.5285	23.5404	23.6209	23.9933	23.9043	23.7695	1.21835e+07	1.24917e+07	1.1748e+07	1.2141e+07	0.0251304	1.1588e+07	1.27869e+07	1.21351e+07	1.217e+07	0.0402677	1.28723e+07	1.32509e+07	1.24517e+07	1.28583e+07	0.0253848	1.65699e+07	1.6117e+07	1.73491e+07	1.66786e+07	0.0305084	1.51983e+07	1.63305e+07	1.56379e+07	1.57222e+07	0.0296413	1.3746e+07	1.45255e+07	1.46481e+07	1.43065e+07	0.0279247
Q8NI22	MCFD2	Multiple coagulation factor deficiency protein 2	2	2	-1.16278	0.0102365	+	24.3283	23.6029	23.8462	22.5935	22.6577	23.0378	2.48896e+07	2.26536e+07	1.56484e+07	2.10639e+07	0.186888	1.47125e+07	1.41895e+07	9.31994e+06	1.27406e+07	0.190587	1.67864e+07	1.42351e+07	1.42204e+07	1.50806e+07	0.0799825	7.5434e+06	6.6167e+06	4.82634e+06	6.32881e+06	0.178195	9.51561e+06	5.66982e+06	4.66534e+06	6.61692e+06	0.315903	1.03034e+07	7.70315e+06	7.82782e+06	8.61145e+06	0.139055
Q01082	SPTBN1	Spectrin beta chain, non-erythrocytic 1	88	80	0.760866	0.0102545	+	28.9372	28.4433	28.6595	29.6005	29.3088	29.4134	5.13187e+08	5.16122e+08	5.12218e+08	5.13842e+08	0.00323024	3.54747e+08	3.67604e+08	3.71327e+08	3.6456e+08	0.0194836	4.23993e+08	4.22821e+08	4.24258e+08	4.23691e+08	0.00147365	8.37422e+08	7.97573e+08	8.06087e+08	8.13694e+08	0.0210575	6.76903e+08	6.62386e+08	6.54438e+08	6.64576e+08	0.0139951	6.97758e+08	7.21669e+08	7.25739e+08	7.15055e+08	0.0172619
Q9BWD1	ACAT2	Acetyl-CoA acetyltransferase, cytosolic	10	9	0.805217	0.0102853	+	23.7389	23.8385	23.5285	24.5812	24.7234	24.217	1.38457e+07	1.39517e+07	1.42383e+07	1.40119e+07	0.0118349	1.58952e+07	1.4369e+07	1.46416e+07	1.49686e+07	0.044398	1.22644e+07	1.14273e+07	1.24624e+07	1.20514e+07	0.037228	2.20421e+07	2.69971e+07	2.62542e+07	2.50978e+07	0.0869344	2.69485e+07	2.87837e+07	2.7344e+07	2.7692e+07	0.0284782	1.87656e+07	1.95118e+07	2.02175e+07	1.94983e+07	0.0304017
P23284	PPIB	Peptidyl-prolyl cis-trans isomerase B	22	21	-0.416381	0.0102888	+	29.7064	29.9182	29.7982	29.4376	29.2583	29.4778	9.21116e+08	8.60507e+08	8.46448e+08	8.76024e+08	0.0369825	9.76102e+08	1.04824e+09	1.01926e+09	1.01454e+09	0.0292158	9.46834e+08	9.26219e+08	9.27772e+08	9.33608e+08	0.0100398	7.98118e+08	6.87479e+08	6.95699e+08	7.27099e+08	0.0692207	6.85435e+08	6.38476e+08	6.02436e+08	6.42115e+08	0.0529215	7.33724e+08	7.52454e+08	7.56848e+08	7.47675e+08	0.0134109
Q13683	ITGA7	Integrin alpha-7	4	4	2.50285	0.0103033	+	20.5823	18.8965	20.2185	22.5638	22.6298	22.0122	1.40102e+06	1.60584e+06	1.71001e+06	1.57229e+06	0.0816375	546667	335082	580847	487532	0.222955	1.44588e+06	1.21836e+06	997255	1.2205e+06	0.150066	5.97851e+06	5.96744e+06	6.63981e+06	6.19525e+06	0.050746	5.72666e+06	6.76426e+06	6.96772e+06	6.48621e+06	0.0837885	4.24235e+06	3.91509e+06	4.53207e+06	4.22984e+06	0.0595851
P05120	SERPINB2	Plasminogen activator inhibitor 2	4	4	-2.20958	0.0103868	+	24.1631	23.2768	22.6638	20.9473	20.9403	21.5874	1.82972e+07	1.87522e+07	1.93063e+07	1.87852e+07	0.0219657	9.91345e+06	1.08857e+07	9.68972e+06	1.01629e+07	0.0510808	6.33226e+06	6.88845e+06	6.71403e+06	6.64491e+06	0.0349533	1.76063e+06	2.20223e+06	2.10282e+06	2.02189e+06	0.0935485	1.45405e+06	2.40381e+06	2.17853e+06	2.01213e+06	0.201377	3.0887e+06	2.89731e+06	3.4672e+06	3.15107e+06	0.0751497
P18124	RPL7	60S ribosomal protein L7	8	8	-0.246808	0.0103893		27.3332	27.3388	27.2242	27.0917	27.0908	26.9733	1.70552e+08	1.68559e+08	1.68152e+08	1.69088e+08	0.00620365	1.74606e+08	1.65337e+08	1.69302e+08	1.69749e+08	0.0223698	1.54376e+08	1.58659e+08	1.57306e+08	1.5678e+08	0.0114028	1.4133e+08	1.42991e+08	1.44743e+08	1.43021e+08	0.00974338	1.43792e+08	1.41352e+08	1.43668e+08	1.42937e+08	0.00784881	1.27913e+08	1.32598e+08	1.34759e+08	1.31757e+08	0.0216877
P00533	EGFR	Epidermal growth factor receptor	4	4	0.998793	0.0105423	+	21.3156	20.6096	21.1457	22.0625	21.9098	22.0951	2.4418e+06	2.61761e+06	2.7651e+06	2.60817e+06	0.0506692	1.42257e+06	1.69477e+06	1.69171e+06	1.60302e+06	0.0796008	2.01688e+06	2.64621e+06	2.3087e+06	2.32393e+06	0.110652	4.75674e+06	4.01535e+06	4.37375e+06	4.38195e+06	0.0690842	3.76297e+06	3.97159e+06	4.09216e+06	3.94224e+06	0.0344938	4.15773e+06	4.65377e+06	4.6429e+06	4.4848e+06	0.0515778
P68371	TUBB4B	Tubulin beta-4B chain	38	3	-0.211152	0.0106433		28.2775	28.2411	28.1386	28.0039	27.9734	28.0465	3.23264e+08	3.21461e+08	3.31403e+08	3.25376e+08	0.0132916	3.10141e+08	3.1912e+08	3.22552e+08	3.17271e+08	0.0164934	3.0853e+08	2.87396e+08	2.90577e+08	2.95501e+08	0.0314857	2.90778e+08	2.59603e+08	2.57086e+08	2.69156e+08	0.0569335	2.94793e+08	2.62306e+08	2.3349e+08	2.6353e+08	0.095025	2.68841e+08	2.71624e+08	2.91247e+08	2.77237e+08	0.0359672
P53634	CTSC	Dipeptidyl peptidase 1	14	13	-2.15475	0.0106452	+	25.7296	26.2689	26.6208	23.4862	23.8445	24.8243	5.5951e+07	5.31465e+07	5.78159e+07	5.56378e+07	0.0344925	8.07188e+07	8.00312e+07	8.18177e+07	8.08559e+07	0.00909959	1.0181e+08	1.05204e+08	1.02571e+08	1.03195e+08	0.0140908	1.08839e+07	1.2133e+07	1.22346e+07	1.17505e+07	0.0522693	1.51861e+07	1.36245e+07	1.63771e+07	1.50626e+07	0.0748303	2.77814e+07	3.11e+07	3.02376e+07	2.97063e+07	0.047328
P20594	NPR2	Atrial natriuretic peptide receptor 2	4	4	1.1888	0.0107024	+	20.1825	19.9459	19.3645	21.0088	21.2006	20.85	1.04895e+06	1.11987e+06	1.41324e+06	1.19402e+06	0.132068	1.05847e+06	1.31336e+06	661364	1.01107e+06	0.265341	513641	679644	830618	674635	0.191887	2.11413e+06	2.29665e+06	1.9062e+06	2.10566e+06	0.0757535	2.15503e+06	2.54334e+06	2.51994e+06	2.4061e+06	0.0738917	1.64105e+06	2.06716e+06	1.97468e+06	1.8943e+06	0.0966114
O43895	XPNPEP2	Xaa-Pro aminopeptidase 2	4	4	1.8342	0.0107284	+	20.2302	20.3538	20.6096	22.9406	22.1642	21.5915	1.41839e+06	776375	1.48602e+06	1.22693e+06	0.260637	1.71154e+06	946906	1.36287e+06	1.34044e+06	0.23318	1.72529e+06	1.37452e+06	1.69086e+06	1.59689e+06	0.0988589	6.98064e+06	8.92265e+06	8.23992e+06	8.04774e+06	0.0999515	5.03189e+06	3.86399e+06	5.19832e+06	4.69806e+06	0.126367	3.2076e+06	3.55462e+06	2.72787e+06	3.16336e+06	0.107154
Q13242	SRSF9	Serine/arginine-rich splicing factor 9	2	2	-0.427435	0.0108526	+	20.7639	20.531	20.6282	20.2714	20.2891	20.0802	1.58827e+06	1.93741e+06	1.81594e+06	1.78054e+06	0.0812764	1.34488e+06	1.60315e+06	1.59719e+06	1.51507e+06	0.0794464	1.5405e+06	1.62713e+06	1.69458e+06	1.62073e+06	0.038912	1.69689e+06	883535	1.21646e+06	1.26563e+06	0.263794	1.43073e+06	1.49983e+06	913238	1.28127e+06	0.204298	1.20145e+06	1.22612e+06	897964	1.10851e+06	0.134612
P30050	RPL12	60S ribosomal protein L12	5	5	-0.244191	0.0108951		28.0653	28.0426	27.9176	27.7999	27.7863	27.7067	2.76002e+08	2.81448e+08	2.85159e+08	2.8087e+08	0.0133899	2.68182e+08	2.83037e+08	2.78225e+08	2.76481e+08	0.0223841	2.51714e+08	2.53986e+08	2.54876e+08	2.53525e+08	0.0052508	2.45606e+08	2.25008e+08	2.304e+08	2.33671e+08	0.0373241	2.28762e+08	2.39617e+08	2.26067e+08	2.31482e+08	0.0252992	2.13984e+08	2.25572e+08	2.17592e+08	2.19049e+08	0.022104
Q9NYL4	FKBP11	Peptidyl-prolyl cis-trans isomerase FKBP11	3	3	-0.494678	0.0109184	+	23.6865	23.8812	23.7777	23.4394	23.1132	23.3088	1.35218e+07	1.31117e+07	1.38681e+07	1.35005e+07	0.0228986	1.50499e+07	1.41484e+07	1.71558e+07	1.54514e+07	0.0815568	1.5264e+07	1.32319e+07	1.46485e+07	1.43815e+07	0.0591605	1.11226e+07	1.1985e+07	1.10185e+07	1.13754e+07	0.0380803	8.77046e+06	9.42036e+06	9.03003e+06	9.07361e+06	0.0294375	8.50196e+06	1.17895e+07	1.088e+07	1.03905e+07	0.133397
Q8NC51	SERBP1	Plasminogen activator inhibitor 1 RNA-binding protein	6	6	-0.407021	0.0109507	+	25.1618	24.9342	24.861	24.5714	24.5908	24.5738	4.0573e+07	3.61208e+07	3.59159e+07	3.75366e+07	0.0572439	3.21472e+07	3.04069e+07	3.36211e+07	3.20584e+07	0.0409781	3.30992e+07	2.88478e+07	2.94729e+07	3.04733e+07	0.0615046	2.44795e+07	2.43452e+07	2.59658e+07	2.49302e+07	0.0294562	2.46015e+07	2.57972e+07	2.54032e+07	2.52673e+07	0.0196885	2.46201e+07	2.6252e+07	2.40443e+07	2.49722e+07	0.0374435
Q9Y6B6	SAR1B	GTP-binding protein SAR1b	5	3	-0.561318	0.0109585	+	22.2445	22.5332	22.1682	21.8692	21.6984	21.6944	5.14554e+06	4.84667e+06	4.91459e+06	4.96893e+06	0.0257438	5.89375e+06	5.50386e+06	6.81148e+06	6.06969e+06	0.0903078	4.25991e+06	4.30978e+06	5.56956e+06	4.71308e+06	0.128571	2.94668e+06	4.28934e+06	4.25634e+06	3.83079e+06	0.16323	3.19441e+06	4.0214e+06	2.99336e+06	3.40306e+06	0.130727	3.18468e+06	3.05158e+06	3.94445e+06	3.39357e+06	0.115897
O75369	FLNB	Filamin-B	80	72	0.513365	0.0110605	+	29.4354	29.1015	29.1937	29.8711	29.6964	29.7031	7.19739e+08	7.19188e+08	7.38301e+08	7.25743e+08	0.0122396	5.72555e+08	5.76862e+08	5.79362e+08	5.7626e+08	0.00487826	6.08119e+08	6.08947e+08	6.25181e+08	6.14082e+08	0.0127915	9.96985e+08	9.73046e+08	9.77256e+08	9.82429e+08	0.010622	8.68239e+08	8.64938e+08	8.75467e+08	8.69548e+08	0.00505661	8.46937e+08	8.77302e+08	8.98872e+08	8.7437e+08	0.0243643
Q9Y6Y8	SEC23IP	SEC23-interacting protein	3	3	-0.433485	0.0110977	+	22.5917	22.6659	22.5837	22.2308	21.9992	22.3109	6.53288e+06	5.93418e+06	6.49614e+06	6.32106e+06	0.0433443	5.67724e+06	8.09697e+06	6.18901e+06	6.65441e+06	0.156471	5.87258e+06	5.92556e+06	7.06021e+06	6.28612e+06	0.0871433	4.71864e+06	5.19211e+06	4.85526e+06	4.922e+06	0.0404246	4.5224e+06	4.14517e+06	3.90849e+06	4.19202e+06	0.060307	4.85224e+06	5.10963e+06	5.64665e+06	5.20284e+06	0.0636089
Q96M27	PRRC1	Protein PRRC1	3	3	-0.384942	0.011238		23.5865	23.7894	23.6235	23.1989	23.398	23.2477	1.30027e+07	1.13273e+07	1.346e+07	1.25967e+07	0.0727796	1.67741e+07	1.36892e+07	1.30321e+07	1.44985e+07	0.112518	1.34382e+07	1.25339e+07	1.27976e+07	1.29233e+07	0.0293827	8.88801e+06	9.92611e+06	1.00714e+07	9.62849e+06	0.0547277	1.38901e+07	8.83557e+06	1.04339e+07	1.10532e+07	0.190847	9.44485e+06	1.03958e+07	1.00399e+07	9.96019e+06	0.039387
P46781	RPS9	40S ribosomal protein S9	8	8	-0.424077	0.0113592	+	25.8089	25.827	25.7846	25.546	25.3845	25.2177	5.99709e+07	5.76733e+07	5.87011e+07	5.87818e+07	0.0159867	5.7474e+07	6.07822e+07	6.03223e+07	5.95262e+07	0.0245811	5.82587e+07	5.62194e+07	5.89205e+07	5.77995e+07	0.0198879	5.39889e+07	4.65252e+07	4.64568e+07	4.89903e+07	0.0721505	4.60847e+07	4.30676e+07	4.22577e+07	4.38033e+07	0.0375933	3.79278e+07	4.04516e+07	3.86782e+07	3.90192e+07	0.027119
P62269	RPS18	40S ribosomal protein S18	7	7	-0.249327	0.0114504		25.7897	25.9014	25.742	25.5935	25.5911	25.5004	5.63509e+07	5.78824e+07	5.9779e+07	5.80041e+07	0.0241736	5.77944e+07	6.22504e+07	6.79866e+07	6.26772e+07	0.0665615	5.7083e+07	5.54672e+07	5.5805e+07	5.61184e+07	0.0124005	5.04092e+07	4.89482e+07	5.25385e+07	5.0632e+07	0.029115	5.15787e+07	5.07004e+07	4.93605e+07	5.05465e+07	0.0180449	4.49614e+07	4.81222e+07	4.93175e+07	4.7467e+07	0.0387164
P40429	RPL13A	60S ribosomal protein L13a	9	9	-0.303208	0.0115105		25.4994	25.2902	25.395	25.1498	25.0879	25.0373	4.92862e+07	4.86225e+07	4.43912e+07	4.74333e+07	0.0457081	4.13905e+07	4.17202e+07	3.99811e+07	4.10306e+07	0.0183812	4.38768e+07	4.28743e+07	4.56196e+07	4.41236e+07	0.025706	3.81193e+07	3.56982e+07	3.78623e+07	3.72266e+07	0.0291682	3.67554e+07	3.44448e+07	3.57851e+07	3.56617e+07	0.0265645	3.58086e+07	3.48211e+07	3.26709e+07	3.44335e+07	0.0380427
P61247	RPS3A	40S ribosomal protein S3a	10	10	-0.299241	0.0115127		28.0105	27.9379	27.8421	27.6872	27.6679	27.5377	2.81357e+08	2.67407e+08	2.62425e+08	2.70396e+08	0.0296332	2.48859e+08	2.57334e+08	2.65195e+08	2.57129e+08	0.0259432	2.39188e+08	2.40291e+08	2.42323e+08	2.40601e+08	0.00539757	2.18427e+08	2.12491e+08	2.17424e+08	2.16114e+08	0.0120047	2.24716e+08	2.08259e+08	2.06729e+08	2.13235e+08	0.0381851	1.84602e+08	1.94454e+08	2.0545e+08	1.94835e+08	0.0437073
Q6ZMZ3	SYNE3	Nesprin-3	4	3	0.672991	0.0115945	+	21.1143	21.2243	21.2933	21.9637	22.0821	21.6051	2.32984e+06	2.24102e+06	2.23705e+06	2.2693e+06	0.0188768	2.60794e+06	2.35244e+06	2.37651e+06	2.44563e+06	0.0471014	2.59036e+06	2.43736e+06	2.67436e+06	2.56736e+06	0.0382151	3.67009e+06	4.13982e+06	4.46437e+06	4.09143e+06	0.0796951	4.40406e+06	4.25509e+06	4.67212e+06	4.44376e+06	0.0388296	3.59115e+06	3.02268e+06	2.97012e+06	3.19465e+06	0.0880176
P17480	UBTF	Nucleolar transcription factor 1	5	5	0.367928	0.0117984		21.7389	21.6929	21.5915	22.019	22.1765	21.9316	3.80067e+06	3.20729e+06	3.50244e+06	3.50347e+06	0.069145	3.47637e+06	3.09912e+06	3.59022e+06	3.38857e+06	0.0619385	3.2193e+06	3.03591e+06	3.20998e+06	3.15506e+06	0.0267317	4.40338e+06	4.19739e+06	4.14734e+06	4.24937e+06	0.026075	4.15367e+06	4.69987e+06	5.37032e+06	4.74129e+06	0.104941	4.20143e+06	4.08332e+06	3.72386e+06	4.00287e+06	0.0507377
P21589	NT5E	5'-nucleotidase	34	34	0.950157	0.0118878	+	30.2647	29.6389	30.2869	31.0217	31.0864	30.933	1.24805e+09	1.29587e+09	1.3241e+09	1.28934e+09	0.024345	8.53777e+08	8.19566e+08	8.33915e+08	8.35753e+08	0.0167835	1.29291e+09	1.32097e+09	1.32361e+09	1.31249e+09	0.0105858	2.09064e+09	2.20572e+09	2.22927e+09	2.17521e+09	0.0278445	2.21744e+09	2.31871e+09	2.29656e+09	2.27757e+09	0.0190864	1.93876e+09	2.10887e+09	2.09658e+09	2.04807e+09	0.0378192
P14678;P63162	#N/A	Small nuclear ribonucleoprotein-associated proteins B and B'	6	6	0.155899	0.011916		25.8118	25.8741	25.8118	25.9738	26.0443	25.9473	5.75014e+07	6.05861e+07	5.84811e+07	5.88562e+07	0.0218661	5.68845e+07	6.48548e+07	6.26469e+07	6.1462e+07	0.0546678	5.7381e+07	6.15239e+07	5.76677e+07	5.88575e+07	0.0320948	6.86346e+07	6.51607e+07	6.3761e+07	6.58521e+07	0.0311129	6.87491e+07	6.91978e+07	6.95883e+07	6.91784e+07	0.00495629	6.01911e+07	6.54857e+07	6.85662e+07	6.47476e+07	0.0534184
O15198;P84022;Q15796	#N/A	Mothers against decapentaplegic homolog 9	3	3	0.82806	0.0119594	+	20.9388	20.5356	20.6096	21.7955	21.4626	21.3101	1.82599e+06	2.18925e+06	2.00925e+06	2.00816e+06	0.0738495	1.29844e+06	1.67777e+06	1.58487e+06	1.52036e+06	0.106183	1.48986e+06	1.53933e+06	1.7781e+06	1.60243e+06	0.0785341	3.42991e+06	3.69896e+06	3.79594e+06	3.6416e+06	0.042519	2.9154e+06	2.71461e+06	3.02817e+06	2.88606e+06	0.0449341	2.73066e+06	2.74643e+06	2.31382e+06	2.59697e+06	0.0771376
P60866	RPS20	40S ribosomal protein S20	3	3	-0.171145	0.0119942		26.374	26.4281	26.3112	26.2392	26.1752	26.1854	8.67518e+07	8.84119e+07	8.57396e+07	8.69678e+07	0.0126666	8.7978e+07	9.29095e+07	8.999e+07	9.02925e+07	0.0224227	8.07707e+07	8.49524e+07	8.40663e+07	8.32632e+07	0.021608	8.73567e+07	7.48796e+07	7.53988e+07	7.92117e+07	0.0727578	8.25262e+07	7.18783e+07	7.29139e+07	7.57728e+07	0.0632689	7.59385e+07	7.67864e+07	7.62153e+07	7.63134e+07	0.00462591
P04632	CAPNS1	Calpain small subunit 1	10	10	0.543152	0.0120874	+	26.8385	27.0711	26.9203	27.6181	27.5609	27.2803	1.12951e+08	1.23931e+08	1.23977e+08	1.20286e+08	0.0431229	1.36368e+08	1.41478e+08	1.43973e+08	1.40606e+08	0.022511	1.23609e+08	1.29421e+08	1.27133e+08	1.26721e+08	0.0188654	1.78294e+08	2.16202e+08	2.23439e+08	2.05978e+08	0.0961146	1.75501e+08	2.08371e+08	2.10522e+08	1.98131e+08	0.0808867	1.5971e+08	1.6334e+08	1.65248e+08	1.62766e+08	0.0141139
P36551	CPOX	Oxygen-dependent coproporphyrinogen-III oxidase, mitochondrial	7	7	0.435813	0.0120883	+	23.2332	23.0325	23.2096	23.6431	23.6971	23.4425	9.97187e+06	1.04326e+07	9.18879e+06	9.86441e+06	0.0520478	8.5294e+06	8.48349e+06	8.73712e+06	8.58334e+06	0.0128558	1.03849e+07	9.12531e+06	9.58651e+06	9.6989e+06	0.0536478	1.38492e+07	1.23587e+07	1.31333e+07	1.31137e+07	0.0464118	1.27318e+07	1.44816e+07	1.37015e+07	1.36383e+07	0.0524802	1.15927e+07	1.15661e+07	1.09868e+07	1.13819e+07	0.0245659
Q15005	SPCS2	Signal peptidase complex subunit 2	3	3	-0.382382	0.0121034		24.433	24.6047	24.6055	24.0441	24.2732	24.1788	2.15252e+07	2.24871e+07	2.39389e+07	2.26504e+07	0.0438017	2.50461e+07	2.52205e+07	2.62733e+07	2.55133e+07	0.0212464	2.47686e+07	2.66748e+07	2.51356e+07	2.55263e+07	0.0323518	1.82923e+07	1.61026e+07	1.74998e+07	1.72982e+07	0.052329	2.26442e+07	1.97134e+07	1.84657e+07	2.02744e+07	0.0863824	1.93031e+07	1.92568e+07	1.84139e+07	1.89912e+07	0.0215208
Q13217	DNAJC3	DnaJ homolog subfamily C member 3	6	5	-0.525571	0.012237	+	23.3392	23.7466	23.5351	23.0713	22.9799	22.993	1.17844e+07	9.83315e+06	1.02183e+07	1.0612e+07	0.0795158	1.50354e+07	1.32591e+07	1.39302e+07	1.40749e+07	0.0520333	1.25856e+07	1.26491e+07	1.12314e+07	1.21554e+07	0.0537934	8.02342e+06	9.10214e+06	9.31477e+06	8.81344e+06	0.0641446	8.60387e+06	7.30481e+06	8.90923e+06	8.27264e+06	0.0840865	8.44154e+06	7.84409e+06	8.7583e+06	8.34798e+06	0.0454055
O43172	PRPF4	U4/U6 small nuclear ribonucleoprotein Prp4	4	3	0.477268	0.0122543	+	19.7455	19.9742	20.1079	20.4676	20.3645	20.4273	738276	1.02131e+06	878557	879380	0.131397	1.01512e+06	836493	1.24781e+06	1.03314e+06	0.163002	1.33157e+06	1.04346e+06	1.00941e+06	1.12815e+06	0.128096	1.19113e+06	1.24318e+06	1.92648e+06	1.4536e+06	0.2305	1.50673e+06	1.3947e+06	1.14036e+06	1.34726e+06	0.113777	1.58614e+06	1.30874e+06	1.33917e+06	1.41135e+06	0.0880121
P84098	RPL19	60S ribosomal protein L19	3	3	-0.308992	0.012351		26.5916	26.5498	26.4074	26.2801	26.2154	26.1264	1.01563e+08	9.63668e+07	1.05455e+08	1.01128e+08	0.0368141	8.63429e+07	1.01869e+08	1.06506e+08	9.82393e+07	0.0877704	8.22355e+07	8.81104e+07	9.66784e+07	8.90081e+07	0.0666272	8.42271e+07	8.00809e+07	8.01565e+07	8.14882e+07	0.0237698	7.5041e+07	7.82215e+07	8.04812e+07	7.79146e+07	0.0286408	7.15509e+07	7.38029e+07	7.44057e+07	7.32532e+07	0.0167716
Q9BUJ2	HNRNPUL1	Heterogeneous nuclear ribonucleoprotein U-like protein 1	19	17	0.435306	0.0124104	+	25.2133	25.3679	25.5492	25.8528	25.7619	25.8215	3.78105e+07	3.84091e+07	4.05125e+07	3.89107e+07	0.0297782	4.35338e+07	4.49201e+07	4.13862e+07	4.32801e+07	0.0335912	4.79131e+07	4.98698e+07	4.95401e+07	4.91077e+07	0.0174174	6.09022e+07	6.27344e+07	5.81992e+07	6.06119e+07	0.0307335	5.46355e+07	5.9049e+07	5.70698e+07	5.69181e+07	0.031712	6.0139e+07	5.80211e+07	5.96374e+07	5.92658e+07	0.0152474
Q9Y5M8	SRPRB	Signal recognition particle receptor subunit beta	3	3	-0.792081	0.0125051	+	21.6974	21.6514	21.3368	21.0496	20.5675	20.6922	3.24348e+06	3.63584e+06	3.32253e+06	3.40062e+06	0.0498238	3.24453e+06	3.30681e+06	3.33062e+06	3.29399e+06	0.0110196	2.51586e+06	2.66256e+06	2.76739e+06	2.64861e+06	0.0389489	2.16504e+06	2.44405e+06	1.90239e+06	2.1705e+06	0.101897	1.32764e+06	1.55388e+06	1.7803e+06	1.55394e+06	0.118922	1.38881e+06	1.64404e+06	2.04997e+06	1.69427e+06	0.160687
Q9Y2A7	NCKAP1	Nck-associated protein 1	4	4	0.251009	0.0125056		23.48	23.4425	23.3376	23.7492	23.6431	23.6209	1.14323e+07	1.19845e+07	1.16394e+07	1.16854e+07	0.0194938	1.1772e+07	1.04859e+07	1.19914e+07	1.14165e+07	0.0581655	9.36564e+06	1.02304e+07	1.21633e+07	1.05865e+07	0.110479	1.24618e+07	1.52091e+07	1.45714e+07	1.40808e+07	0.0833777	1.16103e+07	1.46295e+07	1.29968e+07	1.30789e+07	0.0943449	1.22738e+07	1.22814e+07	1.40999e+07	1.2885e+07	0.0666696
Q9UKG1	APPL1	DCC-interacting protein 13-alpha	2	2	0.501401	0.0125075	+	19.692	19.692	19.7389	20.1206	20.4375	20.0691	717250	1.03832e+06	783962	846512	0.163423	578471	918075	1.04464e+06	847063	0.232364	802848	779415	1.0442e+06	875488	0.136703	991230	1.0705e+06	1.34643e+06	1.13605e+06	0.134006	1.18263e+06	1.36909e+06	1.70567e+06	1.41913e+06	0.152518	1.13265e+06	914629	1.24424e+06	1.09717e+06	0.124758
Q9P2E9	RRBP1	Ribosome-binding protein 1	18	18	-0.425029	0.0125337	+	27.9563	27.9002	27.7121	27.5406	27.3147	27.4381	2.62653e+08	2.65846e+08	2.52793e+08	2.60431e+08	0.0213317	2.54413e+08	2.55507e+08	2.4155e+08	2.5049e+08	0.0252992	2.25855e+08	2.10395e+08	2.2335e+08	2.19867e+08	0.0308139	2.02679e+08	1.91088e+08	1.91924e+08	1.9523e+08	0.0270336	1.69535e+08	1.65277e+08	1.66006e+08	1.66939e+08	0.0111377	1.80997e+08	1.81032e+08	1.835e+08	1.81843e+08	0.00644306
Q99536	VAT1	Synaptic vesicle membrane protein VAT-1 homolog	24	23	0.485307	0.0125448	+	29.362	29.0505	29.2262	29.6527	29.8309	29.611	6.82824e+08	7.08247e+08	6.77569e+08	6.89547e+08	0.0194274	5.4657e+08	5.54442e+08	5.68401e+08	5.56471e+08	0.0162224	6.15668e+08	6.28521e+08	6.40491e+08	6.28227e+08	0.0161343	8.46316e+08	8.34741e+08	8.51937e+08	8.44332e+08	0.00847915	9.39903e+08	9.52475e+08	9.72134e+08	9.54838e+08	0.0138912	7.98097e+08	8.30563e+08	8.31826e+08	8.20162e+08	0.0190342
O75832	PSMD10	26S proteasome non-ATPase regulatory subunit 10	3	3	-0.612174	0.0127132	+	22.0028	21.7635	21.6702	21.125	21.4029	21.0721	4.56593e+06	4.2283e+06	3.81276e+06	4.20233e+06	0.0732992	3.55756e+06	3.12676e+06	3.99642e+06	3.56025e+06	0.0997238	3.78689e+06	2.97675e+06	3.24813e+06	3.33726e+06	0.100887	2.66169e+06	2.26852e+06	1.93079e+06	2.287e+06	0.130597	2.56626e+06	2.95354e+06	2.79857e+06	2.77279e+06	0.0573982	1.92162e+06	2.37281e+06	2.31936e+06	2.2046e+06	0.0913016
P10809	HSPD1	60 kDa heat shock protein, mitochondrial	32	29	0.455954	0.0127534	+	29.5222	29.5203	29.5278	29.9259	30.1842	29.8279	7.66583e+08	7.67579e+08	7.7846e+08	7.70874e+08	0.0069785	7.60266e+08	7.66896e+08	7.82246e+08	7.69803e+08	0.0119585	7.69433e+08	7.70397e+08	7.81583e+08	7.73805e+08	0.00712631	9.97723e+08	1.02701e+09	1.0414e+09	1.02204e+09	0.0177798	1.18282e+09	1.224e+09	1.24146e+09	1.2161e+09	0.0202172	9.31145e+08	9.51386e+08	9.75438e+08	9.52656e+08	0.0190045
Q13435	SF3B2	Splicing factor 3B subunit 2	13	13	0.17269	0.012763		24.9361	24.9539	24.9847	25.1565	25.1795	25.0567	3.27009e+07	3.28783e+07	3.08392e+07	3.21395e+07	0.0286965	3.13759e+07	3.65093e+07	2.96156e+07	3.25003e+07	0.0899829	3.30515e+07	3.26619e+07	3.3769e+07	3.31608e+07	0.0138269	3.79249e+07	3.64736e+07	3.78376e+07	3.7412e+07	0.0177616	3.87316e+07	3.7393e+07	3.78713e+07	3.79986e+07	0.0145755	3.54692e+07	3.36673e+07	3.55672e+07	3.49013e+07	0.0250258
Q9Y3U8	RPL36	60S ribosomal protein L36	8	8	-0.280484	0.0128427		25.7273	25.6221	25.5054	25.3649	25.327	25.3215	5.8396e+07	5.51364e+07	5.31201e+07	5.55509e+07	0.0391305	5.06185e+07	5.32421e+07	5.10768e+07	5.16458e+07	0.0221543	4.85028e+07	4.62121e+07	4.81791e+07	4.76313e+07	0.0212513	4.58108e+07	4.15455e+07	4.22811e+07	4.32125e+07	0.0430819	4.55044e+07	4.17302e+07	3.90368e+07	4.20905e+07	0.063023	4.30088e+07	4.08604e+07	4.19204e+07	4.19299e+07	0.0209179
Q9HC07	TMEM165	Transmembrane protein 165	2	2	-0.233041	0.0129928		24.1269	24.1452	24.2419	23.8626	24.005	23.9472	1.94663e+07	1.86721e+07	1.68218e+07	1.83201e+07	0.0604753	1.64401e+07	1.80242e+07	2.1195e+07	1.85531e+07	0.106553	1.90828e+07	1.96083e+07	2.08295e+07	1.98402e+07	0.0368784	1.57002e+07	1.51259e+07	1.49331e+07	1.52531e+07	0.0213616	1.63893e+07	1.67789e+07	1.73396e+07	1.68359e+07	0.023168	1.45253e+07	1.66766e+07	1.73223e+07	1.61747e+07	0.0739247
Q02809	PLOD1	Procollagen-lysine,2-oxoglutarate 5-dioxygenase 1	21	21	-0.517242	0.0130236	+	26.3421	26.4607	26.0788	25.6967	25.8507	25.7824	8.58117e+07	8.37207e+07	8.5665e+07	8.50658e+07	0.011203	8.93086e+07	9.19023e+07	9.58542e+07	9.2355e+07	0.0291412	7.03352e+07	6.97722e+07	7.2519e+07	7.08755e+07	0.016715	5.51637e+07	5.46191e+07	5.33673e+07	5.43834e+07	0.0138288	5.8545e+07	6.177e+07	6.12238e+07	6.05129e+07	0.023289	5.58176e+07	5.67927e+07	6.05313e+07	5.77139e+07	0.0352019
O14828	SCAMP3	Secretory carrier-associated membrane protein 3	4	4	-0.286943	0.0131158		23.3988	23.3343	23.4906	23.1963	23.1402	23.0265	1.20334e+07	1.04354e+07	1.07106e+07	1.10598e+07	0.0630704	1.01198e+07	1.07948e+07	1.08143e+07	1.05763e+07	0.0305314	1.22741e+07	1.08364e+07	1.22479e+07	1.17861e+07	0.0569871	1.04485e+07	9.94618e+06	8.43825e+06	9.61099e+06	0.0888814	9.32163e+06	9.15153e+06	9.26066e+06	9.24461e+06	0.00761135	8.34996e+06	8.30391e+06	8.978e+06	8.54395e+06	0.0359891
P30101	PDIA3	Protein disulfide-isomerase A3	30	29	-0.178478	0.0131848		30.5036	30.6282	30.5587	30.3899	30.3454	30.4197	1.51857e+09	1.50908e+09	1.53913e+09	1.52226e+09	0.00823721	1.61796e+09	1.66011e+09	1.70063e+09	1.65957e+09	0.0203375	1.56811e+09	1.58354e+09	1.59308e+09	1.58158e+09	0.00650637	1.40352e+09	1.38202e+09	1.43515e+09	1.4069e+09	0.0155093	1.33754e+09	1.37465e+09	1.3804e+09	1.3642e+09	0.0139253	1.34351e+09	1.48851e+09	1.47696e+09	1.43633e+09	0.0458117
Q9Y2D4	EXOC6B	Exocyst complex component 6B	2	2	0.396545	0.0133277		20.4067	20.3211	20.3321	20.8651	20.5731	20.8113	1.21459e+06	1.41382e+06	1.53954e+06	1.38932e+06	0.0962987	1.52201e+06	1.30138e+06	1.11415e+06	1.31251e+06	0.127005	1.2104e+06	1.36974e+06	1.38316e+06	1.3211e+06	0.0593967	1.67092e+06	1.5785e+06	2.47972e+06	1.90971e+06	0.21198	1.53906e+06	1.62338e+06	1.52569e+06	1.56271e+06	0.0276717	1.89363e+06	1.80877e+06	1.8097e+06	1.83737e+06	0.0216545
P09601	HMOX1	Heme oxygenase 1	6	6	-0.685092	0.0133319	+	25.1811	25.7267	25.3793	24.7804	24.7618	24.6895	3.68178e+07	3.68752e+07	4.04368e+07	3.80433e+07	0.0444936	5.3517e+07	5.74132e+07	5.56479e+07	5.5526e+07	0.0286883	3.83798e+07	4.67316e+07	4.58217e+07	4.36444e+07	0.0857178	2.82539e+07	2.79068e+07	3.02914e+07	2.88174e+07	0.0365012	2.63354e+07	2.8607e+07	3.04026e+07	2.84483e+07	0.0584995	2.57412e+07	2.77793e+07	2.76527e+07	2.70577e+07	0.0344574
P26440	IVD	Isovaleryl-CoA dehydrogenase, mitochondrial	7	7	0.515683	0.0133706	+	24.9803	24.9406	24.9043	25.3444	25.6971	25.3307	3.03336e+07	3.41352e+07	3.48798e+07	3.31162e+07	0.0601203	3.15352e+07	3.21301e+07	3.27934e+07	3.21529e+07	0.0159829	2.94042e+07	3.30022e+07	3.18621e+07	3.14228e+07	0.0477783	4.12886e+07	4.3819e+07	4.27541e+07	4.26206e+07	0.0243393	5.41361e+07	5.46062e+07	5.44031e+07	5.43818e+07	0.00353983	4.18448e+07	4.13562e+07	4.3439e+07	4.22133e+07	0.0210681
Q13228	SELENBP1	Selenium-binding protein 1	10	10	0.610369	0.013387	+	23.5638	23.2679	23.7594	24.1095	24.1795	24.1332	1.31187e+07	1.25174e+07	1.1638e+07	1.24247e+07	0.0489387	1.02329e+07	1.0608e+07	9.42624e+06	1.0089e+07	0.0488694	1.35941e+07	1.37909e+07	1.50864e+07	1.41571e+07	0.0467611	1.80306e+07	1.84091e+07	1.7959e+07	1.81329e+07	0.0108906	1.86259e+07	1.88533e+07	1.95662e+07	1.90152e+07	0.0210666	1.78767e+07	1.86878e+07	1.87329e+07	1.84324e+07	0.0213433
P09619	PDGFRB	Platelet-derived growth factor receptor beta	13	13	0.383783	0.0134744		26.4598	26.4738	26.2408	26.7771	26.8623	26.6865	9.38423e+07	9.23143e+07	9.06715e+07	9.22761e+07	0.0140315	8.60713e+07	9.62861e+07	9.72888e+07	9.32154e+07	0.054371	7.65786e+07	8.24194e+07	7.90267e+07	7.93416e+07	0.0301838	1.17137e+08	1.11402e+08	1.16949e+08	1.15163e+08	0.0230996	1.1999e+08	1.24772e+08	1.22306e+08	1.22356e+08	0.0159587	1.07007e+08	1.06177e+08	1.12222e+08	1.08469e+08	0.0246666
Q9BPW8	NIPSNAP1	Protein NipSnap homolog 1	8	7	0.745911	0.0135873	+	24.48	24.4488	24.9539	25.4041	25.4738	25.2426	2.36607e+07	2.34195e+07	2.31404e+07	2.34069e+07	0.00908344	2.19229e+07	2.25855e+07	2.42188e+07	2.29091e+07	0.0421147	3.22146e+07	3.1005e+07	3.43494e+07	3.2523e+07	0.042513	4.44602e+07	4.44663e+07	4.4419e+07	4.44485e+07	0.000472771	4.50449e+07	4.65951e+07	4.80911e+07	4.6577e+07	0.0267016	3.42541e+07	4.51514e+07	3.9554e+07	3.96532e+07	0.112207
Q15642	TRIP10	Cdc42-interacting protein 4	3	2	0.7752	0.0136564	+	21.0559	21.2419	21.5545	22.1457	21.8346	22.1976	2.02108e+06	2.29001e+06	2.23272e+06	2.18127e+06	0.0530245	2.66e+06	2.22942e+06	2.54652e+06	2.47865e+06	0.0735148	3.28833e+06	2.75292e+06	3.20288e+06	3.08138e+06	0.0762185	4.16625e+06	4.64331e+06	5.12431e+06	4.64462e+06	0.0842113	3.28591e+06	4.09558e+06	3.82853e+06	3.73667e+06	0.0901516	4.86954e+06	4.79287e+06	4.75889e+06	4.8071e+06	0.00962737
P27658	COL8A1	Collagen alpha-1(VIII) chain	8	8	-1.79858	0.0136598	+	25.8484	27.0288	26.9923	24.4833	25.102	24.8885	5.85125e+07	6.03999e+07	6.23339e+07	6.04154e+07	0.0258236	1.43246e+08	1.34671e+08	1.32861e+08	1.36926e+08	0.0330789	1.26333e+08	1.33033e+08	1.41151e+08	1.33506e+08	0.0453822	2.1831e+07	2.44487e+07	2.40813e+07	2.34537e+07	0.0493393	3.25605e+07	3.37877e+07	4.16894e+07	3.60126e+07	0.112329	3.00896e+07	3.14677e+07	3.16199e+07	3.10591e+07	0.0221619
Q16740	CLPP	ATP-dependent Clp protease proteolytic subunit, mitochondrial	3	2	0.439718	0.0136901	+	22.4996	22.6074	22.7348	23.0037	23.2096	22.9477	5.67811e+06	6.3622e+06	5.7491e+06	5.9298e+06	0.0517924	6.35626e+06	6.59059e+06	6.22156e+06	6.38947e+06	0.0238634	6.94973e+06	7.15119e+06	6.82495e+06	6.97529e+06	0.0192688	8.23387e+06	8.425e+06	8.57322e+06	8.4107e+06	0.0165159	9.74172e+06	9.62009e+06	9.7294e+06	9.69707e+06	0.00563736	7.73308e+06	7.44423e+06	9.07965e+06	8.08565e+06	0.0881419
Q32P28	P3H1	Prolyl 3-hydroxylase 1	15	15	-0.67956	0.0137804	+	26.9728	27.1423	26.656	26.3852	26.2281	26.1191	1.27354e+08	1.33184e+08	1.34592e+08	1.3171e+08	0.0237906	1.54615e+08	1.47399e+08	1.42393e+08	1.48136e+08	0.0338649	1.04256e+08	1.05422e+08	1.07557e+08	1.05745e+08	0.0129243	8.41804e+07	9.031e+07	8.84489e+07	8.76464e+07	0.0292758	7.30014e+07	8.09293e+07	8.1887e+07	7.86059e+07	0.0506602	7.17202e+07	7.27486e+07	7.41893e+07	7.2886e+07	0.0138936
P07093	SERPINE2	Glia-derived nexin	12	11	-0.642246	0.0137958	+	26.2617	26.0688	26.4563	25.5619	25.4748	25.8234	7.47959e+07	8.46302e+07	8.19389e+07	8.0455e+07	0.0515779	6.974e+07	6.78414e+07	7.35779e+07	7.03865e+07	0.0339001	9.72287e+07	8.82179e+07	9.07742e+07	9.20736e+07	0.0411808	4.51685e+07	5.48894e+07	4.85405e+07	4.95328e+07	0.081362	4.65582e+07	4.59753e+07	4.73577e+07	4.66304e+07	0.0121522	5.66005e+07	6.34129e+07	5.81139e+07	5.93758e+07	0.0491916
P53597	SUCLG1	Succinyl-CoA ligase [ADP/GDP-forming] subunit alpha, mitochondrial	10	9	0.487652	0.0138848	+	25.8904	26.0422	26.0894	26.4846	26.673	26.3273	6.02541e+07	6.04124e+07	6.58492e+07	6.21719e+07	0.0418365	6.90837e+07	6.74548e+07	7.06446e+07	6.9061e+07	0.018858	7.15313e+07	7.2327e+07	7.04091e+07	7.14225e+07	0.0110153	8.49515e+07	9.96727e+07	9.71761e+07	9.39334e+07	0.0684791	1.06559e+08	1.00783e+08	1.12862e+08	1.06734e+08	0.0462164	8.40407e+07	8.57608e+07	8.27406e+07	8.41807e+07	0.0146942
P25685	DNAJB1	DnaJ homolog subfamily B member 1	4	4	0.221149	0.0140079		22.5615	22.6006	22.5069	22.823	22.6865	22.823	5.34925e+06	6.79496e+06	6.43073e+06	6.19164e+06	0.0991566	6.35284e+06	5.82324e+06	6.90098e+06	6.35902e+06	0.0691945	4.95677e+06	6.52817e+06	6.40664e+06	5.96386e+06	0.119695	8.73514e+06	5.91187e+06	7.61692e+06	7.42131e+06	0.156423	6.1394e+06	8.03515e+06	6.07873e+06	6.75109e+06	0.134541	6.45374e+06	6.94946e+06	8.84757e+06	7.41692e+06	0.139096
P43304	GPD2	Glycerol-3-phosphate dehydrogenase, mitochondrial	9	9	0.693846	0.0142544	+	24.5105	24.1174	24.2535	25.0317	25.1719	24.7594	2.27182e+07	2.4197e+07	2.48726e+07	2.39293e+07	0.0375958	1.81114e+07	1.81698e+07	1.83381e+07	1.82064e+07	0.00527788	1.88856e+07	2.02347e+07	2.08156e+07	1.99786e+07	0.0404655	3.37516e+07	3.55124e+07	3.35897e+07	3.42846e+07	0.0253962	3.76467e+07	3.7713e+07	3.79517e+07	3.77705e+07	0.00346839	2.70674e+07	2.78944e+07	3.01177e+07	2.83599e+07	0.0454165
P12268	IMPDH2	Inosine-5'-monophosphate dehydrogenase 2	10	10	-0.948149	0.0143626	+	25.1164	25.0751	24.475	23.8209	23.8678	24.1333	3.75831e+07	3.59617e+07	3.55752e+07	3.63733e+07	0.0239151	3.1538e+07	3.67688e+07	3.77387e+07	3.53485e+07	0.0770439	2.27804e+07	2.47904e+07	2.23847e+07	2.33185e+07	0.0451678	1.52584e+07	1.41818e+07	1.50154e+07	1.48185e+07	0.0311133	1.52438e+07	1.5008e+07	1.56743e+07	1.53087e+07	0.0180193	1.80568e+07	1.89378e+07	1.82091e+07	1.84012e+07	0.0208947
Q15392	DHCR24	Delta(24)-sterol reductase	10	10	0.932655	0.0143785	+	24.1565	23.6757	24.1253	24.7895	25.2426	24.7234	1.90019e+07	1.81675e+07	1.89154e+07	1.86949e+07	0.0200392	1.54559e+07	1.23577e+07	1.2335e+07	1.33829e+07	0.109532	1.74029e+07	1.81416e+07	1.93837e+07	1.83094e+07	0.0446379	3.11084e+07	2.95477e+07	2.63612e+07	2.90057e+07	0.0681092	4.6353e+07	3.66196e+07	3.6053e+07	3.96752e+07	0.119157	2.88426e+07	2.61489e+07	2.81626e+07	2.7718e+07	0.0412631
Q05682	CALD1	Caldesmon	12	12	-1.01443	0.0144446	+	28.1009	27.8958	27.4404	26.709	26.5966	27.0882	2.92828e+08	2.89869e+08	2.80943e+08	2.8788e+08	0.0175485	2.56202e+08	2.55532e+08	2.37442e+08	2.49725e+08	0.0347979	1.81882e+08	1.79821e+08	1.84694e+08	1.82132e+08	0.0109654	1.21786e+08	1.07362e+08	9.9951e+07	1.09699e+08	0.0826431	1.1999e+08	9.69437e+07	8.75024e+07	1.01479e+08	0.134462	1.41304e+08	1.4415e+08	1.42584e+08	1.42679e+08	0.00815754
P23526	AHCY	Adenosylhomocysteinase	4	4	-0.694998	0.0146553	+	22.5183	22.5273	22.0505	21.6121	21.6068	21.7922	6.61649e+06	5.90764e+06	5.49749e+06	6.0072e+06	0.0769448	6.16615e+06	6.53204e+06	5.43671e+06	6.04497e+06	0.0753188	4.32036e+06	4.28296e+06	4.42786e+06	4.34373e+06	0.0141394	3.06352e+06	3.60088e+06	2.95169e+06	3.20536e+06	0.088406	3.15035e+06	3.1316e+06	3.29907e+06	3.19368e+06	0.0234588	3.99309e+06	3.39846e+06	3.5037e+06	3.63175e+06	0.0713419
Q96KG9	SCYL1	N-terminal kinase-like protein	3	2	-0.2482	0.0147206		23.2752	23.1889	23.2221	22.9776	22.8869	23.077	9.79064e+06	1.06276e+07	1.00357e+07	1.01513e+07	0.0346077	1.014e+07	9.75148e+06	8.79454e+06	9.562e+06	0.0591277	9.69538e+06	9.52053e+06	1.01389e+07	9.78492e+06	0.0265971	9.09192e+06	8.45689e+06	7.23e+06	8.2596e+06	0.0935663	8.58625e+06	8.52225e+06	6.15997e+06	7.75616e+06	0.145559	9.13332e+06	9.29867e+06	8.11386e+06	8.84862e+06	0.0592092
Q9BYC5	FUT8	Alpha-(1,6)-fucosyltransferase	3	3	-0.777244	0.0148956	+	20.6905	21.2334	20.9688	20.2155	19.9892	20.3563	1.7701e+06	1.69686e+06	1.60983e+06	1.69226e+06	0.0387136	2.72356e+06	2.45332e+06	2.21947e+06	2.46545e+06	0.0835445	1.79225e+06	1.7484e+06	2.61626e+06	2.0523e+06	0.194503	1.21578e+06	1.17958e+06	1.25713e+06	1.2175e+06	0.026025	1.01439e+06	741987	1.36594e+06	1.04077e+06	0.245404	1.19341e+06	1.72644e+06	1.10715e+06	1.34233e+06	0.204029
O94874	UFL1	E3 UFM1-protein ligase 1	3	3	-0.594307	0.0149714	+	22.636	22.6156	22.2204	21.9867	21.8994	21.8031	5.53636e+06	6.755e+06	7.26326e+06	6.51821e+06	0.111168	6.42212e+06	6.83538e+06	6.02232e+06	6.4266e+06	0.0516521	4.94392e+06	4.92031e+06	4.79533e+06	4.88652e+06	0.0133421	4.39685e+06	3.68991e+06	4.38039e+06	4.15572e+06	0.0792745	4.12145e+06	4.17608e+06	3.4375e+06	3.91167e+06	0.085906	3.71567e+06	3.54642e+06	3.71557e+06	3.65922e+06	0.021797
P61604	HSPE1	10 kDa heat shock protein, mitochondrial	4	4	0.462045	0.0151649	+	25.772	25.7389	25.9738	26.1833	26.4614	26.2262	5.68402e+07	6.03711e+07	5.46504e+07	5.72872e+07	0.0411393	5.64684e+07	5.95883e+07	5.2034e+07	5.60303e+07	0.0553191	6.75269e+07	6.41941e+07	6.61189e+07	6.59466e+07	0.0207143	8.16673e+07	7.58379e+07	7.09466e+07	7.61506e+07	0.0575477	1.00802e+08	9.36379e+07	8.26794e+07	9.23731e+07	0.0806771	8.11311e+07	7.95308e+07	7.48584e+07	7.85068e+07	0.0338979
P41091	EIF2S3	Eukaryotic translation initiation factor 2 subunit 3	8	8	-0.434827	0.0152761	+	26.2051	26.1917	26.0645	25.8555	25.5311	25.7703	8.08325e+07	7.70816e+07	7.41747e+07	7.73629e+07	0.0352276	8.47642e+07	7.41441e+07	7.10356e+07	7.66479e+07	0.0766843	7.06607e+07	7.26516e+07	6.72153e+07	7.01758e+07	0.0320006	6.36481e+07	5.98788e+07	5.86066e+07	6.07112e+07	0.0352604	5.23984e+07	4.56549e+07	4.74056e+07	4.84863e+07	0.0589266	5.8302e+07	5.59449e+07	5.74516e+07	5.72328e+07	0.0170288
P09486	SPARC	SPARC	6	6	-0.892812	0.0152882	+	24.9062	25.4196	24.7342	24.2605	24.1258	23.9953	3.23566e+07	3.07629e+07	3.1208e+07	3.14425e+07	0.0213537	4.48122e+07	4.28103e+07	4.70211e+07	4.48812e+07	0.038318	2.79898e+07	2.84599e+07	2.72777e+07	2.79091e+07	0.0174136	1.87986e+07	1.97576e+07	2.17362e+07	2.00975e+07	0.0608601	1.6161e+07	1.81097e+07	2.06464e+07	1.83057e+07	0.100318	1.56715e+07	1.7721e+07	1.6776e+07	1.67228e+07	0.0500827
Q15287	RNPS1	RNA-binding protein with serine-rich domain 1	5	5	0.1421	0.0153957		24.4298	24.48	24.4738	24.5463	24.654	24.6096	2.30453e+07	2.33067e+07	2.13265e+07	2.25595e+07	0.0389359	2.26931e+07	2.52722e+07	2.22364e+07	2.34006e+07	0.0571149	2.17513e+07	2.49954e+07	2.30826e+07	2.32764e+07	0.0572017	2.38316e+07	2.4506e+07	2.52332e+07	2.45236e+07	0.0233384	2.55447e+07	2.93095e+07	2.4283e+07	2.63791e+07	0.080943	2.42926e+07	2.59652e+07	2.65707e+07	2.56095e+07	0.0376214
Q86SX6	GLRX5	Glutaredoxin-related protein 5, mitochondrial	3	3	0.434764	0.0154649	+	22.1488	22.1946	22.4825	22.7327	22.7369	22.6606	4.82398e+06	4.98537e+06	4.14065e+06	4.65e+06	0.0787403	5.35212e+06	3.84833e+06	5.19252e+06	4.79766e+06	0.140575	5.8827e+06	5.64934e+06	6.03871e+06	5.85692e+06	0.0273181	6.99032e+06	7.40778e+06	6.4978e+06	6.9653e+06	0.0533959	7.26199e+06	6.9006e+06	6.81486e+06	6.99248e+06	0.0277092	6.41538e+06	6.17415e+06	7.31283e+06	6.63412e+06	0.0738487
Q9BXW7	HDHD5	Cat eye syndrome critical region protein 5	4	4	0.538258	0.0157014	+	22.1642	21.8839	21.8576	22.4947	22.6693	22.3565	3.94763e+06	4.99435e+06	5.14805e+06	4.69668e+06	0.113561	3.48731e+06	3.73237e+06	4.39024e+06	3.86997e+06	0.0985136	4.06725e+06	3.59895e+06	3.72409e+06	3.79677e+06	0.0521415	5.83362e+06	6.28831e+06	5.59738e+06	5.90644e+06	0.0485459	6.47747e+06	7.01406e+06	6.52163e+06	6.67105e+06	0.0364578	5.56587e+06	5.22588e+06	5.30417e+06	5.36531e+06	0.0270951
Q8NE62	CHDH	Choline dehydrogenase, mitochondrial	2	2	-0.417515	0.0157582		20.9842	21.0373	21.0801	20.7418	20.6883	20.419	2.1994e+06	2.28688e+06	1.73685e+06	2.07438e+06	0.116335	2.70459e+06	1.89311e+06	1.85875e+06	2.15215e+06	0.181627	2.24069e+06	1.74283e+06	2.66724e+06	2.21692e+06	0.1704	1.95006e+06	1.76668e+06	1.5437e+06	1.75348e+06	0.094759	1.43943e+06	1.25456e+06	2.37512e+06	1.6897e+06	0.290291	1.27018e+06	1.36289e+06	1.5729e+06	1.40199e+06	0.0903281
P32455	GBP1	Interferon-induced guanylate-binding protein 1	4	3	-1.62491	0.015786	+	20.2303	19.4691	19.9883	18.5091	17.6089	18.695	1.16723e+06	1.33868e+06	1.18426e+06	1.23006e+06	0.0626965	732743	694288	750203	725745	0.0321843	1.01362e+06	1.0274e+06	1.07928e+06	1.0401e+06	0.0271812	298693	351703	468851	373082	0.190554	166745	288946	143982	199891	0.31844	469406	482902	320794	424367	0.173067
Q14699	RFTN1	Raftlin	7	7	0.577714	0.0158017	+	24.7492	24.3239	24.4676	25.0359	25.2317	25.0062	2.89131e+07	2.86329e+07	2.70874e+07	2.82111e+07	0.0284569	2.02397e+07	2.13301e+07	2.15196e+07	2.10298e+07	0.0268209	2.44724e+07	2.31162e+07	2.20989e+07	2.32292e+07	0.0418553	3.50199e+07	3.28547e+07	3.52743e+07	3.4383e+07	0.0315752	3.78219e+07	3.98851e+07	4.04985e+07	3.94018e+07	0.029057	3.36389e+07	3.46491e+07	3.27503e+07	3.36794e+07	0.0230319
Q09666	AHNAK	Neuroblast differentiation-associated protein AHNAK	359	346	0.527713	0.0159159	+	33.3033	33.0299	32.9626	33.6735	33.7353	33.4702	1.05158e+10	1.06138e+10	1.06794e+10	1.0603e+10	0.00633907	8.39239e+09	9.0401e+09	8.87101e+09	8.76783e+09	0.0312856	8.23035e+09	8.31898e+09	8.55227e+09	8.3672e+09	0.016227	1.39806e+10	1.33664e+10	1.36627e+10	1.36699e+10	0.0183472	1.45267e+10	1.43302e+10	1.39738e+10	1.42769e+10	0.0160294	1.14375e+10	1.2124e+10	1.21674e+10	1.19096e+10	0.0280705
P62316	SNRPD2	Small nuclear ribonucleoprotein Sm D2	5	5	0.0890706	0.0159227		24.7745	24.8336	24.8093	24.8764	24.8858	24.9225	2.82791e+07	3.11115e+07	2.67735e+07	2.87213e+07	0.0626143	2.49717e+07	3.21324e+07	3.26184e+07	2.99075e+07	0.116885	2.72825e+07	3.11422e+07	2.96399e+07	2.93549e+07	0.0541153	2.98477e+07	2.93499e+07	3.33042e+07	3.08339e+07	0.0570322	2.81246e+07	2.97042e+07	3.52275e+07	3.10188e+07	0.0981694	3.02435e+07	3.22331e+07	3.30397e+07	3.18388e+07	0.0369083
Q14693	LPIN1	Phosphatidate phosphatase LPIN1	2	2	0.906748	0.0159587	+	20.6364	20.2419	21.0088	21.6231	21.5117	21.4726	1.17573e+06	1.57797e+06	2.14399e+06	1.63256e+06	0.243282	1.44736e+06	1.15529e+06	1.10574e+06	1.23613e+06	0.121933	1.57105e+06	2.23489e+06	2.52579e+06	2.11058e+06	0.189313	3.31563e+06	3.01523e+06	3.35126e+06	3.22738e+06	0.046698	2.29857e+06	3.29427e+06	3.38313e+06	2.99199e+06	0.164327	3.09367e+06	2.5672e+06	3.06815e+06	2.90967e+06	0.0833052
O43865	AHCYL1	Putative adenosylhomocysteinase 2	4	4	-0.237223	0.0160625		23.2627	23.3084	23.2241	23.0009	22.9507	23.1318	9.85532e+06	1.01218e+07	1.02148e+07	1.0064e+07	0.0151372	9.93122e+06	1.10962e+07	1.01353e+07	1.03876e+07	0.0488988	9.95331e+06	1.01217e+07	9.31936e+06	9.79813e+06	0.0352569	8.60888e+06	8.47736e+06	8.09562e+06	8.39395e+06	0.025933	7.07625e+06	9.05019e+06	8.19391e+06	8.10678e+06	0.0996954	8.80858e+06	8.35192e+06	1.04133e+07	9.19128e+06	0.0961782
P43307	SSR1	Translocon-associated protein subunit alpha	2	2	-0.423773	0.016092		24.6491	24.5878	24.4909	24.2665	24.2271	23.9629	2.55262e+07	2.56931e+07	2.77085e+07	2.63093e+07	0.0376958	2.56297e+07	2.63317e+07	2.36865e+07	2.5216e+07	0.0443705	2.15235e+07	2.55536e+07	2.36537e+07	2.35769e+07	0.0698216	1.83262e+07	2.07161e+07	2.15019e+07	2.01814e+07	0.0669168	2.13625e+07	1.60106e+07	2.15379e+07	1.9637e+07	0.130634	1.6702e+07	1.7284e+07	1.50666e+07	1.63509e+07	0.0574088
P22626	HNRNPA2B1	Heterogeneous nuclear ribonucleoproteins A2/B1	22	16	0.257843	0.016169		29.5555	29.6475	29.6285	29.9117	29.94	29.7533	7.9183e+08	7.95186e+08	7.78903e+08	7.8864e+08	0.0089014	8.46007e+08	8.37963e+08	8.39706e+08	8.41225e+08	0.00410767	8.2486e+08	8.4465e+08	8.20391e+08	8.29967e+08	0.0127011	1.0061e+09	1.03061e+09	1.00306e+09	1.01325e+09	0.0121721	1.03338e+09	1.01101e+09	1.03194e+09	1.02544e+09	0.00996967	8.74012e+08	9.11938e+08	9.2935e+08	9.051e+08	0.0255255
P18084	ITGB5	Integrin beta-5	18	17	-0.748021	0.0161958	+	26.3224	26.8612	26.6254	25.9092	25.6546	26.0011	8.46016e+07	8.35005e+07	8.36421e+07	8.39147e+07	0.00582879	1.26413e+08	1.20883e+08	1.18428e+08	1.21908e+08	0.0273933	9.8937e+07	1.03728e+08	1.07899e+08	1.03521e+08	0.0353695	6.19411e+07	6.59495e+07	6.11517e+07	6.30141e+07	0.0333335	4.96967e+07	5.26294e+07	5.61382e+07	5.28214e+07	0.0498512	6.54389e+07	6.9235e+07	6.68104e+07	6.71614e+07	0.0233691
Q12884	FAP	Seprase	18	17	-1.09815	0.016302	+	26.3149	26.753	26.7708	25.2536	25.3141	25.9766	8.3937e+07	8.08933e+07	8.56135e+07	8.34812e+07	0.0234037	1.09565e+08	1.15444e+08	1.14286e+08	1.13098e+08	0.0224846	1.12818e+08	1.10742e+08	1.19955e+08	1.14505e+08	0.034461	4.23542e+07	3.92387e+07	3.84154e+07	4.00027e+07	0.0424061	4.34987e+07	4.11699e+07	4.04818e+07	4.17168e+07	0.0309456	6.44825e+07	6.66965e+07	6.69103e+07	6.60298e+07	0.0166225
P78527	PRKDC	DNA-dependent protein kinase catalytic subunit	47	46	0.204726	0.0163541		26.4645	26.5075	26.4154	26.6458	26.604	26.7517	9.3949e+07	9.41368e+07	8.9593e+07	9.25596e+07	0.0226784	9.29081e+07	9.64733e+07	9.67061e+07	9.53625e+07	0.0182265	8.78947e+07	9.06951e+07	8.98183e+07	8.94694e+07	0.0130721	1.03541e+08	1.08467e+08	1.02897e+08	1.04968e+08	0.0237004	1.01727e+08	9.86544e+07	1.05678e+08	1.0202e+08	0.0281806	1.09344e+08	1.1648e+08	1.14202e+08	1.13342e+08	0.0262559
O15484	CAPN5	Calpain-5	4	4	0.813003	0.0163746	+	22.2506	21.5961	21.9352	22.8727	22.743	22.6051	4.94355e+06	5.41268e+06	4.62409e+06	4.99344e+06	0.0648585	3.63218e+06	3.39154e+06	2.49534e+06	3.17302e+06	0.154162	4.44083e+06	3.45408e+06	4.12505e+06	4.00665e+06	0.10269	7.78656e+06	7.76805e+06	7.48678e+06	7.68046e+06	0.0178584	7.26745e+06	6.77461e+06	7.01605e+06	7.01937e+06	0.0286656	6.61149e+06	5.74931e+06	6.79195e+06	6.38425e+06	0.071265
O94901	SUN1	SUN domain-containing protein 1	7	6	0.832641	0.0164457	+	23.7594	24.1795	23.654	24.7024	24.9271	24.4614	1.35357e+07	1.5043e+07	1.38781e+07	1.41523e+07	0.0455857	2.04024e+07	1.92476e+07	1.74355e+07	1.90285e+07	0.0641727	1.41773e+07	1.35074e+07	1.20537e+07	1.32461e+07	0.066921	2.46536e+07	2.91867e+07	2.81985e+07	2.73463e+07	0.0711715	3.03053e+07	3.11588e+07	3.41911e+07	3.18851e+07	0.0522947	2.47689e+07	2.30298e+07	2.14941e+07	2.30976e+07	0.057918
Q8TDX7	NEK7	Serine/threonine-protein kinase Nek7	3	3	-1.73126	0.0165334	+	23.5594	22.7382	22.0931	21.2634	20.9988	20.9347	1.31046e+07	1.2306e+07	1.16741e+07	1.23615e+07	0.0473487	6.68964e+06	6.97724e+06	7.32271e+06	6.99653e+06	0.0369912	4.55586e+06	4.16682e+06	4.69914e+06	4.47394e+06	0.0502696	2.50601e+06	2.5947e+06	2.45079e+06	2.51716e+06	0.0235494	2.18509e+06	2.0688e+06	2.03251e+06	2.09546e+06	0.0310586	1.95458e+06	2.06208e+06	1.99635e+06	2.00434e+06	0.0220765
Q9H2D6	TRIOBP	TRIO and F-actin-binding protein	8	7	0.840202	0.0165499	+	22.1734	21.6714	21.9777	23.0641	22.538	22.741	4.84809e+06	4.32825e+06	5.02232e+06	4.73289e+06	0.062294	3.07727e+06	3.23613e+06	3.69422e+06	3.33587e+06	0.0784069	4.09323e+06	4.05536e+06	4.22678e+06	4.12512e+06	0.0178247	9.24323e+06	8.39692e+06	8.67852e+06	8.77289e+06	0.0401111	5.93348e+06	6.42321e+06	5.91164e+06	6.08944e+06	0.0387849	6.7614e+06	6.99471e+06	7.2706e+06	7.0089e+06	0.0296942
Q9NP72	RAB18	Ras-related protein Rab-18	4	4	-0.314844	0.0166084		23.8198	23.6994	23.6092	23.3598	23.4948	23.3293	1.47269e+07	1.59015e+07	1.37921e+07	1.48068e+07	0.0582856	1.36287e+07	1.41796e+07	1.30579e+07	1.36221e+07	0.0336162	1.3501e+07	1.22573e+07	1.26292e+07	1.27959e+07	0.0407335	1.11736e+07	1.10246e+07	1.00952e+07	1.07645e+07	0.0443247	1.29356e+07	1.17947e+07	1.07306e+07	1.18203e+07	0.0761742	1.1969e+07	1.00823e+07	9.56732e+06	1.05396e+07	0.097957
O95394	PGM3	Phosphoacetylglucosamine mutase	5	5	-0.556346	0.0166291	+	23.0869	23.1863	22.7569	22.5423	22.4612	22.3575	8.66128e+06	8.71808e+06	9.34821e+06	8.90919e+06	0.0349412	9.3475e+06	9.01686e+06	1.02713e+07	9.54523e+06	0.0556162	7.08893e+06	6.68969e+06	7.48491e+06	7.08784e+06	0.0458034	5.23886e+06	6.31938e+06	6.76647e+06	6.10824e+06	0.104984	6.78521e+06	5.46388e+06	5.07405e+06	5.77438e+06	0.126813	4.98299e+06	5.55274e+06	5.58584e+06	5.37385e+06	0.0514927
P40189	IL6ST	Interleukin-6 receptor subunit beta	5	5	0.738208	0.0167117	+	22.9388	22.5915	22.5069	23.5983	23.4923	23.1612	8.36946e+06	7.40635e+06	8.34541e+06	8.0404e+06	0.055775	5.92334e+06	6.43839e+06	6.58736e+06	6.31636e+06	0.0450393	5.78378e+06	6.28053e+06	5.80544e+06	5.95658e+06	0.0384842	1.20403e+07	1.35225e+07	1.24677e+07	1.26768e+07	0.0491376	1.20041e+07	1.15153e+07	1.20303e+07	1.18499e+07	0.0199876	9.70985e+06	9.27664e+06	9.16647e+06	9.38432e+06	0.0249928
Q8WUM4	PDCD6IP	Programmed cell death 6-interacting protein	19	19	0.251902	0.0169205		26.1469	26.1681	25.9955	26.3712	26.4041	26.2909	7.71371e+07	7.14339e+07	7.41925e+07	7.42545e+07	0.0313614	7.56194e+07	7.46307e+07	7.59772e+07	7.54091e+07	0.00755153	6.61895e+07	6.60374e+07	6.84591e+07	6.68954e+07	0.0165555	8.88383e+07	8.46732e+07	8.69378e+07	8.68164e+07	0.0196111	8.41249e+07	9.22489e+07	9.01594e+07	8.88444e+07	0.0387696	8.03239e+07	8.3655e+07	8.2423e+07	8.2134e+07	0.016743
Q92747	ARPC1A	Actin-related protein 2/3 complex subunit 1A	3	2	-1.05102	0.0169274	+	19.3643	19.8893	19.122	18.6828	18.2193	18.3204	667950	849894	506839	674894	0.207644	1.12714e+06	733795	1.05243e+06	971120	0.175636	865701	301270	544717	570563	0.405129	360138	531724	370568	420810	0.186649	225532	232321	457682	305178	0.353472	491285	352139	138607	327343	0.443093
P35442	THBS2	Thrombospondin-2	8	8	-0.736524	0.0170055	+	24.5413	24.9372	24.39	23.7425	23.86	24.0564	2.39594e+07	2.44336e+07	2.48518e+07	2.44149e+07	0.0149321	3.17116e+07	3.00348e+07	3.46271e+07	3.21245e+07	0.0590644	2.03309e+07	2.28394e+07	2.27831e+07	2.19845e+07	0.0531949	1.28822e+07	1.47122e+07	1.45085e+07	1.40343e+07	0.0583501	1.45548e+07	1.53177e+07	1.58035e+07	1.52253e+07	0.0337554	1.7874e+07	1.80407e+07	1.64243e+07	1.74463e+07	0.0416082
Q9Y4W6	AFG3L2	AFG3-like protein 2	8	7	0.421329	0.0170076		22.1301	22.0493	22.3645	22.5777	22.6992	22.5309	5.16168e+06	4.04289e+06	4.55555e+06	4.5867e+06	0.0996956	4.06473e+06	5.15433e+06	3.79755e+06	4.33887e+06	0.135252	5.38728e+06	5.99901e+06	4.80949e+06	5.39859e+06	0.0899651	6.75584e+06	6.22239e+06	5.81498e+06	6.2644e+06	0.0614985	6.45618e+06	7.40146e+06	6.56142e+06	6.80635e+06	0.0621467	5.13003e+06	6.65319e+06	6.40158e+06	6.0616e+06	0.109984
Q13501	SQSTM1	Sequestosome-1	8	8	0.553378	0.0172866	+	24.7895	24.7024	24.3712	25.239	25.2317	25.0526	3.04379e+07	2.91007e+07	2.74845e+07	2.90077e+07	0.0416273	2.63866e+07	2.6898e+07	2.85506e+07	2.72784e+07	0.0338538	2.07316e+07	2.07968e+07	2.3611e+07	2.17132e+07	0.0618184	4.00083e+07	3.83088e+07	4.03531e+07	3.95567e+07	0.0225903	3.95469e+07	3.93071e+07	3.93415e+07	3.93985e+07	0.00268706	3.4776e+07	3.48248e+07	3.49063e+07	3.48357e+07	0.00154277
P11940	PABPC1	Polyadenylate-binding protein 1	15	9	-0.228076	0.017502		26.7987	26.6793	26.6049	26.4759	26.4861	26.4366	1.2049e+08	1.13785e+08	1.15949e+08	1.16741e+08	0.0239364	1.04638e+08	1.06091e+08	1.11657e+08	1.07462e+08	0.0281524	1.02978e+08	9.89761e+07	1.04236e+08	1.02063e+08	0.0219727	9.57954e+07	9.3583e+07	9.06318e+07	9.33367e+07	0.0226622	9.22292e+07	9.52908e+07	9.44641e+07	9.39947e+07	0.0137583	8.71209e+07	9.17435e+07	9.36196e+07	9.0828e+07	0.0300669
P50336	PPOX	Protoporphyrinogen oxidase	2	2	1.25393	0.0176846	+	17.7207	18.4736	17.9882	19.2372	19.7553	18.9516	220176	255922	173356	216485	0.156171	346186	298352	448042	364193	0.171401	287233	259595	232725	259851	0.0856403	614891	560917	678756	618188	0.0779116	1.02386e+06	872423	758484	884922	0.122834	535962	471975	511613	506517	0.0520615
Q15417	CNN3	Calponin-3	7	6	-0.942843	0.0177143	+	25.5704	26.0838	25.3526	24.8816	24.5168	24.7798	4.85117e+07	4.90145e+07	5.19533e+07	4.98265e+07	0.0304621	6.94602e+07	7.17286e+07	7.21783e+07	7.11224e+07	0.016726	4.08274e+07	4.56734e+07	4.20293e+07	4.28434e+07	0.0480921	2.92593e+07	3.19922e+07	3.14825e+07	3.09113e+07	0.0383865	2.51307e+07	2.45833e+07	2.23019e+07	2.40053e+07	0.0510309	2.83252e+07	2.9015e+07	2.90719e+07	2.88041e+07	0.0117828
P53618	COPB1	Coatomer subunit beta	17	16	-0.475023	0.0177229	+	25.9138	26.1385	25.9039	25.5877	25.3211	25.6224	6.58031e+07	6.21614e+07	6.16817e+07	6.32154e+07	0.0291105	7.06276e+07	7.86078e+07	7.23766e+07	7.38707e+07	0.0463635	6.38449e+07	6.0452e+07	6.40582e+07	6.2785e+07	0.0263119	5.05979e+07	4.85266e+07	5.21562e+07	5.04269e+07	0.0294826	4.14768e+07	4.0825e+07	4.34516e+07	4.19178e+07	0.0266403	4.89623e+07	5.40178e+07	5.19812e+07	5.16538e+07	0.0402069
P27694	RPA1	Replication protein A 70 kDa DNA-binding subunit	2	2	0.838891	0.0177996	+	20.5261	20.8651	20.3857	21.6929	21.1332	21.4676	1.70648e+06	1.44952e+06	1.37175e+06	1.50925e+06	0.0947704	2.39129e+06	1.25742e+06	2.09323e+06	1.91398e+06	0.250754	1.94123e+06	1.23073e+06	946284	1.37275e+06	0.3048	3.7273e+06	3.31312e+06	3.12385e+06	3.38809e+06	0.0743769	3.27174e+06	1.63599e+06	2.0036e+06	2.30378e+06	0.304158	3.04962e+06	3.17354e+06	2.46915e+06	2.89743e+06	0.105971
P16615	ATP2A2	Sarcoplasmic/endoplasmic reticulum calcium ATPase 2	22	22	-0.310636	0.017847		28.0623	28.2904	28.2132	27.9566	27.8724	27.8049	2.70044e+08	2.84439e+08	2.8636e+08	2.80281e+08	0.0259766	3.15315e+08	3.3524e+08	3.34292e+08	3.28282e+08	0.0279561	3.0411e+08	3.19619e+08	3.09811e+08	3.1118e+08	0.0205834	2.573e+08	2.54858e+08	2.69287e+08	2.60482e+08	0.0242084	2.39931e+08	2.45726e+08	2.51496e+08	2.45718e+08	0.0192144	2.31234e+08	2.36259e+08	2.35948e+08	2.34481e+08	0.00980501
Q14165	MLEC	Malectin	7	7	-0.326684	0.0178831		24.2828	24.4567	24.3548	24.1724	23.9596	23.9823	2.02575e+07	1.96295e+07	2.13438e+07	2.04103e+07	0.0346963	2.28555e+07	2.25786e+07	2.36406e+07	2.30249e+07	0.0195354	2.05523e+07	2.24207e+07	2.13916e+07	2.14548e+07	0.0356137	1.87258e+07	1.87589e+07	1.92359e+07	1.89069e+07	0.0123271	1.65744e+07	1.50619e+07	1.73039e+07	1.63134e+07	0.057236	1.46402e+07	1.79579e+07	1.71187e+07	1.65723e+07	0.0849886
Q9BQ24	ZFYVE21	Zinc finger FYVE domain-containing protein 21	3	2	0.544244	0.0179546	+	22.3805	22.0918	22.2877	22.8858	22.9316	22.5754	5.6976e+06	5.65928e+06	5.02424e+06	5.46037e+06	0.056551	4.1523e+06	4.04296e+06	5.21797e+06	4.47108e+06	0.118543	5.23684e+06	4.9733e+06	5.15429e+06	5.12148e+06	0.0214901	6.34715e+06	8.46144e+06	8.4351e+06	7.7479e+06	0.127846	7.39024e+06	8.32073e+06	8.28954e+06	8.00017e+06	0.0539328	5.06867e+06	7.46137e+06	6.23019e+06	6.25341e+06	0.156227
O95819	MAP4K4	Mitogen-activated protein kinase kinase kinase kinase 4	6	4	-0.66275	0.0179559	+	21.4876	21.7663	21.7097	21.1991	20.7039	21.0724	3.21674e+06	2.62341e+06	2.98141e+06	2.94052e+06	0.0829597	3.51669e+06	3.69876e+06	3.48589e+06	3.56711e+06	0.0263329	3.20372e+06	3.62018e+06	3.46573e+06	3.42988e+06	0.0501175	2.72169e+06	2.4541e+06	2.04668e+06	2.40749e+06	0.11528	1.91384e+06	1.7775e+06	1.43282e+06	1.70805e+06	0.118513	2.39555e+06	2.32529e+06	1.89452e+06	2.20512e+06	0.100445
Q86WA6	BPHL	Valacyclovir hydrolase	3	3	1.18189	0.0179755	+	20.343	19.5878	19.8891	21.0156	21.5309	20.8191	1.42509e+06	1.39654e+06	1.17077e+06	1.3308e+06	0.0854794	858759	553646	952827	788411	0.216116	690086	890629	1.33302e+06	971244	0.276547	1.92374e+06	2.31642e+06	2.12613e+06	2.12209e+06	0.0755546	3.03085e+06	3.06605e+06	2.99743e+06	3.03145e+06	0.00924204	1.88076e+06	2.03864e+06	1.64424e+06	1.85455e+06	0.0873949
P20908	COL5A1	Collagen alpha-1(V) chain	10	10	-1.69214	0.0180174	+	23.9254	25.2503	23.9713	22.5846	22.7477	22.7383	1.54964e+07	1.64953e+07	1.5802e+07	1.59312e+07	0.026231	4.26291e+07	3.75118e+07	3.95968e+07	3.99126e+07	0.0526408	1.61245e+07	1.66634e+07	1.65508e+07	1.64462e+07	0.0141104	5.82408e+06	7.19808e+06	5.84697e+06	6.28971e+06	0.102132	6.61989e+06	6.93434e+06	7.57415e+06	7.04279e+06	0.0563768	7.66069e+06	6.90596e+06	6.42356e+06	6.99673e+06	0.0727654
Q9HBL0	TNS1	Tensin-1	10	10	0.904048	0.0180176	+	22.7975	22.3805	22.6822	23.9134	23.391	23.2679	7.27242e+06	6.74475e+06	7.84028e+06	7.28581e+06	0.0613997	5.94427e+06	5.10438e+06	5.34251e+06	5.46372e+06	0.0646878	6.60708e+06	6.81743e+06	6.75718e+06	6.72723e+06	0.0131477	1.64125e+07	1.586e+07	1.50006e+07	1.57577e+07	0.0368675	1.16558e+07	1.07578e+07	1.06247e+07	1.10128e+07	0.0415853	1.05541e+07	9.30708e+06	1.04545e+07	1.01052e+07	0.0559946
P05166	PCCB	Propionyl-CoA carboxylase beta chain, mitochondrial	3	3	0.530935	0.0180596	+	21.7389	21.9134	22.0156	22.2679	22.6364	22.3565	3.10931e+06	3.49637e+06	3.90242e+06	3.5027e+06	0.0924475	3.98343e+06	3.52723e+06	4.34872e+06	3.95313e+06	0.0850106	4.27904e+06	4.36805e+06	4.06095e+06	4.23601e+06	0.0304562	4.60912e+06	5.31446e+06	5.23582e+06	5.05313e+06	0.0624563	5.95725e+06	6.9567e+06	6.63278e+06	6.51558e+06	0.0639019	4.3696e+06	6.13317e+06	5.60435e+06	5.36904e+06	0.137631
Q4LDE5	SVEP1	Sushi, von Willebrand factor type A, EGF and pentraxin domain-containing protein 1	7	7	0.776089	0.0180648	+	21.502	21.5592	21.632	22.4701	22.5983	21.953	2.85611e+06	3.09136e+06	2.95015e+06	2.96588e+06	0.0325979	3.09321e+06	2.7444e+06	3.44373e+06	3.09378e+06	0.0922828	2.75158e+06	3.51072e+06	3.48549e+06	3.24926e+06	0.108352	6.03599e+06	6.04514e+06	5.35242e+06	5.81118e+06	0.0558257	5.82544e+06	6.97928e+06	6.25471e+06	6.35315e+06	0.0749497	4.17621e+06	3.68545e+06	4.33315e+06	4.06493e+06	0.0678686
O75390	CS	Citrate synthase, mitochondrial	10	9	0.514154	0.018346	+	26.509	26.3118	26.48	26.9088	27.17	26.7645	9.6413e+07	9.4455e+07	9.56246e+07	9.54975e+07	0.00842322	8.55171e+07	7.9148e+07	8.52158e+07	8.32936e+07	0.0352242	9.43278e+07	9.20412e+07	9.44699e+07	9.3613e+07	0.0118885	1.19685e+08	1.3418e+08	1.25274e+08	1.2638e+08	0.0472283	1.44103e+08	1.49755e+08	1.58198e+08	1.50685e+08	0.0384355	1.12813e+08	1.12313e+08	1.16294e+08	1.13807e+08	0.015558
Q8IXM3	MRPL41	39S ribosomal protein L41, mitochondrial	2	2	0.371315	0.0185777		21.5309	21.5961	21.6584	22.0658	22.0459	21.7876	3.38727e+06	2.85903e+06	2.83533e+06	3.02721e+06	0.0841649	3.32271e+06	3.15121e+06	3.03657e+06	3.17016e+06	0.0370904	3.39257e+06	3.30567e+06	3.22716e+06	3.30847e+06	0.0204189	4.09469e+06	4.99806e+06	4.0723e+06	4.38835e+06	0.0982662	3.95074e+06	4.39929e+06	4.63357e+06	4.32787e+06	0.0654599	3.35041e+06	3.66711e+06	3.84881e+06	3.62211e+06	0.056858
Q9C005	DPY30	Protein dpy-30 homolog	2	2	0.374223	0.0186285		22.6779	22.68	22.5892	23.1612	23.0625	22.8461	6.83484e+06	6.92145e+06	6.37228e+06	6.70952e+06	0.0359302	7.38536e+06	7.0149e+06	5.75381e+06	6.71802e+06	0.103955	6.88979e+06	6.46319e+06	5.56375e+06	6.30558e+06	0.0876535	9.45327e+06	9.81963e+06	8.86899e+06	9.38063e+06	0.0417329	7.51136e+06	1.01339e+07	8.63366e+06	8.75964e+06	0.122647	7.10187e+06	7.50763e+06	8.00398e+06	7.53783e+06	0.0489403
P46087	NOP2	Putative ribosomal RNA methyltransferase NOP2	3	3	0.114386	0.0186419		22.4726	22.44	22.3884	22.5615	22.5685	22.5141	5.9104e+06	5.50947e+06	6.0349e+06	5.81825e+06	0.0385311	5.26154e+06	5.93997e+06	5.8799e+06	5.6938e+06	0.0538546	5.76779e+06	5.29534e+06	5.40482e+06	5.48932e+06	0.0367838	6.81908e+06	6.13909e+06	5.61842e+06	6.1922e+06	0.0793912	5.64047e+06	6.37826e+06	6.62808e+06	6.2156e+06	0.067455	5.55057e+06	6.39041e+06	6.03757e+06	5.99285e+06	0.057455
O00560	SDCBP	Syntenin-1	11	11	0.762358	0.0188343	+	26.4154	26.0422	26.4314	27.189	27.2353	26.7517	8.9443e+07	8.82606e+07	9.06734e+07	8.9459e+07	0.0110115	6.86059e+07	7.03795e+07	6.83892e+07	6.91249e+07	0.0128975	8.2745e+07	9.31269e+07	9.57315e+07	9.05344e+07	0.061962	1.51783e+08	1.51737e+08	1.55609e+08	1.53043e+08	0.0118577	1.58514e+08	1.61051e+08	1.53312e+08	1.57626e+08	0.0204381	1.09794e+08	1.15078e+08	1.15359e+08	1.1341e+08	0.0225712
P50454	SERPINH1	Serpin H1	28	28	-0.853839	0.0188849	+	30.7366	31.2572	30.53	30.0743	29.8783	30.0098	1.73295e+09	1.81018e+09	1.82434e+09	1.78916e+09	0.0224471	2.51591e+09	2.64321e+09	2.54068e+09	2.5666e+09	0.021471	1.55666e+09	1.54667e+09	1.54795e+09	1.55043e+09	0.00286382	1.14681e+09	1.12983e+09	1.11487e+09	1.1305e+09	0.011541	9.61884e+08	9.97824e+08	1.00085e+09	9.86851e+08	0.0179334	1.0714e+09	1.09475e+09	1.07697e+09	1.08104e+09	0.00921316
P00813	ADA	Adenosine deaminase	4	4	-1.69259	0.0188884	+	22.7336	23.7039	23.6384	22.1915	21.7032	21.1034	5.66555e+06	7.7223e+06	7.53481e+06	6.97422e+06	0.133138	1.31811e+07	1.40453e+07	1.37674e+07	1.36646e+07	0.0263601	1.22185e+07	1.30316e+07	1.39218e+07	1.30573e+07	0.0532757	3.38607e+06	5.10928e+06	5.87357e+06	4.78964e+06	0.217212	2.73094e+06	4.08452e+06	3.42789e+06	3.41445e+06	0.161865	2.11373e+06	2.42757e+06	2.21776e+06	2.25302e+06	0.0579355
P10301	RRAS	Ras-related protein R-Ras	11	8	0.594755	0.0189087	+	25.5463	25.1719	25.3975	25.9912	26.1469	25.7619	4.72129e+07	5.07846e+07	4.90176e+07	4.9005e+07	0.0297561	3.91566e+07	3.58685e+07	3.83589e+07	3.77946e+07	0.0370527	4.49701e+07	4.41274e+07	4.3636e+07	4.42445e+07	0.0124506	6.69127e+07	6.59373e+07	6.71804e+07	6.66768e+07	0.00801173	7.58222e+07	7.4598e+07	7.24225e+07	7.42809e+07	0.0189274	5.53006e+07	5.67325e+07	5.85764e+07	5.68698e+07	0.0235779
Q07954	LRP1	Prolow-density lipoprotein receptor-related protein 1	80	78	0.244312	0.0190002		29.4492	29.4294	29.4194	29.7357	29.7453	29.55	7.34607e+08	7.30616e+08	7.34574e+08	7.33265e+08	0.00255522	7.15445e+08	7.18486e+08	7.34226e+08	7.22719e+08	0.0113891	7.03804e+08	7.21619e+08	7.29641e+08	7.18355e+08	0.015031	8.92897e+08	8.93961e+08	8.96467e+08	8.94442e+08	0.00167342	8.85291e+08	8.94287e+08	9.20392e+08	8.9999e+08	0.0165409	7.6442e+08	7.98113e+08	7.94464e+08	7.85666e+08	0.0192152
Q14938	NFIX	Nuclear factor 1 X-type	9	8	0.445557	0.0192682		25.2058	25.275	25.4362	25.9406	25.6811	25.632	3.86512e+07	3.94555e+07	3.809e+07	3.87322e+07	0.0144681	4.06157e+07	3.90702e+07	4.22474e+07	4.06444e+07	0.0319161	4.4092e+07	4.70818e+07	4.50998e+07	4.54245e+07	0.0273414	6.19968e+07	6.72413e+07	6.38612e+07	6.43664e+07	0.0337234	5.29489e+07	5.38807e+07	5.45685e+07	5.37994e+07	0.0123364	5.36218e+07	5.20873e+07	5.0415e+07	5.20414e+07	0.0251641
P07195	LDHB	L-lactate dehydrogenase B chain	10	10	-0.279409	0.0192996		26.2899	26.1639	26.0937	25.8164	25.9182	25.9748	7.80847e+07	8.56225e+07	8.24268e+07	8.20447e+07	0.0376519	7.45651e+07	7.35844e+07	7.74052e+07	7.51849e+07	0.02155	7.0176e+07	6.92614e+07	7.54052e+07	7.16142e+07	0.037793	5.94995e+07	5.80849e+07	5.96818e+07	5.90887e+07	0.012079	6.49237e+07	6.30064e+07	6.23028e+07	6.3411e+07	0.017466	6.86893e+07	6.50387e+07	6.41061e+07	6.59447e+07	0.0299905
Q13405	MRPL49	39S ribosomal protein L49, mitochondrial	3	3	0.479923	0.0195545	+	20.0951	20.0292	20.1704	20.4576	20.8191	20.4576	1.16018e+06	1.00649e+06	1.18025e+06	1.11564e+06	0.0695708	1.31317e+06	964238	939569	1.07232e+06	0.159092	873534	1.43822e+06	1.23766e+06	1.18314e+06	0.197554	1.09568e+06	1.87114e+06	1.36283e+06	1.44321e+06	0.222864	1.95556e+06	1.98928e+06	1.61452e+06	1.85312e+06	0.0913466	1.73239e+06	1.13301e+06	1.44758e+06	1.43766e+06	0.170273
P51571	SSR4	Translocon-associated protein subunit delta	4	4	-0.378929	0.0195941		25.1438	25.0488	24.921	24.7139	24.7561	24.5068	3.63614e+07	3.73772e+07	3.74738e+07	3.70708e+07	0.0135734	3.40392e+07	3.38636e+07	3.62247e+07	3.47092e+07	0.0309432	2.9907e+07	3.27698e+07	3.26212e+07	3.1766e+07	0.0414261	2.63e+07	2.68558e+07	2.93975e+07	2.75178e+07	0.0490005	2.6697e+07	2.80517e+07	3.02575e+07	2.83354e+07	0.051785	2.1563e+07	2.49946e+07	2.49596e+07	2.38391e+07	0.0675135
O15260	SURF4	Surfeit locus protein 4	3	3	-0.349473	0.0196882		25.23	25.1788	25.0807	24.8976	24.8935	24.6501	4.05139e+07	3.79742e+07	3.9576e+07	3.93547e+07	0.0266444	3.9366e+07	3.70011e+07	3.75786e+07	3.79819e+07	0.0265046	3.61991e+07	3.40129e+07	3.62458e+07	3.5486e+07	0.0293573	2.63839e+07	3.2458e+07	3.49256e+07	3.12558e+07	0.114834	2.92272e+07	3.01158e+07	3.41555e+07	3.11662e+07	0.0688148	2.54943e+07	2.62773e+07	2.72108e+07	2.63275e+07	0.0266505
P30041	PRDX6	Peroxiredoxin-6	13	13	-0.480719	0.0197657	+	27.3974	27.4228	27.0559	26.7695	26.9078	26.7565	1.72797e+08	1.78204e+08	1.79329e+08	1.76777e+08	0.0161305	1.91476e+08	1.80472e+08	1.67819e+08	1.79922e+08	0.0537217	1.38306e+08	1.38569e+08	1.41672e+08	1.39516e+08	0.0109546	1.05886e+08	1.2246e+08	1.14857e+08	1.14401e+08	0.0592104	1.21443e+08	1.23742e+08	1.32552e+08	1.25913e+08	0.0380245	1.0979e+08	1.1781e+08	1.12513e+08	1.13371e+08	0.0293706
Q8WUH6	TMEM263	Transmembrane protein 263	2	2	-0.78283	0.0197666	+	23.7233	23.8524	23.3387	23.1333	22.6913	22.7412	1.38455e+07	1.39514e+07	1.37495e+07	1.38488e+07	0.00595273	1.37258e+07	1.60012e+07	1.57097e+07	1.51456e+07	0.0667484	9.91205e+06	1.0542e+07	1.13701e+07	1.06081e+07	0.0562863	9.19603e+06	8.90124e+06	9.50421e+06	9.20049e+06	0.0267574	5.98037e+06	7.70815e+06	6.62998e+06	6.77283e+06	0.105208	6.37996e+06	7.6132e+06	7.04012e+06	7.01109e+06	0.0718696
Q99439	CNN2	Calponin-2	7	7	-0.706927	0.0198236	+	27.2888	27.6386	27.1671	26.6951	26.4266	26.852	1.61099e+08	1.65293e+08	1.65508e+08	1.63967e+08	0.0123794	1.99568e+08	2.23205e+08	2.04079e+08	2.08951e+08	0.0490378	1.46251e+08	1.49713e+08	1.56125e+08	1.50696e+08	0.0271448	1.05689e+08	1.12796e+08	1.07461e+08	1.08649e+08	0.0277997	8.7852e+07	8.94868e+07	9.32516e+07	9.01968e+07	0.0250652	1.17347e+08	1.20156e+08	1.259e+08	1.21134e+08	0.0293847
P17252	PRKCA	Protein kinase C alpha type	8	8	-0.756186	0.0198703	+	23.3027	23.0764	22.6641	22.1273	22.2606	22.3868	1.09142e+07	1.10675e+07	9.05983e+06	1.03472e+07	0.0881813	9.83421e+06	9.1085e+06	7.5923e+06	8.845e+06	0.105599	6.76871e+06	6.5121e+06	6.65753e+06	6.64611e+06	0.0158095	4.38469e+06	5.33398e+06	4.02481e+06	4.58116e+06	0.120543	5.84253e+06	4.98512e+06	4.24619e+06	5.02461e+06	0.129821	5.87624e+06	5.50625e+06	5.06984e+06	5.48411e+06	0.0600981
P15880	RPS2	40S ribosomal protein S2	11	11	-0.308885	0.0200977		27.6743	27.67	27.5077	27.3466	27.391	27.1877	2.11795e+08	2.06204e+08	2.24551e+08	2.14183e+08	0.035849	2.03128e+08	2.1217e+08	2.25341e+08	2.13546e+08	0.0427082	1.9097e+08	1.9191e+08	1.89602e+08	1.90827e+08	0.00496598	1.73689e+08	1.6713e+08	1.71183e+08	1.70667e+08	0.0158348	1.70139e+08	1.76742e+08	1.81123e+08	1.76001e+08	0.0256512	1.48478e+08	1.55702e+08	1.54407e+08	1.52862e+08	0.0205745
O43143	DHX15	Putative pre-mRNA-splicing factor ATP-dependent RNA helicase DHX15	5	4	0.22369	0.0203126		22.1174	22.3017	22.2849	22.4701	22.4349	22.4701	3.86555e+06	5.08064e+06	4.68982e+06	4.54533e+06	0.111427	5.74351e+06	4.84294e+06	4.92213e+06	5.16953e+06	0.0787599	5.45447e+06	5.51228e+06	4.35579e+06	5.10751e+06	0.104174	4.90937e+06	6.38704e+06	6.14344e+06	5.81329e+06	0.111272	5.43504e+06	5.95991e+06	5.62876e+06	5.67457e+06	0.0381898	5.61311e+06	5.77102e+06	6.0461e+06	5.81008e+06	0.0307938
Q7Z434	MAVS	Mitochondrial antiviral-signaling protein	3	3	0.670476	0.0204114	+	22.2564	22.1704	21.9742	23.1222	22.6671	22.6231	4.70996e+06	5.55619e+06	4.76812e+06	5.01142e+06	0.0770115	4.38901e+06	5.13858e+06	4.63041e+06	4.71933e+06	0.066197	3.84784e+06	4.44957e+06	4.06608e+06	4.12116e+06	0.0603529	8.1815e+06	8.77452e+06	1.04387e+07	9.13158e+06	0.104633	5.29303e+06	7.16292e+06	7.52338e+06	6.65978e+06	0.146788	5.98278e+06	6.50508e+06	6.88794e+06	6.4586e+06	0.0574411
Q9BRR6	ADPGK	ADP-dependent glucokinase	4	4	-0.401563	0.0204163		23.58	23.6568	23.486	23.3401	23.17	23.008	1.25787e+07	1.26405e+07	1.24004e+07	1.25399e+07	0.00811746	1.357e+07	1.39938e+07	1.21121e+07	1.32253e+07	0.060939	1.09953e+07	1.19774e+07	1.22745e+07	1.17491e+07	0.0465266	1.07072e+07	1.07577e+07	1.0392e+07	1.0619e+07	0.0152371	8.99774e+06	8.83225e+06	1.04833e+07	9.43777e+06	0.0786618	8.49516e+06	8.65295e+06	8.15793e+06	8.43535e+06	0.0244764
Q9Y3F4	STRAP	Serine-threonine kinase receptor-associated protein	5	5	-0.38417	0.0204343		24.0059	23.7441	23.8255	23.5405	23.3377	23.5447	1.65183e+07	1.70515e+07	1.69678e+07	1.68459e+07	0.0138988	1.31897e+07	1.35345e+07	1.54253e+07	1.40498e+07	0.0699467	1.42219e+07	1.41442e+07	1.623e+07	1.48654e+07	0.0649454	1.32934e+07	1.12037e+07	1.21051e+07	1.22007e+07	0.0701429	1.0973e+07	1.02565e+07	1.05736e+07	1.0601e+07	0.0276537	1.19966e+07	1.24038e+07	1.231e+07	1.22368e+07	0.0142288
Q8WUJ3	CEMIP	Cell migration-inducing and hyaluronan-binding protein	23	23	-2.24245	0.0204544	+	24.6282	26.2074	26.092	23.8823	22.7847	23.5332	2.55692e+07	2.70614e+07	2.51629e+07	2.59312e+07	0.0314777	7.31264e+07	8.08536e+07	7.84756e+07	7.74852e+07	0.041704	7.28001e+07	7.17607e+07	7.00218e+07	7.15275e+07	0.0160242	1.6192e+07	1.4602e+07	1.55953e+07	1.54631e+07	0.0424126	6.45615e+06	8.61664e+06	6.60451e+06	7.22577e+06	0.136368	1.24978e+07	1.20049e+07	1.19154e+07	1.21394e+07	0.021096
P16219	ACADS	Short-chain specific acyl-CoA dehydrogenase, mitochondrial	6	6	0.668251	0.0204697	+	23.2679	23.6209	23.654	24.0359	24.4425	24.0691	1.00464e+07	1.03723e+07	9.80469e+06	1.00745e+07	0.0230868	1.38858e+07	1.20126e+07	1.27793e+07	1.28926e+07	0.0596412	1.3469e+07	1.25733e+07	1.3589e+07	1.32104e+07	0.0343025	1.65379e+07	1.79926e+07	1.69782e+07	1.71695e+07	0.035476	1.87187e+07	2.59227e+07	2.38847e+07	2.2842e+07	0.132739	2.05615e+07	1.71413e+07	1.50348e+07	1.75792e+07	0.129551
Q9HAV7	GRPEL1	GrpE protein homolog 1, mitochondrial	3	3	0.238101	0.0205088		22.6628	22.7915	22.7715	22.9006	23.0723	22.9672	7.07636e+06	6.77609e+06	6.08002e+06	6.64416e+06	0.0628092	6.63564e+06	7.25571e+06	7.8925e+06	7.26128e+06	0.0706656	7.01734e+06	7.41601e+06	7.04729e+06	7.16021e+06	0.0253189	8.31485e+06	7.19162e+06	7.97227e+06	7.82625e+06	0.0600591	8.49024e+06	9.40364e+06	8.566e+06	8.81996e+06	0.0469258	8.01331e+06	8.03811e+06	8.54613e+06	8.19918e+06	0.0299466
Q9H299	SH3BGRL3	SH3 domain-binding glutamic acid-rich-like protein 3	4	4	0.436371	0.0205221		26.8504	26.673	26.7389	27.1115	27.3992	27.0609	1.18337e+08	1.23409e+08	1.20117e+08	1.20621e+08	0.0174181	1.04444e+08	1.13704e+08	1.03647e+08	1.07265e+08	0.0425538	1.12835e+08	1.15698e+08	1.07667e+08	1.12067e+08	0.0296583	1.52228e+08	1.44226e+08	1.37822e+08	1.44759e+08	0.040711	1.89555e+08	1.73026e+08	1.68087e+08	1.76889e+08	0.0518968	1.44566e+08	1.409e+08	1.34911e+08	1.40126e+08	0.0284011
P09543	CNP	2',3'-cyclic-nucleotide 3'-phosphodiesterase	11	11	0.302986	0.0206941		26.8142	26.9203	26.8264	27.2445	27.217	27.0084	1.1198e+08	1.20218e+08	1.21266e+08	1.17821e+08	0.0352423	1.3534e+08	1.18727e+08	1.26878e+08	1.26982e+08	0.0534146	1.19766e+08	1.21096e+08	1.15018e+08	1.18627e+08	0.0219931	1.37279e+08	1.69982e+08	1.70819e+08	1.5936e+08	0.0979995	1.43474e+08	1.54483e+08	1.70125e+08	1.56027e+08	0.0700824	1.39205e+08	1.29251e+08	1.36791e+08	1.35082e+08	0.0313841
P84157	MXRA7	Matrix-remodeling-associated protein 7	4	4	-0.336417	0.020767		25.3584	25.223	25.2187	25.0089	25.0084	24.7735	4.45314e+07	4.2669e+07	4.1848e+07	4.30161e+07	0.0260987	3.75062e+07	4.21484e+07	3.78326e+07	3.91624e+07	0.0540213	3.93209e+07	3.72923e+07	4.05256e+07	3.90463e+07	0.0341701	3.59187e+07	3.2079e+07	3.32901e+07	3.37626e+07	0.0474715	3.34693e+07	3.47528e+07	3.30284e+07	3.37502e+07	0.0216729	2.76005e+07	2.77547e+07	3.06798e+07	2.86783e+07	0.049398
P35244	RPA3	Replication protein A 14 kDa subunit	3	3	0.442076	0.0208314		22.2477	22.2905	22.0951	22.823	22.4651	22.6714	4.82363e+06	4.73286e+06	5.38221e+06	4.97956e+06	0.0576584	4.947e+06	5.28459e+06	5.15872e+06	5.1301e+06	0.0271529	4.01274e+06	5.05447e+06	4.36347e+06	4.47689e+06	0.0966695	6.36591e+06	7.48862e+06	8.40913e+06	7.42122e+06	0.112583	5.11334e+06	5.92592e+06	6.31879e+06	5.78601e+06	0.0867555	6.67295e+06	5.88923e+06	7.47155e+06	6.67791e+06	0.0967349
Q6P1N0	CC2D1A	Coiled-coil and C2 domain-containing protein 1A	2	2	0.666746	0.0208323	+	17.6168	17.4004	17.4656	18.2466	18.4004	17.8361	215073	300393	88876.6	201447	0.431314	109541	126743	284186	173490	0.452984	185321	260870	95657.6	180616	0.373885	401682	414266	117398	311115	0.440593	173218	521777	342668	345888	0.411453	175006	260826	267463	234432	0.179616
P18085	ARF4	ADP-ribosylation factor 4	8	6	-0.527793	0.0208955	+	25.5345	25.6956	25.357	25.1104	25.1	24.7933	4.69074e+07	4.90337e+07	4.9865e+07	4.86021e+07	0.0256244	5.96489e+07	4.96253e+07	5.37603e+07	5.43448e+07	0.0756821	4.17559e+07	4.1609e+07	4.55603e+07	4.29751e+07	0.0425605	3.20343e+07	3.78748e+07	3.87627e+07	3.62239e+07	0.0823934	3.39794e+07	3.73186e+07	3.65925e+07	3.59635e+07	0.0398722	2.91516e+07	2.94341e+07	2.86409e+07	2.90755e+07	0.0112908
P62495	ETF1	Eukaryotic peptide chain release factor subunit 1	6	5	-0.249523	0.0212397		23.9316	23.9632	23.9462	23.822	23.5913	23.6791	1.55261e+07	1.59549e+07	1.65198e+07	1.60003e+07	0.0254328	1.5952e+07	1.59186e+07	1.71928e+07	1.63545e+07	0.0362574	1.44313e+07	1.65847e+07	1.74733e+07	1.61631e+07	0.0790171	1.34761e+07	1.58869e+07	1.51267e+07	1.48299e+07	0.0678605	1.17388e+07	1.22749e+07	1.39019e+07	1.26385e+07	0.072772	1.34528e+07	1.37266e+07	1.3114e+07	1.34311e+07	0.0186572
Q9Y263	PLAA	Phospholipase A-2-activating protein	2	2	-0.333242	0.0213938		20.3452	20.2339	20.0967	19.9528	19.9421	19.7812	1.08274e+06	1.37784e+06	1.53547e+06	1.33202e+06	0.140873	1.36212e+06	1.33989e+06	997510	1.23317e+06	0.135331	950362	1.37725e+06	1.03611e+06	1.12124e+06	0.164441	766835	1.12787e+06	1.14972e+06	1.01481e+06	0.173009	959304	988910	1.07374e+06	1.00732e+06	0.0481452	849600	1.18277e+06	670686	901019	0.235506
O00571	DDX3X	ATP-dependent RNA helicase DDX3X	20	19	-0.311057	0.0215709		26.8663	27.0516	26.8994	26.7521	26.5847	26.5473	1.20154e+08	1.2226e+08	1.24589e+08	1.22335e+08	0.0148062	1.35155e+08	1.37074e+08	1.45083e+08	1.39104e+08	0.0309102	1.2712e+08	1.21729e+08	1.26685e+08	1.25178e+08	0.0195348	1.11778e+08	1.15195e+08	1.1211e+08	1.13028e+08	0.0136097	9.87466e+07	1.05095e+08	9.80926e+07	1.00645e+08	0.031378	9.79137e+07	9.7031e+07	9.92605e+07	9.80684e+07	0.00934798
Q9Y2J2	EPB41L3	Band 4.1-like protein 3	18	17	0.434857	0.0216215		26.0338	25.632	25.7821	26.2856	26.217	26.2499	6.88423e+07	6.89677e+07	6.83774e+07	6.87292e+07	0.00369517	5.13597e+07	5.23068e+07	5.22001e+07	5.19555e+07	0.00815255	5.88469e+07	5.80652e+07	5.63246e+07	5.77455e+07	0.0182562	8.64667e+07	7.9552e+07	7.94486e+07	8.18224e+07	0.0401385	8.06872e+07	7.78841e+07	7.53684e+07	7.79799e+07	0.0278588	7.79964e+07	8.13384e+07	8.01928e+07	7.98425e+07	0.0173673
O14933	UBE2L6	Ubiquitin/ISG15-conjugating enzyme E2 L6	2	2	-0.335565	0.0216472		20.7937	20.5913	20.8267	20.4871	20.4187	20.2993	1.6398e+06	2.03611e+06	1.77741e+06	1.81777e+06	0.09038	1.4799e+06	1.43965e+06	1.81994e+06	1.57983e+06	0.107969	1.83056e+06	1.8447e+06	1.90401e+06	1.85976e+06	0.0171101	1.48035e+06	1.27291e+06	1.65573e+06	1.46966e+06	0.106465	1.30009e+06	1.43514e+06	1.46971e+06	1.40165e+06	0.0522131	812572	1.6325e+06	1.42598e+06	1.29035e+06	0.26985
P19367	HK1	Hexokinase-1	22	22	0.664101	0.021689	+	26.6595	26.275	26.4441	27.1507	27.3578	26.8623	1.06098e+08	1.05016e+08	1.07137e+08	1.06084e+08	0.00816504	7.99942e+07	8.30791e+07	8.05627e+07	8.1212e+07	0.0165056	8.79009e+07	9.40311e+07	9.20346e+07	9.13222e+07	0.0279545	1.42206e+08	1.51107e+08	1.5408e+08	1.49131e+08	0.0338292	1.71259e+08	1.75241e+08	1.68744e+08	1.71748e+08	0.0155742	1.21063e+08	1.24028e+08	1.2146e+08	1.22184e+08	0.0107552
Q9ULC4	MCTS1	Malignant T-cell-amplified sequence 1	5	5	-0.415473	0.0217409		24.6609	24.9797	24.7609	24.5015	24.2812	24.3724	2.6038e+07	2.67835e+07	2.67545e+07	2.65253e+07	0.0129985	3.42448e+07	3.17205e+07	3.32912e+07	3.30855e+07	0.0314569	2.93138e+07	2.78018e+07	2.81748e+07	2.84301e+07	0.0226217	2.33618e+07	2.47428e+07	2.31473e+07	2.37506e+07	0.0297696	2.04484e+07	2.14966e+07	1.9218e+07	2.03877e+07	0.0456767	2.1259e+07	2.09866e+07	2.29093e+07	2.17183e+07	0.0391128
Q9BSD7	NTPCR	Cancer-related nucleoside-triphosphatase	5	5	0.877942	0.0217648	+	22.6409	23.391	22.7203	23.848	23.7286	23.8093	6.74252e+06	6.3784e+06	6.48827e+06	6.53639e+06	0.0233303	1.12946e+07	1.05685e+07	1.11332e+07	1.09988e+07	0.0283056	7.03786e+06	6.82704e+06	6.85595e+06	6.90695e+06	0.0135109	1.31437e+07	1.6024e+07	1.62183e+07	1.51287e+07	0.0929246	1.28909e+07	1.51007e+07	1.37791e+07	1.39235e+07	0.0652062	1.42467e+07	1.43908e+07	1.55453e+07	1.47276e+07	0.0394604
P24666	ACP1	Low molecular weight phosphotyrosine protein phosphatase	2	2	-0.531734	0.0217741	+	21.5595	21.8499	21.8618	21.0124	21.3511	21.3125	2.91298e+06	2.94875e+06	3.41063e+06	3.09078e+06	0.0733262	3.65925e+06	3.73897e+06	3.94098e+06	3.77973e+06	0.0313706	3.15614e+06	4.22937e+06	4.04781e+06	3.81111e+06	0.123068	1.98484e+06	2.23642e+06	2.12442e+06	2.11523e+06	0.0486532	2.85286e+06	2.3578e+06	2.81402e+06	2.67489e+06	0.0840342	2.51463e+06	2.68974e+06	2.60892e+06	2.60443e+06	0.0274759
P26583	HMGB2	High mobility group protein B2	6	3	0.370515	0.0218028		24.0772	24.3444	24.1332	24.4488	24.6595	24.558	1.93362e+07	1.71702e+07	1.6604e+07	1.77035e+07	0.0665081	2.08302e+07	2.23188e+07	2.07222e+07	2.12904e+07	0.0342174	1.83953e+07	1.88601e+07	1.79828e+07	1.84127e+07	0.0194633	2.35645e+07	2.35178e+07	2.15701e+07	2.28841e+07	0.0406102	2.67064e+07	2.80168e+07	2.46832e+07	2.64688e+07	0.0518067	2.466e+07	2.48675e+07	2.45985e+07	2.47087e+07	0.00465778
P00367	GLUD1	Glutamate dehydrogenase 1, mitochondrial	23	23	0.604238	0.0219727	+	28.6005	28.4473	28.7739	29.1361	29.4765	29.0217	4.12427e+08	4.02819e+08	4.05079e+08	4.06775e+08	0.0100839	3.442e+08	3.86975e+08	3.67971e+08	3.66382e+08	0.0477605	4.48447e+08	4.59617e+08	4.69282e+08	4.59115e+08	0.0185424	6.0509e+08	5.67018e+08	5.96555e+08	5.89554e+08	0.0276683	7.40659e+08	7.48729e+08	7.52386e+08	7.47258e+08	0.00655666	5.34134e+08	5.58507e+08	5.43003e+08	5.45215e+08	0.0184737
P09493	TPM1	Tropomyosin alpha-1 chain	12	3	-0.902442	0.0220577	+	23.6641	23.7414	23.0574	22.5238	22.4116	22.8203	1.32412e+07	1.35971e+07	1.30385e+07	1.32923e+07	0.0173682	1.48916e+07	1.47989e+07	1.2382e+07	1.40242e+07	0.0828414	8.91429e+06	8.60283e+06	8.671e+06	8.72938e+06	0.0153145	6.71463e+06	5.95012e+06	5.42576e+06	6.03017e+06	0.0877612	6.86366e+06	5.28791e+06	4.58563e+06	5.57907e+06	0.17073	7.55914e+06	7.65025e+06	7.00859e+06	7.40599e+06	0.0382743
Q14192	FHL2	Four and a half LIM domains protein 2	7	7	-0.764549	0.0220725	+	25.9944	25.8439	25.4928	25.2606	24.7459	25.0309	6.87044e+07	6.72534e+07	6.45861e+07	6.68479e+07	0.0255136	6.43056e+07	5.85124e+07	5.78631e+07	6.0227e+07	0.0480869	4.81385e+07	4.53254e+07	4.81853e+07	4.72164e+07	0.0283222	4.20775e+07	4.18344e+07	3.66833e+07	4.01984e+07	0.0618811	3.06764e+07	2.71973e+07	2.65317e+07	2.81351e+07	0.0645946	3.7862e+07	3.47752e+07	3.0207e+07	3.42814e+07	0.0917286
Q96CG8	CTHRC1	Collagen triple helix repeat-containing protein 1	3	3	-2.14258	0.0221676	+	22.0347	22.6809	20.7923	19.5091	19.4716	20.0994	3.21649e+06	4.46776e+06	5.20536e+06	4.29654e+06	0.191068	6.59585e+06	6.41444e+06	7.16206e+06	6.72412e+06	0.0473529	1.72121e+06	1.77461e+06	1.95187e+06	1.8159e+06	0.0542919	500662	876317	861537	746172	0.232797	573823	532039	1.07515e+06	727003	0.339428	1.5042e+06	1.02296e+06	842975	1.12338e+06	0.248469
Q92791	P3H4	Synaptonemal complex protein SC65	3	2	-0.837344	0.0223635	+	23.1128	23.5341	22.7798	22.3676	22.3948	22.1522	8.40906e+06	9.26803e+06	9.53463e+06	9.07057e+06	0.0529468	1.27392e+07	1.10107e+07	1.269e+07	1.21466e+07	0.0661493	6.53844e+06	8.03655e+06	7.02825e+06	7.20108e+06	0.0866112	5.16426e+06	4.94544e+06	6.12467e+06	5.41145e+06	0.0946455	4.50944e+06	5.30043e+06	6.73333e+06	5.5144e+06	0.166912	4.48769e+06	4.5391e+06	4.95618e+06	4.66099e+06	0.0450081
Q06481	APLP2	Amyloid-like protein 2	9	9	0.591038	0.0226745	+	23.3645	22.8461	23.2821	23.7286	23.7182	23.8191	1.06451e+07	1.09141e+07	1.09234e+07	1.08275e+07	0.0119183	6.86704e+06	8.29344e+06	7.47361e+06	7.5447e+06	0.0774709	9.59445e+06	1.069e+07	1.02142e+07	1.01662e+07	0.0441223	1.30016e+07	1.44394e+07	1.41354e+07	1.38588e+07	0.0446432	1.28797e+07	1.41717e+07	1.43238e+07	1.37917e+07	0.0469768	1.46965e+07	1.38041e+07	1.58418e+07	1.47808e+07	0.0564255
P11021	HSPA5	78 kDa glucose-regulated protein	32	30	-0.373035	0.0227291		30.8137	31.1004	30.7887	30.5816	30.505	30.4971	1.891e+09	1.90306e+09	1.86787e+09	1.88731e+09	0.00773701	2.20994e+09	2.3343e+09	2.36272e+09	2.30232e+09	0.0288174	1.8705e+09	1.80603e+09	1.88804e+09	1.85486e+09	0.0190099	1.63139e+09	1.56187e+09	1.6272e+09	1.60682e+09	0.0198105	1.51957e+09	1.50849e+09	1.54321e+09	1.52376e+09	0.00950419	1.4721e+09	1.53187e+09	1.54248e+09	1.51549e+09	0.0204416
P09661	SNRPA1	U2 small nuclear ribonucleoprotein A'	5	5	0.295741	0.0228023		23.8288	24.0772	23.9134	24.2317	24.3031	24.1719	1.416e+07	1.55438e+07	1.49368e+07	1.48802e+07	0.0380621	1.80559e+07	1.72463e+07	1.76485e+07	1.76502e+07	0.0187249	1.38352e+07	1.67764e+07	1.6639e+07	1.57502e+07	0.0860501	1.90971e+07	1.99115e+07	2.0077e+07	1.96952e+07	0.0217456	1.8656e+07	2.26425e+07	2.0838e+07	2.07122e+07	0.0786927	1.97382e+07	1.70538e+07	1.98102e+07	1.88674e+07	0.0679872
Q9Y678	COPG1	Coatomer subunit gamma-1	24	21	-0.548383	0.0228149	+	25.9114	26.2926	25.8696	25.493	25.3445	25.5909	6.33919e+07	6.15615e+07	6.43832e+07	6.31122e+07	0.0185193	8.27692e+07	8.0533e+07	8.32903e+07	8.21975e+07	0.0145506	6.08118e+07	5.95319e+07	6.35792e+07	6.13076e+07	0.0275508	4.51031e+07	4.71092e+07	4.94531e+07	4.72218e+07	0.0376451	4.10489e+07	4.27724e+07	4.39962e+07	4.26058e+07	0.0283761	5.17271e+07	4.8354e+07	5.1539e+07	5.054e+07	0.0306225
Q99567	NUP88	Nuclear pore complex protein Nup88	2	2	0.347467	0.022973		21.7995	22.1301	21.9495	22.3239	22.3211	22.2764	3.18642e+06	3.69339e+06	4.07404e+06	3.65128e+06	0.0995791	4.64368e+06	4.2678e+06	4.84556e+06	4.58568e+06	0.0522078	3.40607e+06	5.06508e+06	3.67007e+06	4.04707e+06	0.179849	4.03605e+06	6.04406e+06	5.65973e+06	5.24661e+06	0.165871	3.90384e+06	6.32945e+06	5.4868e+06	5.24003e+06	0.191889	4.78864e+06	5.43755e+06	5.02793e+06	5.08471e+06	0.0526951
P51151	RAB9A	Ras-related protein Rab-9A	2	2	-0.35498	0.0230162		22.1626	21.9639	22.177	21.8678	21.7495	21.6213	4.47696e+06	4.86963e+06	4.73726e+06	4.69462e+06	0.0347461	3.49278e+06	4.00963e+06	4.76981e+06	4.09074e+06	0.128214	4.3349e+06	5.09441e+06	4.79569e+06	4.74167e+06	0.065887	2.76188e+06	3.83708e+06	4.88203e+06	3.827e+06	0.226176	3.43108e+06	3.22761e+06	3.91838e+06	3.52569e+06	0.0822062	2.83604e+06	3.4587e+06	3.38295e+06	3.2259e+06	0.0859908
Q13404	UBE2V1	Ubiquitin-conjugating enzyme E2 variant 1	3	3	-0.350205	0.0230387		22.7933	22.9278	22.6085	22.3649	22.4487	22.4655	8.08666e+06	6.21223e+06	7.50824e+06	7.26904e+06	0.107813	7.69874e+06	8.17343e+06	8.06514e+06	7.9791e+06	0.0254563	5.88242e+06	6.29797e+06	7.00396e+06	6.39478e+06	0.0723962	5.54164e+06	5.31143e+06	5.35079e+06	5.40129e+06	0.0186136	5.34438e+06	5.27175e+06	6.5566e+06	5.72425e+06	0.10295	5.59751e+06	5.62876e+06	6.14762e+06	5.79129e+06	0.0435622
P28066	PSMA5	Proteasome subunit alpha type-5	7	5	-0.485166	0.0230604		25.0321	24.7087	24.6988	24.1747	24.368	24.4414	3.45811e+07	3.41331e+07	3.42132e+07	3.43091e+07	0.00568585	2.78691e+07	2.69341e+07	2.74564e+07	2.74199e+07	0.0139534	2.76356e+07	2.7604e+07	2.64571e+07	2.72322e+07	0.0201331	1.95701e+07	1.94193e+07	1.78214e+07	1.89369e+07	0.0417815	2.38874e+07	2.11183e+07	1.99511e+07	2.16523e+07	0.0762399	2.34693e+07	2.25016e+07	2.23758e+07	2.27822e+07	0.0214434
Q5XKP0	MICOS13	Protein QIL1	3	3	0.360028	0.0231122		23.7286	23.8764	23.8288	24.1795	24.3239	24.0105	1.21801e+07	1.44537e+07	1.50298e+07	1.38878e+07	0.0885853	1.60018e+07	1.45157e+07	1.55968e+07	1.53714e+07	0.0408066	1.41194e+07	1.53039e+07	1.53095e+07	1.49109e+07	0.0375379	1.56865e+07	2.07943e+07	2.06116e+07	1.90308e+07	0.124322	2.0399e+07	2.08611e+07	2.17236e+07	2.09945e+07	0.0261454	1.79193e+07	1.55477e+07	1.73469e+07	1.6938e+07	0.0596552
Q9UK45	LSM7	U6 snRNA-associated Sm-like protein LSm7	2	2	0.398326	0.0232604		23.0983	23.2821	22.9441	23.4298	23.48	23.6096	8.0524e+06	8.76873e+06	1.01217e+07	8.98095e+06	0.0955378	9.88235e+06	1.04654e+07	1.02981e+07	1.02153e+07	0.0239973	6.79943e+06	8.77923e+06	8.61937e+06	8.06601e+06	0.111329	1.02733e+07	1.17766e+07	1.19895e+07	1.13465e+07	0.0673194	9.69987e+06	1.15827e+07	1.36875e+07	1.16567e+07	0.13973	1.31481e+07	1.24955e+07	1.2903e+07	1.28489e+07	0.0209486
O75915	ARL6IP5	PRA1 family protein 3	6	6	0.537047	0.0235952	+	27.217	27.2445	27.4234	27.9923	27.9428	27.5609	1.55265e+08	1.52754e+08	1.58953e+08	1.55657e+08	0.016355	1.61786e+08	1.55935e+08	1.59057e+08	1.58926e+08	0.0150421	1.67885e+08	1.9296e+08	1.80394e+08	1.80413e+08	0.0567414	2.4015e+08	2.75247e+08	2.84917e+08	2.66771e+08	0.0720982	2.49095e+08	2.44958e+08	2.81212e+08	2.58421e+08	0.0627013	1.87852e+08	2.01259e+08	2.03772e+08	1.97628e+08	0.0353606
P60033	CD81	CD81 antigen	5	5	0.483922	0.0237421		28.6931	28.3951	28.4274	28.965	29.17	28.8324	4.42463e+08	4.1828e+08	4.41023e+08	4.33922e+08	0.0255251	3.46022e+08	3.50404e+08	3.62538e+08	3.52988e+08	0.01979	3.65868e+08	3.64646e+08	3.51062e+08	3.60525e+08	0.0186121	5.37223e+08	5.19833e+08	5.13736e+08	5.23597e+08	0.0190051	5.86021e+08	6.07672e+08	6.17441e+08	6.03711e+08	0.0217478	4.42578e+08	5.1502e+08	4.75605e+08	4.77735e+08	0.0619856
O75643	SNRNP200	U5 small nuclear ribonucleoprotein 200 kDa helicase	23	23	0.299367	0.0237889		25.0148	25.0359	25.0148	25.2353	25.4892	25.239	3.25568e+07	3.52191e+07	3.38227e+07	3.38662e+07	0.0321072	3.51517e+07	3.44589e+07	3.36848e+07	3.44318e+07	0.0174011	3.48106e+07	3.39609e+07	3.27848e+07	3.38521e+07	0.0245368	3.7917e+07	4.11889e+07	3.94698e+07	3.95252e+07	0.0338094	4.79932e+07	4.65834e+07	4.65824e+07	4.7053e+07	0.0141287	3.87216e+07	4.06081e+07	3.94076e+07	3.95791e+07	0.0196987
Q9BR76	CORO1B	Coronin-1B	8	8	0.216756	0.0238537		25.3679	25.5045	25.3511	25.6181	25.5638	25.6918	4.30008e+07	4.36319e+07	4.33312e+07	4.33213e+07	0.00594913	5.16464e+07	4.56563e+07	4.56341e+07	4.76456e+07	0.0593756	4.33859e+07	4.12031e+07	4.38708e+07	4.28199e+07	0.0270964	4.68592e+07	5.42921e+07	5.34958e+07	5.1549e+07	0.0646402	4.81343e+07	4.7845e+07	5.29039e+07	4.96277e+07	0.0467403	5.46382e+07	5.64497e+07	5.13678e+07	5.41519e+07	0.0388346
P13804	ETFA	Electron transfer flavoprotein subunit alpha, mitochondrial	14	14	0.455322	0.0238594		27.6865	27.6663	27.8385	28.1361	28.4073	28.0137	2.1037e+08	2.18393e+08	2.17781e+08	2.15514e+08	0.0169191	2.17834e+08	2.03686e+08	2.18899e+08	2.13473e+08	0.0324812	2.40278e+08	2.38802e+08	2.39777e+08	2.39619e+08	0.00255686	2.87276e+08	3.05563e+08	2.92295e+08	2.95045e+08	0.0261475	3.39439e+08	3.61191e+08	3.66204e+08	3.55611e+08	0.0326684	2.6933e+08	2.68882e+08	2.7505e+08	2.71087e+08	0.0103579
Q96KA5	CLPTM1L	Cleft lip and palate transmembrane protein 1-like protein	2	2	-0.546095	0.0240088	+	21.8674	21.8396	21.4018	21.187	21.1919	21.0917	4.05361e+06	3.616e+06	3.80804e+06	3.82588e+06	0.0468117	3.68092e+06	4.01619e+06	3.56187e+06	3.753e+06	0.0512519	2.87411e+06	2.28152e+06	3.15647e+06	2.7707e+06	0.131592	1.77313e+06	2.22521e+06	3.16373e+06	2.38736e+06	0.2426	2.15878e+06	2.51941e+06	2.50809e+06	2.39543e+06	0.0698819	1.82479e+06	2.67404e+06	2.20538e+06	2.23474e+06	0.155422
P55809	OXCT1	Succinyl-CoA:3-ketoacid coenzyme A transferase 1, mitochondrial	8	8	0.629755	0.024012	+	24.632	24.5404	24.6153	25.1488	25.5609	24.9672	2.64537e+07	2.53761e+07	2.605e+07	2.59599e+07	0.0171235	2.4153e+07	2.60706e+07	2.30747e+07	2.44328e+07	0.0507101	2.58514e+07	2.54478e+07	2.57824e+07	2.56939e+07	0.0068598	3.55704e+07	3.86943e+07	3.73246e+07	3.71964e+07	0.0343722	5.03003e+07	4.80495e+07	5.02559e+07	4.95352e+07	0.0212122	3.28112e+07	3.37315e+07	3.1716e+07	3.27529e+07	0.0251541
Q9NX63	CHCHD3	Coiled-coil-helix-coiled-coil-helix domain-containing protein 3, mitochondrial	3	3	0.145571	0.0240604		25.3477	25.3066	25.2535	25.5075	25.4041	25.433	4.29936e+07	4.22865e+07	4.2801e+07	4.26937e+07	0.00699054	4.24747e+07	4.07196e+07	4.11914e+07	4.14619e+07	0.0178864	4.44435e+07	3.7338e+07	3.82379e+07	4.00065e+07	0.0789597	5.0064e+07	4.64531e+07	4.65019e+07	4.7673e+07	0.0354662	5.11222e+07	4.40582e+07	3.79151e+07	4.43651e+07	0.12163	4.51772e+07	4.32635e+07	4.73516e+07	4.52641e+07	0.0368961
P25789	PSMA4	Proteasome subunit alpha type-4	3	2	-0.505479	0.0241309	+	23.0418	22.6249	22.6755	22.2742	22.3737	22.1778	8.32241e+06	8.41569e+06	9.16779e+06	8.6353e+06	0.0438257	6.46816e+06	6.65497e+06	6.28067e+06	6.46793e+06	0.0236251	5.93356e+06	7.11698e+06	7.04593e+06	6.69882e+06	0.0808949	5.23308e+06	4.56681e+06	5.41729e+06	5.07239e+06	0.0720222	4.67671e+06	6.21094e+06	5.41524e+06	5.4343e+06	0.115285	4.07945e+06	5.3104e+06	4.84371e+06	4.74452e+06	0.106945
O60784	TOM1	Target of Myb protein 1	11	11	-0.304408	0.0241548		25.575	25.7069	25.4102	25.273	25.2467	25.2592	4.78786e+07	4.99458e+07	5.21277e+07	4.9984e+07	0.0347093	5.19697e+07	5.47457e+07	5.75931e+07	5.47695e+07	0.0419171	4.42311e+07	4.47944e+07	4.47438e+07	4.45897e+07	0.00570664	4.14521e+07	3.8532e+07	4.16478e+07	4.0544e+07	0.0351449	3.63204e+07	4.16607e+07	4.14511e+07	3.98108e+07	0.0620315	4.18385e+07	3.87651e+07	3.98699e+07	4.01578e+07	0.0316523
Q9Y639	NPTN	Neuroplastin	2	2	0.45074	0.0242233		25.4614	25.0484	25.1757	25.6838	25.7415	25.6125	4.68873e+07	4.6428e+07	4.51375e+07	4.61509e+07	0.01605	3.43393e+07	3.42237e+07	3.56857e+07	3.47496e+07	0.0190966	3.69257e+07	3.76852e+07	3.91147e+07	3.79086e+07	0.0239395	5.7033e+07	5.17365e+07	5.29006e+07	5.38901e+07	0.0421722	5.7639e+07	5.45024e+07	5.61136e+07	5.6085e+07	0.0228341	5.05279e+07	5.19467e+07	5.14052e+07	5.12933e+07	0.0113975
Q6NUM9	RETSAT	All-trans-retinol 13,14-reductase	2	2	0.634077	0.0243852	+	19.7455	20.2419	20.1581	20.7471	20.8034	20.4972	726328	788880	1.12106e+06	878757	0.19713	1.46035e+06	1.25422e+06	991993	1.23552e+06	0.155128	906266	1.18846e+06	1.42801e+06	1.17425e+06	0.181597	1.66548e+06	1.60741e+06	2.01853e+06	1.76381e+06	0.103	1.57494e+06	1.66287e+06	2.24078e+06	1.8262e+06	0.161727	1.27055e+06	1.55749e+06	1.61734e+06	1.48179e+06	0.102145
Q96JY6	PDLIM2	PDZ and LIM domain protein 2	3	3	-0.606438	0.0244743	+	23.5042	23.4734	23.03	22.8874	22.6509	22.65	1.25237e+07	1.09739e+07	1.21965e+07	1.18981e+07	0.0560603	1.15856e+07	1.112e+07	1.22341e+07	1.16466e+07	0.0392271	8.57559e+06	8.6903e+06	8.42957e+06	8.56515e+06	0.0124575	8.48392e+06	7.50776e+06	7.2845e+06	7.75873e+06	0.067128	6.89799e+06	6.11345e+06	6.74597e+06	6.58581e+06	0.0515843	7.23197e+06	6.57047e+06	5.9429e+06	6.58178e+06	0.0799659
P55072	VCP	Transitional endoplasmic reticulum ATPase	42	39	-0.333946	0.0245269		29.404	29.1509	29.1095	28.8717	28.9335	28.8573	7.2605e+08	7.12712e+08	6.92322e+08	7.10361e+08	0.0195243	5.97132e+08	6.08593e+08	5.82442e+08	5.96056e+08	0.0179565	5.56944e+08	5.7943e+08	6.01232e+08	5.79202e+08	0.0312176	4.83088e+08	5.0407e+08	4.86432e+08	4.91197e+08	0.0187394	4.99773e+08	5.20974e+08	5.17303e+08	5.12683e+08	0.018045	4.76109e+08	4.88712e+08	4.9409e+08	4.86304e+08	0.0154955
P49841	GSK3B	Glycogen synthase kinase-3 beta	2	2	-0.419889	0.0245334		22.3364	22.2857	22.1996	21.9422	21.9893	21.6306	5.79214e+06	5.05852e+06	5.03658e+06	5.29575e+06	0.0663017	4.87745e+06	4.87632e+06	5.58464e+06	5.1128e+06	0.0652555	4.06932e+06	5.58208e+06	4.79893e+06	4.81678e+06	0.128242	3.6354e+06	3.90166e+06	4.55176e+06	4.02961e+06	0.0955148	4.33954e+06	3.66924e+06	4.48091e+06	4.16323e+06	0.0850398	2.89625e+06	3.40315e+06	3.4409e+06	3.24677e+06	0.0764857
Q9P016	THYN1	Thymocyte nuclear protein 1	2	2	0.871845	0.024593	+	18.2967	18.9826	18.7796	19.6042	19.2922	19.778	406911	290208	269984	322368	0.187204	487422	590119	477312	518284	0.0983281	463712	548328	337142	449727	0.192965	876351	734432	779699	796828	0.0742828	653491	667080	605342	641971	0.0412604	745284	985915	964305	898501	0.120979
Q16647	PTGIS	Prostacyclin synthase	22	22	1.21566	0.0246182	+	28.3066	27.2625	28.0711	29.2353	29.2376	28.8142	3.0589e+08	3.35965e+08	3.53836e+08	3.31897e+08	0.0596087	1.72909e+08	1.48572e+08	1.61016e+08	1.60832e+08	0.0617806	2.66801e+08	2.91495e+08	2.8642e+08	2.81572e+08	0.0378165	5.78705e+08	6.65501e+08	6.53212e+08	6.32473e+08	0.0606337	5.66731e+08	6.67962e+08	6.64805e+08	6.33166e+08	0.074221	4.71069e+08	4.70546e+08	4.74747e+08	4.72121e+08	0.00395962
Q9H2U2	PPA2	Inorganic pyrophosphatase 2, mitochondrial	7	6	0.396035	0.0248564		24.3307	24.5463	24.5285	24.824	25.0359	24.7338	2.02784e+07	2.10626e+07	2.19148e+07	2.10853e+07	0.0316935	2.28095e+07	2.63259e+07	2.44902e+07	2.45418e+07	0.0585137	2.45226e+07	2.35534e+07	2.46274e+07	2.42345e+07	0.0199506	2.9402e+07	2.87922e+07	3.07596e+07	2.96513e+07	0.0277324	3.36418e+07	3.47031e+07	3.47304e+07	3.43584e+07	0.0147524	2.81728e+07	2.82783e+07	2.72897e+07	2.79136e+07	0.0158789
O75165	DNAJC13	DnaJ homolog subfamily C member 13	9	9	-0.309607	0.0249709		23.655	23.6898	23.7649	23.5401	23.255	23.3857	1.27246e+07	1.26919e+07	1.42091e+07	1.32085e+07	0.0535757	1.4088e+07	1.40713e+07	1.24358e+07	1.35317e+07	0.05727	1.42069e+07	1.39788e+07	1.45763e+07	1.4254e+07	0.0172704	1.18333e+07	1.34105e+07	1.13499e+07	1.21979e+07	0.072134	9.84104e+06	9.20814e+06	1.0983e+07	1.00107e+07	0.0733664	1.02968e+07	1.04411e+07	1.21404e+07	1.09594e+07	0.0763882
Q16836	HADH	Hydroxyacyl-coenzyme A dehydrogenase, mitochondrial	9	9	0.524963	0.0250423	+	26.2714	26.3828	26.53	26.8858	27.1604	26.7129	7.70019e+07	8.37019e+07	8.22337e+07	8.09792e+07	0.0355092	8.37355e+07	8.80297e+07	9.066e+07	8.74751e+07	0.032626	9.43158e+07	9.76315e+07	9.88173e+07	9.69215e+07	0.0196561	1.12855e+08	1.28056e+08	1.31108e+08	1.24006e+08	0.0643756	1.32519e+08	1.64863e+08	1.51726e+08	1.49703e+08	0.088719	1.09829e+08	1.06284e+08	1.14701e+08	1.10271e+08	0.0312907
P48444	ARCN1	Coatomer subunit delta	10	9	-0.503442	0.0250451		24.4377	24.6868	24.4509	24.1272	23.7837	24.1541	2.38499e+07	2.29631e+07	2.13567e+07	2.27232e+07	0.0454109	2.74508e+07	2.68442e+07	2.67261e+07	2.7007e+07	0.0117542	2.28429e+07	2.27993e+07	2.31562e+07	2.29328e+07	0.00693208	1.89228e+07	1.91813e+07	1.68683e+07	1.83241e+07	0.0564744	1.57075e+07	1.40773e+07	1.354e+07	1.44416e+07	0.0638174	1.87265e+07	1.75251e+07	1.97541e+07	1.86686e+07	0.0487932
P23497	SP100	Nuclear autoantigen Sp-100	4	4	0.360723	0.0250791		22.44	22.3884	22.5427	22.9495	22.8651	22.6387	5.90622e+06	5.23464e+06	5.93301e+06	5.69129e+06	0.0567684	5.1264e+06	6.46539e+06	4.87515e+06	5.48898e+06	0.127165	5.91434e+06	5.89212e+06	6.51945e+06	6.10864e+06	0.0475772	8.6692e+06	7.60972e+06	8.02836e+06	8.10243e+06	0.0537729	8.7148e+06	7.26629e+06	6.92885e+06	7.63665e+06	0.101447	5.82224e+06	6.14157e+06	7.63819e+06	6.534e+06	0.121149
P12235	SLC25A4	ADP/ATP translocase 1	12	3	0.658552	0.0252202	+	21.9243	22.2006	22.4298	22.9423	22.9829	22.6051	3.68797e+06	4.37765e+06	3.87615e+06	3.98059e+06	0.073125	4.87675e+06	4.57322e+06	5.01619e+06	4.82206e+06	0.0383511	5.57265e+06	5.52723e+06	5.85705e+06	5.65231e+06	0.0258219	6.74523e+06	8.56135e+06	8.86915e+06	8.05858e+06	0.116291	7.03412e+06	9.30168e+06	8.5253e+06	8.28703e+06	0.113543	7.01453e+06	5.58548e+06	6.53015e+06	6.37672e+06	0.0930584
O60814;P06899;P23527;P33778;P57053;P58876;P62807;Q16778;Q5QNW6;Q93079;Q99877;Q99879;Q6DN03;Q6DRA6;Q99880	#N/A	Histone H2B type 1-K	13	13	0.249456	0.0254962		31.3033	31.4871	31.4629	31.6586	31.7453	31.5978	2.5469e+09	2.66009e+09	2.74655e+09	2.65118e+09	0.0308358	2.99722e+09	3.06927e+09	2.96091e+09	3.00913e+09	0.0149652	2.89542e+09	3.03819e+09	2.95485e+09	2.96282e+09	0.0197642	2.99577e+09	3.67509e+09	3.49217e+09	3.38768e+09	0.0847209	3.58423e+09	3.44942e+09	3.76381e+09	3.59915e+09	0.0357808	3.26797e+09	2.98437e+09	3.51039e+09	3.25424e+09	0.0660568
P00390	GSR	Glutathione reductase, mitochondrial	3	3	-0.386506	0.0255419		21.7791	21.9655	21.8009	21.2745	21.5765	21.5349	3.30762e+06	3.69108e+06	3.79758e+06	3.59876e+06	0.058467	4.55008e+06	3.70478e+06	4.0305e+06	4.09512e+06	0.0850046	3.55163e+06	3.57335e+06	3.83563e+06	3.65354e+06	0.0353264	2.52303e+06	2.33094e+06	2.75592e+06	2.53663e+06	0.0685003	2.97182e+06	3.50645e+06	2.90385e+06	3.12738e+06	0.0861681	2.86768e+06	2.90585e+06	3.34169e+06	3.03841e+06	0.0707663
Q99715	COL12A1	Collagen alpha-1(XII) chain	75	72	-2.60084	0.0255877	+	29.5681	30.5028	28.193	27.3366	26.9307	26.194	7.93907e+08	7.95691e+08	7.9824e+08	7.95946e+08	0.00223402	1.50679e+09	1.51588e+09	1.54161e+09	1.52142e+09	0.00969149	3.02862e+08	3.05064e+08	3.12624e+08	3.0685e+08	0.0136242	1.65831e+08	1.71378e+08	1.71257e+08	1.69489e+08	0.0152632	1.26512e+08	1.28948e+08	1.28317e+08	1.27926e+08	0.00806961	7.59139e+07	7.83574e+07	7.60276e+07	7.67663e+07	0.0146681
Q9H4G4	GLIPR2	Golgi-associated plant pathogenesis-related protein 1	4	4	0.343479	0.0256378		26.6181	26.5448	26.8504	27.0401	27.0609	26.9428	1.02243e+08	1.01845e+08	1.0423e+08	1.02772e+08	0.0101492	9.46777e+07	9.9184e+07	9.97317e+07	9.78644e+07	0.0231388	1.22304e+08	1.21749e+08	1.19428e+08	1.2116e+08	0.0102805	1.41839e+08	1.39302e+08	1.34175e+08	1.38439e+08	0.0230257	1.38527e+08	1.40921e+08	1.4033e+08	1.39926e+08	0.00727599	1.2288e+08	1.31561e+08	1.31394e+08	1.28612e+08	0.031516
P52943	CRIP2	Cysteine-rich protein 2	4	4	0.848921	0.0257192	+	24.217	24.141	23.9316	25.2607	25.0772	24.4984	2.002e+07	1.95493e+07	1.89546e+07	1.95079e+07	0.0223463	1.91016e+07	1.69073e+07	1.94068e+07	1.84719e+07	0.0602709	1.55573e+07	1.73456e+07	1.506e+07	1.59876e+07	0.0613868	4.18031e+07	3.84693e+07	4.03876e+07	4.022e+07	0.0339678	3.64496e+07	3.53331e+07	3.44659e+07	3.54162e+07	0.0229269	2.25808e+07	2.45932e+07	2.3828e+07	2.36673e+07	0.0350418
Q3ZCQ8	TIMM50	Mitochondrial import inner membrane translocase subunit TIM50	3	3	0.314498	0.0257666		21.2066	21.1269	21.1395	21.4067	21.6453	21.3645	2.37709e+06	2.70339e+06	2.16915e+06	2.41655e+06	0.0909896	2.12527e+06	2.38145e+06	2.36216e+06	2.28963e+06	0.0508741	2.28034e+06	2.18575e+06	2.4661e+06	2.31073e+06	0.0503971	3.1306e+06	2.70819e+06	2.50068e+06	2.77982e+06	0.0942883	3.57527e+06	3.30244e+06	2.95793e+06	3.27855e+06	0.0770449	2.5314e+06	2.76581e+06	2.79508e+06	2.69743e+06	0.0437478
O95166	GABARAP	Gamma-aminobutyric acid receptor-associated protein	3	3	-0.339785	0.0259094		20.9448	20.7855	20.7623	20.4182	20.4044	20.6506	2.05671e+06	1.74644e+06	2.252e+06	2.01838e+06	0.103135	1.92756e+06	2.07655e+06	1.41815e+06	1.80742e+06	0.155966	1.92389e+06	1.7322e+06	1.67953e+06	1.77854e+06	0.0590394	1.33472e+06	1.33742e+06	1.53147e+06	1.40121e+06	0.0657423	1.77567e+06	1.37533e+06	1.01244e+06	1.38781e+06	0.224608	1.99724e+06	1.5871e+06	1.35374e+06	1.64603e+06	0.161597
P49755	TMED10	Transmembrane emp24 domain-containing protein 10	15	14	-0.284147	0.0259132		26.9842	27.1584	26.8986	26.7612	26.7586	26.669	1.36899e+08	1.3177e+08	1.29605e+08	1.32758e+08	0.0230404	1.43739e+08	1.5186e+08	1.5378e+08	1.49793e+08	0.0290522	1.18549e+08	1.28846e+08	1.27935e+08	1.2511e+08	0.0372006	1.09359e+08	1.15745e+08	1.16125e+08	1.13743e+08	0.0272898	1.07544e+08	1.1127e+08	1.21801e+08	1.13539e+08	0.0531756	9.92755e+07	1.11966e+08	1.0886e+08	1.06701e+08	0.0506214
P49903	SEPHS1	Selenide, water dikinase 1	4	4	0.616978	0.0259715	+	20.5069	21.0426	20.9316	21.2989	21.5117	21.5213	1.4914e+06	1.80327e+06	1.16824e+06	1.48764e+06	0.174278	2.09584e+06	2.02979e+06	2.34614e+06	2.15725e+06	0.0631615	1.67609e+06	2.4271e+06	1.90452e+06	2.00257e+06	0.156967	2.49016e+06	2.58324e+06	2.65389e+06	2.57576e+06	0.0260311	3.39375e+06	2.72625e+06	2.85186e+06	2.99062e+06	0.0968471	3.07656e+06	2.86598e+06	3.08776e+06	3.0101e+06	0.0338891
Q16658	FSCN1	Fascin	20	19	0.289219	0.0259974		27.189	27.3578	27.391	27.5536	27.7129	27.5389	1.56312e+08	1.48995e+08	1.52641e+08	1.52649e+08	0.0195702	1.7298e+08	1.68271e+08	1.73623e+08	1.71625e+08	0.0139001	1.74052e+08	1.73585e+08	1.80708e+08	1.76115e+08	0.0184735	1.92357e+08	2.02464e+08	1.95224e+08	1.96682e+08	0.021624	2.18237e+08	2.18994e+08	2.22568e+08	2.19933e+08	0.0085867	1.84479e+08	1.98581e+08	2.01385e+08	1.94815e+08	0.0379722
Q13547	HDAC1	Histone deacetylase 1	3	2	0.410661	0.0260091		21.8152	21.9024	22.1795	22.4651	22.3129	22.3511	3.35681e+06	3.99316e+06	3.72456e+06	3.69151e+06	0.0706594	3.72783e+06	4.19264e+06	3.8331e+06	3.91786e+06	0.0507914	4.50453e+06	4.51887e+06	5.24083e+06	4.75474e+06	0.0722995	5.87391e+06	6.11185e+06	5.37883e+06	5.7882e+06	0.0527507	3.72629e+06	6.56468e+06	5.34045e+06	5.21047e+06	0.22309	5.8013e+06	5.07639e+06	5.18209e+06	5.35326e+06	0.0597273
Q5K4L6	SLC27A3	Long-chain fatty acid transport protein 3	2	2	1.10364	0.0262337	+	20.8802	20.3857	20.1206	21.9495	21.5961	21.1519	1.75821e+06	1.88519e+06	2.13735e+06	1.92691e+06	0.0817737	1.40347e+06	1.23626e+06	1.45888e+06	1.3662e+06	0.0692627	1.02367e+06	1.21453e+06	1.18825e+06	1.14215e+06	0.0739511	3.22244e+06	4.01079e+06	4.90218e+06	4.04514e+06	0.169631	2.56663e+06	3.73962e+06	3.19938e+06	3.16854e+06	0.151289	2.49626e+06	2.23807e+06	2.25176e+06	2.3287e+06	0.0509374
P61019	RAB2A	Ras-related protein Rab-2A	10	9	-0.315908	0.0264804		26.021	25.7162	25.9232	25.5825	25.5982	25.532	7.10359e+07	6.95021e+07	6.37434e+07	6.80938e+07	0.0461023	5.32895e+07	5.65766e+07	5.55126e+07	5.51262e+07	0.0248426	6.50249e+07	5.97298e+07	6.61408e+07	6.36318e+07	0.0439481	5.61953e+07	4.86964e+07	4.58499e+07	5.02472e+07	0.0868413	5.51541e+07	5.04644e+07	4.67701e+07	5.07962e+07	0.0675399	4.92112e+07	4.70443e+07	4.92993e+07	4.85182e+07	0.0214939
P68104;Q5VTE0	#N/A	Elongation factor 1-alpha 1	21	18	-0.41353	0.0265361		30.1535	30.234	29.8979	29.7137	29.5559	29.7752	1.22826e+09	1.19737e+09	1.15716e+09	1.19427e+09	0.0243732	1.36703e+09	1.2159e+09	1.20564e+09	1.26286e+09	0.0584226	1.00342e+09	9.99309e+08	9.98372e+08	1.00037e+09	0.00219202	8.29365e+08	9.06091e+08	9.0603e+08	8.80495e+08	0.0410617	7.45233e+08	7.6579e+08	8.56658e+08	7.89227e+08	0.0613437	9.16051e+08	9.0145e+08	9.38962e+08	9.18821e+08	0.016803
Q1KMD3	HNRNPUL2	Heterogeneous nuclear ribonucleoprotein U-like protein 2	24	24	0.271933	0.0266766		27.0296	27.0711	27.1115	27.3745	27.4551	27.1984	1.37303e+08	1.35815e+08	1.37908e+08	1.37009e+08	0.0064198	1.42323e+08	1.45482e+08	1.34284e+08	1.40696e+08	0.0335074	1.38998e+08	1.4464e+08	1.5243e+08	1.45356e+08	0.0378856	1.72933e+08	1.77293e+08	1.72994e+08	1.74407e+08	0.011703	1.82344e+08	1.82512e+08	1.8837e+08	1.84409e+08	0.015195	1.52028e+08	1.54269e+08	1.5447e+08	1.53589e+08	0.00720497
Q9Y4G6	TLN2	Talin-2	18	11	0.201662	0.0268024		23.7695	23.9225	23.8576	24.1253	24.0359	23.9933	1.274e+07	1.42855e+07	1.57398e+07	1.42551e+07	0.0859224	1.54146e+07	1.51312e+07	1.70947e+07	1.58802e+07	0.0545684	1.56678e+07	1.44013e+07	1.5414e+07	1.5161e+07	0.0360868	1.72594e+07	1.79717e+07	1.95199e+07	1.82503e+07	0.0517056	1.63956e+07	1.69818e+07	1.83606e+07	1.7246e+07	0.0477611	1.68837e+07	1.63834e+07	1.67834e+07	1.66835e+07	0.0129541
P49589	CARS1	Cysteine--tRNA ligase, cytoplasmic	5	5	-0.851295	0.0269049	+	21.3478	21.5755	21.1006	20.5233	20.114	20.8328	2.47871e+06	2.76525e+06	2.76258e+06	2.66885e+06	0.0503785	3.47486e+06	3.29558e+06	2.60508e+06	3.12517e+06	0.119985	2.72061e+06	2.20605e+06	1.81921e+06	2.24863e+06	0.1642	1.81253e+06	1.42479e+06	1.28368e+06	1.507e+06	0.148369	1.37849e+06	1.05645e+06	969341	1.13476e+06	0.155074	2.09863e+06	1.82229e+06	1.6821e+06	1.86767e+06	0.0926547
Q07666	KHDRBS1	KH domain-containing, RNA-binding, signal transduction-associated protein 1	7	7	0.508001	0.0270249		24.9584	24.9716	25.0732	25.7645	25.2643	25.4984	2.99632e+07	3.2715e+07	3.50785e+07	3.25856e+07	0.0641476	3.1895e+07	3.28697e+07	3.40683e+07	3.29443e+07	0.0269798	3.30327e+07	3.56914e+07	3.71558e+07	3.52933e+07	0.0483552	5.30549e+07	5.77334e+07	6.01655e+07	5.69846e+07	0.0517824	3.66806e+07	4.35578e+07	4.06378e+07	4.02921e+07	0.0699453	4.89322e+07	4.46126e+07	4.87528e+07	4.74325e+07	0.0420665
P61313	RPL15	60S ribosomal protein L15	4	4	-0.321802	0.0270987		26.1223	26.0438	25.8712	25.7597	25.7379	25.5743	7.23718e+07	7.19697e+07	7.47952e+07	7.30456e+07	0.0170851	6.50514e+07	6.74859e+07	7.49895e+07	6.91756e+07	0.0611417	6.14595e+07	6.17864e+07	6.08911e+07	6.1379e+07	0.00602652	6.02834e+07	5.42891e+07	5.5869e+07	5.68138e+07	0.04465	5.14875e+07	5.72612e+07	5.91266e+07	5.59585e+07	0.0581121	4.98941e+07	5.12007e+07	4.87885e+07	4.99611e+07	0.0197335
P62861	FAU	40S ribosomal protein S30	4	4	-0.431847	0.0271657		24.9197	24.5965	24.806	24.2958	24.2248	24.506	3.1093e+07	3.46285e+07	2.94916e+07	3.17377e+07	0.0676205	2.79575e+07	2.52159e+07	2.29295e+07	2.53676e+07	0.0810262	3.25169e+07	2.74568e+07	2.80216e+07	2.93318e+07	0.0771858	2.36077e+07	1.97129e+07	1.84633e+07	2.05946e+07	0.106375	2.47131e+07	1.8261e+07	1.58442e+07	1.96061e+07	0.190939	2.5093e+07	2.42863e+07	2.20989e+07	2.38261e+07	0.0530892
O75208	COQ9	Ubiquinone biosynthesis protein COQ9, mitochondrial	3	3	0.948851	0.0272185	+	19.2208	19.0769	19.661	19.895	20.6453	20.265	568439	734270	531769	611493	0.14407	495919	640805	521912	552879	0.11408	1.03964e+06	727706	720786	829378	0.179298	1.18255e+06	891404	851858	975271	0.151194	1.39798e+06	1.60511e+06	1.90821e+06	1.6371e+06	0.127987	990962	1.40431e+06	1.37038e+06	1.25522e+06	0.149274
Q8NBS9	TXNDC5	Thioredoxin domain-containing protein 5	14	13	-0.255554	0.0273571		28.3399	28.5688	28.5576	28.2381	28.2131	28.2485	3.35064e+08	3.41629e+08	3.42583e+08	3.39759e+08	0.00983747	4.01836e+08	3.86578e+08	4.06067e+08	3.9816e+08	0.0210213	3.81678e+08	4.05293e+08	3.98327e+08	3.95099e+08	0.0250757	3.14749e+08	3.15271e+08	3.19781e+08	3.166e+08	0.00713531	3.16428e+08	3.02995e+08	3.14038e+08	3.11154e+08	0.0188045	3.00693e+08	3.2923e+08	3.2679e+08	3.18904e+08	0.0405002
Q9UG63	ABCF2	ATP-binding cassette sub-family F member 2	3	2	-0.714719	0.0274409	+	19.2781	18.9967	18.8856	18.5326	17.9889	18.4947	720698	564635	621933	635755	0.101388	474950	538671	555666	523095	0.0664197	418914	577077	456957	484316	0.139177	451480	332933	353180	379197	0.136539	276902	225264	278256	260141	0.0948254	355508	331642	420983	369378	0.10225
Q16850	CYP51A1	Lanosterol 14-alpha demethylase	7	7	0.651061	0.0275624	+	23.9043	24.0691	23.9584	24.6209	24.9539	24.3101	1.61714e+07	1.56239e+07	1.52783e+07	1.56912e+07	0.0234347	1.72702e+07	1.72324e+07	1.8315e+07	1.76059e+07	0.0284951	1.54294e+07	1.62113e+07	1.73349e+07	1.63252e+07	0.0479051	2.3095e+07	2.65614e+07	2.77397e+07	2.57987e+07	0.0764147	2.94933e+07	3.52454e+07	3.26939e+07	3.24775e+07	0.0724579	2.13757e+07	1.93302e+07	2.17995e+07	2.08352e+07	0.0517445
Q96RQ3	MCCC1	Methylcrotonoyl-CoA carboxylase subunit alpha, mitochondrial	6	5	0.538221	0.0277104	+	22.3156	21.9742	22.3376	22.7389	22.937	22.5662	4.86177e+06	5.46266e+06	5.34757e+06	5.224e+06	0.0498489	3.87768e+06	4.1125e+06	4.37232e+06	4.12083e+06	0.0490242	5.63511e+06	4.91351e+06	5.3375e+06	5.29537e+06	0.055915	6.86862e+06	6.89631e+06	7.23212e+06	6.99902e+06	0.0236052	8.52037e+06	7.70144e+06	7.87884e+06	8.03355e+06	0.0437876	6.14797e+06	5.92036e+06	6.57243e+06	6.21359e+06	0.0434888
O75880	SCO1	Protein SCO1 homolog, mitochondrial	4	4	0.332128	0.0277434		22.5708	22.6253	22.6298	22.9812	23.0838	22.7574	6.32871e+06	6.04874e+06	6.30725e+06	6.22824e+06	0.0204267	6.63867e+06	6.38632e+06	6.3828e+06	6.46927e+06	0.0185181	6.37666e+06	6.76529e+06	6.31557e+06	6.48584e+06	0.0307084	8.73775e+06	8.08928e+06	8.01065e+06	8.27923e+06	0.0393527	9.38059e+06	9.13635e+06	8.14201e+06	8.88631e+06	0.06028	6.78782e+06	7.7422e+06	6.72946e+06	7.08649e+06	0.0655142
Q14738	PPP2R5D	Serine/threonine-protein phosphatase 2A 56 kDa regulatory subunit delta isoform	3	3	0.677766	0.0278264	+	21.4273	21.953	21.4576	22.3619	22.4273	22.0821	2.93658e+06	2.70271e+06	2.80958e+06	2.81629e+06	0.0339426	4.35535e+06	4.16856e+06	3.64682e+06	4.05691e+06	0.073908	2.42012e+06	3.29954e+06	2.9184e+06	2.87935e+06	0.125057	5.25677e+06	6.20831e+06	4.69744e+06	5.38751e+06	0.115767	4.70804e+06	5.57603e+06	6.63539e+06	5.63982e+06	0.139744	4.60628e+06	4.18014e+06	4.52225e+06	4.43622e+06	0.0415445
P57764	GSDMD	Gasdermin-D	2	2	-1.235	0.0279031	+	23.4398	23.2904	22.3005	21.7225	21.6745	21.9288	1.07724e+07	1.18029e+07	1.15611e+07	1.13788e+07	0.0386664	1.04885e+07	9.44879e+06	1.084e+07	1.02591e+07	0.0575744	4.36396e+06	4.44539e+06	6.68789e+06	5.16575e+06	0.208456	1.78444e+06	2.58898e+06	6.00787e+06	3.46043e+06	0.529129	1.59429e+06	3.76614e+06	4.68111e+06	3.34718e+06	0.386756	2.29587e+06	5.09979e+06	4.58098e+06	3.99221e+06	0.305107
P16989	YBX3	Y-box-binding protein 3	2	2	-1.52855	0.0279689	+	22.3674	22.1302	21.6843	20.3276	21.3159	19.9528	3.96315e+06	5.96954e+06	6.30012e+06	5.41094e+06	0.190835	4.3504e+06	4.82672e+06	4.59408e+06	4.5904e+06	0.0423661	3.04777e+06	3.40938e+06	3.65271e+06	3.36995e+06	0.0737493	1.24809e+06	1.31839e+06	1.38129e+06	1.31592e+06	0.0413462	2.60363e+06	2.43878e+06	2.78885e+06	2.61042e+06	0.0547792	847031	1.09315e+06	1.10428e+06	1.01482e+06	0.116997
Q9Y305	ACOT9	Acyl-coenzyme A thioesterase 9, mitochondrial	12	12	0.689349	0.0280042	+	25.1908	24.7846	24.9134	25.654	25.9383	25.3645	3.72916e+07	3.8938e+07	3.87869e+07	3.83388e+07	0.0193806	2.7152e+07	2.88591e+07	3.05918e+07	2.88676e+07	0.0486477	3.28534e+07	2.8914e+07	3.31214e+07	3.16296e+07	0.0608076	5.03594e+07	5.16372e+07	5.64687e+07	5.28218e+07	0.0498096	5.72315e+07	6.64574e+07	6.9292e+07	6.4327e+07	0.0800442	4.21069e+07	4.40718e+07	4.32993e+07	4.31594e+07	0.0187271
Q9BY32	ITPA	Inosine triphosphate pyrophosphatase	4	4	0.704732	0.0281124	+	22.3988	22.8783	22.3831	23.2463	23.4923	23.0359	5.74697e+06	5.43061e+06	5.41374e+06	5.53044e+06	0.0277128	8.7041e+06	7.27897e+06	7.1366e+06	7.70656e+06	0.0918388	4.34951e+06	5.85857e+06	6.19619e+06	5.46809e+06	0.146829	9.48092e+06	9.80314e+06	1.05667e+07	9.95026e+06	0.0457598	1.05622e+07	1.2584e+07	1.23342e+07	1.18268e+07	0.0761008	9.39663e+06	8.75197e+06	7.65137e+06	8.59999e+06	0.083786
P12814	ACTN1	Alpha-actinin-1	56	36	-0.786725	0.0281649	+	29.2086	29.3556	28.6195	28.3058	28.1518	28.3659	6.29387e+08	6.17304e+08	6.14463e+08	6.20385e+08	0.0104298	6.67783e+08	7.07614e+08	6.8548e+08	6.86959e+08	0.0237197	4.19982e+08	3.92295e+08	4.2495e+08	4.12409e+08	0.0348355	3.42277e+08	3.25127e+08	3.28066e+08	3.31823e+08	0.0225689	3.00594e+08	2.97214e+08	2.96877e+08	2.98228e+08	0.00562779	3.3868e+08	3.5201e+08	3.47082e+08	3.45924e+08	0.0159091
P62750	RPL23A	60S ribosomal protein L23a	7	7	-0.359867	0.0282365		26.701	26.4519	26.6603	26.2684	26.1058	26.3594	1.12479e+08	1.15392e+08	9.94203e+07	1.09097e+08	0.0636603	9.11868e+07	9.31441e+07	9.1061e+07	9.17973e+07	0.0103895	1.12026e+08	1.03901e+08	1.02255e+08	1.0606e+08	0.0402715	8.58893e+07	7.9466e+07	7.71445e+07	8.08332e+07	0.0457564	7.9239e+07	7.21993e+07	6.52109e+07	7.22164e+07	0.0793023	8.5776e+07	9.14275e+07	8.1082e+07	8.60951e+07	0.0491265
Q9NZN3	EHD3	EH domain-containing protein 3	20	11	-2.0871	0.0282875	+	23.6492	25.7296	24.573	22.2923	22.5752	22.823	1.28584e+07	1.31262e+07	1.34823e+07	1.31556e+07	0.0194255	5.80652e+07	5.455e+07	5.43038e+07	5.56397e+07	0.0308786	2.61553e+07	2.34813e+07	2.52388e+07	2.49585e+07	0.0444536	5.13305e+06	4.92057e+06	5.35568e+06	5.13643e+06	0.0345858	6.328e+06	6.83901e+06	5.5797e+06	6.2489e+06	0.0827578	7.93025e+06	6.9064e+06	7.42357e+06	7.42007e+06	0.0563325
P61978	HNRNPK	Heterogeneous nuclear ribonucleoprotein K	15	14	0.263915	0.0283307		28.9088	29.1288	29.027	29.3557	29.3023	29.1984	4.92425e+08	5.06573e+08	5.11685e+08	5.03561e+08	0.0161769	6.02571e+08	5.67631e+08	5.91534e+08	5.87245e+08	0.0248325	5.34419e+08	5.44067e+08	5.61489e+08	5.46658e+08	0.0204918	6.38165e+08	7.00954e+08	7.21191e+08	6.8677e+08	0.05147	6.71635e+08	6.43658e+08	6.69722e+08	6.61672e+08	0.0192869	5.93288e+08	6.15324e+08	6.40569e+08	6.16394e+08	0.0313386
P27635	RPL10	60S ribosomal protein L10	11	11	-0.171819	0.0283581		27.8948	27.9588	27.8148	27.7762	27.6975	27.6793	2.51045e+08	2.48801e+08	2.48831e+08	2.49559e+08	0.00421094	2.61226e+08	2.58815e+08	2.62606e+08	2.60882e+08	0.00600517	2.4189e+08	2.25147e+08	2.41268e+08	2.36102e+08	0.0328255	2.2456e+08	2.23105e+08	2.41916e+08	2.2986e+08	0.0371755	2.23715e+08	2.04449e+08	2.24807e+08	2.17657e+08	0.0429583	2.0923e+08	2.14294e+08	2.21289e+08	2.14938e+08	0.0230018
Q00688	FKBP3	Peptidyl-prolyl cis-trans isomerase FKBP3	6	6	-0.267044	0.0284214		25.3766	25.2928	25.4262	24.963	25.1385	25.1931	4.33501e+07	4.46111e+07	4.27271e+07	4.35628e+07	0.017991	4.25183e+07	4.07939e+07	4.00047e+07	4.11056e+07	0.025534	4.61834e+07	4.43729e+07	4.47084e+07	4.50882e+07	0.0174411	3.46196e+07	3.04885e+07	3.30059e+07	3.27046e+07	0.0519776	3.92589e+07	3.51946e+07	3.63495e+07	3.69343e+07	0.0462988	3.87257e+07	3.87969e+07	3.75567e+07	3.83598e+07	0.0148227
Q9NZU5	LMCD1	LIM and cysteine-rich domains protein 1	10	10	-1.19383	0.0284271	+	25.1866	25.0271	24.1134	23.7708	23.3546	23.6202	3.80086e+07	3.89777e+07	3.75761e+07	3.81875e+07	0.0153455	3.65182e+07	3.38068e+07	3.22463e+07	3.41904e+07	0.0516209	1.84884e+07	1.73503e+07	1.86076e+07	1.81488e+07	0.0312247	1.54063e+07	1.34557e+07	1.40763e+07	1.43128e+07	0.056852	1.27755e+07	9.94529e+06	9.45602e+06	1.07256e+07	0.136421	1.27077e+07	1.2895e+07	1.30798e+07	1.28941e+07	0.0117827
Q8NFW8	CMAS	N-acylneuraminate cytidylyltransferase	3	3	0.651515	0.0284657	+	20.4375	21.0691	20.8651	21.5356	21.4476	21.343	1.46842e+06	1.36225e+06	1.42197e+06	1.41755e+06	0.0306537	2.06591e+06	2.23689e+06	2.29974e+06	2.20085e+06	0.0448933	2.04527e+06	1.63266e+06	2.04975e+06	1.90923e+06	0.102436	3.09819e+06	2.84419e+06	3.18888e+06	3.04375e+06	0.04793	2.8448e+06	2.7948e+06	2.9356e+06	2.8584e+06	0.0203899	2.99395e+06	2.51364e+06	2.47743e+06	2.66167e+06	0.088449
Q6WCQ1	MPRIP	Myosin phosphatase Rho-interacting protein	9	9	-0.630173	0.0285026	+	23.4157	23.1168	22.9138	22.7295	22.3188	22.5074	1.13995e+07	1.13761e+07	1.07937e+07	1.11898e+07	0.0250428	8.86784e+06	9.43888e+06	8.98194e+06	9.09622e+06	0.0271249	8.17924e+06	7.87932e+06	7.64793e+06	7.90216e+06	0.0275251	7.02254e+06	6.52665e+06	7.31479e+06	6.95466e+06	0.0467769	4.97205e+06	5.13164e+06	5.5911e+06	5.2316e+06	0.0501613	5.44721e+06	6.38696e+06	6.05283e+06	5.96233e+06	0.0652347
Q9UN70	PCDHGC3	Protocadherin gamma-C3	3	3	0.659803	0.0286737	+	20.9098	21.3645	21.0821	21.9423	21.9061	21.4874	1.56826e+06	2.30371e+06	2.03658e+06	1.96952e+06	0.154335	2.93962e+06	2.65982e+06	2.50086e+06	2.7001e+06	0.0671736	2.60986e+06	1.95785e+06	2.10217e+06	2.22329e+06	0.125769	5.13901e+06	3.46439e+06	3.48058e+06	4.02799e+06	0.195045	3.27222e+06	4.46844e+06	4.04232e+06	3.92766e+06	0.126039	3.23591e+06	2.77454e+06	2.81938e+06	2.94327e+06	0.0705779
Q8IYU8	MICU2	Calcium uptake protein 2, mitochondrial	2	2	0.600447	0.02913	+	21.5356	20.9951	21.3376	21.9495	22.002	21.7182	2.72423e+06	3.13863e+06	3.24988e+06	3.03758e+06	0.0744591	2.14266e+06	1.96161e+06	2.15117e+06	2.08514e+06	0.0419261	2.59528e+06	2.26601e+06	3.08988e+06	2.65039e+06	0.127752	3.66695e+06	3.80604e+06	4.66965e+06	4.04754e+06	0.109584	4.39288e+06	3.99048e+06	4.20725e+06	4.19687e+06	0.039182	3.26706e+06	3.29149e+06	3.7859e+06	3.44815e+06	0.0693216
Q9H0W9	C11orf54	Ester hydrolase C11orf54	2	2	-0.593184	0.0292528	+	21.8538	21.3	21.3716	20.8816	20.9949	20.8693	3.7426e+06	4.01799e+06	3.6095e+06	3.79003e+06	0.0448817	2.87879e+06	2.36135e+06	2.50548e+06	2.58187e+06	0.0844516	2.77944e+06	2.79947e+06	2.56108e+06	2.71333e+06	0.0397924	2.07511e+06	1.93818e+06	1.78261e+06	1.93197e+06	0.0618519	1.86771e+06	1.94266e+06	2.45881e+06	2.08973e+06	0.125743	1.94072e+06	2.02758e+06	1.77834e+06	1.91555e+06	0.0539269
Q15428	SF3A2	Splicing factor 3A subunit 2	6	6	0.35	0.0292612		23.0476	23.2961	23.2521	23.4041	23.6209	23.6209	9.06385e+06	8.34127e+06	8.60264e+06	8.66925e+06	0.0344581	1.04594e+07	1.02009e+07	1.01766e+07	1.0279e+07	0.0124532	9.58701e+06	1.01799e+07	1.02105e+07	9.99247e+06	0.0287195	1.05667e+07	1.15067e+07	1.12087e+07	1.1094e+07	0.0353516	1.23743e+07	1.30204e+07	1.3432e+07	1.29423e+07	0.0336353	1.18155e+07	1.36564e+07	1.32788e+07	1.29169e+07	0.0614639
Q13449	LSAMP	Limbic system-associated membrane protein	3	3	-1.48895	0.0293637	+	22.9925	23.7086	23.0374	22.4876	21.1866	21.5975	8.82563e+06	8.24417e+06	7.96611e+06	8.3453e+06	0.0429117	1.46587e+07	1.32606e+07	1.32068e+07	1.37087e+07	0.0490305	8.48641e+06	8.62206e+06	8.71762e+06	8.6087e+06	0.0110196	6.40203e+06	5.90371e+06	5.33698e+06	5.88091e+06	0.0739857	2.92092e+06	2.24188e+06	1.99717e+06	2.38665e+06	0.163729	2.98901e+06	3.51973e+06	3.01065e+06	3.17313e+06	0.0772874
P30038	ALDH4A1	Delta-1-pyrroline-5-carboxylate dehydrogenase, mitochondrial	2	2	0.559121	0.0294478	+	21.4923	21.6096	21.4775	22.1519	22.3294	21.7756	2.52666e+06	3.04361e+06	3.28573e+06	2.952e+06	0.107245	3.29807e+06	3.32044e+06	2.98614e+06	3.20155e+06	0.047661	2.8565e+06	2.84542e+06	3.05133e+06	2.91775e+06	0.0324084	4.40819e+06	4.93093e+06	4.65204e+06	4.66372e+06	0.0457933	5.14909e+06	5.5682e+06	5.08112e+06	5.26614e+06	0.0409003	3.69377e+06	3.45732e+06	3.62077e+06	3.59062e+06	0.0275319
P46777	RPL5	60S ribosomal protein L5	13	13	-0.224215	0.0294846		27.669	27.6023	27.4692	27.297	27.4129	27.3579	2.26955e+08	2.11038e+08	2.02226e+08	2.13406e+08	0.0479532	2.01702e+08	2.14087e+08	1.95474e+08	2.03754e+08	0.0379672	1.87983e+08	1.79847e+08	1.8957e+08	1.858e+08	0.0229228	1.73663e+08	1.65595e+08	1.55436e+08	1.64898e+08	0.0452238	1.87561e+08	1.77068e+08	1.71458e+08	1.78696e+08	0.0373483	1.77402e+08	1.69939e+08	1.68678e+08	1.72007e+08	0.0223829
P50416	CPT1A	Carnitine O-palmitoyltransferase 1, liver isoform	6	6	0.508874	0.0295266		22.823	22.4775	22.7776	23.2961	23.3239	22.9847	7.72303e+06	7.63299e+06	6.89147e+06	7.41583e+06	0.0502434	5.11081e+06	6.34541e+06	6.07261e+06	5.84294e+06	0.0906291	7.77758e+06	6.70989e+06	7.09058e+06	7.19268e+06	0.0614265	1.06728e+07	1.05475e+07	9.59184e+06	1.02707e+07	0.0470012	1.05695e+07	9.96402e+06	1.09848e+07	1.05061e+07	0.0398938	8.70453e+06	7.58985e+06	8.61624e+06	8.30354e+06	0.0609308
Q96K49	TMEM87B	Transmembrane protein 87B	2	2	-0.502443	0.0297935		20.9929	20.9516	20.5783	20.3971	20.4301	20.1883	1.96349e+06	2.07811e+06	2.21904e+06	2.08688e+06	0.0500811	2.02792e+06	1.85817e+06	2.1977e+06	2.02793e+06	0.0683512	1.33552e+06	2.02609e+06	1.33537e+06	1.56566e+06	0.207946	1.33726e+06	1.32653e+06	1.47855e+06	1.38078e+06	0.0501702	1.269e+06	1.35569e+06	1.61368e+06	1.41279e+06	0.103621	1.13511e+06	1.14884e+06	1.30043e+06	1.19479e+06	0.0626946
P52597	HNRNPF	Heterogeneous nuclear ribonucleoprotein F	15	13	0.236489	0.0300012		26.9316	27.0505	27.0711	27.3662	27.1795	27.217	1.25931e+08	1.3034e+08	1.2744e+08	1.27904e+08	0.0143061	1.43871e+08	1.41549e+08	1.32538e+08	1.39319e+08	0.035082	1.33027e+08	1.4852e+08	1.41773e+08	1.41107e+08	0.0449483	1.70228e+08	1.74803e+08	1.74712e+08	1.73248e+08	0.0123283	1.54663e+08	1.46325e+08	1.54713e+08	1.519e+08	0.025954	1.55459e+08	1.5432e+08	1.56914e+08	1.55564e+08	0.00682383
Q16864	ATP6V1F	V-type proton ATPase subunit F	2	2	-0.202113	0.0300473		22.1334	22.2601	22.261	21.9283	22.0704	22.0494	4.11e+06	4.65376e+06	5.0378e+06	4.60052e+06	0.0827384	4.90039e+06	4.66974e+06	5.4986e+06	5.02291e+06	0.0695399	5.41501e+06	4.44078e+06	5.22243e+06	5.02607e+06	0.0838164	4.11249e+06	3.93155e+06	3.92846e+06	3.99083e+06	0.0215583	4.38426e+06	4.31669e+06	4.51138e+06	4.40411e+06	0.0183268	4.15337e+06	4.50895e+06	4.35927e+06	4.34053e+06	0.0335836
P83731	RPL24	60S ribosomal protein L24	5	3	-0.164023	0.0302335		25.8707	25.8719	25.7444	25.7177	25.6402	25.6369	6.12766e+07	6.09521e+07	6.18336e+07	6.13541e+07	0.00593267	5.83642e+07	6.20312e+07	6.38252e+07	6.14069e+07	0.0370115	5.76971e+07	5.52665e+07	5.56735e+07	5.62124e+07	0.0189096	5.84008e+07	5.17276e+07	5.54223e+07	5.51836e+07	0.0494626	5.15857e+07	5.17146e+07	5.35878e+07	5.2296e+07	0.0174956	4.85001e+07	5.36426e+07	5.43911e+07	5.21779e+07	0.0501843
P35613	BSG	Basigin	3	3	-0.279152	0.030391		25.1569	25.2182	24.9846	24.7706	24.9335	24.8181	3.64968e+07	3.94487e+07	3.62799e+07	3.74085e+07	0.038638	3.81261e+07	3.70124e+07	4.19615e+07	3.90333e+07	0.0543085	3.3284e+07	3.32954e+07	3.30165e+07	3.31986e+07	0.0038823	2.709e+07	2.6854e+07	3.19215e+07	2.86218e+07	0.0815885	3.58778e+07	3.20293e+07	2.82198e+07	3.20423e+07	0.0975702	2.87078e+07	2.7724e+07	3.23097e+07	2.95805e+07	0.0666377
P04844	RPN2	Dolichyl-diphosphooligosaccharide--protein glycosyltransferase subunit 2	13	13	-0.290429	0.0308728		27.2474	27.124	27.0001	26.8771	26.8951	26.728	1.55836e+08	1.64163e+08	1.57977e+08	1.59326e+08	0.0221604	1.4186e+08	1.53507e+08	1.43431e+08	1.46266e+08	0.0352798	1.31138e+08	1.39647e+08	1.31898e+08	1.34228e+08	0.0286443	1.21502e+08	1.23954e+08	1.24319e+08	1.23258e+08	0.0101479	1.26005e+08	1.2983e+08	1.18592e+08	1.24809e+08	0.0373784	1.10874e+08	1.10289e+08	1.12299e+08	1.11154e+08	0.00759331
Q13642	FHL1	Four and a half LIM domains protein 1	14	13	-0.54804	0.0309903		27.6496	27.1868	27.1889	26.919	26.7733	26.6888	2.13544e+08	2.11763e+08	2.06329e+08	2.10545e+08	0.0145758	1.45424e+08	1.55329e+08	1.57561e+08	1.52771e+08	0.034524	1.49461e+08	1.52666e+08	1.56863e+08	1.52997e+08	0.0198114	1.36936e+08	1.19816e+08	1.23929e+08	1.26894e+08	0.0575058	1.19078e+08	1.13765e+08	1.11269e+08	1.14704e+08	0.0283912	1.06042e+08	1.03951e+08	1.14527e+08	1.08174e+08	0.0422759
P42765	ACAA2	3-ketoacyl-CoA thiolase, mitochondrial	25	23	0.616271	0.0310306	+	28.4354	28.3367	28.7739	29.1115	29.3745	28.9088	3.558e+08	3.70087e+08	3.62974e+08	3.62954e+08	0.0160697	3.42213e+08	3.37025e+08	3.36351e+08	3.3853e+08	0.00773658	4.43345e+08	4.63353e+08	4.70658e+08	4.59119e+08	0.0251465	5.56382e+08	5.95839e+08	5.86553e+08	5.79591e+08	0.0290609	6.55224e+08	7.29489e+08	7.03663e+08	6.96125e+08	0.0442209	4.92556e+08	4.98972e+08	5.19676e+08	5.03735e+08	0.0229737
Q96CX2	KCTD12	BTB/POZ domain-containing protein KCTD12	7	7	1.25812	0.031351	+	23.867	23.1704	24.4923	25.228	25.0401	25.0359	1.48875e+07	1.52314e+07	1.56427e+07	1.52538e+07	0.0202387	9.80514e+06	9.1707e+06	9.33455e+06	9.4368e+06	0.0284957	2.42519e+07	2.29977e+07	2.3584e+07	2.36112e+07	0.0217002	4.2212e+07	3.75811e+07	3.82248e+07	3.93393e+07	0.0520662	3.68729e+07	3.30719e+07	3.34279e+07	3.44576e+07	0.0497436	3.42025e+07	3.36306e+07	3.52184e+07	3.43505e+07	0.0191147
P42766	RPL35	60S ribosomal protein L35	4	4	-0.189291	0.0313722		25.3829	25.3632	25.271	25.2201	25.1683	25.0608	4.3819e+07	4.31833e+07	4.42586e+07	4.37536e+07	0.0100887	4.28367e+07	4.23434e+07	4.42991e+07	4.31597e+07	0.0192409	3.9784e+07	3.79315e+07	4.37473e+07	4.04876e+07	0.0599163	3.79036e+07	3.84483e+07	4.09026e+07	3.90848e+07	0.033375	3.59777e+07	3.71325e+07	4.00098e+07	3.77067e+07	0.0449641	3.2867e+07	3.63993e+07	3.57273e+07	3.49979e+07	0.0437596
Q9NZ08	ERAP1	Endoplasmic reticulum aminopeptidase 1	9	9	-0.597473	0.0314132	+	23.8145	24.0135	23.4105	23.1062	23.2456	23.0943	1.42273e+07	1.54624e+07	1.45697e+07	1.47531e+07	0.0352888	1.68862e+07	1.69723e+07	1.69459e+07	1.69348e+07	0.0021278	1.11356e+07	1.12442e+07	1.10702e+07	1.115e+07	0.00643498	9.02067e+06	9.82218e+06	8.24463e+06	9.02916e+06	0.0713313	9.70931e+06	9.48483e+06	1.06424e+07	9.94553e+06	0.0503986	8.49504e+06	8.9078e+06	9.46375e+06	8.95553e+06	0.0443203
Q01105	SET	Protein SET	3	3	0.274163	0.0317331		24.7594	24.824	24.5869	24.9271	24.9803	25.0854	2.8068e+07	2.95032e+07	2.75552e+07	2.83755e+07	0.029055	3.33533e+07	2.81373e+07	2.76186e+07	2.97031e+07	0.0871891	2.51379e+07	2.4619e+07	2.58234e+07	2.51934e+07	0.01958	2.95522e+07	3.35065e+07	3.27127e+07	3.19238e+07	0.0535029	3.45265e+07	3.18717e+07	3.30167e+07	3.31383e+07	0.0328082	3.49049e+07	3.45316e+07	3.72377e+07	3.55581e+07	0.0336753
P46063	RECQL	ATP-dependent DNA helicase Q1	4	3	0.448339	0.0318681		22.5592	22.2477	22.3211	22.953	22.6231	22.8969	5.55266e+06	6.17395e+06	6.80204e+06	6.17622e+06	0.0825845	5.24195e+06	5.07557e+06	4.60861e+06	4.97538e+06	0.0538836	5.2652e+06	4.81179e+06	5.65222e+06	5.24307e+06	0.0655072	7.91305e+06	8.40256e+06	8.03815e+06	8.11792e+06	0.0255794	6.16915e+06	6.30759e+06	6.89818e+06	6.45831e+06	0.04895	7.80464e+06	7.50943e+06	8.10721e+06	7.80709e+06	0.03126
P14314	PRKCSH	Glucosidase 2 subunit beta	6	6	-0.175191	0.0319078		27.1467	27.1748	27.0008	26.9214	26.9369	26.9383	1.54596e+08	1.46668e+08	1.44479e+08	1.48581e+08	0.0292516	1.50117e+08	1.505e+08	1.53899e+08	1.51505e+08	0.0112169	1.36534e+08	1.29079e+08	1.37261e+08	1.34291e+08	0.0275341	1.30518e+08	1.21644e+08	1.29142e+08	1.27101e+08	0.0306782	1.37075e+08	1.2939e+08	1.18968e+08	1.28478e+08	0.0577557	1.30131e+08	1.28292e+08	1.27384e+08	1.28602e+08	0.00888542
P53396	ACLY	ATP-citrate synthase	21	20	0.625534	0.0320369	+	25.48	25.48	25.019	26.1095	26.0254	25.7208	4.52067e+07	4.85125e+07	4.68187e+07	4.6846e+07	0.0288124	4.73224e+07	4.6222e+07	4.68197e+07	4.6788e+07	0.00961298	3.48141e+07	3.33917e+07	3.37017e+07	3.39692e+07	0.0179794	7.0559e+07	7.3017e+07	7.34744e+07	7.23501e+07	0.0176951	6.63713e+07	6.56306e+07	7.28272e+07	6.82764e+07	0.0473384	5.36576e+07	5.52684e+07	5.70597e+07	5.53286e+07	0.0251145
P12821	ACE	Angiotensin-converting enzyme	5	5	0.589536	0.0320506	+	22.0493	22.3239	21.9916	22.9189	22.7975	22.417	4.28438e+06	4.70384e+06	4.03227e+06	4.34016e+06	0.0638202	5.74131e+06	5.02251e+06	4.98701e+06	5.25028e+06	0.0661903	4.91657e+06	3.91975e+06	3.66641e+06	4.16758e+06	0.129481	8.36393e+06	7.69908e+06	7.71346e+06	7.92549e+06	0.0391245	8.08756e+06	7.61937e+06	6.15852e+06	7.28848e+06	0.112719	5.36198e+06	5.52877e+06	5.90965e+06	5.60014e+06	0.0409291
P06748	NPM1	Nucleophosmin	13	13	-0.238287	0.0322515		29.4956	29.5568	29.3862	29.3504	29.185	29.1883	7.43844e+08	7.56602e+08	7.70444e+08	7.56963e+08	0.0143505	8.02076e+08	7.68397e+08	7.98752e+08	7.89742e+08	0.0191885	6.80395e+08	7.13405e+08	7.11119e+08	7.0164e+08	0.0214516	6.26649e+08	6.94508e+08	7.32286e+08	6.84481e+08	0.0638519	5.60248e+08	6.21428e+08	6.49252e+08	6.10309e+08	0.060914	5.95648e+08	6.14667e+08	6.2491e+08	6.11742e+08	0.019819
P49023	PXN	Paxillin	6	6	0.498011	0.0325437		23.1534	22.8708	22.6714	23.5285	23.3101	23.3511	8.57817e+06	9.58086e+06	9.84575e+06	9.33493e+06	0.0584821	7.25871e+06	7.20422e+06	8.55811e+06	7.67368e+06	0.0815492	6.67812e+06	6.41217e+06	6.95579e+06	6.68203e+06	0.0332153	1.15294e+07	1.20496e+07	1.27855e+07	1.21215e+07	0.0425127	9.8207e+06	9.62723e+06	1.16984e+07	1.03821e+07	0.089971	9.70328e+06	1.1138e+07	1.12358e+07	1.06924e+07	0.0655166
Q8IVL6	P3H3	Prolyl 3-hydroxylase 3	12	12	-0.627365	0.0327697	+	24.9683	25.3983	24.7301	24.4111	24.4192	24.3843	3.29957e+07	3.37743e+07	3.17063e+07	3.28255e+07	0.0259792	4.49121e+07	4.47739e+07	4.29817e+07	4.42225e+07	0.0198826	2.50292e+07	3.10242e+07	2.74357e+07	2.78297e+07	0.0885118	2.00645e+07	2.45707e+07	2.22914e+07	2.23089e+07	0.0824657	1.99757e+07	2.23688e+07	2.49583e+07	2.24343e+07	0.0906943	2.03925e+07	2.19842e+07	2.33176e+07	2.18981e+07	0.0546029
Q8IWE2	FAM114A1	Protein NOXP20	9	9	-1.01861	0.0329623	+	24.8958	24.8783	24.7271	24.4288	23.393	23.6236	3.13268e+07	3.18043e+07	3.0517e+07	3.1216e+07	0.0170206	2.9966e+07	3.17152e+07	3.08405e+07	3.08406e+07	0.0231557	2.84089e+07	2.7367e+07	2.75389e+07	2.77716e+07	0.0164223	2.23544e+07	2.28065e+07	2.25917e+07	2.25842e+07	0.00817683	1.16226e+07	1.07267e+07	1.06967e+07	1.10153e+07	0.0389975	1.26879e+07	1.37442e+07	1.23407e+07	1.29243e+07	0.0461816
P09496	CLTA	Clathrin light chain A	2	2	-0.243481	0.0331472		25.1478	25.2693	25.1161	24.9733	24.8159	25.0136	4.04381e+07	3.69615e+07	3.41241e+07	3.71746e+07	0.0694589	3.92041e+07	4.1738e+07	4.03798e+07	4.04406e+07	0.0256013	3.70498e+07	3.57701e+07	3.62804e+07	3.63668e+07	0.0144633	3.51658e+07	3.03838e+07	3.32673e+07	3.2939e+07	0.0596867	3.19416e+07	2.90364e+07	2.76252e+07	2.95344e+07	0.0608449	3.18586e+07	3.4177e+07	3.55815e+07	3.38724e+07	0.0453182
P42892	ECE1	Endothelin-converting enzyme 1	11	11	0.539875	0.03326		24.6649	24.239	24.1174	24.8336	24.945	24.8623	2.51538e+07	2.67298e+07	2.79521e+07	2.66119e+07	0.0430423	2.02463e+07	1.94137e+07	1.96455e+07	1.97685e+07	0.017748	1.86594e+07	1.73834e+07	1.8465e+07	1.81692e+07	0.0308936	2.94821e+07	3.12709e+07	2.90622e+07	2.99384e+07	0.0319895	3.17766e+07	3.09081e+07	3.43116e+07	3.23321e+07	0.0446583	2.96606e+07	3.09474e+07	3.1004e+07	3.05373e+07	0.0203158
Q99470	SDF2	Stromal cell-derived factor 2	3	3	-0.272497	0.0335509		23.8621	23.6105	23.7665	23.4943	23.5383	23.3889	1.52636e+07	1.51914e+07	1.52895e+07	1.52482e+07	0.00272118	1.2076e+07	1.3237e+07	1.31089e+07	1.28073e+07	0.0405816	1.30061e+07	1.54044e+07	1.4399e+07	1.42698e+07	0.0689132	1.2067e+07	1.10671e+07	1.23166e+07	1.18169e+07	0.0456872	1.1361e+07	1.20374e+07	1.31496e+07	1.21826e+07	0.0605268	1.04711e+07	1.09768e+07	1.1504e+07	1.0984e+07	0.0383954
Q99497	PARK7	Protein DJ-1	12	11	-0.180119	0.0336808		27.4859	27.5791	27.4231	27.2606	27.3781	27.309	1.85908e+08	1.94125e+08	1.8387e+08	1.87968e+08	0.023582	2.07982e+08	1.91806e+08	2.01751e+08	2.00513e+08	0.0332241	1.81881e+08	1.76861e+08	1.8113e+08	1.79957e+08	0.0122842	1.44107e+08	1.6848e+08	1.69792e+08	1.60793e+08	0.0734535	1.62033e+08	1.71862e+08	1.89417e+08	1.74437e+08	0.064933	1.70472e+08	1.66427e+08	1.61922e+08	1.66274e+08	0.0210037
Q9UHG3	PCYOX1	Prenylcysteine oxidase 1	12	12	0.19234	0.0337252		27.1795	27.1214	27.189	27.391	27.4314	27.2445	1.51401e+08	1.54122e+08	1.51214e+08	1.52246e+08	0.0087282	1.45058e+08	1.45349e+08	1.48681e+08	1.46362e+08	0.0112287	1.4654e+08	1.5509e+08	1.56335e+08	1.52655e+08	0.0285216	1.69652e+08	1.79508e+08	1.774e+08	1.7552e+08	0.0241447	1.7989e+08	1.86158e+08	1.78222e+08	1.81423e+08	0.0188307	1.54901e+08	1.59178e+08	1.62973e+08	1.59017e+08	0.0207362
Q99747	NAPG	Gamma-soluble NSF attachment protein	3	3	-0.272748	0.0339046		21.9236	21.8306	21.8416	21.7525	21.5337	21.4913	4.39348e+06	3.59227e+06	3.94801e+06	3.97792e+06	0.0823997	3.61303e+06	4.08988e+06	3.48605e+06	3.72965e+06	0.0696947	4.14472e+06	3.62538e+06	3.50415e+06	3.75808e+06	0.0739299	3.78605e+06	3.16293e+06	3.65031e+06	3.53309e+06	0.0757264	2.95256e+06	3.22552e+06	2.92956e+06	3.03588e+06	0.0442786	2.55047e+06	3.2145e+06	3.0792e+06	2.94806e+06	0.0971855
P11182	DBT	Lipoamide acyltransferase component of branched-chain alpha-keto acid dehydrogenase complex, mitochondrial	5	5	0.341539	0.0339216		21.8073	21.895	21.8307	22.1395	22.3857	22.0325	3.52439e+06	3.86316e+06	3.62124e+06	3.6696e+06	0.0388232	4.14299e+06	3.83013e+06	3.73606e+06	3.90306e+06	0.0445664	3.68953e+06	3.47728e+06	4.03797e+06	3.73493e+06	0.0618864	4.36062e+06	4.57651e+06	4.91598e+06	4.6177e+06	0.0495027	5.31596e+06	5.92121e+06	5.19289e+06	5.47669e+06	0.0581217	3.84923e+06	4.37763e+06	4.63657e+06	4.28781e+06	0.0764135
Q9HD26	GOPC	Golgi-associated PDZ and coiled-coil motif-containing protein	2	2	0.14235	0.0340188		23.2535	23.1673	23.1095	23.3511	23.2961	23.3101	9.83227e+06	1.0326e+07	9.90297e+06	1.00204e+07	0.021756	1.20981e+07	8.26142e+06	7.9027e+06	9.42073e+06	0.201559	9.0322e+06	8.36069e+06	9.76049e+06	9.05113e+06	0.0631552	1.03708e+07	9.73292e+06	1.21011e+07	1.07349e+07	0.0932005	1.06581e+07	9.7212e+06	1.04026e+07	1.02606e+07	0.0385382	1.00832e+07	9.56721e+06	1.15085e+07	1.03863e+07	0.0790462
Q16576	RBBP7	Histone-binding protein RBBP7	4	2	0.459927	0.0340425		22.8404	22.68	22.5522	23.1348	23.3645	22.953	6.87879e+06	7.86025e+06	7.78825e+06	7.5091e+06	0.0594831	5.65623e+06	6.70286e+06	7.80306e+06	6.72072e+06	0.130423	7.69977e+06	5.25588e+06	5.48783e+06	6.14783e+06	0.179163	1.09642e+07	7.93835e+06	8.71639e+06	9.20631e+06	0.139355	1.15868e+07	1.10111e+07	9.851e+06	1.08163e+07	0.0667432	7.93988e+06	8.51587e+06	7.91771e+06	8.12449e+06	0.034082
P23786	CPT2	Carnitine O-palmitoyltransferase 2, mitochondrial	5	5	0.29695	0.0343621		21.6364	21.5404	21.4576	21.7756	21.9985	21.7512	3.22416e+06	3.11161e+06	3.44244e+06	3.2594e+06	0.0421357	2.40321e+06	3.30779e+06	3.45392e+06	3.05497e+06	0.152116	2.91183e+06	3.01866e+06	2.71183e+06	2.88077e+06	0.0441457	3.27284e+06	3.47782e+06	4.03169e+06	3.59412e+06	0.0891812	3.37443e+06	4.29551e+06	4.8858e+06	4.18525e+06	0.148598	3.5111e+06	3.19355e+06	3.8898e+06	3.53148e+06	0.0805912
P51636	CAV2	Caveolin-2	2	2	-0.895274	0.0344165	+	22.6655	23.069	22.8146	21.8078	22.4568	21.5986	6.76617e+06	6.73382e+06	6.45779e+06	6.65259e+06	0.020801	9.24296e+06	8.4758e+06	8.68003e+06	8.7996e+06	0.0368657	8.0769e+06	7.26137e+06	6.79244e+06	7.3769e+06	0.071941	3.53087e+06	3.75889e+06	3.72374e+06	3.67117e+06	0.0273036	5.35708e+06	5.51345e+06	6.39972e+06	5.75675e+06	0.0797513	2.31465e+06	3.52171e+06	3.69058e+06	3.17565e+06	0.19294
Q9UBR2	CTSZ	Cathepsin Z	5	4	-0.82674	0.0346034	+	23.9669	24.3757	24.1421	22.9582	23.2811	23.7651	1.63708e+07	1.73842e+07	1.54333e+07	1.63961e+07	0.0485865	2.38492e+07	1.93887e+07	2.20641e+07	2.17673e+07	0.0842105	1.98772e+07	1.78557e+07	1.78075e+07	1.85135e+07	0.0520964	8.20129e+06	8.01339e+06	8.23249e+06	8.14906e+06	0.0118751	1.1016e+07	1.12355e+07	8.32707e+06	1.01928e+07	0.129732	1.48288e+07	1.39327e+07	1.40077e+07	1.42564e+07	0.0284695
Q8N1F7	NUP93	Nuclear pore complex protein Nup93	3	2	0.433666	0.0346512		21.0493	21.2593	21.3805	21.4874	21.8269	21.6757	2.25412e+06	2.14609e+06	2.10426e+06	2.16816e+06	0.0291202	2.25521e+06	2.84934e+06	2.41199e+06	2.50552e+06	0.100341	2.54185e+06	2.8727e+06	2.76942e+06	2.72799e+06	0.0506636	3.03187e+06	2.76535e+06	3.01818e+06	2.93847e+06	0.0417023	3.63909e+06	3.54149e+06	3.96913e+06	3.71657e+06	0.0492327	3.20885e+06	2.99691e+06	3.83994e+06	3.34857e+06	0.106931
Q96D15	RCN3	Reticulocalbin-3	11	10	-0.573552	0.034853		27.982	28.1236	27.5225	27.3137	27.332	27.2618	2.68461e+08	2.59294e+08	2.67568e+08	2.65107e+08	0.0155673	2.96069e+08	2.90462e+08	2.90836e+08	2.92455e+08	0.00875126	1.91143e+08	1.93826e+08	1.93402e+08	1.9279e+08	0.00610709	1.67572e+08	1.64463e+08	1.6842e+08	1.66818e+08	0.0101964	1.67908e+08	1.66064e+08	1.72863e+08	1.68945e+08	0.0169913	1.51803e+08	1.63699e+08	1.67258e+08	1.6092e+08	0.041066
P08571	CD14	Monocyte differentiation antigen CD14	3	3	1.14489	0.034864	+	20.8727	20.6364	21.7013	22.3699	22.3988	21.8764	2.02107e+06	2.13934e+06	1.61096e+06	1.92379e+06	0.117691	1.7667e+06	1.43404e+06	1.6857e+06	1.62881e+06	0.0869603	3.35908e+06	3.11941e+06	3.75193e+06	3.41014e+06	0.0764588	5.59902e+06	5.59451e+06	5.07246e+06	5.422e+06	0.0455858	5.01701e+06	5.50078e+06	6.06205e+06	5.52661e+06	0.0772674	3.71429e+06	3.66427e+06	4.18037e+06	3.85298e+06	0.0603171
Q13724	MOGS	Mannosyl-oligosaccharide glucosidase	14	14	-0.290019	0.035142		25.4537	25.6204	25.3927	25.2892	25.2295	25.0781	4.5726e+07	4.62299e+07	4.59066e+07	4.59542e+07	0.00453663	5.21693e+07	5.08562e+07	5.17234e+07	5.1583e+07	0.0105696	4.28652e+07	4.57124e+07	4.35783e+07	4.4052e+07	0.0274598	4.01561e+07	4.12175e+07	4.16295e+07	4.1001e+07	0.0151378	3.82902e+07	4.11573e+07	3.85748e+07	3.93408e+07	0.0327831	3.60814e+07	3.48219e+07	3.53562e+07	3.54199e+07	0.0145727
Q9UQE7	SMC3	Structural maintenance of chromosomes protein 3	10	9	0.398234	0.0353037		23.0002	23.391	23.3645	23.6865	23.632	23.632	8.67852e+06	8.33628e+06	8.15439e+06	8.38973e+06	0.0258993	1.1359e+07	1.03378e+07	1.11558e+07	1.09508e+07	0.0403043	1.12001e+07	1.05888e+07	1.06586e+07	1.08158e+07	0.025261	1.32402e+07	1.28769e+07	1.42956e+07	1.34709e+07	0.0446681	1.31436e+07	1.30525e+07	1.28529e+07	1.30163e+07	0.00932969	1.27462e+07	1.32589e+07	1.30438e+07	1.30163e+07	0.01615
P08651	NFIC	Nuclear factor 1 C-type	3	2	0.57365	0.0357715		22.3376	22.9601	22.7013	23.3101	23.2243	23.1856	5.12496e+06	5.39455e+06	5.3779e+06	5.29914e+06	0.0232775	8.02992e+06	8.72792e+06	7.72325e+06	8.16036e+06	0.051517	6.69405e+06	6.92981e+06	6.82117e+06	6.81501e+06	0.0141377	9.29787e+06	1.04238e+07	1.1452e+07	1.03912e+07	0.0846588	7.17233e+06	9.9491e+06	1.227e+07	9.79714e+06	0.212703	9.89103e+06	9.21805e+06	9.50608e+06	9.53839e+06	0.0289037
P52272	HNRNPM	Heterogeneous nuclear ribonucleoprotein M	23	22	0.248992	0.0360772		28.2803	28.3662	28.3494	28.7325	28.5014	28.509	3.32601e+08	3.22474e+08	3.21651e+08	3.25575e+08	0.0152935	3.50844e+08	3.36835e+08	3.50432e+08	3.46037e+08	0.0188099	3.32415e+08	3.41659e+08	3.52712e+08	3.42262e+08	0.0242415	4.5142e+08	4.3963e+08	4.46689e+08	4.45913e+08	0.0108641	3.80611e+08	3.79819e+08	3.80662e+08	3.80364e+08	0.0010142	3.71098e+08	3.84624e+08	3.89545e+08	3.81756e+08	0.0204301
Q9UKM9	RALY	RNA-binding protein Raly	3	3	0.257803	0.0360919		23.7389	23.7796	23.7594	23.9584	24.1795	23.9134	1.46452e+07	1.36935e+07	1.35489e+07	1.39625e+07	0.0348281	1.35465e+07	1.44126e+07	1.51221e+07	1.43604e+07	0.0448675	1.37676e+07	1.42824e+07	1.4486e+07	1.41786e+07	0.0213224	1.72271e+07	1.58724e+07	1.58898e+07	1.63298e+07	0.0388599	1.89263e+07	1.91022e+07	1.88729e+07	1.89671e+07	0.00516329	1.65491e+07	1.56249e+07	1.53568e+07	1.58436e+07	0.0322372
Q9NW15	ANO10	Anoctamin-10	2	2	-0.405521	0.0363954		22.4593	22.505	22.2903	22.0787	22.168	21.7915	5.35094e+06	6.53608e+06	5.41317e+06	5.76673e+06	0.0944396	6.54724e+06	6.10826e+06	5.20156e+06	5.95236e+06	0.0941347	4.93427e+06	4.85025e+06	5.60297e+06	5.12916e+06	0.0656608	4.55841e+06	4.17328e+06	4.55629e+06	4.42933e+06	0.0408763	5.19819e+06	4.51548e+06	4.42295e+06	4.71221e+06	0.073365	4.31524e+06	3.42866e+06	3.14545e+06	3.62978e+06	0.137279
Q9Y3Z3	SAMHD1	Deoxynucleoside triphosphate triphosphohydrolase SAMHD1	12	11	0.995211	0.0364141	+	23.5522	23.9316	24.5345	25.2535	24.7441	25.0062	1.26042e+07	1.17386e+07	1.24392e+07	1.22607e+07	0.0306063	1.54598e+07	1.58387e+07	1.66133e+07	1.59706e+07	0.0300599	2.2992e+07	2.45908e+07	2.53916e+07	2.43248e+07	0.0410083	3.64756e+07	4.11231e+07	4.22742e+07	3.99576e+07	0.0627321	2.64092e+07	2.90992e+07	2.89274e+07	2.81453e+07	0.0436864	3.2467e+07	3.47367e+07	3.39832e+07	3.3729e+07	0.0279831
P23434	GCSH	Glycine cleavage system H protein, mitochondrial	2	2	0.474395	0.0364593		22.68	23.1363	23.0275	23.3239	23.5522	23.391	7.55089e+06	6.85565e+06	5.76636e+06	6.7243e+06	0.10922	8.73585e+06	7.89533e+06	1.10326e+07	9.22127e+06	0.143797	8.26559e+06	8.40688e+06	8.98448e+06	8.55232e+06	0.0363624	1.03009e+07	1.06287e+07	1.05004e+07	1.04767e+07	0.0128753	1.30864e+07	1.2087e+07	1.1852e+07	1.23418e+07	0.0433647	1.00031e+07	1.11409e+07	1.17369e+07	1.09603e+07	0.0656212
P27797	CALR	Calreticulin	25	25	-0.211938	0.0365063		31.0519	31.1135	30.9076	30.8082	30.8685	30.7605	2.31554e+09	2.1458e+09	2.21697e+09	2.22611e+09	0.0312639	2.3442e+09	2.27161e+09	2.35386e+09	2.32322e+09	0.015802	2.00349e+09	1.98578e+09	2.05358e+09	2.01428e+09	0.0142555	1.8338e+09	1.85675e+09	1.94987e+09	1.88014e+09	0.0266954	1.94734e+09	1.97312e+09	1.96076e+09	1.9604e+09	0.00536935	1.79755e+09	1.80212e+09	1.8572e+09	1.81896e+09	0.0149031
Q12888	TP53BP1	Tumor suppressor p53-binding protein 1	8	8	0.322881	0.0365224		22.6051	22.6606	22.3348	22.8932	22.8014	22.8746	7.14547e+06	6.06788e+06	5.9356e+06	6.38298e+06	0.0848908	6.52688e+06	7.44381e+06	5.92973e+06	6.63347e+06	0.0938724	5.2505e+06	5.08497e+06	5.52136e+06	5.28561e+06	0.0340316	8.12234e+06	7.73175e+06	7.51424e+06	7.78945e+06	0.0322982	8.26736e+06	7.20306e+06	6.4543e+06	7.30824e+06	0.10179	7.64415e+06	7.344e+06	8.08799e+06	7.69205e+06	0.0397309
P04075	ALDOA	Fructose-bisphosphate aldolase A	17	13	-0.180396	0.0366086		29.3757	29.4687	29.2763	29.2119	29.157	29.2106	7.03126e+08	6.94873e+08	6.91711e+08	6.9657e+08	0.00690818	7.20836e+08	7.44807e+08	7.63174e+08	7.42939e+08	0.0233329	6.2055e+08	6.56191e+08	6.73891e+08	6.50211e+08	0.034117	6.20405e+08	6.20709e+08	6.24326e+08	6.21814e+08	0.00286465	6.02627e+08	5.83145e+08	6.10051e+08	5.98607e+08	0.0189544	6.00123e+08	6.26449e+08	6.37133e+08	6.21235e+08	0.0250351
P36543	ATP6V1E1	V-type proton ATPase subunit E 1	3	3	-0.085467	0.0366606		24.0691	24.1174	24.1174	23.9933	23.9933	24.0609	1.76231e+07	1.80499e+07	1.71834e+07	1.76188e+07	0.0200779	2.04401e+07	1.84219e+07	1.57538e+07	1.82053e+07	0.105424	1.82477e+07	1.68014e+07	1.94829e+07	1.81773e+07	0.0602864	1.72622e+07	1.76823e+07	1.51688e+07	1.67044e+07	0.0658111	1.58077e+07	1.52163e+07	1.91916e+07	1.67386e+07	0.104627	1.69392e+07	1.93723e+07	1.62091e+07	1.75068e+07	0.0772449
Q9BWJ5	SF3B5	Splicing factor 3B subunit 5	3	3	0.268039	0.036754		23.2821	23.5285	23.5165	23.7695	23.654	23.7077	9.60175e+06	9.85025e+06	1.12567e+07	1.02362e+07	0.0711878	1.22707e+07	1.16272e+07	1.23826e+07	1.20935e+07	0.027527	1.11756e+07	1.24851e+07	1.22242e+07	1.19616e+07	0.0473116	1.38485e+07	1.49034e+07	1.42846e+07	1.43455e+07	0.0301703	1.23515e+07	1.39823e+07	1.33804e+07	1.32381e+07	0.0508643	1.38282e+07	1.26777e+07	1.47352e+07	1.3747e+07	0.0612443
Q8N428	GALNT16	Polypeptide N-acetylgalactosaminyltransferase 16	2	2	1.44173	0.0369483	+	21.1946	20.0426	20.0559	21.9495	22.2989	21.3699	1.97316e+06	2.52166e+06	2.71408e+06	2.40297e+06	0.130632	1.04175e+06	1.13547e+06	1.05164e+06	1.07628e+06	0.0390627	1.0578e+06	1.17385e+06	1.04871e+06	1.09345e+06	0.0521029	3.91602e+06	4.6105e+06	3.61352e+06	4.04668e+06	0.103139	4.9118e+06	5.80391e+06	4.75412e+06	5.15661e+06	0.0896353	2.89512e+06	2.41256e+06	2.83348e+06	2.71372e+06	0.0790191
O60711	LPXN	Leupaxin	3	3	0.776217	0.0370089	+	21.6971	20.8269	21.3045	22.0756	22.019	22.0625	3.3471e+06	3.51297e+06	3.35032e+06	3.40346e+06	0.0227551	1.71608e+06	1.75808e+06	2.11998e+06	1.86471e+06	0.0972331	2.80804e+06	2.39482e+06	2.57574e+06	2.59287e+06	0.0652297	4.54066e+06	4.84282e+06	3.86448e+06	4.41598e+06	0.0926226	4.41038e+06	4.35159e+06	3.99522e+06	4.2524e+06	0.0431349	4.37903e+06	4.45361e+06	4.30622e+06	4.37962e+06	0.0137389
Q15631	TSN	Translin	2	2	-0.339533	0.0371027		19.4481	19.3184	19.3467	18.8535	19.0304	19.2108	773852	622857	749054	715254	0.0924349	530621	821370	609231	653741	0.187841	614120	764928	621139	666729	0.104235	558565	390089	472294	473649	0.145227	517590	461390	627347	535442	0.128712	554712	662309	603261	606761	0.0725098
P00734	F2	Prothrombin	2	2	-0.863163	0.0374569	+	22.4463	21.536	21.9179	20.9274	21.2669	21.1164	5.67698e+06	5.54064e+06	5.92677e+06	5.7148e+06	0.0279784	2.90468e+06	3.15658e+06	3.06127e+06	3.04084e+06	0.0341505	4.2096e+06	4.14878e+06	3.52843e+06	3.96227e+06	0.0776762	2.0645e+06	1.85973e+06	2.0586e+06	1.99428e+06	0.047722	2.54483e+06	2.51831e+06	2.50686e+06	2.52333e+06	0.00630249	2.14439e+06	2.31918e+06	2.35647e+06	2.27335e+06	0.0406647
P21796	VDAC1	Voltage-dependent anion-selective channel protein 1	20	19	0.380007	0.0374738		28.8019	28.7676	29.0111	29.3044	29.3683	29.0479	4.77975e+08	4.65793e+08	4.61412e+08	4.68393e+08	0.0149613	4.20093e+08	4.8389e+08	4.68338e+08	4.5744e+08	0.0593759	5.29005e+08	5.30478e+08	5.62866e+08	5.40783e+08	0.0288969	6.8681e+08	6.6457e+08	6.36997e+08	6.62792e+08	0.030741	7.0616e+08	6.94138e+08	6.78077e+08	6.92792e+08	0.0166055	5.36981e+08	5.59602e+08	5.67174e+08	5.54586e+08	0.0231281
O95183	VAMP5	Vesicle-associated membrane protein 5	2	2	-0.669401	0.0377956	+	22.6675	22.0302	22.1172	21.6366	21.4315	21.7385	6.35036e+06	7.40811e+06	6.22789e+06	6.66212e+06	0.0795328	4.44559e+06	4.34612e+06	4.05705e+06	4.28292e+06	0.038478	4.64778e+06	4.23266e+06	4.76693e+06	4.54912e+06	0.0503392	3.64663e+06	3.32329e+06	2.81134e+06	3.26042e+06	0.105475	3.45274e+06	2.88359e+06	2.14855e+06	2.8283e+06	0.18876	3.25659e+06	3.79738e+06	3.44323e+06	3.49907e+06	0.0640964
Q13308	PTK7	Inactive tyrosine-protein kinase 7	24	23	-0.849543	0.0379244	+	27.4757	28.0766	27.2208	26.5897	26.6692	26.9655	1.83306e+08	1.9016e+08	1.86445e+08	1.86637e+08	0.015009	2.76188e+08	2.87889e+08	2.85152e+08	2.83076e+08	0.0176542	1.51525e+08	1.58316e+08	1.59398e+08	1.56413e+08	0.0222777	1.00091e+08	1.02136e+08	1.00759e+08	1.00995e+08	0.00842783	1.03376e+08	1.10491e+08	1.06276e+08	1.06714e+08	0.0273755	1.26308e+08	1.32805e+08	1.34036e+08	1.3105e+08	0.0258696
Q92900	UPF1	Regulator of nonsense transcripts 1	15	15	-0.238269	0.0379441		24.9032	25.1603	24.9774	24.8037	24.7742	24.7481	3.23851e+07	3.22687e+07	2.94775e+07	3.13771e+07	0.0428361	3.50202e+07	3.81337e+07	3.93372e+07	3.74971e+07	0.0485099	3.19405e+07	3.35374e+07	3.36189e+07	3.30322e+07	0.0233929	3.05449e+07	2.92791e+07	2.80356e+07	2.92866e+07	0.0349797	2.67963e+07	2.94349e+07	2.98499e+07	2.86937e+07	0.0471302	2.76762e+07	2.84147e+07	2.84439e+07	2.81783e+07	0.012605
Q8N163	CCAR2	Cell cycle and apoptosis regulator protein 2	7	7	0.408983	0.0383853		22.5708	22.7995	22.9725	23.1079	23.1379	23.3239	6.80116e+06	6.04991e+06	5.83738e+06	6.22948e+06	0.0663686	8.87059e+06	6.51008e+06	6.52717e+06	7.30261e+06	0.151829	9.5071e+06	7.37533e+06	7.79761e+06	8.22668e+06	0.112033	9.84777e+06	8.1175e+06	9.14561e+06	9.03696e+06	0.0786268	9.85274e+06	9.22518e+06	8.60646e+06	9.22812e+06	0.0551354	1.07935e+07	1.06729e+07	9.93839e+06	1.04683e+07	0.0361003
P35555	FBN1	Fibrillin-1	33	32	1.46455	0.0384934	+	25.9672	26.7771	25.275	27.4629	27.8385	27.1115	6.50172e+07	6.50454e+07	6.6701e+07	6.55879e+07	0.0120016	1.11985e+08	1.10264e+08	1.21724e+08	1.14658e+08	0.0440078	3.90458e+07	4.07342e+07	4.19168e+07	4.05656e+07	0.0290431	1.91791e+08	1.82568e+08	1.80122e+08	1.84827e+08	0.0271843	2.39794e+08	2.35479e+08	2.43868e+08	2.39714e+08	0.0142886	1.43901e+08	1.45362e+08	1.45777e+08	1.45013e+08	0.0055486
Q27J81	INF2	Inverted formin-2	7	7	0.245644	0.0387772		22.4041	22.3266	22.2821	22.7161	22.5685	22.4651	4.94901e+06	5.98111e+06	5.72592e+06	5.55201e+06	0.0790579	4.49639e+06	5.658e+06	5.63486e+06	5.26308e+06	0.103022	4.97963e+06	5.00235e+06	5.31073e+06	5.09757e+06	0.0296245	7.23194e+06	6.87488e+06	6.57212e+06	6.89298e+06	0.0391226	5.22097e+06	6.83719e+06	6.60223e+06	6.22013e+06	0.114627	4.87932e+06	6.45388e+06	6.03965e+06	5.79095e+06	0.115081
P54802	NAGLU	Alpha-N-acetylglucosaminidase	5	5	-1.16713	0.038831	+	21.7543	22.6705	22.7327	20.9886	21.0088	21.6589	3.07837e+06	3.41569e+06	4.11881e+06	3.53762e+06	0.122517	6.40084e+06	6.59524e+06	7.03177e+06	6.67595e+06	0.0395183	6.67829e+06	7.64025e+06	6.5916e+06	6.97005e+06	0.0681813	2.50563e+06	2.15018e+06	1.58594e+06	2.08058e+06	0.182002	2.48737e+06	2.17056e+06	1.67187e+06	2.10993e+06	0.159094	3.1288e+06	3.54433e+06	3.26048e+06	3.31121e+06	0.0523647
O00193	SMAP	Small acidic protein	2	2	0.437548	0.0388337		21.895	22.2302	22.1301	22.6276	22.3129	22.6276	4.15441e+06	3.84585e+06	3.71085e+06	3.9037e+06	0.047556	4.3083e+06	5.24793e+06	5.19892e+06	4.91838e+06	0.0878048	3.89814e+06	5.01471e+06	4.84335e+06	4.5854e+06	0.107073	6.83076e+06	6.00415e+06	6.60135e+06	6.47875e+06	0.0537785	6.29089e+06	4.94288e+06	4.39508e+06	5.20961e+06	0.152912	6.89233e+06	6.13163e+06	6.42845e+06	6.48414e+06	0.048278
P45973	CBX5	Chromobox protein homolog 5	6	4	0.0506337	0.0390374		23.5165	23.5285	23.5404	23.5638	23.6096	23.5638	1.21203e+07	1.22047e+07	1.16745e+07	1.19999e+07	0.0193838	1.23072e+07	1.24713e+07	1.16382e+07	1.21389e+07	0.0296836	1.22579e+07	1.23261e+07	1.21512e+07	1.22451e+07	0.00587684	1.23354e+07	1.27795e+07	1.22147e+07	1.24432e+07	0.0195197	1.4295e+07	1.23944e+07	1.18478e+07	1.28457e+07	0.0816466	1.13986e+07	1.24121e+07	1.32556e+07	1.23555e+07	0.0614437
Q8TCJ2	STT3B	Dolichyl-diphosphooligosaccharide--protein glycosyltransferase subunit STT3B	4	4	-0.339516	0.0391261		23.6349	23.3546	23.4659	23.2965	23.1001	23.0402	1.34471e+07	1.37835e+07	1.18481e+07	1.30262e+07	0.0648158	9.51277e+06	1.12897e+07	1.13759e+07	1.07261e+07	0.0800564	1.18564e+07	1.14948e+07	1.14072e+07	1.15861e+07	0.0167795	1.03081e+07	1.00169e+07	1.05832e+07	1.03027e+07	0.0224408	9.01922e+06	9.47568e+06	8.47969e+06	8.99153e+06	0.045274	8.27164e+06	8.66813e+06	8.93767e+06	8.62581e+06	0.0317123
P35241	RDX	Radixin	16	10	-0.186934	0.0392555		25.4285	25.3478	25.3079	25.276	25.1213	25.1262	4.46364e+07	4.31515e+07	4.76909e+07	4.51596e+07	0.0418464	4.42599e+07	3.92436e+07	4.46052e+07	4.27029e+07	0.057377	3.91434e+07	4.42556e+07	4.12151e+07	4.1538e+07	0.0505444	3.5059e+07	4.22333e+07	4.45967e+07	4.06296e+07	0.0998162	3.4378e+07	3.72161e+07	3.78978e+07	3.64973e+07	0.0417619	3.61519e+07	3.73533e+07	3.63582e+07	3.66211e+07	0.0143228
P20700	LMNB1	Lamin-B1	19	18	0.33448	0.0393164		26.632	26.9539	26.7771	27.1015	27.2353	27.0296	1.02323e+08	1.0541e+08	1.05649e+08	1.04461e+08	0.014502	1.28593e+08	1.35498e+08	1.26861e+08	1.30317e+08	0.0286276	1.14311e+08	1.17954e+08	1.1371e+08	1.15325e+08	0.0162562	1.44708e+08	1.41014e+08	1.47303e+08	1.44342e+08	0.0178772	1.54752e+08	1.5845e+08	1.60538e+08	1.57914e+08	0.0151486	1.35242e+08	1.39651e+08	1.35809e+08	1.36901e+08	0.0143035
P50914	RPL14	60S ribosomal protein L14	5	5	-0.206034	0.0393779		26.6308	26.7396	26.5689	26.5073	26.4635	26.3504	1.05521e+08	9.81091e+07	1.08114e+08	1.03915e+08	0.0407984	1.07858e+08	1.13121e+08	1.1517e+08	1.1205e+08	0.0274863	9.739e+07	9.79337e+07	1.03322e+08	9.95485e+07	0.0268947	9.33186e+07	9.50709e+07	9.77686e+07	9.5386e+07	0.0191884	8.59072e+07	9.70218e+07	9.46733e+07	9.25341e+07	0.0516891	7.89363e+07	8.9363e+07	8.83786e+07	8.55593e+07	0.0549374
P62891;Q59GN2	#N/A	60S ribosomal protein L39	5	5	-0.479565	0.0393786		24.4843	24.0812	24.4417	23.6948	23.8509	24.0227	2.41334e+07	2.43345e+07	2.19394e+07	2.34691e+07	0.0462214	1.74612e+07	1.63339e+07	1.94501e+07	1.77484e+07	0.0725857	2.23473e+07	2.20644e+07	2.39469e+07	2.27862e+07	0.036373	1.53868e+07	1.22479e+07	1.31008e+07	1.35785e+07	0.0975975	1.73777e+07	1.40227e+07	1.39897e+07	1.513e+07	0.10505	1.79394e+07	1.75202e+07	1.56691e+07	1.70429e+07	0.0578761
Q14697	GANAB	Neutral alpha-glucosidase AB	31	31	-0.234234	0.03969		29.2861	29.2586	29.0761	28.9517	29.0528	28.9136	6.46489e+08	6.69343e+08	6.48113e+08	6.54648e+08	0.0159043	6.35438e+08	6.43617e+08	6.47809e+08	6.42288e+08	0.0079983	5.72675e+08	5.56685e+08	5.68451e+08	5.65937e+08	0.0119547	5.12116e+08	5.28124e+08	5.17361e+08	5.192e+08	0.0128338	5.57567e+08	5.51891e+08	5.612e+08	5.56886e+08	0.00687929	4.87978e+08	5.19408e+08	5.09634e+08	5.05673e+08	0.0259721
P02786	TFRC	Transferrin receptor protein 1	8	8	-0.449256	0.0398363		24.9429	24.8092	24.5933	24.4832	24.1194	24.3951	3.29504e+07	3.29657e+07	3.08427e+07	3.22529e+07	0.0309188	2.85464e+07	2.91988e+07	3.04495e+07	2.93982e+07	0.0268596	2.46816e+07	2.53498e+07	2.59024e+07	2.53112e+07	0.0197191	2.26904e+07	2.3648e+07	2.40189e+07	2.34524e+07	0.0238644	1.82047e+07	1.80514e+07	1.84173e+07	1.82244e+07	0.00823265	2.03022e+07	2.30428e+07	2.28406e+07	2.20619e+07	0.0565235
Q9BS26	ERP44	Endoplasmic reticulum resident protein 44	12	12	-0.377649	0.0398717		26.6119	27.0335	26.7608	26.4295	26.4635	26.3802	9.67131e+07	1.03787e+08	1.07172e+08	1.02557e+08	0.0424883	1.29367e+08	1.35842e+08	1.46908e+08	1.37372e+08	0.052722	1.09608e+08	1.21732e+08	1.09787e+08	1.13709e+08	0.0498961	8.737e+07	8.98997e+07	9.38717e+07	9.03805e+07	0.0296081	8.74008e+07	9.42963e+07	9.59094e+07	9.25355e+07	0.0398765	8.29098e+07	8.96454e+07	8.9473e+07	8.73427e+07	0.0358971
P08134	RHOC	Rho-related GTP-binding protein RhoC	8	3	0.248892	0.0399616		25.2096	25.3811	25.3101	25.604	25.6264	25.417	3.60078e+07	3.82876e+07	4.22014e+07	3.88323e+07	0.0658648	4.00658e+07	4.54416e+07	4.54499e+07	4.36524e+07	0.0580986	4.12284e+07	4.08376e+07	4.27674e+07	4.16111e+07	0.020019	4.59045e+07	5.721e+07	4.99869e+07	5.10338e+07	0.0915944	4.59611e+07	5.19428e+07	5.75773e+07	5.18271e+07	0.0915156	4.6729e+07	4.19485e+07	4.57232e+07	4.48003e+07	0.0459341
P29692	EEF1D	Elongation factor 1-delta	5	5	-0.401797	0.0399647		25.7679	25.8094	25.6032	25.385	25.0969	25.4931	5.37678e+07	6.07723e+07	5.68663e+07	5.71355e+07	0.0501595	5.76915e+07	6.0467e+07	5.82522e+07	5.88036e+07	0.0203785	5.33167e+07	4.81646e+07	5.14306e+07	5.09706e+07	0.0417562	4.31758e+07	4.32402e+07	4.5037e+07	4.38176e+07	0.0196858	3.84471e+07	3.52986e+07	3.39139e+07	3.58866e+07	0.0528546	4.64459e+07	4.77765e+07	4.74585e+07	4.72269e+07	0.0120131
Q9UKK9	NUDT5	ADP-sugar pyrophosphatase	2	2	-0.379663	0.0400542		22.5455	22.5873	22.249	22.1184	22.1765	21.9479	6.80108e+06	5.87493e+06	5.6889e+06	6.12164e+06	0.0794569	6.7226e+06	6.21856e+06	5.96433e+06	6.30183e+06	0.0500037	4.85873e+06	5.13327e+06	4.96129e+06	4.98443e+06	0.0227251	4.03468e+06	3.77894e+06	5.84557e+06	4.55306e+06	0.202037	3.40721e+06	5.00399e+06	5.80936e+06	4.74019e+06	0.210595	3.87164e+06	4.08393e+06	4.18117e+06	4.04558e+06	0.0319469
P15586	GNS	N-acetylglucosamine-6-sulfatase	9	9	-0.537336	0.0401321		26.0096	26.1602	26.4136	25.5825	25.4693	25.9196	6.26346e+07	6.85153e+07	7.15174e+07	6.75558e+07	0.0546113	7.26544e+07	7.4281e+07	7.80362e+07	7.49905e+07	0.030053	8.83142e+07	9.30488e+07	8.67993e+07	8.93874e+07	0.0297783	4.61647e+07	5.24726e+07	5.20974e+07	5.02449e+07	0.057502	4.26714e+07	4.82982e+07	4.83907e+07	4.64534e+07	0.0575746	6.36053e+07	6.58225e+07	6.09836e+07	6.34705e+07	0.03116
Q9UPT5	EXOC7	Exocyst complex component 7	2	2	0.713638	0.0403589	+	19.2396	18.6971	18.9171	19.9601	19.3408	19.6937	776279	520197	560440	618972	0.181655	384532	409907	481127	425189	0.0961657	411011	628990	444070	494690	0.193896	1.05546e+06	1.2518e+06	744085	1.01712e+06	0.205523	694971	638449	659213	664211	0.0351456	894638	983770	665858	848089	0.15788
P05388	RPLP0	60S acidic ribosomal protein P0	10	10	-0.260344	0.0404982		27.8944	27.7872	27.6734	27.5462	27.6151	27.4127	2.58331e+08	2.49515e+08	2.40638e+08	2.49494e+08	0.0289511	2.24961e+08	2.34346e+08	2.35579e+08	2.31629e+08	0.0204695	2.14526e+08	2.05011e+08	2.22621e+08	2.14053e+08	0.0336212	1.94531e+08	1.87134e+08	2.06292e+08	1.95985e+08	0.0402509	2.04335e+08	1.99819e+08	2.12585e+08	2.0558e+08	0.0257108	1.77775e+08	1.8004e+08	1.78199e+08	1.78671e+08	0.00550226
Q92626	PXDN	Peroxidasin homolog	4	4	-0.957175	0.040563	+	20.8978	21.7023	20.652	20.1511	20.1949	20.0347	1.99644e+06	2.16678e+06	1.69817e+06	1.95379e+06	0.0991256	3.6098e+06	3.83558e+06	2.79122e+06	3.4122e+06	0.13149	1.30247e+06	1.94289e+06	1.69783e+06	1.64773e+06	0.160124	1.30417e+06	1.06737e+06	1.12143e+06	1.16432e+06	0.0870177	1.27149e+06	1.22588e+06	1.10333e+06	1.20023e+06	0.0591603	1.12747e+06	897051	1.19779e+06	1.0741e+06	0.119583
P83916	CBX1	Chromobox protein homolog 1	5	4	0.374691	0.0405755		22.7935	23.1765	23.0325	23.3645	23.48	23.2821	6.49582e+06	8.00551e+06	7.29928e+06	7.26687e+06	0.084872	9.19428e+06	9.82355e+06	9.43366e+06	9.48383e+06	0.0273448	9.01224e+06	9.30794e+06	7.41129e+06	8.57716e+06	0.0971403	1.15531e+07	8.83467e+06	1.19622e+07	1.07833e+07	0.128717	1.01467e+07	1.25006e+07	1.25635e+07	1.17369e+07	0.0958309	9.65818e+06	1.03254e+07	1.05113e+07	1.01649e+07	0.0360345
P24821	TNC	Tenascin	44	40	-1.54162	0.0407082	+	27.9287	29.143	27.9517	26.3869	26.5672	27.4445	2.53498e+08	2.61777e+08	2.51208e+08	2.55494e+08	0.0177688	6.04083e+08	5.98774e+08	5.75575e+08	5.92811e+08	0.020881	2.60291e+08	2.56338e+08	2.62184e+08	2.59604e+08	0.00938073	8.3444e+07	9.18641e+07	8.79455e+07	8.77512e+07	0.0392042	9.45472e+07	1.00677e+08	1.03065e+08	9.94299e+07	0.0360811	1.76656e+08	1.85972e+08	1.85318e+08	1.82648e+08	0.0232467
Q16186	ADRM1	Proteasomal ubiquitin receptor ADRM1	2	2	-0.315136	0.040791		21.6946	21.64	21.4701	21.326	21.4033	21.1299	3.96666e+06	3.41933e+06	2.79619e+06	3.39406e+06	0.140886	3.20975e+06	3.20943e+06	3.38502e+06	3.26806e+06	0.0253056	3.04887e+06	2.61427e+06	3.05167e+06	2.90494e+06	0.070754	2.57247e+06	2.32102e+06	2.99329e+06	2.62893e+06	0.105495	2.74986e+06	2.80412e+06	2.76678e+06	2.77359e+06	0.00817364	2.18861e+06	2.03365e+06	2.6619e+06	2.29472e+06	0.116454
O43181	NDUFS4	NADH dehydrogenase [ubiquinone] iron-sulfur protein 4, mitochondrial	2	2	0.231383	0.0408733		23.391	23.4676	23.5404	23.6757	23.8191	23.5983	1.10577e+07	1.01121e+07	1.18089e+07	1.09929e+07	0.0631509	1.11839e+07	1.13784e+07	1.21377e+07	1.15666e+07	0.0355786	1.2296e+07	1.13202e+07	1.28673e+07	1.21612e+07	0.0525216	1.26826e+07	1.39969e+07	1.34442e+07	1.33746e+07	0.0402852	1.30666e+07	1.4929e+07	1.65016e+07	1.48324e+07	0.0946548	1.24307e+07	1.29404e+07	1.25934e+07	1.26548e+07	0.016798
O76021	RSL1D1	Ribosomal L1 domain-containing protein 1	10	10	-0.205293	0.040927		24.8771	24.9848	25.0186	24.8395	24.7713	24.6538	3.00134e+07	2.95818e+07	3.28474e+07	3.08142e+07	0.0470055	3.1919e+07	3.37883e+07	3.38995e+07	3.32023e+07	0.0273642	3.30952e+07	3.26817e+07	3.619e+07	3.3989e+07	0.0460578	3.05125e+07	2.87551e+07	3.07953e+07	3.0021e+07	0.0300638	2.78823e+07	2.8308e+07	2.97167e+07	2.86357e+07	0.0273759	2.46651e+07	2.6565e+07	2.79556e+07	2.63953e+07	0.0510961
P49756	RBM25	RNA-binding protein 25	5	5	0.290956	0.0410061		22.6074	22.4676	22.6907	22.7816	23.0224	22.8346	6.22153e+06	6.17736e+06	6.76157e+06	6.38682e+06	0.0415861	5.63308e+06	6.09647e+06	5.6594e+06	5.79632e+06	0.0366633	6.70817e+06	6.92203e+06	6.68395e+06	6.77138e+06	0.015799	7.27689e+06	7.58018e+06	6.76488e+06	7.20732e+06	0.0466828	7.6624e+06	9.1202e+06	8.77105e+06	8.51788e+06	0.0729624	7.75494e+06	6.92063e+06	7.77665e+06	7.48407e+06	0.0532483
Q8NCA5	FAM98A	Protein FAM98A	4	4	-0.551818	0.0411446		22.7276	22.552	22.2718	22.2192	21.8871	21.7896	7.31764e+06	7.10604e+06	6.41142e+06	6.94503e+06	0.0557351	6.12589e+06	6.50839e+06	5.81382e+06	6.14937e+06	0.0461909	5.7838e+06	4.78787e+06	4.61957e+06	5.06375e+06	0.10146	5.13075e+06	4.75082e+06	4.76564e+06	4.8824e+06	0.0359882	4.1547e+06	3.6076e+06	3.87377e+06	3.87869e+06	0.0575916	3.50562e+06	3.42172e+06	3.9479e+06	3.62508e+06	0.0636743
P36578	RPL4	60S ribosomal protein L4	24	24	-0.204903	0.0412074		29.1647	29.1713	29.0099	28.9737	28.933	28.8244	6.10438e+08	6.0304e+08	5.91902e+08	6.01793e+08	0.0126598	5.86496e+08	6.08703e+08	6.1845e+08	6.0455e+08	0.0221181	5.44854e+08	5.34369e+08	5.42507e+08	5.40577e+08	0.00831084	5.32095e+08	5.13232e+08	5.36203e+08	5.27176e+08	0.0189728	5.21777e+08	5.11064e+08	5.04729e+08	5.12523e+08	0.0137283	4.58974e+08	4.87729e+08	4.79372e+08	4.75358e+08	0.0254067
Q07507	DPT	Dermatopontin	2	2	-2.02462	0.0415552	+	21.1575	23.0942	22.5326	19.6608	20.9271	20.1225	2.15667e+06	2.56084e+06	2.29949e+06	2.339e+06	0.0715483	8.35253e+06	1.02664e+07	8.24547e+06	8.95481e+06	0.103686	5.45199e+06	5.81709e+06	6.9321e+06	6.06706e+06	0.103769	589072	824605	1.07295e+06	828876	0.238354	2.25113e+06	1.91814e+06	1.81201e+06	1.99376e+06	0.09383	1.55631e+06	1.11163e+06	756648	1.14153e+06	0.286584
P62857	RPS28	40S ribosomal protein S28	3	3	-0.211008	0.0417185		26.1027	26.1129	25.9627	25.8832	25.9166	25.7454	7.44789e+07	7.13878e+07	7.03088e+07	7.20585e+07	0.0245251	7.00109e+07	7.33392e+07	7.4361e+07	7.25703e+07	0.0255927	6.53398e+07	6.6287e+07	6.45548e+07	6.53939e+07	0.0108303	6.21462e+07	6.09706e+07	6.25471e+07	6.1888e+07	0.0108098	6.27359e+07	6.28415e+07	6.44468e+07	6.33414e+07	0.0123588	5.44156e+07	5.63831e+07	5.79534e+07	5.62507e+07	0.0257296
P12259	F5	Coagulation factor V	2	2	0.424239	0.0417412		18.9316	19.2855	18.8207	19.4616	19.4736	19.3752	469267	840838	188497	499534	0.53485	967793	806185	144111	639363	0.557362	970029	175243	244584	463285	0.775847	978252	985589	203007	722283	0.508382	1.20138e+06	701588	282028	728331	0.515973	1.38532e+06	301737	354310	680456	0.73315
Q9UMS6	SYNPO2	Synaptopodin-2	4	4	-2.62578	0.0419651	+	24.0841	23.5488	21.3767	20.8185	19.7386	20.5752	1.79636e+07	1.77451e+07	1.76448e+07	1.77845e+07	0.00748406	1.1976e+07	1.16316e+07	1.32077e+07	1.22717e+07	0.0551313	2.56614e+06	2.67881e+06	2.92379e+06	2.72291e+06	0.0548331	1.83385e+06	1.89427e+06	1.81972e+06	1.84928e+06	0.0174831	811697	932859	879909	874821	0.056691	1.37518e+06	1.57515e+06	1.73635e+06	1.56223e+06	0.0945629
Q9BWM7	SFXN3	Sideroflexin-3	13	12	0.561353	0.0420166		26.0401	25.8044	26.3494	26.6181	26.8142	26.4457	6.74981e+07	6.75124e+07	7.21244e+07	6.90449e+07	0.0315373	5.80124e+07	6.01063e+07	5.75583e+07	5.8559e+07	0.0189501	8.26211e+07	8.57739e+07	8.79907e+07	8.54619e+07	0.0257799	1.05424e+08	1.00564e+08	1.0153e+08	1.02506e+08	0.0204932	1.20006e+08	1.1662e+08	1.18733e+08	1.18453e+08	0.0117883	8.97297e+07	9.45818e+07	9.00021e+07	9.14379e+07	0.024343
Q9UHL4	DPP7	Dipeptidyl peptidase 2	4	4	-0.959865	0.0420362	+	22.4768	22.7793	22.5976	21.0751	21.7498	22.1492	5.35643e+06	6.32248e+06	5.83174e+06	5.83688e+06	0.0675709	7.36576e+06	6.81514e+06	7.41489e+06	7.1986e+06	0.0377695	6.29303e+06	6.17053e+06	6.57703e+06	6.34686e+06	0.0268263	2.19189e+06	2.38028e+06	2.05531e+06	2.20916e+06	0.0603078	2.6732e+06	4.22089e+06	3.68515e+06	3.52641e+06	0.181979	4.56214e+06	4.75304e+06	4.639e+06	4.65139e+06	0.0168604
O00203	AP3B1	AP-3 complex subunit beta-1	9	9	-0.323847	0.042097		23.727	23.6781	23.4338	23.3773	23.1694	23.3207	1.33038e+07	1.30732e+07	1.52786e+07	1.38852e+07	0.071282	1.29922e+07	1.36624e+07	1.36104e+07	1.34217e+07	0.0226801	1.10923e+07	1.12533e+07	1.16476e+07	1.1331e+07	0.0205864	1.05973e+07	1.08017e+07	1.12887e+07	1.08959e+07	0.0266157	8.27202e+06	9.72496e+06	1.03043e+07	9.43378e+06	0.0906173	1.03202e+07	9.76482e+06	1.13444e+07	1.04765e+07	0.0624514
P42167	TMPO	Lamina-associated polypeptide 2, isoforms beta/gamma	14	14	0.233046	0.0421118		26.6595	26.6865	26.4892	26.8623	26.9203	26.7517	1.06035e+08	1.06345e+08	1.05148e+08	1.05843e+08	0.00479159	1.0684e+08	1.08416e+08	1.09292e+08	1.08183e+08	0.00937488	9.59196e+07	9.40523e+07	9.27684e+07	9.42468e+07	0.0137279	1.22687e+08	1.21814e+08	1.2276e+08	1.2242e+08	0.00350819	1.29451e+08	1.26009e+08	1.26939e+08	1.27466e+08	0.0114042	1.07889e+08	1.11978e+08	1.18978e+08	1.12948e+08	0.0405381
Q01831	XPC	DNA repair protein complementing XP-C cells	5	5	0.622177	0.0422373		22.7307	23.2821	23.1795	23.7492	23.867	23.4425	6.7956e+06	6.83965e+06	7.23603e+06	6.95709e+06	0.0284684	9.80915e+06	1.11371e+07	9.69256e+06	1.02129e+07	0.064156	1.0087e+07	8.88475e+06	9.5411e+06	9.50427e+06	0.0517134	1.32477e+07	1.41699e+07	1.4955e+07	1.41242e+07	0.0494	1.35941e+07	1.6834e+07	1.53759e+07	1.5268e+07	0.0867759	1.24249e+07	1.11426e+07	1.07483e+07	1.14386e+07	0.0625746
Q9UL15	BAG5	BAG family molecular chaperone regulator 5	3	2	0.534927	0.0424524		18.8787	18.6937	18.7764	19.2208	19.6558	19.0769	329269	580793	537385	482482	0.227528	262069	522017	489176	424421	0.272324	273926	661761	411936	449208	0.357321	524882	683452	624301	610878	0.107105	424987	938092	1.11526e+06	826114	0.35433	652853	366724	638437	552671	0.238145
Q9Y5P6	GMPPB	Mannose-1-phosphate guanyltransferase beta	2	2	-0.564885	0.0425778		20.6297	21.2355	20.9518	20.243	20.3601	20.5192	1.76865e+06	1.56779e+06	1.53074e+06	1.62239e+06	0.0644227	2.37994e+06	2.19522e+06	2.83164e+06	2.46893e+06	0.108277	2.20232e+06	1.98707e+06	1.8955e+06	2.0283e+06	0.0634077	1.07027e+06	1.74578e+06	906726	1.24092e+06	0.292667	1.39602e+06	1.67081e+06	970780	1.34587e+06	0.213972	1.39271e+06	1.39666e+06	1.71906e+06	1.50281e+06	0.101756
Q15582	TGFBI	Transforming growth factor-beta-induced protein ig-h3	6	5	-0.812178	0.0427789	+	23.4019	23.835	23.2362	22.2565	22.8576	22.9223	1.01029e+07	1.17726e+07	1.13744e+07	1.10833e+07	0.0642442	1.58442e+07	1.43378e+07	1.47091e+07	1.49637e+07	0.0428227	9.02924e+06	1.06e+07	1.00126e+07	9.88062e+06	0.0655837	4.46575e+06	5.02559e+06	5.54041e+06	5.01058e+06	0.0875857	7.5712e+06	8.21704e+06	7.01269e+06	7.60031e+06	0.0647481	7.85374e+06	7.9527e+06	8.03998e+06	7.9488e+06	0.00957155
Q12874	SF3A3	Splicing factor 3A subunit 3	9	9	0.364408	0.0428949		23.5285	23.5522	23.7594	23.7895	24.0105	24.1332	1.16689e+07	1.18288e+07	1.27783e+07	1.2092e+07	0.0404923	1.25836e+07	1.2217e+07	1.22371e+07	1.23459e+07	0.0136302	1.40466e+07	1.48352e+07	1.38166e+07	1.42328e+07	0.0306478	1.43149e+07	1.50723e+07	1.40303e+07	1.44725e+07	0.0303849	1.5841e+07	1.81466e+07	1.67601e+07	1.69159e+07	0.0560238	1.86262e+07	1.81355e+07	1.83414e+07	1.83677e+07	0.0109548
Q14195	DPYSL3	Dihydropyrimidinase-related protein 3	14	12	-0.67221	0.043008		26.2587	26.8195	26.1972	25.6722	25.6037	25.9828	8.257e+07	7.96183e+07	7.86754e+07	8.02879e+07	0.0206626	1.17999e+08	1.2092e+08	1.16373e+08	1.18431e+08	0.0158861	7.4238e+07	7.7791e+07	7.87909e+07	7.694e+07	0.0253921	5.41671e+07	5.0228e+07	5.60099e+07	5.34683e+07	0.0451041	5.35239e+07	5.17743e+07	4.7673e+07	5.09904e+07	0.0480895	6.12173e+07	6.80468e+07	6.96822e+07	6.63154e+07	0.0552843
P61619	SEC61A1	Protein transport protein Sec61 subunit alpha isoform 1	2	2	-0.57159	0.0431062		24.2325	24.2882	23.8248	23.7049	23.6396	23.2864	1.88745e+07	2.034e+07	1.99203e+07	1.97116e+07	0.0312615	2.36452e+07	1.96852e+07	1.81317e+07	2.04874e+07	0.1133	1.47521e+07	1.50768e+07	1.47483e+07	1.48591e+07	0.0103611	1.23953e+07	1.45203e+07	1.41057e+07	1.36737e+07	0.0672615	1.2451e+07	1.28097e+07	1.3944e+07	1.30682e+07	0.0486927	1.0233e+07	1.03943e+07	1.00642e+07	1.02305e+07	0.0131758
P24752	ACAT1	Acetyl-CoA acetyltransferase, mitochondrial	25	24	0.524593	0.0432327		28.0505	27.9316	28.2353	28.4629	28.9088	28.4194	2.71422e+08	2.7444e+08	2.8668e+08	2.77514e+08	0.0237729	2.52991e+08	2.56687e+08	2.59621e+08	2.56433e+08	0.0105789	3.12255e+08	3.09799e+08	3.24705e+08	3.15586e+08	0.0206769	3.53924e+08	3.8461e+08	3.70873e+08	3.69802e+08	0.0339376	4.7473e+08	5.03332e+08	5.33971e+08	5.04011e+08	0.0479943	3.6551e+08	3.59997e+08	3.5083e+08	3.58779e+08	0.0168755
Q9Y3D0	CIAO2B	Mitotic spindle-associated MMXD complex subunit MIP18	3	3	0.367566	0.0433214		20.2877	20.5261	20.3752	20.5823	20.7634	20.9459	1.35083e+06	1.09715e+06	1.39032e+06	1.27944e+06	0.101527	1.64873e+06	1.28004e+06	1.59424e+06	1.50767e+06	0.107775	1.12475e+06	1.40861e+06	1.55871e+06	1.36402e+06	0.131921	1.73916e+06	1.5131e+06	1.45972e+06	1.57066e+06	0.0771171	2.14306e+06	1.94795e+06	1.25022e+06	1.78041e+06	0.215272	1.94707e+06	2.16446e+06	1.95567e+06	2.0224e+06	0.0497
O60565	GREM1	Gremlin-1	4	3	-1.16276	0.0434331	+	24.8952	25.9065	26.0241	24.6348	24.0961	24.6067	2.90062e+07	3.16629e+07	3.29431e+07	3.12041e+07	0.0525465	6.12832e+07	6.54747e+07	6.19388e+07	6.28989e+07	0.0292678	6.73352e+07	6.89824e+07	6.84043e+07	6.82406e+07	0.00999923	2.63755e+07	2.45686e+07	2.72074e+07	2.60505e+07	0.0422848	1.72373e+07	1.92654e+07	1.72946e+07	1.79324e+07	0.0525771	2.39405e+07	2.54337e+07	2.72713e+07	2.55485e+07	0.0533184
Q8NBU5	ATAD1	ATPase family AAA domain-containing protein 1	2	2	-0.225599	0.0435424		21.4303	21.5631	21.4061	21.2883	21.3129	21.1215	2.65588e+06	2.74491e+06	3.07702e+06	2.82594e+06	0.0641297	3.29879e+06	2.94146e+06	3.05482e+06	3.09836e+06	0.0481204	2.77692e+06	3.0647e+06	2.49536e+06	2.77899e+06	0.08364	2.62777e+06	2.65155e+06	2.40395e+06	2.56109e+06	0.0435514	3.14459e+06	2.61587e+06	2.05491e+06	2.60512e+06	0.170788	2.25185e+06	2.29792e+06	2.29428e+06	2.28135e+06	0.00916616
Q15637	SF1	Splicing factor 1	5	5	0.314515	0.0435821		24.417	24.6595	24.417	24.8997	24.6703	24.867	2.25671e+07	2.1198e+07	2.35791e+07	2.24481e+07	0.0434673	2.75387e+07	2.59832e+07	2.60397e+07	2.65205e+07	0.0271609	2.13457e+07	2.24043e+07	2.35714e+07	2.24405e+07	0.0405078	2.8591e+07	3.2236e+07	3.30753e+07	3.13008e+07	0.0621861	2.38559e+07	2.8142e+07	2.80177e+07	2.66719e+07	0.0746789	2.84228e+07	3.06786e+07	3.2587e+07	3.05628e+07	0.0556891
Q12765	SCRN1	Secernin-1	3	3	-0.184551	0.0436971		23.3653	23.3457	23.4644	23.1795	23.3074	23.1348	1.05089e+07	1.14418e+07	1.04656e+07	1.08054e+07	0.0416788	1.02348e+07	1.09884e+07	1.0756e+07	1.06597e+07	0.0295596	1.23334e+07	1.05388e+07	1.18496e+07	1.15739e+07	0.0655012	9.6127e+06	9.55942e+06	9.32716e+06	9.49976e+06	0.01305	1.14398e+07	1.01754e+07	9.52595e+06	1.03804e+07	0.0765531	9.45856e+06	9.70129e+06	8.47114e+06	9.21033e+06	0.0577608
P09874	PARP1	Poly [ADP-ribose] polymerase 1	16	16	0.206912	0.0437319		25.3745	25.604	25.5522	25.7208	25.7415	25.6891	4.28047e+07	4.47379e+07	4.2845e+07	4.34625e+07	0.0207526	5.00435e+07	4.99358e+07	5.29939e+07	5.09911e+07	0.0277875	4.72403e+07	5.11681e+07	4.92189e+07	4.92091e+07	0.0325857	5.48038e+07	5.45158e+07	5.66151e+07	5.53115e+07	0.0167993	5.22746e+07	5.93491e+07	5.6791e+07	5.61383e+07	0.0521	5.29547e+07	5.24847e+07	5.69191e+07	5.41195e+07	0.0367499
Q9UBG0	MRC2	C-type mannose receptor 2	30	30	-0.164724	0.0437453		28.5025	28.6091	28.5532	28.3415	28.4853	28.3439	3.82704e+08	3.8376e+08	3.74405e+08	3.8029e+08	0.0110006	4.08975e+08	4.08132e+08	4.11228e+08	4.09445e+08	0.00319172	3.95965e+08	3.98873e+08	3.86849e+08	3.93896e+08	0.0130041	3.31075e+08	3.398e+08	3.49473e+08	3.40116e+08	0.022094	3.59508e+08	3.86358e+08	3.81468e+08	3.75778e+08	0.0310727	3.37619e+08	3.29699e+08	3.54782e+08	3.407e+08	0.030729
Q6NUK1	SLC25A24	Calcium-binding mitochondrial carrier protein SCaMC-1	8	8	0.387826	0.0437555		25.3376	25.3877	25.2607	25.7492	25.9203	25.48	4.07324e+07	4.4458e+07	4.19732e+07	4.23879e+07	0.0365434	4.68168e+07	4.25008e+07	4.24709e+07	4.39295e+07	0.0464756	3.92386e+07	3.92514e+07	4.1982e+07	4.01573e+07	0.032129	5.08715e+07	5.96574e+07	5.85465e+07	5.63585e+07	0.0693112	6.50314e+07	5.79339e+07	6.75506e+07	6.35053e+07	0.0641143	4.66359e+07	4.97247e+07	4.4168e+07	4.68429e+07	0.0485293
O15075	DCLK1	Serine/threonine-protein kinase DCLK1	3	3	1.38046	0.0437845	+	21.8385	20.4273	21.3321	22.8346	22.1111	22.7935	3.31081e+06	3.86355e+06	4.08796e+06	3.75411e+06	0.0869902	1.15404e+06	1.52916e+06	1.5355e+06	1.40623e+06	0.126826	2.49423e+06	2.75645e+06	2.6668e+06	2.63916e+06	0.041234	7.60036e+06	6.86702e+06	7.98141e+06	7.48293e+06	0.0618027	4.0347e+06	4.71663e+06	4.82491e+06	4.52541e+06	0.0772949	6.77077e+06	7.68566e+06	7.35252e+06	7.26965e+06	0.0520066
Q9NSE4	IARS2	Isoleucine--tRNA ligase, mitochondrial	21	20	0.493597	0.0438235		25.228	25.2535	25.275	25.6486	26.0752	25.5135	3.8408e+07	3.99356e+07	3.96582e+07	3.93339e+07	0.0168928	3.96632e+07	3.99754e+07	4.02438e+07	3.99608e+07	0.0059377	4.09081e+07	3.95741e+07	4.13857e+07	4.06226e+07	0.018872	5.21632e+07	5.29259e+07	5.28577e+07	5.26489e+07	0.00654533	6.85741e+07	7.02609e+07	7.32204e+07	7.06851e+07	0.0271682	4.7922e+07	4.70496e+07	4.86366e+07	4.78694e+07	0.0135566
Q9H2K8	TAOK3	Serine/threonine-protein kinase TAO3	3	3	-0.202977	0.0445053		20.2015	20.1626	20.0975	19.8681	20.0753	19.9093	1.32973e+06	1.19459e+06	1.09295e+06	1.20576e+06	0.0804382	1.30285e+06	1.15517e+06	1.06311e+06	1.17371e+06	0.0841346	1.21827e+06	1.09289e+06	1.05449e+06	1.12188e+06	0.0623372	981638	988314	900951	956968	0.0414886	1.36561e+06	937878	1.01069e+06	1.10473e+06	0.169139	1.11817e+06	939396	896570	984712	0.0974648
P26641	EEF1G	Elongation factor 1-gamma	11	11	-0.447568	0.0447627		27.3313	27.2639	27.1099	26.8071	26.5347	27.0205	1.69594e+08	1.67868e+08	1.6914e+08	1.68868e+08	0.00432796	1.53166e+08	1.63768e+08	1.66528e+08	1.61154e+08	0.0357391	1.46311e+08	1.42561e+08	1.4565e+08	1.44841e+08	0.0112855	1.21482e+08	1.12324e+08	1.18461e+08	1.17422e+08	0.0324474	9.98856e+07	9.68732e+07	9.48945e+07	9.72178e+07	0.0211086	1.32891e+08	1.37611e+08	1.37921e+08	1.36141e+08	0.016906
P02545	LMNA	Prelamin-A/C	56	55	0.353351	0.0448351		31.2703	31.6154	31.5664	31.901	31.8901	31.7211	2.71152e+09	2.54764e+09	2.50766e+09	2.58894e+09	0.0340686	3.35846e+09	3.31461e+09	3.18388e+09	3.28565e+09	0.0225698	3.23709e+09	3.14404e+09	3.16355e+09	3.18156e+09	0.0125936	4.12222e+09	4.01566e+09	3.88358e+09	4.00715e+09	0.0243586	4.16235e+09	3.89472e+09	3.87725e+09	3.97811e+09	0.0327986	3.47696e+09	3.59222e+09	3.53811e+09	3.53576e+09	0.0133163
Q9P2R7	SUCLA2	Succinyl-CoA ligase [ADP-forming] subunit beta, mitochondrial	6	6	0.527986	0.0449927		23.9406	23.6971	23.867	24.4041	24.632	24.0526	1.55002e+07	1.6223e+07	1.65619e+07	1.6095e+07	0.02751	1.32643e+07	1.29855e+07	1.4523e+07	1.35909e+07	0.0492113	1.49511e+07	1.67127e+07	1.43049e+07	1.53229e+07	0.0664074	1.99979e+07	2.25822e+07	2.39007e+07	2.21603e+07	0.0731504	2.33263e+07	2.67519e+07	2.80346e+07	2.60376e+07	0.0763288	1.72807e+07	1.70329e+07	1.77868e+07	1.73668e+07	0.0180657
Q9Y2R5	MRPS17	28S ribosomal protein S17, mitochondrial	2	2	0.359186	0.0450205		22.6757	22.417	22.7655	22.9985	23.0854	22.8519	7.57393e+06	5.8271e+06	6.69977e+06	6.70026e+06	0.106434	4.99788e+06	5.78682e+06	6.02119e+06	5.60196e+06	0.0781393	6.92674e+06	7.41625e+06	7.05799e+06	7.13366e+06	0.0290006	9.56889e+06	7.07418e+06	8.50761e+06	8.38356e+06	0.121933	9.18602e+06	8.65945e+06	8.85755e+06	8.90101e+06	0.0243965	7.00143e+06	8.06636e+06	7.64999e+06	7.57259e+06	0.0578649
O75438	NDUFB1	NADH dehydrogenase [ubiquinone] 1 beta subcomplex subunit 1	4	4	0.203854	0.0450314		21.0088	21.1642	20.9672	21.2989	21.2764	21.1765	1.97019e+06	2.29867e+06	2.07512e+06	2.11466e+06	0.0647785	2.23294e+06	2.22939e+06	2.59796e+06	2.35343e+06	0.0734724	2.44168e+06	2.02129e+06	1.69942e+06	2.05413e+06	0.147954	2.26289e+06	2.54186e+06	2.9428e+06	2.58252e+06	0.108056	2.31995e+06	2.75118e+06	2.55188e+06	2.54101e+06	0.06935	2.21765e+06	2.57632e+06	2.30533e+06	2.36643e+06	0.0645131
P16104;Q8IUE6;Q96QV6	#N/A	Histone H2AX	11	3	0.489036	0.0450509		27.9595	28.4314	28.267	28.6798	28.8916	28.5536	2.42652e+08	2.69581e+08	2.70737e+08	2.6099e+08	0.0497164	3.8106e+08	3.31911e+08	3.73706e+08	3.62226e+08	0.0597563	3.06328e+08	3.39526e+08	3.24628e+08	3.23494e+08	0.0419697	3.55781e+08	4.56024e+08	4.7676e+08	4.29522e+08	0.122987	4.36594e+08	5.20812e+08	5.3543e+08	4.97612e+08	0.0875321	4.10201e+08	3.6141e+08	4.11257e+08	3.94289e+08	0.0589748
P26038	MSN	Moesin	24	19	-0.178459	0.045149		28.6462	28.6747	28.5942	28.5745	28.3976	28.4076	3.96348e+08	4.28304e+08	4.35663e+08	4.20105e+08	0.040621	4.27056e+08	4.14835e+08	4.43608e+08	4.285e+08	0.0275163	3.88992e+08	4.17345e+08	4.09376e+08	4.05238e+08	0.0294622	3.73814e+08	4.08131e+08	4.17295e+08	3.99747e+08	0.0468161	3.20457e+08	3.62312e+08	3.7808e+08	3.53616e+08	0.0687604	3.51719e+08	3.41693e+08	3.74802e+08	3.56071e+08	0.0389325
Q13488	TCIRG1	V-type proton ATPase 116 kDa subunit a isoform 3	7	7	-0.23215	0.0451581		23.8671	23.9162	24.0973	23.6773	23.8074	23.6995	1.42447e+07	1.57478e+07	1.59112e+07	1.53012e+07	0.0490186	1.64149e+07	1.58553e+07	1.52207e+07	1.58303e+07	0.0308188	1.82777e+07	1.68637e+07	1.87008e+07	1.79474e+07	0.0437659	1.27091e+07	1.36122e+07	1.39224e+07	1.34146e+07	0.0383652	1.45962e+07	1.58729e+07	1.3572e+07	1.46804e+07	0.0641138	1.47131e+07	1.38489e+07	1.23048e+07	1.36223e+07	0.0731292
Q14683	SMC1A	Structural maintenance of chromosomes protein 1A	7	7	0.359386	0.0453708		22.695	22.9864	23.1111	23.2961	23.3239	23.2506	7.10844e+06	7.06426e+06	6.19504e+06	6.78925e+06	0.0619442	7.81193e+06	8.51998e+06	8.59955e+06	8.31049e+06	0.0425997	9.05758e+06	8.72083e+06	9.4109e+06	9.0631e+06	0.0310871	1.03972e+07	1.03239e+07	1.01897e+07	1.03036e+07	0.0083365	9.32664e+06	1.14e+07	1.08297e+07	1.05188e+07	0.0831401	9.54698e+06	9.88547e+06	1.05062e+07	9.97955e+06	0.0398019
P13010	XRCC5	X-ray repair cross-complementing protein 5	36	36	0.30653	0.0455597		27.3662	27.6458	27.3745	27.7708	27.673	27.8623	1.70996e+08	1.73521e+08	1.74191e+08	1.72903e+08	0.00795597	2.17305e+08	2.01784e+08	2.09863e+08	2.09651e+08	0.0302307	1.74556e+08	1.71856e+08	1.7496e+08	1.73791e+08	0.00793043	2.11473e+08	2.40467e+08	2.33866e+08	2.28602e+08	0.0542791	2.03434e+08	2.20023e+08	2.19129e+08	2.14195e+08	0.0355673	2.48892e+08	2.39115e+08	2.42885e+08	2.43631e+08	0.0165252
P41567	EIF1	Eukaryotic translation initiation factor 1	6	2	-0.583241	0.0456003		21.724	22.04	21.3554	21.1056	21.2128	21.0513	3.261e+06	3.52286e+06	3.60803e+06	3.46396e+06	0.0426292	4.00619e+06	4.29517e+06	4.63516e+06	4.31217e+06	0.0596121	2.70662e+06	2.70549e+06	2.63697e+06	2.68303e+06	0.0121397	1.66697e+06	2.66266e+06	2.43949e+06	2.25638e+06	0.189071	2.1863e+06	2.27893e+06	2.82633e+06	2.43052e+06	0.116197	1.74417e+06	2.48855e+06	2.28635e+06	2.17302e+06	0.144628
O00154	ACOT7	Cytosolic acyl coenzyme A thioester hydrolase	3	3	0.906184	0.0456136	+	21.3538	20.7955	20.4273	21.8269	22.0156	21.4526	2.51097e+06	2.48481e+06	3.03463e+06	2.6768e+06	0.0946072	2.03467e+06	1.71077e+06	1.72221e+06	1.82255e+06	0.0823371	1.4625e+06	1.46981e+06	1.29747e+06	1.40993e+06	0.0564387	3.62523e+06	3.61038e+06	3.91959e+06	3.7184e+06	0.0382936	4.43224e+06	3.72989e+06	4.56466e+06	4.24226e+06	0.086348	2.73785e+06	2.87801e+06	2.98685e+06	2.86757e+06	0.0355437
P84243;Q71DI3	#N/A	Histone H3.3	10	2	0.333188	0.0460262		23.1269	23.3376	23.3239	23.632	23.7389	23.417	9.7001e+06	8.93361e+06	8.84146e+06	9.15839e+06	0.0420262	1.11226e+07	1.06457e+07	9.93884e+06	1.0569e+07	0.0460114	9.09889e+06	1.07458e+07	1.17299e+07	1.05248e+07	0.103126	1.08361e+07	1.51835e+07	1.30937e+07	1.30377e+07	0.136163	1.28564e+07	1.38207e+07	1.54575e+07	1.40449e+07	0.0764437	1.11123e+07	1.0126e+07	1.24223e+07	1.12202e+07	0.0838258
P82673	MRPS35	28S ribosomal protein S35, mitochondrial	3	3	0.352943	0.0462778		22.9441	22.7634	22.9006	23.3778	23.2821	23.0071	7.88219e+06	8.72539e+06	7.60517e+06	8.07092e+06	0.0590269	6.18916e+06	7.61398e+06	7.56569e+06	7.12294e+06	0.0927391	6.57812e+06	8.16273e+06	8.73846e+06	7.82644e+06	0.116713	8.06336e+06	1.14783e+07	1.32998e+07	1.09471e+07	0.198271	9.23807e+06	9.5051e+06	1.17295e+07	1.01576e+07	0.109956	7.90019e+06	9.77703e+06	7.60664e+06	8.42795e+06	0.114078
P17931	LGALS3	Galectin-3	11	10	-0.254808	0.0463529		28.0686	27.9774	28.146	27.8221	27.9321	27.6735	3.04588e+08	2.75883e+08	2.64065e+08	2.81512e+08	0.0604432	2.56768e+08	2.71434e+08	2.646e+08	2.64268e+08	0.0226732	2.97649e+08	2.87356e+08	3.06085e+08	2.9703e+08	0.0257843	2.48834e+08	2.3903e+08	2.24022e+08	2.37296e+08	0.042999	2.74604e+08	2.50407e+08	2.43255e+08	2.56089e+08	0.0523801	2.08221e+08	2.18093e+08	2.15883e+08	2.14066e+08	0.0197619
O15382	BCAT2	Branched-chain-amino-acid aminotransferase, mitochondrial	6	6	0.570775	0.0465302		22.0723	22.2419	22.2905	22.5662	23.1504	22.6006	4.13499e+06	4.83083e+06	4.26549e+06	4.41044e+06	0.0684739	5.49117e+06	4.39353e+06	5.00937e+06	4.96469e+06	0.0904834	4.91232e+06	5.37621e+06	5.10755e+06	5.13203e+06	0.0370552	6.41749e+06	6.07086e+06	6.13429e+06	6.20754e+06	0.0242763	9.76029e+06	8.40204e+06	9.7605e+06	9.30761e+06	0.068797	6.30853e+06	6.25671e+06	6.5179e+06	6.36104e+06	0.0177504
O75569	PRKRA	Interferon-inducible double-stranded RNA-dependent protein kinase activator A	5	5	-0.312143	0.0467367		23.7952	23.9741	23.7856	23.6226	23.6383	23.3575	1.30285e+07	1.58147e+07	1.48262e+07	1.45564e+07	0.0792313	1.51523e+07	1.67312e+07	1.75516e+07	1.64783e+07	0.0604248	1.49861e+07	1.44335e+07	1.39609e+07	1.44602e+07	0.0289735	1.14246e+07	1.3423e+07	1.38986e+07	1.29154e+07	0.0829961	9.65563e+06	1.50648e+07	1.44502e+07	1.30569e+07	0.185197	1.07002e+07	1.01938e+07	1.13481e+07	1.07474e+07	0.0439568
Q5ZPR3	CD276	CD276 antigen	4	4	0.580448	0.0469035		25.3239	24.7077	24.824	25.6403	25.5754	25.3811	4.02489e+07	4.15066e+07	4.41443e+07	4.19666e+07	0.0386789	2.87333e+07	2.7162e+07	2.63019e+07	2.73991e+07	0.03674	2.91934e+07	2.74807e+07	3.2284e+07	2.96527e+07	0.0670321	5.20608e+07	5.18922e+07	5.30205e+07	5.23245e+07	0.00949686	5.06671e+07	4.92072e+07	5.00925e+07	4.99889e+07	0.0120128	4.40377e+07	4.26803e+07	4.43393e+07	4.36858e+07	0.0165177
P04843	RPN1	Dolichyl-diphosphooligosaccharide--protein glycosyltransferase subunit 1	23	22	-0.184269	0.0470589		28.4924	28.4756	28.3492	28.2832	28.3177	28.1635	3.70583e+08	3.79451e+08	3.82844e+08	3.77626e+08	0.0136886	3.72425e+08	3.75294e+08	3.72052e+08	3.73257e+08	0.00388096	3.41203e+08	3.44051e+08	3.40614e+08	3.41956e+08	0.00438935	3.25472e+08	3.30848e+08	3.2365e+08	3.26657e+08	0.00935418	3.30337e+08	3.32319e+08	3.41001e+08	3.34552e+08	0.0138426	2.89165e+08	3.04134e+08	3.08676e+08	3.00658e+08	0.0277258
O43819	SCO2	Protein SCO2 homolog, mitochondrial	2	2	1.12975	0.0470607	+	20.0426	20.9812	21.1581	22.0526	22.0559	21.4626	644445	1.21846e+06	1.38615e+06	1.08302e+06	0.29324	1.90382e+06	2.04918e+06	2.24245e+06	2.06515e+06	0.0671651	2.03358e+06	2.58204e+06	2.39491e+06	2.33684e+06	0.0974145	3.77556e+06	5.21466e+06	4.0567e+06	4.34897e+06	0.143206	3.80295e+06	4.75291e+06	4.52615e+06	4.36067e+06	0.0928949	3.70228e+06	2.83734e+06	2.13209e+06	2.89057e+06	0.222147
P35637	FUS	RNA-binding protein FUS	4	4	-0.162899	0.0470872		25.2223	25.1877	25.2686	25.0494	24.9802	25.1604	4.13274e+07	3.98448e+07	3.62642e+07	3.91455e+07	0.0542944	3.4882e+07	4.1306e+07	3.84656e+07	3.82178e+07	0.0687747	3.98236e+07	4.20085e+07	3.94286e+07	4.04202e+07	0.0280697	3.70203e+07	3.20369e+07	3.51121e+07	3.47231e+07	0.0591244	3.22242e+07	3.36356e+07	3.34326e+07	3.30975e+07	0.0188234	3.6973e+07	3.78563e+07	3.76679e+07	3.74991e+07	0.0101302
O75347	TBCA	Tubulin-specific chaperone A	2	2	-0.307187	0.0473171		23.7243	23.7932	23.7066	23.2436	23.607	23.4519	1.42427e+07	1.3944e+07	1.33899e+07	1.38589e+07	0.0254931	1.50997e+07	1.41367e+07	1.43724e+07	1.45363e+07	0.0281951	1.46807e+07	1.32811e+07	1.31081e+07	1.36899e+07	0.0514314	1.07402e+07	9.22282e+06	9.83289e+06	9.93195e+06	0.0627671	1.44808e+07	1.17843e+07	1.20649e+07	1.27767e+07	0.094738	1.14687e+07	1.1006e+07	1.19472e+07	1.1474e+07	0.0334871
P55899	FCGRT	IgG receptor FcRn large subunit p51	6	6	0.441043	0.0473318		23.9043	24.3778	24.1095	24.48	24.7182	24.5165	1.58706e+07	1.54916e+07	1.56252e+07	1.56625e+07	0.0100226	2.11259e+07	2.1832e+07	2.23936e+07	2.17839e+07	0.0238089	1.73479e+07	1.87276e+07	1.81515e+07	1.80757e+07	0.0313021	2.22535e+07	2.37026e+07	2.43198e+07	2.34253e+07	0.03697	2.60926e+07	2.55241e+07	3.12629e+07	2.76265e+07	0.0934521	2.49889e+07	2.39479e+07	2.30924e+07	2.40097e+07	0.0322996
Q9P299	COPZ2	Coatomer subunit zeta-2	2	2	-0.448175	0.0473829		22.1667	22.2289	21.8405	21.8236	21.4723	21.5957	4.89432e+06	4.90319e+06	4.32655e+06	4.70802e+06	0.0572991	4.44825e+06	4.81676e+06	5.48147e+06	4.91549e+06	0.0869801	3.5888e+06	3.89277e+06	3.78441e+06	3.75533e+06	0.0334949	3.99214e+06	3.70101e+06	3.44135e+06	3.7115e+06	0.0606177	2.56351e+06	2.63125e+06	3.5333e+06	2.90935e+06	0.151945	2.35484e+06	3.72099e+06	3.43208e+06	3.1693e+06	0.185487
O94925	GLS	Glutaminase kidney isoform, mitochondrial	17	16	-0.660961	0.0474749		26.3392	26.5228	25.834	25.4509	25.7921	25.4701	8.54154e+07	8.36834e+07	8.55951e+07	8.4898e+07	0.0101529	9.63642e+07	9.71971e+07	9.56854e+07	9.64156e+07	0.00641203	5.97095e+07	5.99236e+07	5.98136e+07	5.98156e+07	0.00146108	4.53221e+07	4.51941e+07	4.70834e+07	4.58666e+07	0.0187948	5.53032e+07	5.8311e+07	6.06933e+07	5.81025e+07	0.0379571	4.6187e+07	4.62847e+07	4.69665e+07	4.64794e+07	0.00746015
P37802	TAGLN2	Transgelin-2	14	14	-0.322375	0.0476717		29.3283	29.6403	29.3227	29.1074	29.1863	29.0305	6.61655e+08	6.76886e+08	6.83617e+08	6.74052e+08	0.0136297	8.35703e+08	8.14923e+08	8.5975e+08	8.36792e+08	0.0218894	6.44353e+08	6.80711e+08	6.8927e+08	6.71445e+08	0.0290013	5.31495e+08	5.98168e+08	6.05395e+08	5.78353e+08	0.0575156	5.43565e+08	6.37206e+08	6.51881e+08	6.10884e+08	0.0785374	5.3867e+08	5.45267e+08	5.61033e+08	5.48323e+08	0.0171102
O95372	LYPLA2	Acyl-protein thioesterase 2	2	2	-0.188676	0.0477049		20.9084	21.0786	20.9233	20.7083	20.7954	20.8405	2.1941e+06	2.07648e+06	1.63368e+06	1.96809e+06	0.122601	2.35158e+06	2.48379e+06	1.80854e+06	2.21463e+06	0.131933	2.01678e+06	1.77794e+06	2.17087e+06	1.98853e+06	0.0812938	1.63113e+06	1.50984e+06	1.9989e+06	1.71329e+06	0.121368	2.14849e+06	1.65628e+06	1.65495e+06	1.81991e+06	0.127668	1.78125e+06	2.00887e+06	1.84274e+06	1.87762e+06	0.0512049
O60684	KPNA6	Importin subunit alpha-7	3	3	0.354441	0.048063		21.6971	21.4626	21.391	22.0224	21.8651	21.7265	2.93058e+06	3.50756e+06	3.77265e+06	3.40359e+06	0.103287	3.45064e+06	2.60261e+06	2.6172e+06	2.89015e+06	0.137147	2.60757e+06	2.74734e+06	2.90213e+06	2.75235e+06	0.043711	3.67988e+06	4.49771e+06	4.616e+06	4.26453e+06	0.0976002	3.2239e+06	4.31433e+06	3.92048e+06	3.81957e+06	0.118036	3.51017e+06	3.34823e+06	3.54236e+06	3.46692e+06	0.0245027
P21399	ACO1	Cytoplasmic aconitate hydratase	11	11	-0.607166	0.0480745		23.6653	23.8498	23.9799	23.3403	22.8433	23.4899	1.25495e+07	1.33816e+07	1.39804e+07	1.33039e+07	0.0441048	1.39371e+07	1.53184e+07	1.60985e+07	1.5118e+07	0.0591143	1.49068e+07	1.76938e+07	1.70358e+07	1.65454e+07	0.0718895	8.541e+06	1.14444e+07	1.1876e+07	1.06205e+07	0.139441	6.16236e+06	8.05624e+06	8.35699e+06	7.5252e+06	0.129094	1.11218e+07	1.17654e+07	1.24543e+07	1.17805e+07	0.0461851
O43707	ACTN4	Alpha-actinin-4	63	41	-0.771963	0.0480937		30.0506	29.8124	29.1412	28.8828	28.8467	28.9587	1.13584e+09	1.10865e+09	1.09183e+09	1.11211e+09	0.0163035	8.95632e+08	9.75451e+08	9.57309e+08	9.42797e+08	0.0362365	5.78971e+08	5.90535e+08	6.06661e+08	5.92056e+08	0.0191798	4.92091e+08	4.95171e+08	4.97723e+08	4.94995e+08	0.00465149	4.77083e+08	4.84512e+08	4.86675e+08	4.82757e+08	0.00850935	5.12751e+08	5.20372e+08	5.32072e+08	5.21732e+08	0.0152304
Q9NR31	SAR1A	GTP-binding protein SAR1a	9	6	-0.268712	0.0482466		25.4363	25.6787	25.4843	25.3849	25.1977	25.2106	4.2104e+07	4.51559e+07	4.89531e+07	4.54043e+07	0.0617038	5.18856e+07	5.3467e+07	5.57744e+07	5.3709e+07	0.0297302	4.57053e+07	4.50011e+07	5.01148e+07	4.69404e+07	0.0482099	4.01448e+07	4.55588e+07	4.57428e+07	4.38155e+07	0.0592633	3.46538e+07	4.20099e+07	3.87829e+07	3.84822e+07	0.0782344	3.94917e+07	3.83791e+07	3.86096e+07	3.88268e+07	0.0123493
O75937	DNAJC8	DnaJ homolog subfamily C member 8	5	5	0.27586	0.0482685		22.9847	23.0443	22.7776	23.1174	23.2066	23.3101	9.42591e+06	7.48025e+06	8.00619e+06	8.30411e+06	0.0989599	7.96531e+06	8.53224e+06	9.44533e+06	8.64762e+06	0.0705049	7.16867e+06	6.94336e+06	7.46072e+06	7.19092e+06	0.0294533	9.66456e+06	7.78651e+06	9.84249e+06	9.09785e+06	0.102233	9.01386e+06	8.81142e+06	1.12068e+07	9.67735e+06	0.112077	1.07394e+07	9.89581e+06	1.06689e+07	1.04347e+07	0.0366229
Q16643	DBN1	Drebrin	15	15	0.805884	0.0485324	+	26.1194	25.4362	25.6918	26.9539	26.4504	26.2607	7.55867e+07	7.23286e+07	7.07448e+07	7.28867e+07	0.0276551	4.56109e+07	4.50011e+07	4.5606e+07	4.5406e+07	0.00630516	5.40424e+07	5.47366e+07	5.38057e+07	5.41949e+07	0.00728925	1.27197e+08	1.29546e+08	1.32614e+08	1.29786e+08	0.0170885	9.08483e+07	8.95048e+07	9.46393e+07	9.16642e+07	0.0237178	8.09192e+07	8.00428e+07	8.01511e+07	8.0371e+07	0.00485433
Q9H788	SH2D4A	SH2 domain-containing protein 4A	4	4	-0.956065	0.0485565	+	19.9509	19.3328	19.588	18.6624	18.1686	19.1726	1.18831e+06	916348	935774	1.01348e+06	0.122234	806231	626426	548314	660323	0.163538	841291	911049	611993	788111	0.162095	659099	322869	262721	414897	0.420381	416093	232052	235769	294638	0.291527	534902	625698	612116	590905	0.0676705
Q6NVY1	HIBCH	3-hydroxyisobutyryl-CoA hydrolase, mitochondrial	3	3	0.24681	0.0487823		21.7471	21.8423	21.9495	22.0886	22.2096	21.9812	3.25745e+06	3.44357e+06	3.84988e+06	3.51697e+06	0.0703348	3.91134e+06	3.72985e+06	3.63771e+06	3.75963e+06	0.0302361	4.46573e+06	3.75717e+06	3.93841e+06	4.05377e+06	0.0741405	5.12279e+06	4.40334e+06	3.83988e+06	4.45534e+06	0.117844	4.88065e+06	4.59631e+06	5.08335e+06	4.85344e+06	0.0411595	3.81781e+06	4.2977e+06	4.31212e+06	4.14254e+06	0.0554488
P16070	CD44	CD44 antigen	5	5	0.328868	0.0488188		27.3494	27.391	27.524	27.9539	27.604	27.6931	1.69902e+08	1.72091e+08	1.69989e+08	1.70661e+08	0.00592877	1.66776e+08	1.8082e+08	1.80651e+08	1.76082e+08	0.0373743	1.89636e+08	1.93022e+08	1.9624e+08	1.92966e+08	0.0139745	2.66879e+08	2.5475e+08	2.58384e+08	2.60004e+08	0.0195473	2.08712e+08	2.05111e+08	1.98169e+08	2.03997e+08	0.0214486	2.08529e+08	2.23129e+08	2.19053e+08	2.16904e+08	0.0283591
Q13332	PTPRS	Receptor-type tyrosine-protein phosphatase S	4	4	1.31036	0.0488985	+	21.0559	19.6731	20.265	21.85	21.9171	21.1581	2.10094e+06	2.45946e+06	1.98768e+06	2.18269e+06	0.0921298	913662	546424	1.04793e+06	836005	0.253556	1.426e+06	1.07988e+06	1.27926e+06	1.26171e+06	0.112421	4.09624e+06	3.72955e+06	3.51739e+06	3.78106e+06	0.0632372	4.08067e+06	4.17642e+06	3.61045e+06	3.95585e+06	0.0625247	2.70085e+06	2.22741e+06	2.09067e+06	2.33964e+06	0.111744
Q16527	CSRP2	Cysteine and glycine-rich protein 2	4	4	-2.17123	0.0489563	+	21.5642	23.8293	21.9339	19.8172	20.0783	20.9182	3.18028e+06	3.4427e+06	2.67905e+06	3.10068e+06	0.102171	1.51746e+07	1.45142e+07	1.50264e+07	1.49051e+07	0.0189814	4.28693e+06	3.88672e+06	3.84546e+06	4.00637e+06	0.0496955	1.02274e+06	1.01333e+06	735200	923756	0.144393	1.1257e+06	1.11518e+06	1.08032e+06	1.10706e+06	0.0175193	2.02497e+06	1.96558e+06	1.95393e+06	1.98149e+06	0.0156998
P62841	RPS15	40S ribosomal protein S15	2	2	-0.239244	0.0490813		27.6547	27.6625	27.4646	27.4371	27.3793	27.2476	1.93268e+08	2.12942e+08	2.27664e+08	2.11291e+08	0.0666878	2.13479e+08	2.10924e+08	2.12927e+08	2.12443e+08	0.00516819	1.7699e+08	1.89703e+08	1.88942e+08	1.85212e+08	0.0314315	1.53274e+08	2.02583e+08	1.89291e+08	1.81716e+08	0.114632	1.59229e+08	1.91576e+08	1.72923e+08	1.74576e+08	0.0759395	1.51854e+08	1.56311e+08	1.6989e+08	1.59352e+08	0.0481372
P06703	S100A6	Protein S100-A6	3	3	1.1956	0.0490865	+	21.4676	21.6628	22.1079	22.5213	23.7077	22.5961	2.62051e+06	2.8875e+06	3.19131e+06	2.89977e+06	0.0804162	3.61862e+06	2.98479e+06	3.35985e+06	3.32109e+06	0.0783503	4.55447e+06	4.60056e+06	4.40904e+06	4.52136e+06	0.0180511	4.80179e+06	6.72684e+06	6.53279e+06	6.02047e+06	0.143739	8.8985e+06	1.58108e+07	1.62692e+07	1.36595e+07	0.246841	6.77094e+06	6.24245e+06	5.99404e+06	6.33581e+06	0.0511325
P24534	EEF1B2	Elongation factor 1-beta	5	5	-0.465623	0.0491885		26.7769	26.6843	26.629	26.241	25.9473	26.505	1.13651e+08	1.1866e+08	1.1265e+08	1.14987e+08	0.0228623	1.11111e+08	1.03806e+08	1.08597e+08	1.07838e+08	0.0281005	1.05272e+08	1.01888e+08	1.04198e+08	1.03786e+08	0.0136045	7.91384e+07	8.14497e+07	7.73422e+07	7.93101e+07	0.0211986	6.75152e+07	6.49641e+07	6.16304e+07	6.47032e+07	0.0372398	9.5117e+07	9.45216e+07	9.60735e+07	9.52374e+07	0.0067124
P39656	DDOST	Dolichyl-diphosphooligosaccharide--protein glycosyltransferase 48 kDa subunit	10	9	-0.260363	0.0494642		27.1617	26.9667	26.929	26.7973	26.8368	26.6422	1.44862e+08	1.53171e+08	1.52387e+08	1.5014e+08	0.0249479	1.33418e+08	1.26804e+08	1.33243e+08	1.31155e+08	0.0234659	1.26303e+08	1.28484e+08	1.28529e+08	1.27772e+08	0.00813023	1.19336e+08	1.17338e+08	1.1319e+08	1.16621e+08	0.0219472	1.19525e+08	1.22269e+08	1.17805e+08	1.19866e+08	0.0153358	1.03735e+08	1.05425e+08	1.05061e+08	1.0474e+08	0.0069342
P06756	ITGAV	Integrin alpha-V	24	23	-0.273246	0.0495464		27.1785	27.4265	27.3687	27.1779	26.9837	26.9924	1.47977e+08	1.48534e+08	1.59179e+08	1.51897e+08	0.0339333	1.8446e+08	1.78143e+08	1.78559e+08	1.80387e+08	0.0159932	1.72756e+08	1.71478e+08	1.75663e+08	1.73299e+08	0.0101046	1.42789e+08	1.56449e+08	1.56259e+08	1.51833e+08	0.042119	1.22053e+08	1.3689e+08	1.39181e+08	1.32708e+08	0.05721	1.29683e+08	1.34051e+08	1.36805e+08	1.33513e+08	0.0219635
P18621	RPL17	60S ribosomal protein L17	9	9	-0.273678	0.0498632		27.6082	27.5954	27.3303	27.2508	27.297	27.1651	2.03771e+08	2.02515e+08	2.07508e+08	2.04598e+08	0.0103662	1.88992e+08	2.07149e+08	2.12216e+08	2.02786e+08	0.0491686	1.68761e+08	1.68181e+08	1.69304e+08	1.68749e+08	0.00271653	1.67906e+08	1.54222e+08	1.56983e+08	1.59704e+08	0.0369975	1.65035e+08	1.64902e+08	1.6475e+08	1.64896e+08	0.000706283	1.45916e+08	1.52252e+08	1.53294e+08	1.50487e+08	0.0216638
P02792	FTL	Ferritin light chain	4	4	-0.455582	0.0498728		25.8172	26.1136	26.2354	25.725	25.3869	25.6876	5.74133e+07	6.25059e+07	5.74467e+07	5.9122e+07	0.040473	7.03116e+07	7.44261e+07	7.30844e+07	7.26073e+07	0.0235964	8.20123e+07	7.59204e+07	7.90767e+07	7.90031e+07	0.0314868	5.81288e+07	5.56234e+07	5.26353e+07	5.54625e+07	0.0404888	4.46631e+07	4.22223e+07	4.47369e+07	4.38741e+07	0.0266296	5.64594e+07	5.1237e+07	5.44308e+07	5.40424e+07	0.0397769
P31939	ATIC	Bifunctional purine biosynthesis protein PURH	18	17	0.150008	0.0504292		25.6918	25.7645	25.8457	25.8764	25.9781	25.8974	5.22874e+07	5.56628e+07	5.47101e+07	5.42201e+07	0.0262061	5.61427e+07	5.64063e+07	5.83306e+07	5.69599e+07	0.0171211	6.02496e+07	6.01082e+07	6.05884e+07	6.03154e+07	0.00334065	5.94003e+07	6.34298e+07	6.18208e+07	6.15503e+07	0.0269066	6.08797e+07	6.98852e+07	6.76293e+07	6.61314e+07	0.057855	6.02696e+07	6.20404e+07	6.51924e+07	6.25008e+07	0.0325737
Q8WX93	PALLD	Palladin	5	5	-1.31745	0.0505122	+	23.0243	23.5019	23.0471	22.7594	21.2917	21.5699	7.67624e+06	8.59939e+06	9.31806e+06	8.53123e+06	0.0787699	1.04486e+07	1.33746e+07	1.18135e+07	1.18789e+07	0.100634	8.52081e+06	9.54052e+06	7.94001e+06	8.66711e+06	0.0763281	7.07426e+06	6.81615e+06	7.41007e+06	7.10016e+06	0.0342467	1.98889e+06	3.20473e+06	2.50748e+06	2.56703e+06	0.194056	2.78396e+06	3.2507e+06	3.30444e+06	3.11303e+06	0.0750785
Q96JM3	CHAMP1	Chromosome alignment-maintaining phosphoprotein 1	2	2	-0.870089	0.050633	+	17.1239	16.1951	16.235	15.8083	15.5207	15.6148	226885	143721	57883.6	142830	0.483073	77119	109486	38469.2	75024.8	0.386943	107594	58600	65198.8	77131.1	0.281452	34572.1	80193.8	57373.2	57379.7	0.324592	29969	102734	8328.86	47010.7	0.85897	67587.6	75609.9	7342.37	50180	0.60716
P32969	RPL9	60S ribosomal protein L9	11	11	-0.276322	0.050783		26.9398	27.0084	26.8735	26.7625	26.7502	26.48	1.19894e+08	1.31619e+08	1.34678e+08	1.28731e+08	0.0494966	1.36445e+08	1.32072e+08	1.36486e+08	1.35001e+08	0.0153419	1.21152e+08	1.19394e+08	1.28299e+08	1.22949e+08	0.0313228	9.79012e+07	1.21659e+08	1.21977e+08	1.13846e+08	0.0990404	1.09706e+08	1.16248e+08	1.12676e+08	1.12877e+08	0.0236956	9.03827e+07	9.36895e+07	9.67283e+07	9.36002e+07	0.027685
Q6PGP7	TTC37	Tetratricopeptide repeat protein 37	5	5	-0.380871	0.0508876		21.2879	21.5115	21.4848	21.228	20.8237	21.0899	2.4825e+06	2.57314e+06	2.62537e+06	2.56033e+06	0.0230529	2.58178e+06	3.7345e+06	2.65224e+06	2.98951e+06	0.176475	3.00608e+06	2.98039e+06	2.81787e+06	2.93478e+06	0.0283932	2.74139e+06	2.19449e+06	2.43298e+06	2.45628e+06	0.0911449	1.70224e+06	2.19179e+06	1.67358e+06	1.85587e+06	0.128145	1.8324e+06	2.11243e+06	2.75103e+06	2.23195e+06	0.172241
P43897	TSFM	Elongation factor Ts, mitochondrial	3	3	0.395358	0.0510301		23.2185	23.3778	23.3239	23.7286	23.9225	23.4551	9.77756e+06	9.23434e+06	1.028e+07	9.76396e+06	0.0437308	1.01412e+07	1.09831e+07	1.14484e+07	1.08576e+07	0.0498236	9.58279e+06	1.08482e+07	1.0988e+07	1.0473e+07	0.0603508	1.11139e+07	1.50684e+07	1.54055e+07	1.38626e+07	0.140556	1.37386e+07	1.73878e+07	1.66405e+07	1.59223e+07	0.0988521	1.24792e+07	1.07615e+07	1.1186e+07	1.14756e+07	0.0636601
Q13555	CAMK2G	Calcium/calmodulin-dependent protein kinase type II subunit gamma	7	4	0.173469	0.0510456		21.4576	21.3752	21.4972	21.6453	21.5165	21.6886	2.92392e+06	3.26838e+06	2.46159e+06	2.88463e+06	0.114586	2.40768e+06	2.68507e+06	3.06775e+06	2.72017e+06	0.0994834	2.91552e+06	2.87433e+06	3.07937e+06	2.95641e+06	0.0299544	3.11577e+06	3.10671e+06	3.63087e+06	3.28445e+06	0.0745889	3.30017e+06	2.66919e+06	3.0268e+06	2.99872e+06	0.0861561	3.43794e+06	3.20356e+06	3.48683e+06	3.37611e+06	0.0366202
Q709F0	ACAD11	Acyl-CoA dehydrogenase family member 11	2	2	0.308483	0.0514824		20.5823	20.6096	20.8576	21.1079	21.002	20.8651	1.47611e+06	1.37944e+06	1.84652e+06	1.56736e+06	0.128438	1.60386e+06	1.5783e+06	1.62716e+06	1.60311e+06	0.0124467	2.14595e+06	1.71872e+06	1.84562e+06	1.90343e+06	0.0941151	1.89162e+06	2.56776e+06	2.32371e+06	2.26103e+06	0.123646	2.04472e+06	2.18904e+06	2.07549e+06	2.10308e+06	0.0295117	2.60625e+06	1.608e+06	1.50649e+06	1.90692e+06	0.260232
Q15738	NSDHL	Sterol-4-alpha-carboxylate 3-dehydrogenase, decarboxylating	5	5	0.287453	0.0516519		23.5869	23.6649	23.632	23.9672	24.0609	23.7182	1.31693e+07	1.11403e+07	1.36173e+07	1.26423e+07	0.0852455	1.52131e+07	1.24133e+07	1.21415e+07	1.3256e+07	0.104732	1.28247e+07	1.29578e+07	1.31565e+07	1.29797e+07	0.0105031	1.52612e+07	1.63898e+07	1.75962e+07	1.64157e+07	0.0580819	1.7216e+07	1.67636e+07	1.84749e+07	1.74848e+07	0.0414095	1.2049e+07	1.47743e+07	1.47037e+07	1.38423e+07	0.0916306
O00300	TNFRSF11B	Tumor necrosis factor receptor superfamily member 11B	2	2	-1.29482	0.0516927	+	21.5601	22.2613	20.6762	20.0316	20.4121	20.1695	3.21154e+06	3.14573e+06	2.91866e+06	3.09198e+06	0.0405776	5.18216e+06	5.27806e+06	4.62127e+06	5.02716e+06	0.0576204	1.82085e+06	1.47658e+06	1.72933e+06	1.67559e+06	0.0868925	1.1331e+06	1.18604e+06	896243	1.07179e+06	0.117561	1.23104e+06	1.36434e+06	1.59027e+06	1.39522e+06	0.106272	1.30747e+06	1.32394e+06	906568	1.17933e+06	0.163642
P82932	MRPS6	28S ribosomal protein S6, mitochondrial	2	2	0.483626	0.0518308		22.2419	22.3045	22.0592	22.7816	22.9024	22.3725	5.03461e+06	5.41486e+06	4.43443e+06	4.9613e+06	0.0813498	5.55499e+06	4.48735e+06	5.49518e+06	5.17917e+06	0.0945714	4.25299e+06	4.50308e+06	4.33978e+06	4.36528e+06	0.0237503	6.32413e+06	8.43898e+06	6.86873e+06	7.21061e+06	0.124343	6.86656e+06	8.23088e+06	8.43589e+06	7.84445e+06	0.0887906	6.78129e+06	4.94274e+06	4.5524e+06	5.42548e+06	0.179129
Q9BVC5	C2orf49	Ashwin	2	2	0.510113	0.0520629		20.5451	20.7223	20.5731	21.4425	20.8269	21.1015	1.85204e+06	1.22886e+06	1.51763e+06	1.53284e+06	0.166122	1.89822e+06	1.48707e+06	1.8052e+06	1.73016e+06	0.101746	1.45387e+06	1.23044e+06	1.98956e+06	1.55796e+06	0.204454	2.12045e+06	3.04393e+06	3.38247e+06	2.84895e+06	0.187208	2.22739e+06	1.84642e+06	1.49533e+06	1.85638e+06	0.161036	2.82338e+06	1.76213e+06	2.17609e+06	2.25387e+06	0.193769
Q92734	TFG	Protein TFG	3	3	-0.496343	0.0521044		23.9048	23.9546	23.8311	23.4401	23.0746	23.6867	1.76635e+07	1.43098e+07	1.5143e+07	1.57054e+07	0.0907808	1.42869e+07	1.63037e+07	1.81805e+07	1.6257e+07	0.0977976	1.33892e+07	1.40982e+07	1.72824e+07	1.49233e+07	0.113452	1.11931e+07	1.13152e+07	1.1633e+07	1.13804e+07	0.0162919	8.86866e+06	8.79061e+06	8.84186e+06	8.83371e+06	0.00366519	1.38172e+07	1.35631e+07	1.31268e+07	1.35024e+07	0.0211159
O00231	PSMD11	26S proteasome non-ATPase regulatory subunit 11	11	11	-0.334035	0.0521047		24.6528	24.4466	24.2563	24.0905	24.2008	24.0622	2.68374e+07	2.76339e+07	2.46637e+07	2.63783e+07	0.0475871	2.37007e+07	2.23469e+07	2.25451e+07	2.28642e+07	0.0261093	2.14818e+07	1.93071e+07	1.93259e+07	2.00382e+07	0.0509405	1.84287e+07	1.80116e+07	1.71495e+07	1.78633e+07	0.0298196	2.13849e+07	1.78869e+07	1.85781e+07	1.92833e+07	0.0784406	1.82038e+07	1.67566e+07	1.75902e+07	1.75169e+07	0.0338571
Q9Y2V2	CARHSP1	Calcium-regulated heat stable protein 1	2	2	-0.28207	0.052598		24.1601	23.9821	23.8978	23.8464	23.7384	23.6089	1.74922e+07	1.9828e+07	1.89205e+07	1.87469e+07	0.0512866	1.61547e+07	1.7228e+07	1.63267e+07	1.65698e+07	0.0284072	1.59663e+07	1.58715e+07	1.50509e+07	1.56295e+07	0.026296	1.73053e+07	1.38572e+07	1.40874e+07	1.50833e+07	0.104355	1.53892e+07	1.32044e+07	1.33926e+07	1.39954e+07	0.0706331	1.21374e+07	1.26163e+07	1.36257e+07	1.27932e+07	0.0484896
Q13263	TRIM28	Transcription intermediary factor 1-beta	11	10	0.234723	0.0526084		25.6757	25.9248	25.705	25.9738	25.9628	26.0732	5.58705e+07	5.31989e+07	5.18325e+07	5.3634e+07	0.0312673	6.07573e+07	6.67679e+07	6.36961e+07	6.37404e+07	0.0385002	5.34604e+07	5.34948e+07	5.71196e+07	5.46916e+07	0.0313923	6.52422e+07	6.66769e+07	6.57595e+07	6.58929e+07	0.0090035	6.47271e+07	6.3185e+07	6.83088e+07	6.5407e+07	0.0328149	6.91936e+07	7.30787e+07	6.96423e+07	7.06382e+07	0.0245674
P60953	CDC42	Cell division control protein 42 homolog	7	7	0.204884	0.052659		26.8142	26.7517	26.673	26.9977	27.0296	26.8264	1.10288e+08	1.19479e+08	1.24978e+08	1.18248e+08	0.0512496	1.17346e+08	1.06869e+08	1.15129e+08	1.13115e+08	0.0398538	1.07172e+08	1.05635e+08	1.09358e+08	1.07388e+08	0.0142215	1.1522e+08	1.43716e+08	1.43533e+08	1.34157e+08	0.0998107	1.29757e+08	1.36433e+08	1.45356e+08	1.37182e+08	0.0465804	1.07484e+08	1.24129e+08	1.24006e+08	1.1854e+08	0.0659511
O94979	SEC31A	Protein transport protein Sec31A	17	17	-0.315023	0.0527119		25.3088	25.5592	25.3509	25.1077	24.9351	25.2311	4.29146e+07	4.06006e+07	4.11715e+07	4.15623e+07	0.0236819	4.89427e+07	4.90347e+07	5.03493e+07	4.94422e+07	0.0129946	4.25369e+07	4.26589e+07	4.31883e+07	4.27947e+07	0.00660607	3.68538e+07	3.69751e+07	3.46389e+07	3.61559e+07	0.0296998	3.3482e+07	3.13944e+07	3.13566e+07	3.20777e+07	0.0309609	4.11518e+07	3.91045e+07	3.78932e+07	3.93831e+07	0.0341471
O75494	SRSF10	Serine/arginine-rich splicing factor 10	2	2	0.250983	0.0530119		24.4041	24.4984	24.2961	24.6595	24.7695	24.5225	2.15186e+07	2.20373e+07	2.31566e+07	2.22375e+07	0.0307372	2.51851e+07	2.33371e+07	2.27023e+07	2.37415e+07	0.0443597	2.00789e+07	2.0526e+07	2.1194e+07	2.05996e+07	0.0222447	2.43745e+07	2.78202e+07	2.71968e+07	2.64638e+07	0.0566488	2.43395e+07	3.09877e+07	3.03648e+07	2.8564e+07	0.104956	2.4359e+07	2.34622e+07	2.45727e+07	2.41313e+07	0.0199367
O94906	PRPF6	Pre-mRNA-processing factor 6	2	2	0.685166	0.0530253		18.1704	18.6382	18.8175	19.1531	19.5375	18.9909	119802	476578	289654	295344	0.493352	339158	444748	440081	407996	0.119396	553953	445333	387956	462414	0.148862	399240	554298	796335	583291	0.280142	767437	494005	1.02076e+06	760733	0.28275	257963	453693	849861	520506	0.473032
P58335	ANTXR2	Anthrax toxin receptor 2	4	3	0.545993	0.0534226		21.714	21.2243	21.1519	21.9243	22.0691	21.7348	3.21897e+06	3.04919e+06	4.06502e+06	3.44439e+06	0.128989	2.28844e+06	2.26837e+06	2.79592e+06	2.45091e+06	0.0995946	2.21666e+06	2.54919e+06	2.2299e+06	2.33192e+06	0.0659261	3.92196e+06	4.18969e+06	3.81629e+06	3.97598e+06	0.0395256	4.00161e+06	4.39698e+06	4.81595e+06	4.40485e+06	0.0754846	3.1527e+06	3.73359e+06	3.5725e+06	3.48627e+06	0.070236
P25787	PSMA2	Proteasome subunit alpha type-2	10	10	-0.284199	0.0535271		25.9736	25.9558	25.6596	25.6005	25.607	25.5288	6.52911e+07	6.72086e+07	6.51737e+07	6.58911e+07	0.0141569	6.67748e+07	6.4184e+07	6.42876e+07	6.50821e+07	0.0184024	5.14019e+07	5.05956e+07	5.70137e+07	5.30038e+07	0.0538546	4.7818e+07	5.06807e+07	5.41317e+07	5.08768e+07	0.050736	4.87756e+07	5.34426e+07	5.11058e+07	5.1108e+07	0.0372797	4.69658e+07	4.92757e+07	4.89865e+07	4.84094e+07	0.021226
P23368	ME2	NAD-dependent malic enzyme, mitochondrial	6	6	0.51374	0.0536641		23.5638	23.3239	23.4676	23.8858	24.3031	23.7077	1.13288e+07	1.31822e+07	1.26869e+07	1.23993e+07	0.0631871	1.06903e+07	1.02137e+07	1.06881e+07	1.05307e+07	0.0212872	1.04194e+07	1.16869e+07	1.28279e+07	1.16447e+07	0.0844779	1.37056e+07	1.60125e+07	1.67859e+07	1.55013e+07	0.0844081	1.89312e+07	2.1901e+07	2.12463e+07	2.06928e+07	0.0615664	1.37807e+07	1.36725e+07	1.35627e+07	1.3672e+07	0.00650762
Q9NR30	DDX21	Nucleolar RNA helicase 2	4	4	-0.939969	0.0541542	+	22.5598	21.7568	22.6156	21.7896	21.1986	21.1241	5.83599e+06	6.25154e+06	6.46073e+06	6.18275e+06	0.0419951	3.57807e+06	3.66609e+06	3.38687e+06	3.54368e+06	0.0328913	6.28043e+06	7.36133e+06	5.63838e+06	6.42671e+06	0.110625	3.62629e+06	3.63864e+06	3.61078e+06	3.62524e+06	0.00314431	2.12084e+06	2.37394e+06	2.72528e+06	2.40669e+06	0.102983	1.54516e+06	3.11753e+06	2.19399e+06	2.28556e+06	0.282283
Q9Y4Y9	LSM5	U6 snRNA-associated Sm-like protein LSm5	2	2	0.298086	0.0542661		22.9423	23.1627	22.8249	23.3239	23.1765	23.3239	8.8733e+06	7.36126e+06	7.94133e+06	8.05863e+06	0.077288	8.51943e+06	9.04486e+06	1.06057e+07	9.38999e+06	0.0943535	7.47353e+06	6.92128e+06	7.90928e+06	7.4347e+06	0.0543779	9.56869e+06	1.10252e+07	1.09823e+07	1.05254e+07	0.0642949	8.40657e+06	1.02688e+07	9.7709e+06	9.4821e+06	0.0830205	1.1868e+07	1.00201e+07	9.54321e+06	1.04771e+07	0.0956958
P35580	MYH10	Myosin-10	40	32	-0.287697	0.0544567		26.6509	26.9122	26.7362	26.4621	26.3595	26.6145	1.04062e+08	1.07383e+08	1.04659e+08	1.05368e+08	0.0137193	1.23937e+08	1.27826e+08	1.27119e+08	1.26294e+08	0.0133904	1.114e+08	1.12245e+08	1.11717e+08	1.11787e+08	0.00311976	9.1267e+07	9.25118e+07	9.35617e+07	9.24468e+07	0.0101459	8.29536e+07	8.25998e+07	9.27488e+07	8.61007e+07	0.054623	9.97204e+07	1.0422e+08	1.04301e+08	1.02747e+08	0.020831
Q92544	TM9SF4	Transmembrane 9 superfamily member 4	4	4	-0.319725	0.0545332		23.8471	23.7579	23.6017	23.5807	23.4139	23.2528	1.49537e+07	1.567e+07	1.46456e+07	1.50897e+07	0.0284396	1.517e+07	1.37446e+07	1.36404e+07	1.4185e+07	0.0491928	1.2654e+07	1.24492e+07	1.30862e+07	1.27298e+07	0.0208609	1.19337e+07	1.29284e+07	1.27763e+07	1.25461e+07	0.0348701	1.07662e+07	1.10756e+07	1.16865e+07	1.11761e+07	0.0342109	8.5471e+06	1.02745e+07	1.1164e+07	9.99521e+06	0.108697
Q12797	ASPH	Aspartyl/asparaginyl beta-hydroxylase	24	20	-0.297581	0.0547283		27.5915	27.3463	27.6142	27.3579	27.1316	27.1698	1.95122e+08	2.00895e+08	2.10709e+08	2.02242e+08	0.0318139	1.70419e+08	1.71512e+08	1.69957e+08	1.7063e+08	0.0038208	2.0053e+08	2.11153e+08	2.04678e+08	2.05454e+08	0.0212779	1.65611e+08	1.65177e+08	1.85232e+08	1.72007e+08	0.0543786	1.43239e+08	1.42987e+08	1.54886e+08	1.47038e+08	0.0377507	1.44288e+08	1.54067e+08	1.5459e+08	1.50982e+08	0.0313808
Q02790	FKBP4	Peptidyl-prolyl cis-trans isomerase FKBP4	3	3	-0.0831528	0.0547884		21.6276	21.6364	21.6141	21.5915	21.4874	21.5498	3.25272e+06	3.11361e+06	3.35791e+06	3.24141e+06	0.0308676	3.01562e+06	3.52023e+06	3.24572e+06	3.26052e+06	0.0632639	3.0531e+06	2.95462e+06	3.6243e+06	3.21067e+06	0.0919521	3.19764e+06	3.30062e+06	2.97991e+06	3.15939e+06	0.0423163	2.39851e+06	3.10662e+06	3.31372e+06	2.93962e+06	0.1333	2.89037e+06	3.54444e+06	2.78122e+06	3.07201e+06	0.109706
Q9HCN8	SDF2L1	Stromal cell-derived factor 2-like protein 1	3	3	-0.374812	0.0548315		22.9553	23.3489	22.9323	22.7728	22.6691	22.6701	8.05187e+06	8.34217e+06	8.00408e+06	8.13271e+06	0.0183694	9.88442e+06	1.10895e+07	1.10763e+07	1.06834e+07	0.0528861	8.23751e+06	7.02014e+06	8.7548e+06	8.00415e+06	0.0908454	6.75534e+06	7.3201e+06	7.42404e+06	7.1665e+06	0.0409974	6.44386e+06	6.85069e+06	6.71338e+06	6.66931e+06	0.0253379	6.90039e+06	6.65998e+06	6.46158e+06	6.67398e+06	0.0268833
O75396	SEC22B	Vesicle-trafficking protein SEC22b	9	9	-0.265372	0.0551698		27.4735	27.2776	27.3096	27.1935	27.1356	26.9354	1.90597e+08	1.86823e+08	1.81654e+08	1.86358e+08	0.0196725	1.54505e+08	1.67944e+08	1.65631e+08	1.62693e+08	0.0360576	1.66374e+08	1.58194e+08	1.74458e+08	1.66342e+08	0.039915	1.56323e+08	1.53936e+08	1.50193e+08	1.53484e+08	0.0164369	1.54242e+08	1.50809e+08	1.37294e+08	1.47448e+08	0.0496144	1.24828e+08	1.29966e+08	1.30225e+08	1.2834e+08	0.0193667
P33316	DUT	Deoxyuridine 5'-triphosphate nucleotidohydrolase, mitochondrial	4	4	0.391764	0.0552186		23.7492	23.8764	23.5983	24.0609	24.3712	23.9672	1.53281e+07	1.27499e+07	1.42862e+07	1.41214e+07	0.0749914	1.78326e+07	1.35546e+07	1.4844e+07	1.54104e+07	0.116273	1.0147e+07	1.22649e+07	1.55922e+07	1.2668e+07	0.176917	1.5655e+07	1.94643e+07	1.75188e+07	1.75461e+07	0.0886392	2.11618e+07	2.02276e+07	2.37023e+07	2.16972e+07	0.067668	1.53755e+07	1.81375e+07	1.55397e+07	1.63509e+07	0.0773716
P53992	SEC24C	Protein transport protein Sec24C	5	5	-0.252149	0.0552664		22.7043	22.9639	22.7322	22.4566	22.5947	22.5926	6.55879e+06	7.16884e+06	6.77465e+06	6.83409e+06	0.0369579	8.10947e+06	7.95978e+06	8.47449e+06	8.18125e+06	0.026423	7.02047e+06	6.67318e+06	7.20827e+06	6.9673e+06	0.0318144	5.75999e+06	5.03521e+06	6.47256e+06	5.75592e+06	0.101947	6.40221e+06	6.06431e+06	6.53618e+06	6.33423e+06	0.0313447	6.13371e+06	5.95957e+06	6.881e+06	6.32476e+06	0.0631955
P27487	DPP4	Dipeptidyl peptidase 4	18	17	-0.54399	0.0555251		27.2811	27.5909	27.7969	26.7902	26.9831	27.2636	1.61855e+08	1.61595e+08	1.65824e+08	1.63091e+08	0.0118644	1.90482e+08	2.06806e+08	2.0917e+08	2.02153e+08	0.0411002	2.27471e+08	2.31168e+08	2.40907e+08	2.33182e+08	0.0243041	1.16069e+08	1.17981e+08	1.14107e+08	1.16052e+08	0.0136311	1.29905e+08	1.37641e+08	1.30407e+08	1.32651e+08	0.0266451	1.55864e+08	1.6236e+08	1.65161e+08	1.61128e+08	0.0241675
Q92522	H1-10	Histone H1x	5	5	0.369381	0.0556643		24.1253	24.0772	24.4984	24.5285	24.6375	24.6431	1.91852e+07	1.88356e+07	1.68059e+07	1.82755e+07	0.057398	2.01423e+07	1.70208e+07	1.59851e+07	1.77161e+07	0.0997354	2.46938e+07	2.42831e+07	2.21531e+07	2.371e+07	0.0469678	2.6198e+07	2.35867e+07	2.27561e+07	2.41802e+07	0.0606485	3.10804e+07	2.34315e+07	2.36673e+07	2.60597e+07	0.136282	2.94711e+07	2.50565e+07	2.4191e+07	2.62395e+07	0.0881188
Q6DKI1	RPL7L1	60S ribosomal protein L7-like 1	2	2	-0.474271	0.0558048		19.8656	19.8508	19.6234	19.1354	19.1573	19.6242	977630	1.02355e+06	864650	955276	0.0698932	869852	1.03547e+06	931289	945539	0.0722992	671785	845475	905692	807651	0.122784	448515	694146	585006	575889	0.174488	544947	576949	632140	584679	0.0615952	753341	825572	845395	808103	0.0489527
P28070	PSMB4	Proteasome subunit beta type-4	5	4	-0.34772	0.0559102		24.3124	23.9251	23.9188	23.7098	23.7122	23.6912	1.98664e+07	2.19004e+07	2.0732e+07	2.08329e+07	0.040005	1.57867e+07	1.65521e+07	1.54476e+07	1.59288e+07	0.0290006	1.46505e+07	1.93935e+07	1.35318e+07	1.58586e+07	0.160223	1.33254e+07	1.38088e+07	1.40253e+07	1.37198e+07	0.0213239	1.48271e+07	1.39312e+07	1.24702e+07	1.37428e+07	0.0706836	1.37143e+07	1.3778e+07	1.31401e+07	1.35441e+07	0.0211798
P12694	BCKDHA	2-oxoisovalerate dehydrogenase subunit alpha, mitochondrial	4	4	0.455254	0.0560122		21.8802	22.2535	22.0821	22.3484	22.7856	22.4476	3.81527e+06	4.3528e+06	3.41338e+06	3.86048e+06	0.099689	4.68387e+06	5.46096e+06	4.86998e+06	5.00493e+06	0.0661924	4.80961e+06	4.00612e+06	4.49391e+06	4.43655e+06	0.0745003	5.80537e+06	5.30321e+06	4.8997e+06	5.33609e+06	0.0694267	6.64008e+06	7.87821e+06	7.16098e+06	7.22643e+06	0.0702392	5.7932e+06	5.56125e+06	5.81444e+06	5.72297e+06	0.0200384
P98160	HSPG2	Basement membrane-specific heparan sulfate proteoglycan core protein	77	75	0.696377	0.0560438		27.8324	28.6216	28.258	28.6831	29.019	29.099	2.33617e+08	2.38149e+08	2.44658e+08	2.38808e+08	0.0189741	3.99414e+08	4.19865e+08	4.21149e+08	4.13476e+08	0.0240816	3.10831e+08	3.19582e+08	3.31122e+08	3.20511e+08	0.025927	4.32654e+08	4.30823e+08	4.30347e+08	4.31275e+08	0.00230591	5.58264e+08	5.35642e+08	5.37366e+08	5.43757e+08	0.0189088	5.65709e+08	5.77137e+08	5.81897e+08	5.74914e+08	0.0118162
Q9Y512	SAMM50	Sorting and assembly machinery component 50 homolog	7	6	0.22803	0.0561782		24.9316	24.8904	24.9847	25.2317	25.2571	25.002	3.24543e+07	3.21245e+07	3.13276e+07	3.19688e+07	0.0147953	3.19728e+07	3.03642e+07	3.09848e+07	3.11072e+07	0.0212942	3.03389e+07	3.45162e+07	3.47887e+07	3.32146e+07	0.0613128	3.4431e+07	4.13226e+07	4.25263e+07	3.94266e+07	0.0904581	4.03597e+07	3.87056e+07	4.12728e+07	4.01127e+07	0.0264882	2.98556e+07	3.52392e+07	3.55967e+07	3.35639e+07	0.0782438
P53007	SLC25A1	Tricarboxylate transport protein, mitochondrial	8	8	0.416323	0.0561869		25.1719	25.2821	25.391	25.7077	25.9406	25.4457	3.66751e+07	3.71418e+07	3.94831e+07	3.77666e+07	0.0325312	3.96533e+07	4.06613e+07	4.21086e+07	4.08077e+07	0.0246939	4.18078e+07	4.42118e+07	4.58701e+07	4.39633e+07	0.0379345	5.45193e+07	5.58976e+07	5.40784e+07	5.48318e+07	0.0141312	5.98858e+07	6.87477e+07	6.45929e+07	6.44088e+07	0.0562061	4.68102e+07	4.51518e+07	4.51834e+07	4.57152e+07	0.0169399
P01033	TIMP1	Metalloproteinase inhibitor 1	2	2	0.299553	0.0564583		22.8519	23.0258	23.1901	23.2405	23.4298	23.2961	7.7714e+06	6.75026e+06	8.17537e+06	7.56568e+06	0.0792669	7.65318e+06	8.93611e+06	9.02869e+06	8.53933e+06	0.0735116	9.59799e+06	9.83511e+06	9.27934e+06	9.57082e+06	0.0237915	9.27676e+06	1.01941e+07	1.0274e+07	9.91495e+06	0.0456325	1.07352e+07	1.15681e+07	1.16339e+07	1.13124e+07	0.0361603	1.07595e+07	1.04813e+07	9.72658e+06	1.03225e+07	0.0422757
Q6UN15	FIP1L1	Pre-mRNA 3'-end-processing factor FIP1	3	3	0.437202	0.0564845		21.9882	22.1206	22.0459	22.5522	22.7286	22.1856	3.39219e+06	4.16304e+06	4.92396e+06	4.15973e+06	0.150334	4.69916e+06	3.61222e+06	5.37045e+06	4.56061e+06	0.15885	4.07249e+06	4.76027e+06	4.14678e+06	4.32651e+06	0.0712373	5.25431e+06	6.23676e+06	6.95597e+06	6.14901e+06	0.113427	6.8861e+06	6.80681e+06	7.1701e+06	6.95434e+06	0.0224265	4.58834e+06	4.8353e+06	4.88274e+06	4.76879e+06	0.0270633
P62913	RPL11	60S ribosomal protein L11	10	10	-0.186473	0.0565249		27.4849	27.5061	27.3321	27.2657	27.3243	27.1738	1.80393e+08	1.89434e+08	1.93689e+08	1.87839e+08	0.0295154	1.8293e+08	1.98078e+08	1.90861e+08	1.90623e+08	0.0324547	1.65399e+08	1.59612e+08	1.81871e+08	1.68961e+08	0.0558115	1.5796e+08	1.59136e+08	1.66968e+08	1.61355e+08	0.0247792	1.67271e+08	1.6615e+08	1.70721e+08	1.68047e+08	0.011574	1.50144e+08	1.50459e+08	1.53603e+08	1.51402e+08	0.0103161
Q9NP97	DYNLRB1	Dynein light chain roadblock-type 1	2	2	-0.250204	0.0565476		24.0915	24.0095	23.7811	23.6804	23.7192	23.7319	1.79041e+07	1.76457e+07	1.80782e+07	1.7876e+07	0.0099394	1.75896e+07	1.53396e+07	1.77356e+07	1.68882e+07	0.0649389	1.49351e+07	1.36842e+07	1.46266e+07	1.44153e+07	0.0369109	1.30168e+07	1.43599e+07	1.29546e+07	1.34437e+07	0.0482217	1.38722e+07	1.32034e+07	1.43543e+07	1.381e+07	0.0341722	1.40106e+07	1.23136e+07	1.54713e+07	1.39318e+07	0.092617
Q9BYD1	MRPL13	39S ribosomal protein L13, mitochondrial	2	2	0.413238	0.0569392		20.1079	20.4775	20.2066	20.6276	20.8876	20.5165	854713	1.48637e+06	1.03853e+06	1.12654e+06	0.235478	1.42295e+06	1.19318e+06	1.7778e+06	1.46464e+06	0.164195	1.28885e+06	944415	1.40808e+06	1.21378e+06	0.161966	1.34812e+06	1.74869e+06	1.77261e+06	1.62314e+06	0.119962	1.69095e+06	2.28722e+06	1.85504e+06	1.9444e+06	0.129343	1.6369e+06	1.70646e+06	1.16586e+06	1.50308e+06	0.159759
Q9NX20	MRPL16	39S ribosomal protein L16, mitochondrial	2	2	0.561446	0.0571089		20.0156	20.5823	20.4676	21.0426	21.0359	20.6714	987686	818335	1.36824e+06	1.05809e+06	0.217327	1.69838e+06	1.42118e+06	1.5862e+06	1.56859e+06	0.0725808	1.41378e+06	1.32961e+06	1.60038e+06	1.44792e+06	0.0781452	2.10298e+06	1.87409e+06	2.50271e+06	2.15993e+06	0.120268	1.71446e+06	2.48336e+06	2.26607e+06	2.15463e+06	0.150207	1.60708e+06	1.85291e+06	1.561e+06	1.67366e+06	0.0765592
Q9NP58	ABCB6	ATP-binding cassette sub-family B member 6, mitochondrial	2	2	-0.635452	0.0573851		22.2672	22.7143	22.6027	22.0969	21.4939	22.0869	5.0444e+06	4.30144e+06	5.79697e+06	5.0476e+06	0.120959	6.40839e+06	7.78744e+06	6.44812e+06	6.88132e+06	0.0931402	6.22253e+06	5.03532e+06	7.85019e+06	6.36935e+06	0.181155	3.57495e+06	4.93627e+06	4.94604e+06	4.48575e+06	0.143577	2.11132e+06	3.38901e+06	3.35971e+06	2.95334e+06	0.201643	2.86593e+06	3.93918e+06	6.55944e+06	4.45485e+06	0.348234
Q53H82	LACTB2	Beta-lactamase-like protein 2	2	2	-0.490459	0.0574913		20.1944	20.2204	20.2815	20.0852	19.6836	19.4562	1.27022e+06	1.18465e+06	1.14468e+06	1.19985e+06	0.0436419	1.15009e+06	1.29589e+06	1.21902e+06	1.22166e+06	0.0487453	1.47418e+06	1.10414e+06	1.24513e+06	1.27448e+06	0.119648	1.25466e+06	916488	1.16588e+06	1.11234e+06	0.128698	831910	714011	980259	842060	0.129364	704897	731753	721212	719287	0.0153598
P35080	PFN2	Profilin-2	4	4	-0.606768	0.0575789		24.2674	24.1088	23.5151	23.3796	23.3169	23.3745	1.9534e+07	1.97746e+07	2.12722e+07	2.01936e+07	0.0380813	1.8166e+07	1.75594e+07	1.85472e+07	1.80909e+07	0.0224845	1.15939e+07	1.25784e+07	1.1792e+07	1.19881e+07	0.0354651	9.59139e+06	1.15556e+07	1.15923e+07	1.09131e+07	0.0856511	1.04816e+07	1.17895e+07	9.07592e+06	1.0449e+07	0.106043	1.21978e+07	1.06729e+07	9.75459e+06	1.08751e+07	0.0926557
P46779	RPL28	60S ribosomal protein L28	3	3	-0.341888	0.0579438		26.6224	26.2521	26.257	26.0224	25.9688	26.1146	1.06073e+08	1.08626e+08	9.52294e+07	1.0331e+08	0.0562176	7.82785e+07	8.38649e+07	7.76231e+07	7.99221e+07	0.0350433	8.26988e+07	8.22469e+07	7.56407e+07	8.01955e+07	0.0402264	7.79465e+07	6.29339e+07	6.36021e+07	6.81608e+07	0.101596	7.39412e+07	6.73769e+07	5.57051e+07	6.56744e+07	0.114833	7.63368e+07	7.19561e+07	6.96743e+07	7.26558e+07	0.0380507
Q9Y617	PSAT1	Phosphoserine aminotransferase	3	3	-2.71755	0.0590935	+	22.8549	23.8667	20.4188	19.3029	19.8787	19.8061	7.00563e+06	7.77384e+06	7.97766e+06	7.58571e+06	0.0551741	1.59287e+07	1.49462e+07	1.50153e+07	1.52967e+07	0.0292711	1.36991e+06	1.50879e+06	1.32666e+06	1.40179e+06	0.0554258	387340	798443	754597	646793	0.284994	1.1469e+06	684547	1.06064e+06	964027	0.208226	1.23879e+06	872324	638976	916696	0.269308
O43488	AKR7A2	Aflatoxin B1 aldehyde reductase member 2	5	5	-0.554109	0.0591283		24.1637	23.5111	24.0854	23.4231	23.2645	23.4103	1.85407e+07	1.72917e+07	2.05462e+07	1.87929e+07	0.0713324	1.17287e+07	1.2858e+07	1.12779e+07	1.19549e+07	0.0555929	1.70376e+07	1.6505e+07	1.98583e+07	1.78003e+07	0.08266	1.01699e+07	1.26335e+07	1.0939e+07	1.12475e+07	0.0915024	1.13114e+07	8.89445e+06	1.00236e+07	1.00765e+07	0.0979934	1.08425e+07	1.09234e+07	1.16776e+07	1.11478e+07	0.0337323
Q9HCC0	MCCC2	Methylcrotonoyl-CoA carboxylase beta chain, mitochondrial	7	7	0.399992	0.059287		23.3101	23.1612	23.391	23.654	23.9406	23.4676	1.03159e+07	1.01284e+07	1.07802e+07	1.04081e+07	0.0263223	8.82246e+06	9.08071e+06	1.02298e+07	9.37767e+06	0.0652322	1.06086e+07	1.09077e+07	1.14325e+07	1.0983e+07	0.0310069	1.26821e+07	1.45142e+07	1.25094e+07	1.32352e+07	0.0685386	1.46169e+07	1.61987e+07	1.75424e+07	1.61193e+07	0.0741758	1.27048e+07	1.03205e+07	1.1687e+07	1.15708e+07	0.0844237
P08195	SLC3A2	4F2 cell-surface antigen heavy chain	7	7	-1.36292	0.059504	+	24.472	23.8496	22.7264	22.1475	22.5242	22.2876	2.40456e+07	2.53646e+07	2.04019e+07	2.32707e+07	0.0901897	1.62091e+07	1.53156e+07	1.38249e+07	1.51165e+07	0.0650578	6.95427e+06	6.66361e+06	7.20132e+06	6.93973e+06	0.031667	4.77969e+06	4.76639e+06	4.39154e+06	4.64587e+06	0.0387277	8.03567e+06	5.89798e+06	4.16256e+06	6.03207e+06	0.262601	5.64332e+06	4.91445e+06	4.80072e+06	5.1195e+06	0.0729166
Q6YN16	HSDL2	Hydroxysteroid dehydrogenase-like protein 2	10	10	0.351179	0.059541		25.5492	25.772	25.9203	26.1135	26.2299	25.9517	4.83541e+07	4.91132e+07	4.96885e+07	4.9052e+07	0.0111406	5.53881e+07	5.84731e+07	5.81369e+07	5.73327e+07	0.0241028	6.16143e+07	6.23792e+07	6.65432e+07	6.35122e+07	0.0341012	6.80116e+07	7.24716e+07	7.72169e+07	7.25667e+07	0.051796	7.22891e+07	7.63271e+07	8.73528e+07	7.86564e+07	0.0809403	5.87382e+07	6.66388e+07	6.94435e+07	6.49402e+07	0.0697944
Q9Y5P4	CERT1	Collagen type IV alpha-3-binding protein	2	2	0.679656	0.0595645		18.9516	18.6766	18.1898	19.3167	19.503	19.0372	711018	369209	440968	507065	0.290223	462726	456254	338057	419013	0.136762	379165	245042	272024	298743	0.193891	651668	791681	515047	652799	0.173006	893813	646408	688054	742758	0.145615	673979	477567	460965	537504	0.17998
Q9P0M9	MRPL27	39S ribosomal protein L27, mitochondrial	4	4	0.316225	0.0596764		20.2764	20.2535	20.6096	20.6714	20.7715	20.6453	1.21881e+06	1.38158e+06	1.1993e+06	1.26656e+06	0.0645176	1.36347e+06	1.26577e+06	1.10846e+06	1.2459e+06	0.0843195	1.52806e+06	1.68067e+06	1.5962e+06	1.60164e+06	0.038973	1.82242e+06	1.64405e+06	1.53e+06	1.66549e+06	0.0722542	2.01911e+06	1.711e+06	1.64227e+06	1.79079e+06	0.0915035	1.7444e+06	1.63173e+06	1.53848e+06	1.63821e+06	0.0513919
Q04917	YWHAH	14-3-3 protein eta	9	8	0.487822	0.0598731		24.3578	24.2821	23.867	24.6865	24.8288	24.4551	2.11359e+07	2.10594e+07	2.22436e+07	2.14796e+07	0.0251904	2.3573e+07	1.70457e+07	2.06131e+07	2.04106e+07	0.130746	1.54517e+07	1.58073e+07	1.47646e+07	1.53412e+07	0.0282117	2.48687e+07	2.87312e+07	2.74033e+07	2.70011e+07	0.0593424	3.10511e+07	3.09621e+07	2.72972e+07	2.97701e+07	0.0587503	2.56705e+07	2.11159e+07	2.23564e+07	2.30476e+07	0.083417
P62330	ARF6	ADP-ribosylation factor 6	5	5	0.316594	0.0602088		25.0105	24.8764	24.8191	25.065	25.4266	25.1642	3.53596e+07	3.44597e+07	3.16735e+07	3.38309e+07	0.0463822	3.3183e+07	3.02473e+07	2.89379e+07	3.07894e+07	0.0576484	2.8904e+07	2.89722e+07	3.07995e+07	2.95586e+07	0.0297016	3.55595e+07	3.4484e+07	3.53752e+07	3.51395e+07	0.0133646	4.47335e+07	4.59955e+07	4.45751e+07	4.51014e+07	0.0140916	3.75515e+07	3.81869e+07	3.69274e+07	3.75553e+07	0.0136916
P52948	NUP98	Nuclear pore complex protein Nup98-Nup96	2	2	0.319661	0.0602772		20.6886	20.9601	20.6886	21.0756	21.2535	20.9672	1.90604e+06	1.3386e+06	1.82933e+06	1.69132e+06	0.148625	2.21714e+06	1.74396e+06	2.15052e+06	2.03721e+06	0.102657	1.7045e+06	1.84806e+06	1.5192e+06	1.69058e+06	0.0796271	1.89917e+06	2.26887e+06	2.46289e+06	2.21031e+06	0.105792	2.3066e+06	2.78592e+06	2.42246e+06	2.50499e+06	0.081517	2.37641e+06	1.5533e+06	2.23368e+06	2.05446e+06	0.174807
P35268	RPL22	60S ribosomal protein L22	6	6	-0.238918	0.0604988		27.5726	27.5869	27.419	27.4109	27.2984	27.1524	1.96475e+08	2.05918e+08	1.96435e+08	1.99609e+08	0.0223476	2.13127e+08	1.85158e+08	2.065e+08	2.01595e+08	0.0591944	1.75063e+08	1.79116e+08	1.84172e+08	1.7945e+08	0.0207635	1.57235e+08	1.87885e+08	1.90226e+08	1.78449e+08	0.0842297	1.50525e+08	1.67667e+08	1.76996e+08	1.65063e+08	0.0664146	1.41055e+08	1.52164e+08	1.54287e+08	1.49169e+08	0.0388985
O95249	GOSR1	Golgi SNAP receptor complex member 1	3	3	-0.356799	0.0605385		21.244	21.3718	21.0903	21.0797	20.8596	20.6965	2.51291e+06	2.4543e+06	2.48365e+06	2.48362e+06	0.00963433	2.40008e+06	3.14876e+06	2.59224e+06	2.71369e+06	0.116993	1.98186e+06	2.11211e+06	2.60405e+06	2.23267e+06	0.120004	2.83018e+06	1.85914e+06	1.95939e+06	2.21623e+06	0.196752	2.01681e+06	1.89301e+06	1.79805e+06	1.90262e+06	0.0470759	1.6159e+06	1.69211e+06	1.79002e+06	1.69934e+06	0.0419395
Q13123	IK	Protein Red	5	5	0.303946	0.0605987		21.4576	21.7995	21.5638	22.0292	21.8385	21.8651	2.90298e+06	2.7346e+06	3.00263e+06	2.88007e+06	0.0384075	3.84387e+06	3.52235e+06	3.58557e+06	3.6506e+06	0.0380987	3.43161e+06	3.14366e+06	2.71947e+06	3.09825e+06	0.0944065	4.58127e+06	3.92051e+06	4.34932e+06	4.2837e+06	0.063897	3.32937e+06	3.81421e+06	4.11226e+06	3.75195e+06	0.0859911	3.58275e+06	3.60794e+06	4.27768e+06	3.82279e+06	0.084185
P08842	STS	Steryl-sulfatase	2	2	1.10057	0.060766	+	20.8651	19.9601	20.9601	21.7836	22.1332	21.1704	1.47127e+06	2.40553e+06	1.86214e+06	1.91298e+06	0.200265	991016	934441	1.13904e+06	1.0215e+06	0.0844476	1.8375e+06	1.69152e+06	2.59086e+06	2.03996e+06	0.193179	3.03384e+06	4.09815e+06	3.7059e+06	3.61263e+06	0.12165	4.45935e+06	4.19265e+06	5.1362e+06	4.59606e+06	0.0864104	2.07525e+06	2.5316e+06	2.46322e+06	2.35669e+06	0.0852689
P40926	MDH2	Malate dehydrogenase, mitochondrial	15	14	0.278303	0.0607745		29.21	29.2239	29.3578	29.5203	29.7195	29.3869	6.32347e+08	6.10057e+08	6.20515e+08	6.20973e+08	0.0146631	6.21927e+08	6.18454e+08	6.39421e+08	6.26601e+08	0.0146435	6.64989e+08	6.92041e+08	7.05871e+08	6.87633e+08	0.0246914	7.52126e+08	7.81164e+08	7.76123e+08	7.69804e+08	0.0164568	8.76542e+08	8.79425e+08	8.9463e+08	8.83532e+08	0.0089809	6.70258e+08	7.13262e+08	7.22506e+08	7.02008e+08	0.0324301
Q9GZS3	WDR61	WD repeat-containing protein 61	6	6	-0.272361	0.0610163		23.2146	23.4332	23.2954	23.1752	23.0638	22.8872	8.95326e+06	1.0231e+07	1.0018e+07	9.7341e+06	0.0574203	1.12896e+07	1.08264e+07	1.18633e+07	1.13264e+07	0.0374459	1.00145e+07	1.07141e+07	1.01563e+07	1.0295e+07	0.0293301	8.27096e+06	1.03953e+07	9.74879e+06	9.47169e+06	0.0938719	8.49833e+06	8.85374e+06	8.95163e+06	8.7679e+06	0.0222131	8.05684e+06	6.4278e+06	8.78795e+06	7.75753e+06	0.127166
P28161	GSTM2	Glutathione S-transferase Mu 2	5	3	-0.792706	0.0613021		21.4865	20.7801	21.7174	20.3336	20.5173	20.755	2.6205e+06	3.26091e+06	2.93318e+06	2.9382e+06	0.0889903	1.55383e+06	1.72536e+06	2.1229e+06	1.8007e+06	0.132364	3.03572e+06	3.82309e+06	3.48603e+06	3.44828e+06	0.0935382	1.18772e+06	1.02136e+06	1.75505e+06	1.32138e+06	0.237697	1.38161e+06	1.42749e+06	1.69331e+06	1.50081e+06	0.0915529	1.73595e+06	1.64186e+06	1.93115e+06	1.76966e+06	0.0680816
Q15654	TRIP6	Thyroid receptor-interacting protein 6	3	3	-0.312192	0.0613145		22.2914	22.0311	21.9067	21.8297	21.778	21.685	5.53448e+06	5.26533e+06	4.60003e+06	5.13328e+06	0.0765099	4.41865e+06	4.12293e+06	4.31518e+06	4.28559e+06	0.0285905	3.96732e+06	3.68807e+06	4.13985e+06	3.93175e+06	0.0473443	4.21133e+06	3.50714e+06	3.46334e+06	3.72727e+06	0.0919577	3.99901e+06	3.59084e+06	3.19839e+06	3.59608e+06	0.0908976	3.58569e+06	3.50096e+06	3.02808e+06	3.37157e+06	0.0727673
P35232	PHB1	Prohibitin	17	17	0.27885	0.0614284		28.203	28.249	28.249	28.5826	28.6527	28.3023	3.0703e+08	3.10142e+08	3.10004e+08	3.09059e+08	0.00464435	3.30652e+08	3.16168e+08	3.0985e+08	3.1889e+08	0.0273061	3.10888e+08	3.19135e+08	3.25933e+08	3.18652e+08	0.0193047	3.76348e+08	4.08011e+08	4.20695e+08	4.01684e+08	0.0464273	4.10537e+08	4.15854e+08	4.39432e+08	4.21941e+08	0.0297598	3.23409e+08	3.33356e+08	3.35781e+08	3.30849e+08	0.0161791
Q7Z7H5	TMED4	Transmembrane emp24 domain-containing protein 4	5	3	-0.214231	0.0615257		22.6739	22.7951	22.9306	22.5279	22.6562	22.5729	7.14827e+06	7.02582e+06	5.90051e+06	6.69153e+06	0.0839216	7.09272e+06	7.14483e+06	7.5967e+06	7.27809e+06	0.0310932	8.87076e+06	7.3958e+06	7.71795e+06	7.99484e+06	0.0791988	6.1567e+06	5.99167e+06	5.99356e+06	6.04731e+06	0.0127916	7.30243e+06	6.49292e+06	6.03427e+06	6.60987e+06	0.0793183	6.07464e+06	6.72487e+06	5.91802e+06	6.23918e+06	0.0559916
O14950;P19105	#N/A	Myosin regulatory light chain 12B	8	5	-0.450885	0.0615301		26.8548	26.9306	26.3893	26.2803	26.194	26.3477	1.27723e+08	1.16725e+08	1.19648e+08	1.21365e+08	0.0383262	1.2551e+08	1.34737e+08	1.2349e+08	1.27912e+08	0.0382743	8.83804e+07	8.60611e+07	8.92397e+07	8.78937e+07	0.0152739	8.36313e+07	8.21753e+07	7.86924e+07	8.14997e+07	0.0254251	7.96384e+07	7.69154e+07	7.37517e+07	7.67685e+07	0.031334	8.4999e+07	8.5378e+07	8.58107e+07	8.53959e+07	0.00388295
P41208	CETN2	Centrin-2	2	2	0.568117	0.0615784		20.7056	21.2593	20.9243	21.7715	21.5685	21.2535	1.78934e+06	1.8545e+06	1.49946e+06	1.71443e+06	0.0900111	2.38218e+06	2.35441e+06	2.785e+06	2.50719e+06	0.0784793	1.93827e+06	1.88061e+06	2.13652e+06	1.98513e+06	0.0552113	3.69015e+06	3.41394e+06	3.63715e+06	3.58041e+06	0.0334271	2.98039e+06	2.87142e+06	3.46349e+06	3.1051e+06	0.082863	2.11836e+06	2.49342e+06	2.87816e+06	2.49665e+06	0.124245
P50213	IDH3A	Isocitrate dehydrogenase [NAD] subunit alpha, mitochondrial	6	6	0.37142	0.0616764		24.1015	24.1946	24.2961	24.5345	24.8142	24.3578	1.86194e+07	1.73046e+07	1.80184e+07	1.79808e+07	0.0298895	1.95724e+07	1.90693e+07	1.90732e+07	1.92383e+07	0.0122789	2.08392e+07	2.01088e+07	2.07998e+07	2.05826e+07	0.0162949	2.19873e+07	2.56013e+07	2.52948e+07	2.42945e+07	0.0673487	2.94447e+07	2.83829e+07	3.07871e+07	2.95382e+07	0.0333035	2.13502e+07	2.10476e+07	2.21363e+07	2.15114e+07	0.0213298
P35659	DEK	Protein DEK	10	10	0.222851	0.0617018		24.6096	24.7129	24.5926	24.7234	24.9933	24.867	2.59925e+07	2.39604e+07	2.68951e+07	2.5616e+07	0.0479125	2.69508e+07	2.7934e+07	2.76143e+07	2.74997e+07	0.014891	2.48146e+07	2.44785e+07	2.67545e+07	2.53492e+07	0.0395722	2.94642e+07	2.76294e+07	2.60683e+07	2.77206e+07	0.0500662	3.33429e+07	3.35183e+07	3.32971e+07	3.33861e+07	0.00285547	2.88662e+07	3.21854e+07	3.07494e+07	3.06003e+07	0.0444158
P38117	ETFB	Electron transfer flavoprotein subunit beta	6	6	0.335112	0.0617203		25.7389	25.5638	25.9088	25.9517	26.2335	26.0317	5.7692e+07	5.60435e+07	5.41591e+07	5.59648e+07	0.0257905	4.86431e+07	5.28983e+07	4.71649e+07	4.95688e+07	0.0490317	6.35931e+07	6.03714e+07	6.51648e+07	6.30431e+07	0.0316477	6.96321e+07	6.31207e+07	6.19428e+07	6.48985e+07	0.0521043	8.62708e+07	7.70987e+07	7.34536e+07	7.8941e+07	0.0683082	6.7022e+07	7.0023e+07	6.86851e+07	6.85767e+07	0.0179004
Q9NX14	NDUFB11	NADH dehydrogenase [ubiquinone] 1 beta subcomplex subunit 11, mitochondrial	2	2	-0.30948	0.0618634		21.419	21.1992	21.1908	21.1126	20.9804	20.7876	2.2916e+06	2.90027e+06	3.21993e+06	2.80393e+06	0.137329	1.98743e+06	2.71074e+06	2.52479e+06	2.40765e+06	0.12738	1.79677e+06	2.32443e+06	3.06007e+06	2.39376e+06	0.216423	1.97454e+06	2.24979e+06	2.57764e+06	2.26732e+06	0.108729	2.10779e+06	1.90333e+06	2.19556e+06	2.06889e+06	0.059179	1.96584e+06	1.89745e+06	1.56701e+06	1.8101e+06	0.0962074
Q92499	DDX1	ATP-dependent RNA helicase DDX1	17	17	-0.207685	0.0619629		26.4895	26.6732	26.4428	26.3813	26.2498	26.3514	8.93042e+07	9.4274e+07	9.90723e+07	9.42168e+07	0.0423278	1.04481e+08	1.07381e+08	1.09175e+08	1.07013e+08	0.0180745	8.68917e+07	9.03592e+07	9.64089e+07	9.12199e+07	0.0431129	8.10991e+07	9.04659e+07	9.06633e+07	8.74094e+07	0.0510563	7.31845e+07	8.11319e+07	8.50615e+07	7.97926e+07	0.0619155	8.35801e+07	8.72583e+07	8.60208e+07	8.56198e+07	0.0178481
P49411	TUFM	Elongation factor Tu, mitochondrial	22	21	0.328066	0.0620517		27.1604	27.189	27.4154	27.5754	27.7581	27.4154	1.53038e+08	1.52655e+08	1.43751e+08	1.49815e+08	0.0286393	1.4843e+08	1.57793e+08	1.53031e+08	1.53085e+08	0.0249722	1.74631e+08	1.7641e+08	1.85765e+08	1.78936e+08	0.0272928	1.97028e+08	2.10545e+08	1.92942e+08	2.00172e+08	0.0375782	2.12228e+08	2.23227e+08	2.44741e+08	2.26732e+08	0.0595526	1.71792e+08	1.75121e+08	1.89833e+08	1.78915e+08	0.0438099
Q9C0B1	FTO	Alpha-ketoglutarate-dependent dioxygenase FTO	4	4	0.523563	0.0622641		19.8891	19.7923	19.668	20.3645	19.9459	20.6096	978470	968386	965689	970848	0.00566576	566454	1.38227e+06	773787	907502	0.381503	800706	917116	781237	833020	0.0720195	1.68328e+06	1.20043e+06	1.16592e+06	1.34988e+06	0.174961	959848	1.19079e+06	872329	1.00766e+06	0.133314	1.74361e+06	1.38487e+06	1.67476e+06	1.60108e+06	0.0970886
Q9Y4P3	TBL2	Transducin beta-like protein 2	2	2	-0.317333	0.062289		23.449	23.5623	23.2534	23.2472	23.1112	22.9543	1.13376e+07	1.13391e+07	1.16774e+07	1.14514e+07	0.0139584	1.27092e+07	1.32252e+07	1.12251e+07	1.23865e+07	0.0684467	1.02895e+07	9.445e+06	1.02627e+07	9.99909e+06	0.039199	8.30377e+06	1.23551e+07	9.20982e+06	9.95625e+06	0.174377	8.06684e+06	8.96304e+06	1.01528e+07	9.06089e+06	0.0942945	6.82399e+06	8.91309e+06	8.64328e+06	8.12679e+06	0.114163
P62873	GNB1	Guanine nucleotide-binding protein G(I)/G(S)/G(T) subunit beta-1	8	4	0.24641	0.0623028		27.1312	26.9428	26.9539	27.3578	27.2979	27.1115	1.45949e+08	1.48193e+08	1.47131e+08	1.47091e+08	0.00623104	1.29916e+08	1.31221e+08	1.25607e+08	1.28915e+08	0.0186059	1.27738e+08	1.29324e+08	1.31564e+08	1.29542e+08	0.0121132	1.77633e+08	1.72807e+08	1.64921e+08	1.71787e+08	0.0305003	1.53157e+08	1.64465e+08	1.7772e+08	1.65114e+08	0.0607969	1.37768e+08	1.49984e+08	1.48029e+08	1.4526e+08	0.0368819
Q9NR45	NANS	Sialic acid synthase	5	5	-0.26041	0.062521		23.9827	24.1002	23.7934	23.7934	23.6348	23.6667	1.53693e+07	1.71812e+07	1.71795e+07	1.65767e+07	0.0515016	1.81912e+07	1.77794e+07	1.79807e+07	1.79838e+07	0.00934885	1.46772e+07	1.39015e+07	1.50367e+07	1.45385e+07	0.0325828	1.41632e+07	1.40069e+07	1.54468e+07	1.4539e+07	0.0443716	1.2257e+07	1.32991e+07	1.35207e+07	1.30256e+07	0.0422998	1.25638e+07	1.39301e+07	1.34558e+07	1.33166e+07	0.0425357
P14868	DARS1	Aspartate--tRNA ligase, cytoplasmic	5	5	-0.462107	0.0629494		22.9957	22.665	22.3803	22.1557	22.2317	22.2673	8.88614e+06	8.57125e+06	7.6336e+06	8.36366e+06	0.0636083	4.88015e+06	7.05775e+06	8.01259e+06	6.65016e+06	0.197121	5.81466e+06	4.63441e+06	5.92887e+06	5.45931e+06	0.107185	4.90617e+06	3.91484e+06	5.19551e+06	4.67217e+06	0.117373	3.86505e+06	6.17429e+06	4.73573e+06	4.92502e+06	0.193339	4.64838e+06	5.21894e+06	5.27651e+06	5.04795e+06	0.0561632
P17568	NDUFB7	NADH dehydrogenase [ubiquinone] 1 beta subcomplex subunit 7	3	3	-0.243341	0.0630246		21.2772	21.1701	21.2325	21.1563	20.8534	20.9401	3.12684e+06	2.46677e+06	2.03081e+06	2.54147e+06	0.177284	3.02092e+06	1.99674e+06	2.06105e+06	2.35957e+06	0.198503	2.45726e+06	2.5542e+06	2.38016e+06	2.46387e+06	0.0289011	2.14139e+06	2.68043e+06	2.18946e+06	2.33709e+06	0.104217	1.77009e+06	2.00268e+06	1.91067e+06	1.89448e+06	0.0504865	2.22634e+06	1.93248e+06	1.87694e+06	2.01192e+06	0.076198
Q8TAE8	GADD45GIP1	Growth arrest and DNA damage-inducible proteins-interacting protein 1	3	3	0.290747	0.0630534		21.9207	21.8269	22.0756	22.2905	22.3457	22.0592	4.22986e+06	3.62565e+06	4.05525e+06	3.97025e+06	0.0639459	3.7784e+06	2.98841e+06	4.40628e+06	3.72437e+06	0.15576	4.38303e+06	4.33691e+06	4.54053e+06	4.42016e+06	0.0197221	4.44714e+06	5.75121e+06	5.20193e+06	5.13343e+06	0.104138	5.12692e+06	4.62515e+06	6.24106e+06	5.33104e+06	0.126672	4.04218e+06	4.37875e+06	4.6905e+06	4.37048e+06	0.0605742
Q14573	ITPR3	Inositol 1,4,5-trisphosphate receptor type 3	7	6	0.715879	0.0633512		22.4775	21.8191	22.1332	22.9654	23.1519	22.4601	5.35313e+06	6.01301e+06	6.14077e+06	5.83564e+06	0.0591444	3.82877e+06	3.03607e+06	4.22283e+06	3.69589e+06	0.133532	4.3401e+06	4.378e+06	5.09282e+06	4.60364e+06	0.0752117	7.72052e+06	7.73819e+06	9.11556e+06	8.19142e+06	0.0797794	8.44321e+06	9.93118e+06	9.58469e+06	9.3197e+06	0.0682108	5.94517e+06	6.11561e+06	5.25738e+06	5.77272e+06	0.0642653
P07942	LAMB1	Laminin subunit beta-1	5	5	-0.891685	0.063563		21.7365	22.5084	22.4787	21.0161	21.2107	21.8217	2.79311e+06	3.68039e+06	4.00885e+06	3.49412e+06	0.146963	5.43319e+06	6.02162e+06	6.44436e+06	5.96639e+06	0.0694981	5.28439e+06	6.47113e+06	5.77819e+06	5.84457e+06	0.083283	1.62454e+06	2.40655e+06	2.33117e+06	2.12075e+06	0.166083	2.16309e+06	2.41335e+06	2.70438e+06	2.42694e+06	0.0911386	3.22175e+06	3.92546e+06	3.9727e+06	3.70664e+06	0.0926463
P82930	MRPS34	28S ribosomal protein S34, mitochondrial	2	2	0.440455	0.0636636		19.0102	18.4854	18.8697	19.2442	19.3473	19.0951	511624	602323	471480	528476	0.103561	475873	282041	341749	366554	0.221119	522890	474103	440494	479162	0.070598	675737	646615	541819	621390	0.0925467	834713	589088	576144	666648	0.178441	569125	643702	467627	560151	0.128826
Q9NTX5	ECHDC1	Ethylmalonyl-CoA decarboxylase	2	2	-0.30213	0.063697		22.2448	22.5183	22.1745	21.9016	22.0437	22.0858	4.42095e+06	4.75688e+06	5.73156e+06	4.9698e+06	0.111842	6.29236e+06	5.43896e+06	6.29034e+06	6.00722e+06	0.0668899	4.60229e+06	4.82868e+06	4.76941e+06	4.73346e+06	0.0202505	3.1681e+06	4.58541e+06	3.99982e+06	3.91778e+06	0.14843	3.33806e+06	4.93651e+06	4.69514e+06	4.32323e+06	0.162739	4.50422e+06	4.01994e+06	4.82987e+06	4.45134e+06	0.0747543
Q14498	RBM39	RNA-binding protein 39	7	7	0.0987415	0.063742		23.7389	23.8288	23.867	23.9134	23.895	23.9225	1.44903e+07	1.33993e+07	1.41298e+07	1.40065e+07	0.032405	1.35358e+07	1.50032e+07	1.60742e+07	1.48711e+07	0.0699667	1.46875e+07	1.49106e+07	1.64389e+07	1.53456e+07	0.0507232	1.77111e+07	1.58981e+07	1.38853e+07	1.58315e+07	0.0987016	1.56057e+07	1.52938e+07	1.5996e+07	1.56318e+07	0.0183764	1.54934e+07	1.66974e+07	1.54615e+07	1.58841e+07	0.0362133
Q92896	GLG1	Golgi apparatus protein 1	14	14	-0.182748	0.0638402		25.9065	25.9897	25.8297	25.7989	25.7608	25.618	6.44808e+07	6.20832e+07	6.21314e+07	6.28984e+07	0.0177912	6.79406e+07	6.62268e+07	6.57286e+07	6.6632e+07	0.0142187	5.68924e+07	5.8883e+07	6.31389e+07	5.96381e+07	0.0436869	5.55347e+07	5.67634e+07	6.28392e+07	5.83791e+07	0.0547013	5.49975e+07	5.52921e+07	6.02781e+07	5.68559e+07	0.0426137	4.89088e+07	5.48518e+07	5.07281e+07	5.14962e+07	0.0482804
P10620	MGST1	Microsomal glutathione S-transferase 1	7	7	0.731874	0.0639412		24.5225	24.391	23.7695	25.2961	24.7441	24.8385	2.48191e+07	2.48391e+07	2.2787e+07	2.41484e+07	0.0398659	2.62087e+07	2.11562e+07	1.86903e+07	2.20184e+07	0.142124	1.4955e+07	1.43382e+07	1.35344e+07	1.42758e+07	0.0407422	4.85505e+07	4.05395e+07	3.44224e+07	4.11708e+07	0.140513	4.05238e+07	2.52283e+07	1.8606e+07	2.81194e+07	0.326409	3.33552e+07	2.9416e+07	2.73635e+07	3.00449e+07	0.0827502
O14653	GOSR2	Golgi SNAP receptor complex member 2	3	3	-0.356972	0.0639703		21.7926	21.6889	21.3953	21.3238	21.3614	21.1207	3.22147e+06	3.74964e+06	3.92709e+06	3.63273e+06	0.0824976	3.418e+06	3.82674e+06	2.89746e+06	3.38073e+06	0.112487	2.85756e+06	2.35262e+06	3.06445e+06	2.75821e+06	0.108395	2.51561e+06	2.28296e+06	3.07597e+06	2.62485e+06	0.126801	1.967e+06	3.06822e+06	3.0475e+06	2.69424e+06	0.19089	1.71815e+06	2.60418e+06	2.51797e+06	2.2801e+06	0.174955
P40939	HADHA	Trifunctional enzyme subunit alpha, mitochondrial	35	33	0.327352	0.0640034		29.2535	29.249	29.4938	29.7325	29.7849	29.461	6.30124e+08	6.37959e+08	6.51694e+08	6.39926e+08	0.0139314	6.46104e+08	6.21056e+08	6.47678e+08	6.38279e+08	0.0191068	7.47498e+08	7.40364e+08	7.79216e+08	7.55693e+08	0.022346	8.77316e+08	8.96242e+08	9.03329e+08	8.92296e+08	0.0123056	8.89689e+08	9.2406e+08	9.6107e+08	9.2494e+08	0.0315132	7.13889e+08	7.38061e+08	7.63625e+08	7.38525e+08	0.0274969
Q9H9B4	SFXN1	Sideroflexin-1	5	4	0.243979	0.0642664		23.48	23.3376	23.632	23.7182	23.8093	23.654	1.26798e+07	1.17779e+07	1.06509e+07	1.17028e+07	0.0709219	1.13581e+07	1.13237e+07	8.99977e+06	1.05605e+07	0.104513	1.32927e+07	1.23226e+07	1.33645e+07	1.29933e+07	0.0365668	1.47632e+07	1.35458e+07	1.30682e+07	1.37924e+07	0.0517385	1.62593e+07	1.41486e+07	1.37776e+07	1.47285e+07	0.0742092	1.41083e+07	1.22183e+07	1.32322e+07	1.31863e+07	0.0585659
Q13325	IFIT5	Interferon-induced protein with tetratricopeptide repeats 5	2	2	-0.528739	0.0642833		19.3459	18.7243	18.8519	18.4873	18.2781	18.5704	744177	576096	678740	666337	0.103817	555381	301163	442758	433101	0.240148	516434	454702	448243	473126	0.0649651	516744	349025	236694	367488	0.313134	384342	274806	294509	317886	0.149976	449081	509493	209225	389267	0.333127
P54577	YARS1	Tyrosine--tRNA ligase, cytoplasmic	9	8	-0.648302	0.0644624		24.1253	24.6116	23.7686	23.6238	23.3714	23.5653	1.698e+07	1.99035e+07	1.80143e+07	1.82992e+07	0.0661443	2.4949e+07	2.61832e+07	2.57724e+07	2.56349e+07	0.0200184	1.42161e+07	1.35831e+07	1.50733e+07	1.42908e+07	0.0427304	1.23858e+07	1.27329e+07	1.36606e+07	1.29264e+07	0.0416276	1.00407e+07	1.17772e+07	1.07371e+07	1.08517e+07	0.0657504	1.24116e+07	1.22539e+07	1.2573e+07	1.24128e+07	0.0104952
P30042	#N/A	ES1 protein homolog, mitochondrial	7	7	0.349599	0.0644828		25.8599	25.9361	26.0854	26.1507	26.5478	26.2317	5.99201e+07	5.67996e+07	6.5945e+07	6.08883e+07	0.062341	6.0287e+07	6.61103e+07	6.62627e+07	6.422e+07	0.0433161	6.79482e+07	6.88894e+07	7.6753e+07	7.11968e+07	0.0554453	7.60085e+07	7.31271e+07	7.44657e+07	7.45338e+07	0.0157953	9.6718e+07	9.95425e+07	9.81709e+07	9.81438e+07	0.0117509	7.30289e+07	8.13452e+07	8.19798e+07	7.87846e+07	0.0517635
P54289	CACNA2D1	Voltage-dependent calcium channel subunit alpha-2/delta-1	7	6	-0.448828	0.0647186		23.2121	23.4296	23.1657	22.859	23.0721	22.5298	9.45158e+06	9.84021e+06	9.86025e+06	9.71735e+06	0.0193575	1.22905e+07	1.04078e+07	1.11955e+07	1.12979e+07	0.0683321	1.03498e+07	7.92771e+06	9.9506e+06	9.40937e+06	0.112684	7.57196e+06	8.05941e+06	7.19118e+06	7.60751e+06	0.0467092	8.60773e+06	9.09118e+06	8.75575e+06	8.81822e+06	0.0229354	6.925e+06	5.66081e+06	5.58074e+06	6.05552e+06	0.101674
P0C0S5;Q71UI9	#N/A	Histone H2A.Z	4	4	0.333775	0.0647411		25.2821	25.558	25.6595	25.7024	25.9338	25.8647	4.31204e+07	4.12365e+07	3.80051e+07	4.07873e+07	0.0517882	4.63657e+07	5.6472e+07	4.52188e+07	4.93522e+07	0.102452	5.60756e+07	4.86721e+07	5.42949e+07	5.30142e+07	0.0595165	5.57388e+07	5.71442e+07	5.0978e+07	5.46203e+07	0.0483092	7.07885e+07	6.15238e+07	6.00402e+07	6.41175e+07	0.0741734	6.33592e+07	5.96174e+07	6.03823e+07	6.11196e+07	0.0264091
P62847	RPS24	40S ribosomal protein S24	8	8	-0.215525	0.0647953		27.0715	27.112	26.982	26.9658	26.8503	26.7028	1.42867e+08	1.39699e+08	1.40538e+08	1.41035e+08	0.00950331	1.43199e+08	1.45806e+08	1.46166e+08	1.45057e+08	0.00911458	1.29566e+08	1.29938e+08	1.38158e+08	1.32554e+08	0.0299176	1.31911e+08	1.23946e+08	1.37369e+08	1.31075e+08	0.0420512	1.15469e+08	1.18958e+08	1.2854e+08	1.20989e+08	0.0456746	1.00453e+08	1.11781e+08	1.15463e+08	1.09232e+08	0.0584734
Q96AQ6	PBXIP1	Pre-B-cell leukemia transcription factor-interacting protein 1	4	4	0.399574	0.0649786		21.5823	21.953	21.9672	22.3211	22.3376	22.0426	2.4029e+06	3.19727e+06	3.80885e+06	3.13634e+06	0.183524	3.78666e+06	3.42292e+06	4.98075e+06	4.06344e+06	0.163756	3.91702e+06	3.87857e+06	4.50426e+06	4.09995e+06	0.0698352	4.40345e+06	5.64345e+06	5.67259e+06	5.23983e+06	0.112891	5.02458e+06	5.26586e+06	5.598e+06	5.29615e+06	0.0443862	4.63866e+06	4.2455e+06	4.08845e+06	4.32421e+06	0.0535154
P20042	EIF2S2	Eukaryotic translation initiation factor 2 subunit 2	8	7	-0.283583	0.0653788		24.8827	24.8962	24.6735	24.7038	24.4216	24.4762	2.96653e+07	3.25149e+07	3.06233e+07	3.09345e+07	0.0382733	3.20854e+07	3.02615e+07	3.13279e+07	3.12249e+07	0.0239605	2.68742e+07	2.62778e+07	2.71241e+07	2.67587e+07	0.0132675	2.68309e+07	2.78596e+07	2.7292e+07	2.73275e+07	0.0153952	2.12286e+07	2.38701e+07	2.23164e+07	2.24717e+07	0.0482373	2.46581e+07	2.29339e+07	2.24235e+07	2.33385e+07	0.040965
P00325	ADH1B	Alcohol dehydrogenase 1B	13	11	-0.848448	0.0656219		27.5567	28.5284	28.424	27.0511	27.4987	27.414	2.0441e+08	1.96996e+08	1.90859e+08	1.97422e+08	0.0280642	3.79239e+08	3.91211e+08	3.91086e+08	3.87179e+08	0.0145002	3.63987e+08	3.56802e+08	3.59634e+08	3.60141e+08	0.0082059	1.41648e+08	1.36783e+08	1.38727e+08	1.39052e+08	0.0143782	1.99285e+08	1.89743e+08	1.79884e+08	1.89637e+08	0.0417679	1.76695e+08	1.80337e+08	1.7947e+08	1.78834e+08	0.00868599
O95573	ACSL3	Long-chain-fatty-acid--CoA ligase 3	12	10	0.440541	0.0656321		24.4105	24.3031	24.1565	24.8433	24.9316	24.417	2.40264e+07	2.17806e+07	2.10567e+07	2.22879e+07	0.0567282	2.21033e+07	2.07417e+07	1.91431e+07	2.06627e+07	0.0585502	1.806e+07	1.91388e+07	1.87899e+07	1.86629e+07	0.0240829	2.93555e+07	3.12832e+07	2.95522e+07	3.00636e+07	0.0288081	3.03077e+07	3.22933e+07	3.33144e+07	3.19718e+07	0.0390454	2.21326e+07	2.31727e+07	2.19907e+07	2.2432e+07	0.0234904
O94973	AP2A2	AP-2 complex subunit alpha-2	13	9	0.258958	0.0657834		24.2021	24.3712	24.1332	24.6375	24.4614	24.3844	1.82335e+07	1.86108e+07	2.09974e+07	1.92806e+07	0.0634683	2.31759e+07	2.03183e+07	2.1644e+07	2.17127e+07	0.0537759	1.84248e+07	1.80813e+07	1.87899e+07	1.8432e+07	0.0156974	2.28215e+07	2.7344e+07	2.81932e+07	2.61196e+07	0.0902655	2.05133e+07	2.3737e+07	2.51605e+07	2.31369e+07	0.0840254	2.3303e+07	2.07059e+07	2.16108e+07	2.18732e+07	0.0492105
Q49A26	GLYR1	Putative oxidoreductase GLYR1	3	3	0.392646	0.0658845		20.8423	21.2243	21.002	21.4425	21.5915	21.2125	1.81531e+06	1.86085e+06	1.97854e+06	1.8849e+06	0.0364862	3.11294e+06	1.70982e+06	2.52864e+06	2.45047e+06	0.234845	2.02067e+06	2.11367e+06	2.16071e+06	2.09835e+06	0.0277317	2.59367e+06	2.78801e+06	3.18117e+06	2.85429e+06	0.0856183	2.66864e+06	3.90603e+06	2.91273e+06	3.16246e+06	0.169216	2.35883e+06	2.41855e+06	2.52384e+06	2.43374e+06	0.0280283
Q16610	ECM1	Extracellular matrix protein 1	9	9	0.539124	0.0659584		24.0526	23.5285	23.895	24.2961	24.6486	24.1488	1.85209e+07	1.75246e+07	1.60063e+07	1.73506e+07	0.0595911	1.20855e+07	1.26557e+07	1.14127e+07	1.20513e+07	0.0421536	1.56081e+07	1.58541e+07	1.52054e+07	1.55559e+07	0.0171884	2.19533e+07	2.03975e+07	1.93957e+07	2.05822e+07	0.0511243	2.63601e+07	2.62971e+07	2.62773e+07	2.63115e+07	0.00134233	1.73389e+07	1.93509e+07	1.91535e+07	1.86144e+07	0.0486483
P61758	VBP1	Prefoldin subunit 3	2	2	-0.259845	0.0659881		22.942	22.9757	22.6527	22.5695	22.6163	22.605	6.75577e+06	8.93556e+06	8.48247e+06	8.05793e+06	0.116551	9.06528e+06	7.47026e+06	8.20946e+06	8.24833e+06	0.0790152	6.76895e+06	6.36289e+06	6.6494e+06	6.59374e+06	0.0258397	5.9833e+06	6.41574e+06	6.27349e+06	6.22418e+06	0.0289119	7.10967e+06	6.04997e+06	6.12952e+06	6.42972e+06	0.0749478	6.54474e+06	5.99102e+06	6.60262e+06	6.37946e+06	0.0432137
P42126	ECI1	Enoyl-CoA delta isomerase 1, mitochondrial	4	4	0.628262	0.0660148		24.0526	24.5165	24.0854	24.7745	25.2243	24.5404	1.74205e+07	1.72953e+07	1.75891e+07	1.7435e+07	0.00690351	2.26337e+07	2.43975e+07	2.5002e+07	2.40111e+07	0.0418434	1.70952e+07	1.73035e+07	1.91498e+07	1.78495e+07	0.0517323	2.72648e+07	2.87942e+07	3.00513e+07	2.87034e+07	0.0396952	3.64221e+07	3.93225e+07	4.18581e+07	3.92009e+07	0.0566545	2.31407e+07	2.51533e+07	2.50159e+07	2.44366e+07	0.037569
P31937	HIBADH	3-hydroxyisobutyrate dehydrogenase, mitochondrial	13	12	0.51989	0.0664682		26.7389	26.317	26.5898	27.0084	27.3828	26.8142	1.08745e+08	1.13123e+08	1.13463e+08	1.11777e+08	0.0192198	8.37331e+07	8.50412e+07	8.19585e+07	8.35776e+07	0.0151152	1.01915e+08	9.70112e+07	1.03188e+08	1.00705e+08	0.0264447	1.31616e+08	1.36379e+08	1.36961e+08	1.34985e+08	0.0177384	1.61842e+08	1.73176e+08	1.88608e+08	1.74542e+08	0.0628483	1.14589e+08	1.17745e+08	1.20844e+08	1.17726e+08	0.0216903
Q01995	TAGLN	Transgelin	6	6	-1.56167	0.0665221	+	26.6448	25.8449	24.5548	24.1589	24.3331	23.8674	1.02404e+08	1.03296e+08	1.09079e+08	1.04926e+08	0.0282022	5.65256e+07	6.34032e+07	6.08736e+07	6.02674e+07	0.0471278	2.26753e+07	2.46885e+07	2.65707e+07	2.46449e+07	0.0645399	1.85338e+07	1.85103e+07	1.91499e+07	1.87313e+07	0.0158101	2.21273e+07	2.19379e+07	1.93372e+07	2.11342e+07	0.0602321	1.53066e+07	1.50195e+07	1.55867e+07	1.53043e+07	0.0151288
Q9BWF3	RBM4	RNA-binding protein 4	3	3	-0.27581	0.0665606		22.2047	22.2561	22.1913	22.0484	21.7248	22.0515	5.16915e+06	4.60046e+06	4.73192e+06	4.83384e+06	0.05029	4.25795e+06	5.79258e+06	4.97686e+06	5.00913e+06	0.125156	4.63042e+06	4.58541e+06	5.15133e+06	4.78906e+06	0.0536279	4.86449e+06	4.11431e+06	4.03377e+06	4.33752e+06	0.0862404	4.55929e+06	2.80925e+06	3.02892e+06	3.46582e+06	0.224589	4.13501e+06	3.88521e+06	5.02034e+06	4.34686e+06	0.112041
Q9UMY4	SNX12	Sorting nexin-12	2	2	0.306346	0.0665734		20.9951	21.1015	21.3376	21.5404	21.4972	21.3156	2.1437e+06	1.79331e+06	2.33223e+06	2.08975e+06	0.106854	2.13804e+06	1.93472e+06	2.67392e+06	2.24889e+06	0.138641	2.03468e+06	2.77747e+06	3.14879e+06	2.65364e+06	0.174546	3.19028e+06	2.70666e+06	3.23883e+06	3.04525e+06	0.0788916	2.05175e+06	3.12854e+06	3.70604e+06	2.96211e+06	0.231435	2.04924e+06	2.90864e+06	2.87988e+06	2.61259e+06	0.152538
Q8NE71	ABCF1	ATP-binding cassette sub-family F member 1	8	8	-0.383121	0.0667437		24.2717	24.5778	24.2519	24.0835	23.7621	24.1064	1.90354e+07	2.0188e+07	2.15367e+07	2.02534e+07	0.0504715	2.49659e+07	2.54154e+07	2.474e+07	2.50404e+07	0.0112114	2.05599e+07	1.91462e+07	2.02273e+07	1.99778e+07	0.0302083	1.70324e+07	1.82265e+07	1.80711e+07	1.77767e+07	0.0298199	1.39432e+07	1.35829e+07	1.51537e+07	1.42266e+07	0.0472259	1.83748e+07	1.78908e+07	1.79175e+07	1.8061e+07	0.0122982
Q9Y676	MRPS18B	28S ribosomal protein S18b, mitochondrial	2	2	0.335583	0.0667896		20.5165	20.2989	20.7389	20.7955	20.9388	20.8269	1.54527e+06	1.45797e+06	1.50422e+06	1.50249e+06	0.0237362	1.45209e+06	1.37819e+06	1.05218e+06	1.29415e+06	0.134251	1.93843e+06	1.76799e+06	1.5562e+06	1.7542e+06	0.0891288	2.14062e+06	1.80054e+06	1.50816e+06	1.81644e+06	0.14228	2.39941e+06	1.86882e+06	1.77444e+06	2.01423e+06	0.136568	2.01505e+06	1.90309e+06	1.65695e+06	1.85837e+06	0.0804873
P50502;Q8IZP2;Q8NFI4	#N/A	Hsc70-interacting protein	5	5	-0.303514	0.0668813		24.5245	24.7852	24.5255	24.3734	24.1395	24.4118	2.32608e+07	2.57712e+07	2.33678e+07	2.41333e+07	0.0480266	2.76077e+07	2.95282e+07	2.96017e+07	2.89125e+07	0.0319291	2.458e+07	2.3228e+07	2.46415e+07	2.41498e+07	0.0270117	2.34877e+07	2.12736e+07	2.04373e+07	2.17329e+07	0.0592179	1.89322e+07	1.90023e+07	1.75084e+07	1.8481e+07	0.0372433	2.31476e+07	2.18436e+07	2.19655e+07	2.23189e+07	0.0263493
Q03426	MVK	Mevalonate kinase	2	2	0.888154	0.0669754		19.5394	19.3386	18.4252	20.1704	19.9459	19.8515	785094	704125	797506	762242	0.0543216	565520	900623	524112	663418	0.254106	368122	309988	376406	351505	0.0840705	1.20924e+06	1.13849e+06	1.20469e+06	1.18414e+06	0.0273062	940675	1.27326e+06	825816	1.01325e+06	0.187258	1.00102e+06	951687	884616	945775	0.0504407
Q96CV9	OPTN	Optineurin	2	2	0.448942	0.0670577		20.8727	20.3645	20.5165	20.9388	21.2302	20.9316	2.02502e+06	2.06111e+06	1.66855e+06	1.91823e+06	0.0923561	1.25971e+06	1.32262e+06	1.46607e+06	1.34947e+06	0.063993	1.47959e+06	1.60743e+06	1.41204e+06	1.49969e+06	0.0540275	2.15873e+06	1.98661e+06	1.88306e+06	2.00947e+06	0.0565805	2.39213e+06	2.47251e+06	2.50983e+06	2.45816e+06	0.0199801	1.92774e+06	2.00106e+06	2.0606e+06	1.99647e+06	0.0272166
Q86UE4	MTDH	Protein LYRIC	11	11	0.261586	0.067089		25.9584	25.6838	25.7312	26.1661	26.038	25.9539	6.85277e+07	6.49371e+07	6.22639e+07	6.52429e+07	0.0393346	5.22838e+07	5.41434e+07	5.5342e+07	5.3923e+07	0.0233331	5.61372e+07	5.24908e+07	5.85408e+07	5.57229e+07	0.0446349	7.60375e+07	7.17528e+07	7.82452e+07	7.53452e+07	0.0357731	7.48116e+07	6.48747e+07	6.70592e+07	6.89152e+07	0.0618691	6.43608e+07	6.24874e+07	6.80878e+07	6.49787e+07	0.0358228
P60981	DSTN	Destrin	5	5	-0.235914	0.0671103		26.1714	26.1223	25.9359	25.7944	25.9626	25.7649	7.45272e+07	7.71182e+07	7.50856e+07	7.5577e+07	0.0147317	7.53302e+07	6.92776e+07	7.45292e+07	7.30457e+07	0.0367501	6.38468e+07	6.36577e+07	6.5072e+07	6.41922e+07	0.00976616	5.41294e+07	6.06266e+07	5.98299e+07	5.81953e+07	0.0497181	6.62976e+07	6.80932e+07	6.1785e+07	6.53919e+07	0.0405818	5.94924e+07	5.61882e+07	5.53696e+07	5.70167e+07	0.0312572
Q9Y333	LSM2	U6 snRNA-associated Sm-like protein LSm2	3	3	0.22069	0.0672185		22.5189	22.7286	22.5069	22.9079	22.7634	22.7451	6.19615e+06	6.5355e+06	5.30544e+06	6.01236e+06	0.0862745	7.33297e+06	7.24775e+06	6.26911e+06	6.94994e+06	0.0694507	5.59201e+06	5.91531e+06	6.37725e+06	5.96153e+06	0.0540518	8.09324e+06	8.29592e+06	7.23113e+06	7.87343e+06	0.058634	7.53901e+06	6.47464e+06	7.35074e+06	7.12146e+06	0.0651254	6.86589e+06	8.05553e+06	6.18179e+06	7.0344e+06	0.110056
Q99519	NEU1	Sialidase-1	3	3	-0.938819	0.0674401		21.2799	21.6233	22.3582	20.8036	20.4703	21.171	2.07086e+06	2.83795e+06	2.72988e+06	2.54623e+06	0.133147	3.22552e+06	2.73344e+06	3.73249e+06	3.23048e+06	0.126259	4.98627e+06	4.99107e+06	6.1513e+06	5.37621e+06	0.101944	1.84736e+06	1.49984e+06	2.14368e+06	1.83029e+06	0.143759	1.48937e+06	938697	1.93001e+06	1.45269e+06	0.27916	2.48787e+06	1.74384e+06	2.85149e+06	2.36107e+06	0.195251
O75439	PMPCB	Mitochondrial-processing peptidase subunit beta	4	4	0.327	0.0678604		22.7348	22.9864	22.9882	23.3101	23.3511	23.0292	7.49935e+06	6.45718e+06	6.97301e+06	6.97651e+06	0.0609863	9.60948e+06	7.62961e+06	7.69768e+06	8.31226e+06	0.110403	7.88608e+06	8.27032e+06	8.81456e+06	8.32366e+06	0.0457637	9.93158e+06	1.104e+07	1.02734e+07	1.0415e+07	0.0444997	9.63527e+06	1.03442e+07	1.21771e+07	1.07189e+07	0.099915	8.62234e+06	8.91235e+06	8.14166e+06	8.55878e+06	0.0371346
O95319	CELF2	CUGBP Elav-like family member 2	5	5	0.874959	0.0678996		21.9566	22.6209	23.155	23.5522	23.3376	23.4676	3.80473e+06	4.42265e+06	3.9747e+06	4.06736e+06	0.0640794	6.84548e+06	6.75541e+06	5.7513e+06	6.45073e+06	0.0768809	9.81502e+06	8.33498e+06	9.85622e+06	9.33541e+06	0.0757987	1.31056e+07	1.23918e+07	1.14778e+07	1.23251e+07	0.0540523	1.11965e+07	9.58633e+06	1.10083e+07	1.0597e+07	0.0678293	1.20617e+07	1.1621e+07	1.10629e+07	1.15819e+07	0.0352888
Q9H0D6	XRN2	5'-3' exoribonuclease 2	5	4	0.445408	0.0684399		22.2096	22.5662	22.2989	23.0224	22.5309	22.8576	5.00036e+06	5.05516e+06	4.49941e+06	4.85164e+06	0.0515437	6.3602e+06	6.00233e+06	6.27259e+06	6.2117e+06	0.0245197	5.30159e+06	5.25414e+06	4.93776e+06	5.16449e+06	0.0312701	6.92565e+06	9.38711e+06	9.25673e+06	8.52316e+06	0.132682	4.96918e+06	6.49394e+06	6.72164e+06	6.06159e+06	0.128353	7.13188e+06	7.72108e+06	7.93569e+06	7.59622e+06	0.0447359
P11413	G6PD	Glucose-6-phosphate 1-dehydrogenase	17	16	-0.210283	0.06846		26.633	26.73	26.4868	26.4806	26.4192	26.3191	1.01491e+08	1.09813e+08	1.00906e+08	1.0407e+08	0.0390886	1.10181e+08	1.15145e+08	1.08595e+08	1.11307e+08	0.0250646	8.87386e+07	9.48253e+07	9.85603e+07	9.40414e+07	0.043043	9.11316e+07	9.60667e+07	9.37156e+07	9.3638e+07	0.0215244	8.63657e+07	8.92691e+07	9.35717e+07	8.97355e+07	0.0329889	8.26938e+07	8.45884e+07	8.38869e+07	8.3723e+07	0.00934162
P62191	PSMC1	26S protease regulatory subunit 4	6	6	-0.220795	0.0688438		24.5168	24.3502	24.2529	24.0968	24.2421	24.1187	2.32356e+07	2.46452e+07	2.41329e+07	2.40046e+07	0.024269	2.19394e+07	2.17097e+07	2.0509e+07	2.13861e+07	0.0293272	2.03937e+07	2.01539e+07	1.9429e+07	1.99922e+07	0.0205138	1.76209e+07	1.836e+07	1.78421e+07	1.7941e+07	0.017264	1.96776e+07	1.89242e+07	2.09249e+07	1.98422e+07	0.0415783	1.73061e+07	1.89755e+07	1.83661e+07	1.82159e+07	0.0378651
Q9UMS4	PRPF19	Pre-mRNA-processing factor 19	10	10	0.0545807	0.0688875		25.8552	25.8764	25.8215	25.9316	25.8788	25.9066	6.28991e+07	6.15424e+07	5.75745e+07	6.0672e+07	0.0372363	6.1185e+07	6.28029e+07	6.07547e+07	6.15809e+07	0.0143192	6.13719e+07	5.73126e+07	5.92995e+07	5.9328e+07	0.0279355	6.9905e+07	6.18746e+07	6.03021e+07	6.40272e+07	0.0656827	6.73642e+07	5.90359e+07	5.87286e+07	6.17096e+07	0.0648259	6.0592e+07	6.19186e+07	6.62706e+07	6.29271e+07	0.0385441
Q7KZF4	SND1	Staphylococcal nuclease domain-containing protein 1	32	32	-0.217474	0.0689044		28.5121	28.3955	28.4925	28.4095	28.1789	28.1594	3.71624e+08	3.90345e+08	3.86503e+08	3.82824e+08	0.0210889	3.56519e+08	3.54859e+08	3.4795e+08	3.5311e+08	0.010508	3.80691e+08	3.73449e+08	3.78796e+08	3.77645e+08	0.00812005	3.61958e+08	3.46433e+08	3.61207e+08	3.56533e+08	0.020049	2.98477e+08	3.05003e+08	3.08124e+08	3.03868e+08	0.0132276	2.9319e+08	2.98854e+08	3.07311e+08	2.99785e+08	0.0193563
P55287	CDH11	Cadherin-11	5	5	-0.744442	0.0689654		23.6815	24.2373	23.2167	23.0868	22.9358	22.8796	1.39709e+07	1.41058e+07	1.22852e+07	1.3454e+07	0.0615633	1.94345e+07	1.92004e+07	2.06935e+07	1.97762e+07	0.0331544	9.57295e+06	9.66396e+06	1.00071e+07	9.74802e+06	0.0191791	8.76683e+06	8.59257e+06	9.3669e+06	8.90877e+06	0.0372296	8.17522e+06	7.53931e+06	8.35552e+06	8.02335e+06	0.0436344	8.02141e+06	6.90059e+06	8.22838e+06	7.71679e+06	0.0755879
O95864	FADS2	Fatty acid desaturase 2	3	3	0.382202	0.0694421		20.6006	20.5261	20.4273	21.0088	21.0821	20.6096	1.74192e+06	1.52365e+06	1.49052e+06	1.58536e+06	0.0703463	1.41181e+06	1.49124e+06	1.63106e+06	1.51137e+06	0.0599665	1.68318e+06	1.24425e+06	1.29695e+06	1.40813e+06	0.138965	2.44024e+06	2.30785e+06	1.58464e+06	2.11091e+06	0.178137	2.30137e+06	2.21788e+06	2.13378e+06	2.21768e+06	0.0308509	1.4856e+06	1.70295e+06	1.61899e+06	1.60251e+06	0.0558469
Q04760	GLO1	Lactoylglutathione lyase	6	6	0.246068	0.0696997		24.4041	24.5225	24.6703	24.7338	24.9043	24.6971	2.11583e+07	2.20828e+07	2.33058e+07	2.21823e+07	0.03965	2.26255e+07	2.24402e+07	2.71042e+07	2.40566e+07	0.0896341	2.56488e+07	2.70512e+07	2.73319e+07	2.66773e+07	0.0275985	2.64546e+07	2.99382e+07	2.72445e+07	2.78791e+07	0.0534913	2.67808e+07	3.58285e+07	3.16248e+07	3.14113e+07	0.117689	2.84304e+07	2.61563e+07	2.71024e+07	2.72297e+07	0.0342552
Q9BUQ8	DDX23	Probable ATP-dependent RNA helicase DDX23	2	2	0.566533	0.0701172		19.1531	18.7923	19.562	19.6417	19.853	19.7123	606038	655021	489387	583482	0.11907	398863	368673	594202	453912	0.220223	776217	685737	860484	774146	0.0921728	740686	842484	869816	817662	0.0679527	805940	963256	1.07305e+06	947416	0.115706	811771	771013	993673	858819	0.11271
P17655	CAPN2	Calpain-2 catalytic subunit	22	21	0.681171	0.0701858		26.4692	27.3066	27.189	27.7064	27.8081	27.4938	9.10114e+07	9.33273e+07	9.43935e+07	9.29107e+07	0.0151953	1.68083e+08	1.61406e+08	1.69489e+08	1.66326e+08	0.0211995	1.4312e+08	1.51284e+08	1.63666e+08	1.5269e+08	0.0553188	2.04628e+08	2.29773e+08	2.22142e+08	2.18848e+08	0.0480979	2.31837e+08	2.2667e+08	2.4563e+08	2.34712e+08	0.0340966	1.86247e+08	1.8923e+08	1.90051e+08	1.88509e+08	0.00866904
Q96PK6	RBM14	RNA-binding protein 14	4	4	0.508334	0.0705669		22.928	23.2961	23.217	23.8764	23.3101	23.7796	8.24451e+06	7.78496e+06	7.89834e+06	7.97594e+06	0.0245075	1.04507e+07	1.00814e+07	1.03539e+07	1.02953e+07	0.0151844	9.49507e+06	9.67954e+06	1.009e+07	9.75488e+06	0.0254918	1.56432e+07	1.47913e+07	1.58378e+07	1.54241e+07	0.0294631	9.92803e+06	1.0827e+07	1.04349e+07	1.03967e+07	0.0353957	1.38792e+07	1.49392e+07	1.42343e+07	1.43509e+07	0.0306965
P05198	EIF2S1	Eukaryotic translation initiation factor 2 subunit 1	7	7	-0.415546	0.0705881		24.8115	24.881	24.4698	24.5302	24.1971	24.1883	2.90954e+07	2.95328e+07	2.97048e+07	2.94443e+07	0.00871214	2.80336e+07	3.33788e+07	3.12827e+07	3.08984e+07	0.0711691	2.30793e+07	2.31835e+07	2.34427e+07	2.32352e+07	0.00657547	2.27621e+07	2.41451e+07	2.57799e+07	2.4229e+07	0.0509075	1.83532e+07	1.96475e+07	1.97e+07	1.92336e+07	0.0323849	1.97509e+07	1.95399e+07	1.80592e+07	1.91167e+07	0.0393726
Q07021	C1QBP	Complement component 1 Q subcomponent-binding protein, mitochondrial	9	9	0.266139	0.070637		27.7195	27.632	27.6998	27.9316	28.141	27.7771	2.25324e+08	2.18639e+08	2.20452e+08	2.21471e+08	0.0127465	2.0939e+08	2.08063e+08	2.06077e+08	2.07843e+08	0.00655012	2.1244e+08	2.19878e+08	2.23088e+08	2.18469e+08	0.0204131	2.43073e+08	2.58641e+08	2.65896e+08	2.5587e+08	0.0372115	2.91797e+08	2.92665e+08	3.04979e+08	2.96481e+08	0.0203044	2.15082e+08	2.34205e+08	2.41415e+08	2.30234e+08	0.0482594
Q99459	CDC5L	Cell division cycle 5-like protein	6	6	0.206447	0.0708034		22.5045	22.58	22.3699	22.7975	22.6779	22.5983	6.1942e+06	5.54206e+06	6.10629e+06	5.94751e+06	0.0485817	6.67587e+06	6.4479e+06	5.6957e+06	6.27316e+06	0.0667601	5.81054e+06	4.52511e+06	5.93062e+06	5.42209e+06	0.117326	6.8134e+06	8.08747e+06	6.9675e+06	7.28946e+06	0.0778898	6.51658e+06	6.63106e+06	6.99257e+06	6.7134e+06	0.030217	6.24233e+06	6.3211e+06	6.47992e+06	6.34778e+06	0.0155667
Q6PCB7	SLC27A1	Long-chain fatty acid transport protein 1	6	6	-0.345821	0.0708587		22.6853	22.7522	22.7496	22.1679	22.6452	22.3365	7.8064e+06	6.20284e+06	6.22473e+06	6.74466e+06	0.111321	7.70923e+06	7.15663e+06	6.32818e+06	7.06468e+06	0.0803357	7.17595e+06	7.87722e+06	6.10282e+06	7.052e+06	0.103471	5.02146e+06	4.72035e+06	4.39415e+06	4.71198e+06	0.0543654	7.36752e+06	6.6466e+06	5.66567e+06	6.55993e+06	0.106323	5.56099e+06	5.70824e+06	4.61899e+06	5.29607e+06	0.0911105
P55084	HADHB	Trifunctional enzyme subunit beta, mitochondrial	20	20	0.26466	0.0709813		28.459	28.4512	28.6831	28.8173	28.9174	28.6527	3.75115e+08	3.65623e+08	3.66558e+08	3.69099e+08	0.0115722	3.65019e+08	3.75276e+08	3.61842e+08	3.67379e+08	0.0156042	4.21547e+08	4.33962e+08	4.38393e+08	4.313e+08	0.0165317	4.61162e+08	4.83234e+08	4.73731e+08	4.72709e+08	0.0191234	5.0028e+08	4.99664e+08	5.1966e+08	5.06535e+08	0.0183294	4.12418e+08	4.20794e+08	4.326e+08	4.21937e+08	0.0196212
O00505	KPNA3	Importin subunit alpha-4	5	2	0.25937	0.0712587		21.8839	21.895	21.6497	22.2066	22.0224	21.9777	2.87449e+06	4.1402e+06	4.59634e+06	3.87034e+06	0.188196	4.36739e+06	3.62668e+06	3.69473e+06	3.89627e+06	0.0857985	3.52912e+06	3.72937e+06	2.60975e+06	3.28941e+06	0.148201	3.4419e+06	5.11472e+06	5.94867e+06	4.83509e+06	0.215572	4.01241e+06	3.80977e+06	4.96605e+06	4.26274e+06	0.118268	4.81573e+06	3.97158e+06	3.5944e+06	4.12724e+06	0.123717
Q96CS3	FAF2	FAS-associated factor 2	9	9	-0.237235	0.0717316		25.1325	25.1593	24.9479	24.9041	24.9234	24.7004	3.83932e+07	3.55773e+07	3.63787e+07	3.6783e+07	0.032205	3.69646e+07	3.73627e+07	3.80861e+07	3.74711e+07	0.0123884	3.14996e+07	3.37355e+07	3.18556e+07	3.23636e+07	0.0303098	3.25886e+07	3.25819e+07	2.90211e+07	3.13972e+07	0.0535136	3.2228e+07	3.24452e+07	3.07859e+07	3.18197e+07	0.023142	2.70873e+07	2.75207e+07	2.718e+07	2.72627e+07	0.00683526
P28074	PSMB5	Proteasome subunit beta type-5	3	3	-0.408052	0.0718309		22.3897	22.4781	21.9984	21.7439	21.8765	22.0216	5.76309e+06	4.88348e+06	5.83811e+06	5.4949e+06	0.078877	5.68374e+06	5.73595e+06	6.10665e+06	5.84211e+06	0.0322258	3.96181e+06	4.26372e+06	4.34334e+06	4.18962e+06	0.0392236	3.95663e+06	3.36081e+06	3.21862e+06	3.51202e+06	0.0910305	3.39625e+06	4.11547e+06	4.03882e+06	3.85018e+06	0.0837615	4.35403e+06	4.13054e+06	4.28802e+06	4.25753e+06	0.0220197
Q96JJ7	TMX3	Protein disulfide-isomerase TMX3	7	6	-0.197508	0.0719548		25.3911	25.2557	25.4882	25.1758	25.2618	25.1048	4.48214e+07	4.26424e+07	4.45434e+07	4.40024e+07	0.0220061	3.97108e+07	4.12814e+07	3.91916e+07	4.00613e+07	0.0221763	4.71167e+07	4.64854e+07	4.7593e+07	4.7065e+07	0.00963804	4.00357e+07	3.77637e+07	3.59125e+07	3.7904e+07	0.0444853	3.87236e+07	3.98999e+07	4.2069e+07	4.02308e+07	0.0344431	3.57955e+07	3.72447e+07	3.52052e+07	3.60818e+07	0.0237488
Q8N5K1	CISD2	CDGSH iron-sulfur domain-containing protein 2	2	2	0.281775	0.0720125		21.743	21.7182	21.5823	22.1704	21.8839	21.8346	3.58017e+06	3.18485e+06	3.75086e+06	3.5053e+06	0.0676291	3.2961e+06	3.20649e+06	3.83893e+06	3.44717e+06	0.0810567	3.03219e+06	3.35664e+06	3.0192e+06	3.13601e+06	0.0497761	5.11029e+06	4.82646e+06	4.22018e+06	4.71898e+06	0.0786715	3.9576e+06	3.86247e+06	3.7955e+06	3.87186e+06	0.017177	3.77871e+06	3.92789e+06	3.52116e+06	3.74259e+06	0.0448886
Q08211	DHX9	ATP-dependent RNA helicase A	34	32	0.117778	0.0722342		27.2077	27.2445	27.3066	27.3828	27.4314	27.2979	1.55984e+08	1.51288e+08	1.56516e+08	1.54596e+08	0.0151965	1.59557e+08	1.63079e+08	1.55833e+08	1.5949e+08	0.0185486	1.6599e+08	1.65892e+08	1.65927e+08	1.65936e+08	0.000245772	1.79544e+08	1.73169e+08	1.72385e+08	1.75033e+08	0.0183155	1.8208e+08	1.81253e+08	1.80003e+08	1.81112e+08	0.00471434	1.59252e+08	1.68401e+08	1.66955e+08	1.6487e+08	0.0243562
Q00577	PURA	Transcriptional activator protein Pur-alpha	4	3	-0.270961	0.0722571		24.5904	24.9155	24.8422	24.555	24.4069	24.5734	2.64051e+07	2.40094e+07	2.53699e+07	2.52615e+07	0.0388357	3.03728e+07	3.14714e+07	3.30936e+07	3.16459e+07	0.0353159	2.71945e+07	3.16761e+07	3.13627e+07	3.00778e+07	0.0679172	2.61958e+07	2.31281e+07	2.46212e+07	2.46484e+07	0.0508164	2.05553e+07	2.30745e+07	2.30995e+07	2.22431e+07	0.0536567	2.46087e+07	2.62051e+07	2.40821e+07	2.49653e+07	0.0361552
P19404	NDUFV2	NADH dehydrogenase [ubiquinone] flavoprotein 2, mitochondrial	6	6	0.198832	0.0724018		24.6703	24.7129	24.8044	25.0062	24.9933	24.7846	2.796e+07	2.62784e+07	2.58474e+07	2.66953e+07	0.0341422	2.74335e+07	2.83529e+07	2.67932e+07	2.75265e+07	0.0232538	2.87026e+07	2.95936e+07	2.96508e+07	2.93157e+07	0.0148087	3.48693e+07	3.31754e+07	3.31465e+07	3.37304e+07	0.0238772	3.32186e+07	3.21206e+07	3.48525e+07	3.33972e+07	0.0336086	2.7678e+07	2.87686e+07	3.01553e+07	2.88673e+07	0.0351172
Q9GZR7	DDX24	ATP-dependent RNA helicase DDX24	6	6	0.242208	0.0730848		22.2736	22.5237	22.4751	22.7915	22.632	22.5754	4.8707e+06	4.55566e+06	5.77145e+06	5.06594e+06	0.101696	5.59218e+06	6.15432e+06	6.34585e+06	6.03078e+06	0.053035	6.50675e+06	5.33e+06	5.64638e+06	5.82771e+06	0.0853206	6.29994e+06	7.74198e+06	7.7424e+06	7.26144e+06	0.0936294	6.72914e+06	6.21428e+06	6.54563e+06	6.49635e+06	0.0327972	6.2148e+06	6.41119e+06	6.13204e+06	6.25268e+06	0.0187225
Q9Y4L1	HYOU1	Hypoxia up-regulated protein 1	17	16	-0.37468	0.0731607		26.5745	27.0822	26.6854	26.3812	26.4406	26.3963	1.0055e+08	1.00931e+08	9.8321e+07	9.99338e+07	0.0115172	1.44087e+08	1.3865e+08	1.43528e+08	1.42088e+08	0.0171848	1.04828e+08	1.08372e+08	1.10571e+08	1.07924e+08	0.0219231	8.35551e+07	8.91433e+07	8.95085e+07	8.74023e+07	0.0311716	8.63103e+07	9.13557e+07	9.55769e+07	9.1081e+07	0.04159	8.77707e+07	8.66695e+07	9.05245e+07	8.83216e+07	0.0183569
Q9Y3C8	UFC1	Ubiquitin-fold modifier-conjugating enzyme 1	2	2	-0.283314	0.0742279		22.1545	22.3519	21.9639	21.8179	21.859	21.9436	4.01594e+06	5.14246e+06	4.84686e+06	4.66842e+06	0.102153	5.07755e+06	5.28578e+06	5.69595e+06	5.35309e+06	0.0479927	4.63399e+06	3.52057e+06	4.11762e+06	4.09073e+06	0.111215	3.15858e+06	4.09611e+06	3.83597e+06	3.69689e+06	0.106895	3.55966e+06	4.25619e+06	3.59529e+06	3.80371e+06	0.0842012	4.36983e+06	3.60528e+06	4.12516e+06	4.03342e+06	0.0790386
Q9BZE1	MRPL37	39S ribosomal protein L37, mitochondrial	6	6	0.300465	0.0743388		22.4923	22.3129	22.48	22.6606	22.9459	22.58	6.2665e+06	5.98736e+06	5.44073e+06	5.89819e+06	0.0581474	5.0568e+06	5.55762e+06	5.01221e+06	5.20887e+06	0.0474711	6.21769e+06	5.35929e+06	5.98738e+06	5.85479e+06	0.0619606	6.20059e+06	6.86131e+06	6.83888e+06	6.63359e+06	0.0461768	7.93532e+06	8.10759e+06	8.20606e+06	8.08299e+06	0.0138423	6.25641e+06	6.50865e+06	6.056e+06	6.27369e+06	0.0295198
P08107	#N/A	Heat shock 70 kDa protein 1A/1B	29	25	0.279264	0.0745766		28.7162	29.0609	29.0111	29.2803	29.2193	29.1263	4.41412e+08	4.52769e+08	4.27917e+08	4.407e+08	0.0230503	5.63603e+08	5.54213e+08	5.61948e+08	5.59921e+08	0.00730967	5.40373e+08	5.46083e+08	5.37759e+08	5.41405e+08	0.00642015	6.39822e+08	6.60992e+08	6.54713e+08	6.51842e+08	0.0136197	6.18486e+08	6.10556e+08	6.45176e+08	6.24739e+08	0.0237043	5.74333e+08	5.84672e+08	6.00444e+08	5.86483e+08	0.0183061
P82909	MRPS36	28S ribosomal protein S36, mitochondrial	5	4	0.431784	0.0746533		22.58	22.1704	22.6409	22.8346	23.0967	22.7553	6.57726e+06	6.41473e+06	5.83188e+06	6.27462e+06	0.0510027	4.70622e+06	4.70656e+06	4.75444e+06	4.72241e+06	0.00479604	6.91643e+06	6.84016e+06	5.8681e+06	6.54157e+06	0.0729535	8.13951e+06	7.3464e+06	6.96758e+06	7.48449e+06	0.0652416	9.82691e+06	8.73372e+06	8.33636e+06	8.96566e+06	0.0702935	7.44266e+06	7.03886e+06	6.76583e+06	7.08245e+06	0.0392558
Q9UBV2	SEL1L	Protein sel-1 homolog 1	5	4	-0.299013	0.0748913		22.5847	22.5412	22.3945	22.2108	22.3984	22.0143	5.90887e+06	6.13007e+06	6.83221e+06	6.29038e+06	0.062576	6.04965e+06	6.48831e+06	5.77297e+06	6.10364e+06	0.0482533	5.94258e+06	4.84736e+06	5.7505e+06	5.51348e+06	0.0866063	5.33165e+06	4.79947e+06	4.43142e+06	4.85418e+06	0.0761294	5.7712e+06	5.56103e+06	5.25247e+06	5.52823e+06	0.0385366	4.0868e+06	4.62197e+06	3.99918e+06	4.23598e+06	0.0649841
Q14118	DAG1	Dystroglycan	8	8	0.370643	0.075119		24.5105	24.141	24.0359	24.5105	24.7077	24.5812	2.34377e+07	2.40008e+07	2.43376e+07	2.39254e+07	0.0155166	1.87227e+07	1.94991e+07	1.736e+07	1.85273e+07	0.0477217	1.68945e+07	1.76498e+07	1.70304e+07	1.71916e+07	0.0191205	2.49991e+07	2.30869e+07	2.34963e+07	2.38608e+07	0.034453	2.75017e+07	2.7259e+07	2.73515e+07	2.73707e+07	0.0036542	2.40801e+07	2.48208e+07	2.64341e+07	2.51117e+07	0.0391355
Q9H845	ACAD9	Acyl-CoA dehydrogenase family member 9, mitochondrial	9	9	0.548364	0.0752246		23.7995	24.1488	24.0854	24.4614	24.9495	24.2679	1.49093e+07	1.48206e+07	1.40837e+07	1.46045e+07	0.0253379	1.73165e+07	1.98753e+07	1.8472e+07	1.85546e+07	0.0563865	1.66825e+07	1.84897e+07	1.83732e+07	1.78485e+07	0.0462696	2.1322e+07	2.47899e+07	2.32413e+07	2.31177e+07	0.0613586	3.10989e+07	3.2781e+07	3.32425e+07	3.23741e+07	0.0284548	2.02924e+07	2.10077e+07	1.92801e+07	2.01934e+07	0.0350983
Q9BX68	HINT2	Histidine triad nucleotide-binding protein 2, mitochondrial	4	3	0.529259	0.0752563		23.2273	23.3645	23.3778	23.7492	24.2679	23.5404	9.56406e+06	1.00431e+07	9.85199e+06	9.81971e+06	0.0200502	9.59455e+06	1.07365e+07	1.20022e+07	1.07777e+07	0.0912396	1.0962e+07	9.94501e+06	1.16876e+07	1.08649e+07	0.0657827	1.41619e+07	1.44252e+07	1.38165e+07	1.41346e+07	0.0176354	2.18085e+07	1.92938e+07	1.9379e+07	2.01604e+07	0.0578288	1.20166e+07	1.23562e+07	1.23381e+07	1.2237e+07	0.0127476
Q06278	AOX1	Aldehyde oxidase	12	11	-0.639907	0.0753745		24.2656	25.1582	24.8596	24.0478	24.0872	24.2287	1.92611e+07	1.91148e+07	2.21293e+07	2.01684e+07	0.0688131	3.86042e+07	3.66277e+07	3.71e+07	3.7444e+07	0.022508	3.01682e+07	3.03457e+07	3.08125e+07	3.04421e+07	0.00892692	1.4747e+07	1.78092e+07	1.94703e+07	1.73422e+07	0.112808	1.91172e+07	1.7282e+07	1.70689e+07	1.78227e+07	0.0515898	2.05814e+07	1.84627e+07	1.99323e+07	1.96588e+07	0.0450849
P49721	PSMB2	Proteasome subunit beta type-2	3	3	-0.236805	0.0754699		23.6835	23.5703	23.3713	23.2957	23.3766	23.2424	1.24246e+07	1.3462e+07	1.45297e+07	1.34721e+07	0.0637942	1.27026e+07	1.14787e+07	1.31864e+07	1.24559e+07	0.0576963	1.03925e+07	1.06276e+07	1.15333e+07	1.08511e+07	0.0453229	9.40524e+06	9.7982e+06	1.16877e+07	1.02971e+07	0.0967614	9.5648e+06	1.1345e+07	1.17634e+07	1.08911e+07	0.0875256	8.70557e+06	9.80277e+06	1.12608e+07	9.92304e+06	0.105474
P49720	PSMB3	Proteasome subunit beta type-3	4	4	-0.427849	0.0755644		23.9105	23.5363	23.3453	23.0358	23.2581	23.2146	1.63756e+07	1.54517e+07	1.54758e+07	1.57677e+07	0.0272666	1.258e+07	1.10123e+07	1.29038e+07	1.21653e+07	0.067898	1.08232e+07	1.02334e+07	1.09144e+07	1.0657e+07	0.0283194	8.71111e+06	8.55338e+06	8.53345e+06	8.59932e+06	0.00924137	8.68258e+06	1.01258e+07	1.12865e+07	1.00316e+07	0.106179	9.63426e+06	9.44815e+06	1.01206e+07	9.73433e+06	0.0291231
P63027	VAMP2	Vesicle-associated membrane protein 2	2	2	-0.187333	0.0759001		23.7984	23.9996	23.9488	23.7884	23.7683	23.6281	1.51637e+07	1.45486e+07	1.40555e+07	1.45892e+07	0.0310727	1.46805e+07	1.80577e+07	1.7578e+07	1.67721e+07	0.0889483	1.58578e+07	1.59616e+07	1.67574e+07	1.61923e+07	0.0248182	1.5516e+07	1.3882e+07	1.40677e+07	1.44886e+07	0.050416	1.44625e+07	1.44606e+07	1.39399e+07	1.42876e+07	0.0172119	1.20972e+07	1.35786e+07	1.32183e+07	1.29647e+07	0.0486535
O75251	NDUFS7	NADH dehydrogenase [ubiquinone] iron-sulfur protein 7, mitochondrial	6	6	0.190603	0.0759212		24.0526	23.9316	23.9495	24.2463	24.2317	24.0275	1.73121e+07	1.76433e+07	1.72706e+07	1.74087e+07	0.00958065	1.54946e+07	1.65038e+07	1.60209e+07	1.60064e+07	0.0257464	1.55559e+07	1.62277e+07	1.69223e+07	1.62353e+07	0.0343593	1.89823e+07	2.16842e+07	1.91034e+07	1.99233e+07	0.062545	1.93934e+07	2.05132e+07	1.92379e+07	1.97148e+07	0.0288162	1.75258e+07	1.71555e+07	1.67023e+07	1.71279e+07	0.0196613
Q9NRX4	PHPT1	14 kDa phosphohistidine phosphatase	2	2	-0.38869	0.0759383		23.751	24.122	23.901	23.3476	23.7662	23.4941	1.4187e+07	1.39532e+07	1.42117e+07	1.41173e+07	0.00825138	1.76175e+07	1.80918e+07	1.90632e+07	1.82575e+07	0.0329568	1.61106e+07	1.56928e+07	1.51915e+07	1.5665e+07	0.0239883	1.09965e+07	1.06868e+07	1.03377e+07	1.06737e+07	0.0252095	1.4014e+07	1.4561e+07	1.4228e+07	1.42677e+07	0.0157747	1.22461e+07	1.14588e+07	1.174e+07	1.1815e+07	0.0275723
P48723	HSPA13	Heat shock 70 kDa protein 13	2	2	-0.242467	0.0759609		20.4174	20.2504	20.4828	20.1234	20.2785	20.0213	1.16359e+06	1.3863e+06	1.65114e+06	1.40035e+06	0.142314	1.42269e+06	1.04114e+06	1.27818e+06	1.24734e+06	0.1261	1.44033e+06	1.48707e+06	1.46875e+06	1.46539e+06	0.0131226	1.28354e+06	1.16e+06	983128	1.14222e+06	0.107934	1.16617e+06	1.41793e+06	1.23139e+06	1.27183e+06	0.0838812	932306	1.2067e+06	1.05359e+06	1.0642e+06	0.105499
Q15181	PPA1	Inorganic pyrophosphatase	7	6	0.219522	0.0760495		25.5105	25.5869	25.7363	25.8191	25.9473	25.726	4.77948e+07	4.81307e+07	4.73634e+07	4.77629e+07	0.00657522	5.01189e+07	4.96417e+07	5.14497e+07	5.04034e+07	0.0151779	5.48104e+07	5.44703e+07	5.85689e+07	5.59499e+07	0.0331927	5.48378e+07	6.1369e+07	6.13544e+07	5.91871e+07	0.0519603	6.22973e+07	6.50721e+07	6.68373e+07	6.47355e+07	0.0288662	5.48697e+07	5.43632e+07	5.72074e+07	5.54801e+07	0.0223284
P54725	RAD23A	UV excision repair protein RAD23 homolog A	2	2	0.274695	0.0764117		22.3565	22.1015	22.0258	22.343	22.4221	22.5427	5.24328e+06	5.04794e+06	5.81675e+06	5.36932e+06	0.0607662	4.64259e+06	4.16265e+06	4.69149e+06	4.49891e+06	0.053037	4.13874e+06	4.56209e+06	4.10452e+06	4.26845e+06	0.0487542	4.68531e+06	5.81117e+06	5.46442e+06	5.3203e+06	0.0884896	5.11445e+06	6.2448e+06	5.49221e+06	5.61715e+06	0.0836449	6.85885e+06	5.40748e+06	6.05779e+06	6.10804e+06	0.0971809
Q9Y5Y2	NUBP2	Cytosolic Fe-S cluster assembly factor NUBP2	2	2	0.260062	0.0771456		20.9812	21.2066	21.0559	21.4923	21.343	21.1886	1.94105e+06	1.78524e+06	2.49394e+06	2.07341e+06	0.14666	2.58715e+06	2.60794e+06	2.07708e+06	2.42406e+06	0.101275	2.03379e+06	2.56055e+06	1.94648e+06	2.18027e+06	0.12441	2.22834e+06	3.2472e+06	3.38031e+06	2.95195e+06	0.174308	2.62544e+06	2.72091e+06	2.62103e+06	2.65579e+06	0.0173512	2.29638e+06	2.4907e+06	2.38054e+06	2.38921e+06	0.0333019
P04439	HLA-A	HLA class I histocompatibility antigen, A-3 alpha chain	15	3	0.649167	0.0774115		23.2229	24.019	24.0105	24.3239	24.3239	24.5522	9.89751e+06	9.43384e+06	1.0049e+07	9.79343e+06	0.02672	1.57365e+07	1.67224e+07	1.85124e+07	1.69904e+07	0.067627	1.68491e+07	1.61854e+07	1.75786e+07	1.6871e+07	0.0337271	2.09497e+07	2.08382e+07	2.13304e+07	2.10394e+07	0.0100156	2.20097e+07	2.10261e+07	2.00034e+07	2.10131e+07	0.0389815	2.34381e+07	2.54051e+07	2.50326e+07	2.46253e+07	0.0346439
P80404	ABAT	4-aminobutyrate aminotransferase, mitochondrial	3	3	0.785756	0.0774923		18.5915	18.5878	19.1898	20.0951	19.4129	19.2185	353694	454041	377876	395204	0.108196	324779	367758	488808	393781	0.176359	637694	718380	437780	597951	0.197259	1.47838e+06	971636	922648	1.12422e+06	0.223465	598393	761769	734342	698168	0.102317	648386	490442	689693	609507	0.140875
P13797	PLS3	Plastin-3	14	13	0.254278	0.0779658		26.509	26.4938	26.1965	26.6181	26.6181	26.726	9.72527e+07	9.19598e+07	9.72283e+07	9.54803e+07	0.0260724	8.87551e+07	9.5923e+07	9.88449e+07	9.45077e+07	0.0448533	7.72321e+07	7.5749e+07	7.76203e+07	7.68671e+07	0.0104906	9.89402e+07	1.04608e+08	1.06759e+08	1.03436e+08	0.0318841	9.95488e+07	1.04949e+08	1.03937e+08	1.02811e+08	0.0227961	1.12862e+08	1.12277e+08	1.09132e+08	1.11424e+08	0.0147029
P80217	IFI35	Interferon-induced 35 kDa protein	2	2	-0.69894	0.0780091		18.6975	18.7365	18.497	18.2056	17.371	18.2575	463465	430363	381497	425109	0.0792007	248299	506597	555445	436781	0.308531	324694	418543	366603	369947	0.103763	337326	297914	271665	302302	0.0892652	177854	174047	156632	169511	0.0544997	234459	326065	379589	313371	0.191227
Q86V81	ALYREF	THO complex subunit 4	9	9	0.21467	0.0780753		26.9539	27.0711	26.9316	27.2714	27.2891	27.0401	1.25172e+08	1.2776e+08	1.38458e+08	1.30464e+08	0.0440814	1.39403e+08	1.39362e+08	1.45246e+08	1.41337e+08	0.0195569	1.24648e+08	1.26088e+08	1.3218e+08	1.27638e+08	0.0255772	1.50711e+08	1.68701e+08	1.67762e+08	1.62391e+08	0.050916	1.57566e+08	1.71791e+08	1.63723e+08	1.6436e+08	0.0354382	1.42896e+08	1.31156e+08	1.40439e+08	1.38164e+08	0.0365895
P19387	POLR2C	DNA-directed RNA polymerase II subunit RPB3	2	2	0.357699	0.0781917		19.5526	19.9009	19.5657	20.1825	20.0691	19.8408	414364	910371	983205	769314	0.32853	901685	1.24306e+06	792647	979132	0.195953	625265	830122	873469	776285	0.139439	980772	1.03197e+06	1.54615e+06	1.1863e+06	0.215217	959438	1.15188e+06	1.20232e+06	1.10455e+06	0.0947478	946922	1.01688e+06	852983	938927	0.0715151
P11142	HSPA8	Heat shock cognate 71 kDa protein	36	26	-0.173814	0.0785577		29.53	29.3132	29.4264	29.2542	29.1788	29.3152	7.77114e+08	7.78387e+08	7.70095e+08	7.75199e+08	0.00470364	6.75418e+08	6.77417e+08	6.48317e+08	6.67051e+08	0.0198961	7.25414e+08	7.08261e+08	7.30826e+08	7.215e+08	0.0133319	6.59549e+08	6.22827e+08	6.38561e+08	6.40312e+08	0.0234924	6.39289e+08	5.85976e+08	5.97897e+08	6.0772e+08	0.0375937	6.79601e+08	6.74033e+08	6.5021e+08	6.67948e+08	0.0190833
P00505	GOT2	Aspartate aminotransferase, mitochondrial	15	15	0.278759	0.0787657		26.6865	26.726	26.8019	26.9088	27.2445	26.8974	1.06876e+08	1.09099e+08	1.07469e+08	1.07815e+08	0.00871894	1.09656e+08	1.11201e+08	1.12718e+08	1.11192e+08	0.0112448	1.16343e+08	1.17736e+08	1.16333e+08	1.16804e+08	0.00564093	1.23844e+08	1.24962e+08	1.30007e+08	1.26271e+08	0.021231	1.62638e+08	1.56157e+08	1.57707e+08	1.58834e+08	0.0173976	1.20558e+08	1.26451e+08	1.27281e+08	1.24764e+08	0.0239897
Q13740	ALCAM	CD166 antigen	8	8	0.664167	0.0787912		23.8576	23.2821	23.0071	24.2243	24.1253	23.7895	1.55085e+07	1.48513e+07	1.52611e+07	1.5207e+07	0.0178211	9.96985e+06	1.00187e+07	1.05875e+07	1.0192e+07	0.0275058	9.12202e+06	7.51921e+06	8.65876e+06	8.43333e+06	0.0798591	1.87231e+07	1.91672e+07	2.09973e+07	1.96292e+07	0.0501423	1.65554e+07	1.96146e+07	1.87254e+07	1.82985e+07	0.0702193	1.5504e+07	1.40754e+07	1.39689e+07	1.45161e+07	0.0482163
Q9UKV3	ACIN1	Apoptotic chromatin condensation inducer in the nucleus	10	10	0.219325	0.0792376		24.5345	24.6811	24.4984	24.8191	24.9043	24.6486	2.62526e+07	2.37873e+07	2.29984e+07	2.43461e+07	0.0569303	2.53164e+07	2.72823e+07	2.82272e+07	2.6942e+07	0.0450031	2.32082e+07	2.39479e+07	2.40672e+07	2.37411e+07	0.0160036	2.94151e+07	2.87785e+07	3.07393e+07	2.96443e+07	0.0275501	3.08946e+07	3.05568e+07	3.28362e+07	3.14292e+07	0.0319579	2.44037e+07	2.74354e+07	2.69531e+07	2.62641e+07	0.0506448
P35914	HMGCL	Hydroxymethylglutaryl-CoA lyase, mitochondrial	3	3	0.352786	0.0793201		23.4041	23.3511	23.48	23.6971	24.0443	23.5522	1.04004e+07	1.07452e+07	1.21442e+07	1.10966e+07	0.0679481	1.13767e+07	1.10044e+07	9.75272e+06	1.07113e+07	0.0648496	1.08552e+07	1.2429e+07	1.17227e+07	1.1669e+07	0.0551562	1.10632e+07	1.55156e+07	1.42379e+07	1.36055e+07	0.13758	1.54104e+07	1.9607e+07	1.69813e+07	1.73329e+07	0.0998795	1.15339e+07	1.20182e+07	1.32989e+07	1.22837e+07	0.0606162
P35998	PSMC2	26S protease regulatory subunit 7	9	9	-0.227264	0.0800905		24.9996	24.8928	24.6958	24.6274	24.708	24.571	3.18126e+07	3.30379e+07	3.57835e+07	3.35447e+07	0.0494935	3.05267e+07	3.12367e+07	3.16923e+07	3.11519e+07	0.0153962	2.6919e+07	2.62428e+07	2.83636e+07	2.71751e+07	0.0325506	2.67665e+07	2.651e+07	2.44749e+07	2.59171e+07	0.0395569	2.5944e+07	2.70096e+07	2.92658e+07	2.74065e+07	0.0505305	2.41737e+07	2.55377e+07	2.50574e+07	2.49229e+07	0.0226656
O43516	WIPF1	WAS/WASL-interacting protein family member 1	2	2	0.363385	0.0801077		20.343	20.8651	20.714	21.0224	20.9742	21.0156	1.25627e+06	1.46383e+06	1.27162e+06	1.33057e+06	0.0709752	1.90799e+06	1.91315e+06	1.90758e+06	1.90957e+06	0.00132633	1.53563e+06	2.01039e+06	1.61704e+06	1.72102e+06	0.120451	2.33007e+06	1.98239e+06	2.07011e+06	2.12752e+06	0.0693921	2.1784e+06	1.97747e+06	2.02285e+06	2.05957e+06	0.0417753	2.07599e+06	2.12259e+06	2.15688e+06	2.11849e+06	0.0156489
O95817	BAG3	BAG family molecular chaperone regulator 3	3	3	-0.432844	0.0804687		21.7447	21.6471	21.4191	21.3812	20.8591	21.2721	3.76036e+06	3.75925e+06	3.02272e+06	3.51411e+06	0.0988772	2.94444e+06	3.68411e+06	3.22385e+06	3.28413e+06	0.0928592	2.78921e+06	3.15216e+06	2.47115e+06	2.80417e+06	0.0992165	2.8364e+06	2.38128e+06	2.97622e+06	2.7313e+06	0.0929952	2.28275e+06	1.81534e+06	1.60803e+06	1.90204e+06	0.148364	2.51278e+06	2.53014e+06	2.55466e+06	2.53253e+06	0.00678321
P12956	XRCC6	X-ray repair cross-complementing protein 6	30	30	0.29987	0.0807114		27.4938	27.8623	27.6181	27.9814	27.8264	28.066	1.81737e+08	1.91179e+08	1.94924e+08	1.8928e+08	0.029313	2.36312e+08	2.47096e+08	2.49655e+08	2.44354e+08	0.0236609	2.03573e+08	2.08437e+08	2.07047e+08	2.06352e+08	0.00991198	2.53836e+08	2.68706e+08	2.72763e+08	2.65102e+08	0.0306919	2.2083e+08	2.42975e+08	2.50568e+08	2.38124e+08	0.0529799	2.81424e+08	2.74918e+08	2.86545e+08	2.80963e+08	0.0169339
Q53TN4	CYBRD1	Cytochrome b reductase 1	2	2	-4.02313	0.0808675	+	18.9557	23.8425	24.3965	18.4804	18.1653	18.4796	430730	768280	326336	508448	0.370945	1.27243e+07	1.53336e+07	1.70693e+07	1.50424e+07	0.118715	2.27311e+07	2.22538e+07	2.12665e+07	2.20838e+07	0.0276177	356938	424994	315248	365727	0.123679	350554	234794	296573	293974	0.16088	295866	354128	446589	365528	0.169777
P14209	CD99	CD99 antigen	5	5	0.186412	0.0811095		25.2891	25.1015	25.1371	25.317	25.4738	25.2961	4.23359e+07	4.13711e+07	3.92091e+07	4.0972e+07	0.0319073	3.78755e+07	3.61522e+07	3.39666e+07	3.59981e+07	0.0444337	3.66544e+07	3.74976e+07	3.64806e+07	3.68775e+07	0.0120437	4.51857e+07	4.08304e+07	3.94472e+07	4.18211e+07	0.0584688	5.61682e+07	4.43006e+07	3.94021e+07	4.66237e+07	0.150976	4.23588e+07	4.1207e+07	3.99527e+07	4.11728e+07	0.0238654
Q92466	DDB2	DNA damage-binding protein 2	3	3	0.704225	0.0812148		20.6096	21.4726	21.5545	21.9672	21.9171	21.8651	1.28698e+06	1.64258e+06	1.87352e+06	1.60102e+06	0.150685	2.57086e+06	3.22176e+06	2.9511e+06	2.91457e+06	0.0916012	3.10662e+06	3.17379e+06	2.95651e+06	3.07897e+06	0.0295011	3.21181e+06	4.31504e+06	4.76258e+06	4.09648e+06	0.159086	3.45342e+06	3.62257e+06	4.80659e+06	3.96086e+06	0.151986	3.86553e+06	3.62581e+06	3.96501e+06	3.81879e+06	0.0372816
P40306	PSMB10	Proteasome subunit beta type-10	2	2	-0.292318	0.0814317		22.4566	22.2884	22.3484	22.2351	21.8472	22.1342	6.45762e+06	4.74439e+06	6.06556e+06	5.75586e+06	0.127332	4.92502e+06	5.51643e+06	4.92632e+06	5.12259e+06	0.0543645	4.76909e+06	5.73264e+06	5.51829e+06	5.34e+06	0.0773545	4.21156e+06	5.59659e+06	5.00151e+06	4.93655e+06	0.114918	4.19737e+06	3.401e+06	3.71996e+06	3.77278e+06	0.0867404	4.93452e+06	4.54831e+06	4.32696e+06	4.60327e+06	0.0545397
P29972	AQP1	Aquaporin-1	2	2	1.81614	0.0814654		23.2535	23.8764	25.8264	26.0752	26.3645	25.965	1.11884e+07	9.25302e+06	9.60567e+06	1.00157e+07	0.0840334	1.46715e+07	1.5192e+07	1.62241e+07	1.53625e+07	0.042001	6.12429e+07	5.68505e+07	6.05339e+07	5.95424e+07	0.0323361	7.7274e+07	6.7097e+07	6.75958e+07	7.06556e+07	0.0662978	8.82965e+07	8.50615e+07	8.58516e+07	8.64032e+07	0.0159376	6.7242e+07	6.49028e+07	6.42083e+07	6.5451e+07	0.019828
Q8TCS8	PNPT1	Polyribonucleotide nucleotidyltransferase 1, mitochondrial	2	2	0.345554	0.0815457		20.85	20.7796	20.4476	21.1079	21.1332	20.8727	2.04571e+06	1.55118e+06	2.06311e+06	1.88667e+06	0.125794	1.65037e+06	1.83315e+06	1.91876e+06	1.80076e+06	0.0621618	1.86754e+06	1.09878e+06	1.32935e+06	1.43189e+06	0.224955	1.88155e+06	2.83134e+06	2.06386e+06	2.25892e+06	0.182188	1.93024e+06	2.3244e+06	2.6393e+06	2.29798e+06	0.126229	2.66277e+06	1.41819e+06	1.68275e+06	1.92124e+06	0.27865
Q9BRA2	TXNDC17	Thioredoxin domain-containing protein 17	3	3	-0.370111	0.0816129		23.7088	24.0601	23.6273	23.2941	23.597	23.3948	1.37439e+07	1.32267e+07	1.41612e+07	1.37106e+07	0.0278794	1.70177e+07	1.76949e+07	1.77615e+07	1.74914e+07	0.0192118	1.32438e+07	1.23556e+07	1.32736e+07	1.29577e+07	0.0328712	1.07053e+07	1.04631e+07	9.68812e+06	1.02855e+07	0.0421795	1.22267e+07	1.30823e+07	1.27562e+07	1.26884e+07	0.0277875	1.06496e+07	1.17059e+07	1.07309e+07	1.10288e+07	0.0435173
P30084	ECHS1	Enoyl-CoA hydratase, mitochondrial	17	17	0.436443	0.0819786		27.5165	27.7771	27.632	27.9316	28.4234	27.8799	1.92406e+08	1.99211e+08	1.83697e+08	1.91771e+08	0.0331107	2.3484e+08	2.25104e+08	2.2922e+08	2.29721e+08	0.0173699	1.9935e+08	2.1026e+08	2.14582e+08	2.08064e+08	0.0308049	2.41388e+08	2.605e+08	2.67494e+08	2.56461e+08	0.0430227	3.42701e+08	3.57823e+08	3.80942e+08	3.60489e+08	0.0436215	2.52914e+08	2.45232e+08	2.4382e+08	2.47322e+08	0.0161564
Q13510	ASAH1	Acid ceramidase	5	5	-0.546345	0.0819928		23.341	23.4927	23.9175	23.0299	22.7612	23.3212	1.09479e+07	1.06883e+07	1.02389e+07	1.06251e+07	0.0275672	1.17916e+07	1.22642e+07	1.13555e+07	1.18038e+07	0.031437	1.63549e+07	1.54765e+07	1.57029e+07	1.58447e+07	0.0235009	8.57871e+06	8.45622e+06	8.65707e+06	8.564e+06	0.00965114	6.7191e+06	7.25124e+06	7.35585e+06	7.10873e+06	0.0392197	1.00043e+07	1.05157e+07	1.09207e+07	1.04802e+07	0.035778
Q9P015	MRPL15	39S ribosomal protein L15, mitochondrial	6	6	0.282132	0.0825932		22.3752	22.4651	22.4996	22.7161	22.937	22.5333	4.65259e+06	5.75463e+06	5.90408e+06	5.4371e+06	0.102643	5.92069e+06	6.14042e+06	5.32219e+06	5.79444e+06	0.0596719	5.56654e+06	6.12891e+06	6.08443e+06	5.92663e+06	0.0430718	5.57738e+06	7.55943e+06	7.54787e+06	6.89489e+06	0.13512	7.61755e+06	8.54929e+06	7.91033e+06	8.02572e+06	0.0484736	6.10325e+06	5.8361e+06	6.25918e+06	6.06618e+06	0.0287988
Q96JB5	CDK5RAP3	CDK5 regulatory subunit-associated protein 3	3	3	-0.385529	0.0832418		22.6712	22.5382	22.2556	22.2482	22.1838	21.8764	6.65764e+06	6.4212e+06	6.95845e+06	6.6791e+06	0.0329166	6.11961e+06	6.53086e+06	5.62221e+06	6.09089e+06	0.0609947	5.72536e+06	5.17531e+06	4.1215e+06	5.00739e+06	0.132894	4.85807e+06	4.99585e+06	5.09158e+06	4.98184e+06	0.0192388	4.67834e+06	4.82474e+06	4.78985e+06	4.76431e+06	0.0131048	3.96017e+06	4.19523e+06	3.39441e+06	3.84993e+06	0.087299
Q13523	PRPF4B	Serine/threonine-protein kinase PRP4 homolog	2	2	0.353861	0.0833295		19.7955	20.2066	20.2535	20.4576	20.5165	20.343	711014	1.08808e+06	931772	910289	0.16993	1.23779e+06	1.2408e+06	1.14159e+06	1.20673e+06	0.03818	1.2276e+06	1.47525e+06	1.05795e+06	1.2536e+06	0.136687	1.21749e+06	1.36857e+06	1.72657e+06	1.43754e+06	0.1485	1.32346e+06	1.70343e+06	1.46866e+06	1.49852e+06	0.10447	1.4247e+06	1.29285e+06	1.26161e+06	1.32639e+06	0.053286
Q00839	HNRNPU	Heterogeneous nuclear ribonucleoprotein U	37	36	0.0842794	0.0833744		29.17	29.1771	29.1556	29.2399	29.3196	29.196	6.0777e+08	5.96292e+08	6.09338e+08	6.04467e+08	0.00962072	5.90156e+08	6.13975e+08	6.16888e+08	6.07007e+08	0.0197269	5.8993e+08	6.126e+08	5.90563e+08	5.97698e+08	0.0176354	6.22134e+08	6.34883e+08	6.44067e+08	6.33695e+08	0.0141918	6.51371e+08	6.6276e+08	6.95982e+08	6.70038e+08	0.0282454	5.78169e+08	6.21657e+08	6.44304e+08	6.1471e+08	0.0446435
Q96AC1	FERMT2	Fermitin family homolog 2	9	9	-0.311014	0.0834258		25.1609	25.2982	24.8616	24.8759	24.7345	24.7773	3.78108e+07	3.77315e+07	3.6995e+07	3.75124e+07	0.00979225	4.43186e+07	4.02191e+07	3.92398e+07	4.12592e+07	0.0533208	3.1744e+07	2.86802e+07	3.10291e+07	3.04844e+07	0.042932	2.80797e+07	3.27866e+07	3.14995e+07	3.07886e+07	0.0645126	2.74822e+07	2.7685e+07	2.85732e+07	2.79135e+07	0.0169729	2.84162e+07	2.75548e+07	3.02907e+07	2.87539e+07	0.0397228
Q12931	TRAP1	Heat shock protein 75 kDa, mitochondrial	5	4	0.381667	0.0835133		21.0756	20.8423	21.0756	21.3752	21.6364	21.1269	2.53671e+06	1.76221e+06	2.336e+06	2.21164e+06	0.148391	1.64065e+06	2.10256e+06	1.90694e+06	1.88338e+06	0.100514	2.39396e+06	2.22641e+06	2.01799e+06	2.21279e+06	0.0695013	2.51385e+06	2.51989e+06	3.11205e+06	2.71526e+06	0.103335	3.75866e+06	2.80632e+06	3.21468e+06	3.25989e+06	0.119668	2.29496e+06	1.85058e+06	2.71123e+06	2.28559e+06	0.153755
P09871	C1S	Complement C1s subcomponent	3	3	0.490744	0.0835566		21.0559	21.417	21.6409	22.1206	21.743	21.7223	2.38228e+06	2.24458e+06	1.91064e+06	2.17916e+06	0.0908705	2.81499e+06	3.09144e+06	2.48894e+06	2.79845e+06	0.0879934	3.2177e+06	3.32939e+06	3.25392e+06	3.267e+06	0.0142423	4.60335e+06	4.40376e+06	4.68627e+06	4.56446e+06	0.0259764	3.39835e+06	3.15593e+06	3.96792e+06	3.5074e+06	0.0970367	3.13523e+06	3.9339e+06	3.3109e+06	3.46001e+06	0.0990406
Q92804	TAF15	TATA-binding protein-associated factor 2N	3	2	0.148819	0.0837303		24.4551	24.6209	24.5812	24.7234	24.7594	24.6209	2.71902e+07	2.09261e+07	2.09449e+07	2.30204e+07	0.128082	2.28214e+07	2.82286e+07	2.64112e+07	2.58204e+07	0.0870106	2.34691e+07	2.46773e+07	2.71579e+07	2.51014e+07	0.0611717	2.92704e+07	2.68287e+07	2.70373e+07	2.77122e+07	0.039879	2.98172e+07	2.76092e+07	2.77042e+07	2.83769e+07	0.0359163	2.48084e+07	2.62793e+07	2.64094e+07	2.58324e+07	0.028105
Q9NZZ3	CHMP5	Charged multivesicular body protein 5	3	3	-0.200221	0.0841634		23.8407	23.829	23.6737	23.7043	23.4655	23.5729	1.55579e+07	1.55149e+07	1.39967e+07	1.50232e+07	0.0483289	1.42273e+07	1.55024e+07	1.4976e+07	1.49019e+07	0.0351101	1.35825e+07	1.31035e+07	1.3457e+07	1.3381e+07	0.0151552	1.38654e+07	1.37306e+07	1.34092e+07	1.36684e+07	0.0140017	1.23947e+07	1.1809e+07	1.05453e+07	1.1583e+07	0.0666284	1.23012e+07	1.25065e+07	1.26256e+07	1.24777e+07	0.0107387
O75534	CSDE1	Cold shock domain-containing protein E1	6	6	-0.404846	0.0841927		23.3764	23.3582	23.247	23.246	22.6575	22.8636	1.06822e+07	1.0591e+07	1.13954e+07	1.08895e+07	0.0330227	1.1841e+07	9.5248e+06	1.08933e+07	1.07531e+07	0.0884203	9.40893e+06	1.01747e+07	1.02809e+07	9.95485e+06	0.0390212	8.02766e+06	1.03855e+07	1.14304e+07	9.94785e+06	0.143068	7.02665e+06	6.5827e+06	6.23876e+06	6.61604e+06	0.0487476	6.97285e+06	7.99598e+06	7.92707e+06	7.63196e+06	0.0611788
P11586	MTHFD1	C-1-tetrahydrofolate synthase, cytoplasmic	16	15	0.227372	0.0842467		25.4202	25.5165	25.217	25.6865	25.5285	25.6209	4.47992e+07	4.44236e+07	4.55932e+07	4.49387e+07	0.0108499	4.76396e+07	4.81759e+07	4.80806e+07	4.79654e+07	0.00487096	3.79022e+07	3.95252e+07	3.97173e+07	3.90482e+07	0.0208507	4.89664e+07	5.71965e+07	5.59054e+07	5.40228e+07	0.0668979	4.32157e+07	5.03109e+07	5.17602e+07	4.8429e+07	0.0770923	4.8915e+07	5.49588e+07	5.10442e+07	5.16393e+07	0.0484711
P22033	MMUT	Methylmalonyl-CoA mutase, mitochondrial	6	6	0.592399	0.0842751		22.6757	23.1931	23.0559	23.4298	23.976	23.2961	6.07084e+06	7.05585e+06	6.9735e+06	6.70006e+06	0.0665961	9.33521e+06	9.918e+06	9.50916e+06	9.58746e+06	0.0254793	9.1453e+06	7.69685e+06	9.31917e+06	8.72044e+06	0.0833971	1.07665e+07	1.10783e+07	1.20711e+07	1.13053e+07	0.0492038	1.57237e+07	1.75821e+07	1.61539e+07	1.64866e+07	0.0481795	1.01047e+07	9.83216e+06	1.10377e+07	1.03249e+07	0.049995
Q96AE4	FUBP1	Far upstream element-binding protein 1	8	6	-0.331441	0.0842997		24.0235	23.8409	23.8415	23.7382	23.3108	23.6626	1.71782e+07	1.6971e+07	1.70082e+07	1.70525e+07	0.00528976	1.38718e+07	1.52909e+07	1.59134e+07	1.50254e+07	0.0568626	1.47574e+07	1.56203e+07	1.47176e+07	1.50318e+07	0.0277062	1.37613e+07	1.43899e+07	1.3828e+07	1.39931e+07	0.0201465	9.91231e+06	1.0198e+07	1.11046e+07	1.0405e+07	0.0488497	1.29033e+07	1.21602e+07	1.47718e+07	1.32784e+07	0.0827418
Q9NQC3	RTN4	Reticulon-4	13	13	0.323203	0.0845696		28.6898	28.4314	28.3282	28.8234	28.9567	28.6389	4.3084e+08	4.46306e+08	4.21863e+08	4.33003e+08	0.023315	3.7838e+08	3.52255e+08	3.56399e+08	3.62345e+08	0.0316392	3.51647e+08	3.19042e+08	3.4091e+08	3.372e+08	0.0402342	4.8511e+08	4.76833e+08	4.62926e+08	4.74956e+08	0.0192721	5.28081e+08	4.87998e+08	5.46484e+08	5.20855e+08	0.0468795	4.2937e+08	4.15018e+08	4.08363e+08	4.17583e+08	0.0209916
Q9UNN8	PROCR	Endothelial protein C receptor	2	2	0.49024	0.0848059		21.7876	21.4526	21.4324	22.4015	21.9423	21.7995	3.57386e+06	3.42672e+06	3.86698e+06	3.62252e+06	0.0505168	2.79184e+06	3.00814e+06	2.81396e+06	2.87131e+06	0.0338424	2.66955e+06	2.84983e+06	2.98244e+06	2.83394e+06	0.0452474	5.57188e+06	5.83197e+06	5.21279e+06	5.53888e+06	0.0458313	4.05744e+06	4.51646e+06	3.51096e+06	4.02829e+06	0.102031	3.14151e+06	3.49468e+06	4.31353e+06	3.64991e+06	0.134497
O60313	OPA1	Dynamin-like 120 kDa protein, mitochondrial	11	11	0.305791	0.0849095		23.9316	24.0105	23.9933	24.3307	24.4862	24.0359	1.4879e+07	1.55195e+07	1.75481e+07	1.59822e+07	0.0711866	1.78512e+07	1.60959e+07	1.68922e+07	1.69464e+07	0.0423464	1.60032e+07	1.7015e+07	1.70374e+07	1.66852e+07	0.0289088	1.94986e+07	2.18846e+07	2.20333e+07	2.11388e+07	0.0549421	1.97074e+07	2.49594e+07	2.58959e+07	2.35209e+07	0.115792	1.85759e+07	1.70179e+07	1.60022e+07	1.71987e+07	0.0615421
Q8NE86	MCU	Calcium uniporter protein, mitochondrial	5	5	0.61199	0.0854649		23.2679	22.741	23.0376	23.7895	23.9043	23.1886	1.04104e+07	1.03368e+07	9.42093e+06	1.00561e+07	0.0447594	7.55481e+06	6.69237e+06	6.79146e+06	7.01288e+06	0.0549462	7.45334e+06	9.41168e+06	8.95877e+06	8.60793e+06	0.0972469	1.22527e+07	1.55454e+07	1.57829e+07	1.4527e+07	0.110904	1.52801e+07	1.57661e+07	1.61817e+07	1.57426e+07	0.0234053	8.53977e+06	9.50186e+06	1.06392e+07	9.56028e+06	0.089755
P07585	DCN	Decorin	12	10	-0.326962	0.0854972		27.3081	26.8322	27.0279	26.7898	26.6527	26.7448	1.71531e+08	1.66207e+08	1.60782e+08	1.66173e+08	0.026407	1.26683e+08	1.1591e+08	1.15847e+08	1.1948e+08	0.0426312	1.41518e+08	1.28757e+08	1.40238e+08	1.36838e+08	0.0419312	1.14816e+08	1.18112e+08	1.15141e+08	1.16023e+08	0.0127833	1.06776e+08	1.02005e+08	1.07727e+08	1.05503e+08	0.0237273	1.0834e+08	1.16349e+08	1.12675e+08	1.12454e+08	0.0291094
Q15717	ELAVL1	ELAV-like protein 1	6	4	0.141538	0.0856316		24.4984	24.5105	24.4551	24.7024	24.6757	24.5105	2.37172e+07	2.40202e+07	2.3466e+07	2.37345e+07	0.00954617	2.33933e+07	2.31445e+07	2.51055e+07	2.38811e+07	0.0365033	2.25123e+07	2.37368e+07	2.28914e+07	2.30468e+07	0.0222095	2.86799e+07	2.56762e+07	2.76734e+07	2.73432e+07	0.0456529	2.75126e+07	2.57081e+07	2.70757e+07	2.67655e+07	0.0287172	2.19996e+07	2.31466e+07	2.65663e+07	2.39042e+07	0.0811478
P62879	GNB2	Guanine nucleotide-binding protein G(I)/G(S)/G(T) subunit beta-2	10	5	0.227806	0.0857789		27.0609	27.1214	26.976	27.3992	27.341	27.1015	1.35362e+08	1.37691e+08	1.45734e+08	1.39596e+08	0.031832	1.41291e+08	1.45984e+08	1.51942e+08	1.46406e+08	0.0297705	1.23252e+08	1.32428e+08	1.41172e+08	1.32284e+08	0.0553096	1.73513e+08	1.76937e+08	1.79725e+08	1.76725e+08	0.0143746	1.63841e+08	1.69047e+08	1.76992e+08	1.6996e+08	0.0318177	1.36597e+08	1.4323e+08	1.5335e+08	1.44392e+08	0.0477092
Q9Y2Q3	GSTK1	Glutathione S-transferase kappa 1	9	9	0.246024	0.0858955		26.5225	26.2944	26.632	26.6998	26.8142	26.673	9.39366e+07	9.90278e+07	9.63127e+07	9.64257e+07	0.021571	7.92244e+07	8.16949e+07	8.60076e+07	8.2309e+07	0.0340555	1.00188e+08	1.01449e+08	1.1106e+08	1.04233e+08	0.0465816	1.05926e+08	1.11879e+08	1.09037e+08	1.08947e+08	0.0223181	1.1766e+08	1.20454e+08	1.16156e+08	1.1809e+08	0.0150777	1.0368e+08	1.0868e+08	1.09591e+08	1.07317e+08	0.0242165
O43809	NUDT21	Cleavage and polyadenylation specificity factor subunit 5	5	5	0.189217	0.0859635		23.5045	23.5522	23.632	23.7182	23.895	23.6431	1.14799e+07	1.16171e+07	1.26039e+07	1.19003e+07	0.0420743	1.2645e+07	1.2719e+07	1.15955e+07	1.23198e+07	0.0416445	1.37424e+07	1.22737e+07	1.29213e+07	1.29791e+07	0.0463035	1.35092e+07	1.41532e+07	1.36059e+07	1.37561e+07	0.020613	1.49848e+07	1.62359e+07	1.57205e+07	1.56471e+07	0.0328093	1.37782e+07	1.25028e+07	1.30296e+07	1.31035e+07	0.0399347
Q9UHX1	PUF60	Poly(U)-binding-splicing factor PUF60	7	7	0.144627	0.0859845		24.4551	24.604	24.5404	24.7024	24.7441	24.5869	2.40934e+07	2.21046e+07	2.29226e+07	2.30402e+07	0.0354238	2.52188e+07	2.71144e+07	2.41155e+07	2.54829e+07	0.0485989	2.41305e+07	2.33107e+07	2.58197e+07	2.44203e+07	0.0427752	2.81886e+07	2.71777e+07	2.64341e+07	2.72668e+07	0.0263704	2.95562e+07	2.57139e+07	2.89289e+07	2.80663e+07	0.0599667	2.58755e+07	2.47822e+07	2.50743e+07	2.5244e+07	0.0183097
P10619	CTSA	Lysosomal protective protein	13	12	-0.414225	0.086028		27.0933	27.1882	27.3927	26.6056	26.7002	27.1257	1.44058e+08	1.41876e+08	1.43613e+08	1.43183e+08	0.00657485	1.57609e+08	1.53144e+08	1.48015e+08	1.52923e+08	0.0256352	1.75124e+08	1.7645e+08	1.77037e+08	1.76204e+08	0.00453971	1.06907e+08	1.02883e+08	9.6545e+07	1.02112e+08	0.0417722	1.12147e+08	1.09212e+08	1.05742e+08	1.09034e+08	0.024009	1.43973e+08	1.45661e+08	1.49685e+08	1.4644e+08	0.016363
Q8N6G6	ADAMTSL1	ADAMTS-like protein 1	2	2	0.759804	0.0862335		18.6523	17.8965	18.8757	18.9798	19.5223	19.2018	388948	393728	454488	412388	0.0723423	309437	205087	217263	243929	0.190987	454540	496450	492266	481085	0.0391781	624117	460656	465299	516691	0.147062	813377	743412	702755	753181	0.0606583	583736	640706	584571	603004	0.0442147
P12109	COL6A1	Collagen alpha-1(VI) chain	24	24	-0.699379	0.0867742		28.437	29.2048	28.315	27.6831	28.1047	28.0708	3.56637e+08	3.67583e+08	3.65985e+08	3.63402e+08	0.0132843	5.95756e+08	6.27229e+08	6.33257e+08	6.18748e+08	0.0265741	3.33673e+08	3.26426e+08	3.417e+08	3.33933e+08	0.0186824	2.12783e+08	2.17473e+08	2.16248e+08	2.15501e+08	0.00921698	2.81836e+08	2.84314e+08	2.9975e+08	2.88633e+08	0.0274581	2.7607e+08	2.81503e+08	2.88256e+08	2.81943e+08	0.0176805
P21912	SDHB	Succinate dehydrogenase [ubiquinone] iron-sulfur subunit, mitochondrial	9	9	0.218151	0.0871513		25.6486	25.5983	25.3975	25.8191	25.8312	25.6486	5.14946e+07	5.28687e+07	5.33211e+07	5.25615e+07	0.0147765	5.1664e+07	5.02817e+07	5.04685e+07	5.08047e+07	0.0120526	4.25713e+07	4.55418e+07	4.4515e+07	4.42093e+07	0.0278633	6.0133e+07	5.9502e+07	5.80995e+07	5.92448e+07	0.0143445	6.1448e+07	5.82231e+07	5.93922e+07	5.96878e+07	0.0223334	5.31811e+07	5.25096e+07	5.2006e+07	5.25656e+07	0.0091571
Q9NUJ1	ABHD10	Mycophenolic acid acyl-glucuronide esterase, mitochondrial	3	2	0.382848	0.0871632		19.9272	20.1206	20.0821	20.3211	20.7389	20.2185	874153	974583	1.14287e+06	997201	0.111173	1.45194e+06	945806	1.01091e+06	1.13622e+06	0.197874	876070	988508	1.4663e+06	1.11029e+06	0.230468	817176	1.46544e+06	1.65449e+06	1.31237e+06	0.273216	1.54058e+06	1.68913e+06	2.03248e+06	1.75406e+06	0.117441	1.1966e+06	1.49614e+06	975475	1.22274e+06	0.174494
P63241	EIF5A	Eukaryotic translation initiation factor 5A-1	14	14	-0.209988	0.0875485		28.8236	29.1026	28.936	28.7892	28.6517	28.7913	4.6445e+08	4.74605e+08	4.86197e+08	4.75084e+08	0.0187013	5.80562e+08	5.65344e+08	5.83418e+08	5.76441e+08	0.0137626	4.92186e+08	5.23323e+08	5.25185e+08	5.13565e+08	0.029473	4.43117e+08	4.73334e+08	4.75211e+08	4.63887e+08	0.0317032	4.04201e+08	4.16229e+08	4.44705e+08	4.21712e+08	0.0402735	4.59981e+08	4.57785e+08	4.75952e+08	4.64573e+08	0.0174279
P23246	SFPQ	Splicing factor, proline- and glutamine-rich	11	11	0.13309	0.0879726		27.1507	27.3153	27.2979	27.4234	27.4073	27.3324	1.40724e+08	1.44194e+08	1.62632e+08	1.49184e+08	0.0644485	1.65527e+08	1.67266e+08	1.67306e+08	1.667e+08	0.00497666	1.57015e+08	1.62967e+08	1.7412e+08	1.64701e+08	0.0430481	1.8217e+08	1.78537e+08	1.80573e+08	1.80426e+08	0.00823983	1.7201e+08	1.75028e+08	1.86034e+08	1.77691e+08	0.0339193	1.6724e+08	1.7022e+08	1.69664e+08	1.69042e+08	0.00765362
P30046	DDT	D-dopachrome decarboxylase	5	5	-1.01756	0.0884055		23.9007	24.0551	23.9598	22.3315	22.6992	23.8322	1.51447e+07	1.58781e+07	1.59598e+07	1.56609e+07	0.0234015	1.74252e+07	1.87524e+07	1.6113e+07	1.74302e+07	0.0618191	1.54012e+07	1.60492e+07	1.74982e+07	1.63162e+07	0.053728	5.97576e+06	5.60011e+06	4.25769e+06	5.27786e+06	0.139732	6.94804e+06	6.23843e+06	7.24326e+06	6.80991e+06	0.0619223	1.53378e+07	1.5351e+07	1.41152e+07	1.49347e+07	0.0388031
P17936	IGFBP3	Insulin-like growth factor-binding protein 3	2	2	-1.02004	0.0885393		21.9175	21.7896	20.9766	20.7262	21.028	19.8695	3.97039e+06	3.36147e+06	4.5521e+06	3.96132e+06	0.122716	4.0864e+06	3.36975e+06	3.41953e+06	3.62522e+06	0.0901268	2.17306e+06	2.03509e+06	1.98205e+06	2.0634e+06	0.0390172	1.29434e+06	2.0921e+06	1.81748e+06	1.73464e+06	0.190765	1.37546e+06	2.3181e+06	2.72098e+06	2.13818e+06	0.263703	907189	843488	1.12301e+06	957896	0.124873
Q709C8	VPS13C	Vacuolar protein sorting-associated protein 13C	4	4	0.459137	0.0885409		20.6971	21.1143	20.8576	21.6671	21.1143	21.265	1.78276e+06	1.40984e+06	1.91616e+06	1.70292e+06	0.12583	2.11091e+06	2.47397e+06	2.2309e+06	2.27193e+06	0.0664773	1.27889e+06	2.37541e+06	2.05138e+06	1.90189e+06	0.241844	3.26758e+06	3.67198e+06	3.0653e+06	3.33496e+06	0.0756277	2.00348e+06	2.20407e+06	2.60461e+06	2.27072e+06	0.11005	2.86753e+06	2.61168e+06	2.08363e+06	2.52095e+06	0.129473
P35579	MYH9	Myosin-9	104	91	-0.500058	0.088577		30.6047	30.6049	29.9455	29.9138	29.8078	29.9334	1.61719e+09	1.62799e+09	1.6533e+09	1.63283e+09	0.00926723	1.64126e+09	1.63029e+09	1.6275e+09	1.63302e+09	0.00363913	1.01721e+09	1.047e+09	1.03765e+09	1.03395e+09	0.01203	9.83884e+08	1.03868e+09	1.0118e+09	1.01146e+09	0.0221189	9.22492e+08	9.29406e+08	9.67577e+08	9.39825e+08	0.0210949	1.01661e+09	1.03756e+09	1.02166e+09	1.02527e+09	0.00870508
Q9BZZ5	API5	Apoptosis inhibitor 5	5	5	0.220791	0.0886082		22.6387	22.8191	22.5846	23.0359	22.8576	22.8113	5.87555e+06	6.79956e+06	6.90348e+06	6.52619e+06	0.0707963	7.7221e+06	7.4422e+06	7.04327e+06	7.40252e+06	0.0376291	6.51378e+06	6.26088e+06	6.10698e+06	6.29388e+06	0.0266455	7.68357e+06	9.26658e+06	8.85422e+06	8.60145e+06	0.0779545	6.52168e+06	8.75002e+06	7.53402e+06	7.60191e+06	0.119836	6.70329e+06	6.97655e+06	8.39294e+06	7.35759e+06	0.100651
Q9BYD2	MRPL9	39S ribosomal protein L9, mitochondrial	2	2	0.265036	0.0889948		20.5261	20.3645	20.6453	20.7223	20.9459	20.6628	1.49129e+06	1.65064e+06	1.38309e+06	1.50834e+06	0.0728538	1.36531e+06	1.35515e+06	1.33418e+06	1.35155e+06	0.00959024	1.88753e+06	1.51636e+06	1.51246e+06	1.63878e+06	0.107334	1.63161e+06	1.66095e+06	1.88536e+06	1.72597e+06	0.0656669	1.65234e+06	2.17486e+06	2.24255e+06	2.02325e+06	0.130346	1.57813e+06	1.62758e+06	1.78773e+06	1.66448e+06	0.053745
Q03252	LMNB2	Lamin-B2	15	14	0.185386	0.0891248		26.673	26.8623	26.9203	27.0401	27.0401	26.9316	1.10843e+08	1.0876e+08	1.00861e+08	1.06822e+08	0.040249	1.20938e+08	1.21665e+08	1.23116e+08	1.21906e+08	0.00742864	1.3417e+08	1.21218e+08	1.2437e+08	1.26586e+08	0.0435675	1.41789e+08	1.41503e+08	1.29895e+08	1.37729e+08	0.0402286	1.45037e+08	1.39349e+08	1.30677e+08	1.38354e+08	0.042677	1.28811e+08	1.24627e+08	1.29432e+08	1.27623e+08	0.016722
O14613	CDC42EP2	Cdc42 effector protein 2	4	3	0.491949	0.0894294		23.3239	22.8113	22.823	23.7594	23.3645	23.3101	1.02951e+07	1.09301e+07	1.022e+07	1.04817e+07	0.0303859	7.43452e+06	7.49776e+06	7.15268e+06	7.36165e+06	0.0203764	6.98923e+06	6.63888e+06	8.64306e+06	7.42373e+06	0.117729	1.39088e+07	1.52633e+07	1.33159e+07	1.41627e+07	0.0575473	1.07749e+07	1.04642e+07	1.10842e+07	1.07744e+07	0.0234909	9.35133e+06	1.12587e+07	1.07287e+07	1.04463e+07	0.0769554
Q86VP6	CAND1	Cullin-associated NEDD8-dissociated protein 1	17	16	-0.155638	0.0894647		25.3157	25.424	25.2124	25.1546	25.1073	25.2233	4.20628e+07	4.03672e+07	4.28585e+07	4.17628e+07	0.0248775	4.17276e+07	4.766e+07	4.56623e+07	4.50166e+07	0.0547481	3.74965e+07	3.9041e+07	4.00933e+07	3.88769e+07	0.0274324	3.93048e+07	3.63429e+07	3.64006e+07	3.73494e+07	0.0370242	3.52228e+07	3.78961e+07	3.5315e+07	3.61446e+07	0.0342802	3.87969e+07	3.75408e+07	4.11773e+07	3.91717e+07	0.0384984
P29144	TPP2	Tripeptidyl-peptidase 2	7	6	-0.488979	0.0896514		23.7433	23.8293	23.2608	22.965	23.3792	23.0221	1.46746e+07	1.28546e+07	1.45976e+07	1.40423e+07	0.0598461	1.50019e+07	1.57504e+07	1.39626e+07	1.4905e+07	0.049185	1.07611e+07	9.9027e+06	9.48792e+06	1.00506e+07	0.0527505	7.82967e+06	7.98937e+06	8.74402e+06	8.18769e+06	0.0487016	9.44196e+06	1.15812e+07	1.17089e+07	1.09107e+07	0.0953046	8.40138e+06	8.76171e+06	8.39201e+06	8.51837e+06	0.0202047
Q92629	SGCD	Delta-sarcoglycan	3	3	-0.452494	0.0897766		23.9444	23.76	23.362	23.0204	23.3569	23.3315	1.73751e+07	1.73768e+07	1.36773e+07	1.61431e+07	0.108007	1.37116e+07	1.46349e+07	1.42702e+07	1.42056e+07	0.026729	1.04288e+07	1.20647e+07	9.85011e+06	1.07812e+07	0.0869876	7.70482e+06	8.71838e+06	9.1015e+06	8.50824e+06	0.0692548	1.08453e+07	1.06367e+07	1.07476e+07	1.07432e+07	0.00793039	1.14074e+07	9.98383e+06	1.02764e+07	1.05559e+07	0.0581517
P46776	RPL27A	60S ribosomal protein L27a	4	4	-0.211231	0.0898675		25.859	26.0144	26.0103	25.9038	25.7106	25.6357	5.98428e+07	6.14755e+07	6.12673e+07	6.08619e+07	0.0119213	6.7613e+07	6.71412e+07	6.85985e+07	6.77842e+07	0.00895744	6.67783e+07	7.14745e+07	6.45174e+07	6.75901e+07	0.0428712	5.38543e+07	6.24937e+07	7.1993e+07	6.27803e+07	0.117997	5.58425e+07	4.28752e+07	6.60143e+07	5.49107e+07	0.172452	5.35665e+07	4.92349e+07	5.35987e+07	5.21334e+07	0.0393141
O14558	HSPB6	Heat shock protein beta-6	3	3	0.704473	0.089971		25.1833	25.0772	24.6757	26.1585	25.6891	25.2021	3.61187e+07	3.77741e+07	4.04001e+07	3.80976e+07	0.0462705	3.5271e+07	3.52522e+07	3.57173e+07	3.54135e+07	0.00607004	2.46441e+07	2.71829e+07	2.87035e+07	2.68435e+07	0.0623808	6.28593e+07	8.21748e+07	7.95911e+07	7.4875e+07	0.114346	4.88155e+07	5.40504e+07	5.93961e+07	5.40873e+07	0.0798626	4.08273e+07	3.77899e+07	3.71825e+07	3.85999e+07	0.0413054
P26022	PTX3	Pentraxin-related protein PTX3	4	4	-0.787245	0.0899808		22.6116	21.6456	22.176	20.9261	21.6145	21.5309	6.57002e+06	6.64893e+06	6.0068e+06	6.40858e+06	0.0446156	3.46597e+06	3.12689e+06	3.24935e+06	3.28074e+06	0.0427328	4.83211e+06	4.334e+06	5.04955e+06	4.73855e+06	0.0632093	1.69528e+06	2.05785e+06	2.2242e+06	1.99245e+06	0.110832	3.16548e+06	3.26867e+06	3.19805e+06	3.21074e+06	0.0134147	3.26585e+06	2.70339e+06	3.1206e+06	3.02995e+06	0.0786822
P62820	RAB1A	Ras-related protein Rab-1A	10	4	-0.163012	0.0905715		26.3366	26.4689	26.3117	26.3189	26.1496	26.1596	8.22256e+07	8.80843e+07	8.39244e+07	8.47448e+07	0.029042	9.03421e+07	9.49588e+07	9.33511e+07	9.2884e+07	0.0206007	7.94949e+07	8.22992e+07	8.80809e+07	8.32917e+07	0.0429191	7.94974e+07	8.6333e+07	8.53083e+07	8.37129e+07	0.0359563	7.48061e+07	7.23333e+07	7.61871e+07	7.44422e+07	0.0214157	7.15795e+07	7.87997e+07	7.45007e+07	7.496e+07	0.0395606
Q9UNM6	PSMD13	26S proteasome non-ATPase regulatory subunit 13	3	3	-0.354336	0.0906178		22.3332	21.9148	21.8956	21.5539	21.7888	21.738	5.09374e+06	5.67418e+06	5.08442e+06	5.28411e+06	0.0522026	3.6578e+06	4.05449e+06	4.14936e+06	3.95388e+06	0.0538499	4.23341e+06	3.52434e+06	3.94695e+06	3.90157e+06	0.0746498	3.15042e+06	3.35903e+06	2.72666e+06	3.0787e+06	0.0854577	4.00222e+06	3.17708e+06	3.69016e+06	3.62315e+06	0.0938904	3.59761e+06	3.2494e+06	3.64611e+06	3.49771e+06	0.0505172
P36957	DLST	Dihydrolipoyllysine-residue succinyltransferase component of 2-oxoglutarate dehydrogenase complex, mitochondrial	11	11	0.374701	0.0908408		26.726	26.6181	26.9428	27.0609	27.4073	26.9428	1.13677e+08	1.11872e+08	1.06392e+08	1.10647e+08	0.0279941	1.0387e+08	9.97812e+07	1.04182e+08	1.02611e+08	0.0195394	1.32196e+08	1.26396e+08	1.29407e+08	1.29333e+08	0.0183127	1.35995e+08	1.41662e+08	1.42636e+08	1.40098e+08	0.0209017	1.93563e+08	1.71028e+08	1.70087e+08	1.78226e+08	0.060888	1.23371e+08	1.30164e+08	1.32949e+08	1.28828e+08	0.0312261
O95202	LETM1	LETM1 and EF-hand domain-containing protein 1, mitochondrial	14	14	0.224222	0.0912635		24.7796	24.9134	24.989	25.1332	25.2499	24.9716	2.72369e+07	2.93726e+07	2.97405e+07	2.87833e+07	0.0383462	3.11091e+07	3.24191e+07	3.14085e+07	3.16456e+07	0.0177096	3.1632e+07	3.26531e+07	3.55245e+07	3.32699e+07	0.049531	3.64478e+07	3.70973e+07	3.68455e+07	3.67969e+07	0.007266	3.86139e+07	4.12103e+07	3.97613e+07	3.98619e+07	0.0266508	3.21854e+07	3.19141e+07	3.44668e+07	3.28554e+07	0.0348432
Q3SY69	ALDH1L2	Mitochondrial 10-formyltetrahydrofolate dehydrogenase	22	21	-0.510148	0.0912652		26.0144	26.6886	26.0999	25.7716	25.9068	25.594	6.5948e+07	6.57289e+07	7.16672e+07	6.77813e+07	0.0405593	1.07699e+08	1.04068e+08	1.12705e+08	1.08157e+08	0.032741	6.90029e+07	7.61533e+07	7.06023e+07	7.19195e+07	0.042605	5.34843e+07	5.84206e+07	5.99433e+07	5.72827e+07	0.0481281	5.82564e+07	6.2272e+07	6.82054e+07	6.29113e+07	0.0649603	5.2111e+07	4.81202e+07	5.1709e+07	5.06467e+07	0.0354229
Q96EP5	DAZAP1	DAZ-associated protein 1	7	7	0.149836	0.0915568		25.867	25.9203	25.7619	26.0254	26.0691	25.9043	6.00135e+07	6.10693e+07	6.23898e+07	6.11575e+07	0.0158954	6.5045e+07	6.40898e+07	6.13502e+07	6.3495e+07	0.0246625	5.569e+07	5.78836e+07	5.71556e+07	5.69098e+07	0.01603	6.55119e+07	6.99126e+07	6.9549e+07	6.83245e+07	0.0291891	6.74853e+07	6.70249e+07	7.65544e+07	7.03549e+07	0.0623659	5.97137e+07	6.44276e+07	6.41618e+07	6.27677e+07	0.0344477
P61916	NPC2	Epididymal secretory protein E1	5	5	-0.679016	0.0922557		23.7342	24.2993	24.7521	23.6076	23.4148	23.7263	1.35331e+07	1.43491e+07	1.39819e+07	1.39547e+07	0.0239136	1.97556e+07	2.04992e+07	2.1682e+07	2.06456e+07	0.0384217	2.71672e+07	2.8949e+07	2.86555e+07	2.82573e+07	0.0276038	1.26942e+07	1.23359e+07	1.3316e+07	1.2782e+07	0.0316795	1.11362e+07	1.12183e+07	1.11935e+07	1.11827e+07	0.00307515	1.45414e+07	1.31043e+07	1.39877e+07	1.38778e+07	0.0426449
P39060	COL18A1	Collagen alpha-1(XVIII) chain	4	3	-1.32042	0.0924714		20.2765	22.336	21.0862	19.9178	19.8611	19.9586	923638	1.7246e+06	1.16199e+06	1.27008e+06	0.264397	5.34879e+06	5.02241e+06	5.51179e+06	5.29433e+06	0.0384314	2.06265e+06	2.56078e+06	2.05527e+06	2.22623e+06	0.106269	981168	1.22369e+06	766567	990477	0.188533	936950	1.23558e+06	684433	952321	0.236546	1.17293e+06	1.03649e+06	847241	1.01889e+06	0.131068
Q8TCZ2	CD99L2	CD99 antigen-like protein 2	3	3	0.181119	0.0925646		23.48	23.4425	23.417	23.7182	23.6971	23.4676	1.24745e+07	1.16959e+07	1.09601e+07	1.17102e+07	0.0528041	1.26298e+07	1.07886e+07	1.09231e+07	1.14471e+07	0.0732105	1.22198e+07	1.02652e+07	1.09666e+07	1.11506e+07	0.0725088	1.16639e+07	1.50044e+07	1.4822e+07	1.38301e+07	0.110886	1.35479e+07	1.30066e+07	1.43807e+07	1.36451e+07	0.0414208	1.15509e+07	1.19637e+07	1.12381e+07	1.15842e+07	0.0256521
[truncated: 2,116 more rows]
